# Supplementary material for: Comparing sediment DNA extraction methods for assessing organic enrichment associated with marine aquaculture
Source: PeerJ. 2020 Oct 27;8:e10231. doi: 10.7717/peerj.10231 (PMC7597629; doi:10.7717/peerj.10231)
Supplement: Supplemental Information 2 [file peerj-08-10231-s002.xlsx]

## Sheet: taxo_sequence_16S
Feature ID	Taxon	Sequence
7e39dd2c2afd933539fbd7229b7244ee	D_0__Bacteria;D_1__Patescibacteria;D_2__Microgenomatia;D_3__Candidatus Woesebacteria	CTGGGAATCGTACGCAATGGACGAAAGTCTGACGTCGCGACGCCGCGTGAGGGATGAAGGCGTTTTCGTTGTAAACCTCTTTTGCCAGGACTGAGAAGGCCTGGAGAATAAGCACCGGCTAATTCCGTGCCAGCAGCAGCGGTAATACGGAAGGTGCAAGCGTTATCCGGATTTATTGGGCGTAAAGCGTTTCGTAGGCTTTACGATAAGTCATTTTTCAAAGACCGGGGCTCAACTTCGGGAAGGAGAATGATACTGTCGTGATTGGAGTACTTAGGGGCTACTGGAACTATCAGTGTAGGAGTGAAATCCGTTGATATTGATAGGAACACCGAGGGCGTAGGCAGGTAGCTGGGAGTATCTCGACGCTGAGGAACGAAAGCCAGGGGAGCAAAAC
0a80fe742e092cbff4fc9d8c001d072b	D_0__Bacteria	TGGGGAATATTGGACAATGGGCGCAAGCCTGATCCAGCCATGCCGCGTGAGTGAAGAAGGCCTTAGGGTTGTAAAACTCTTTCACCGGTGAAGATAATGACGGTAGCCGGAGAAGAAGCCCCGGCAAATTACGTGCCAGCAGCCGCGGTAATACGTATGGGGCGAGCGTTGTTCGGATTTACTGGGCGTAAAGGGTGCGTAGGCCGGATATTAAGTCGGATGTGAAATCTTATGGCTCAACCATAAAACTGCATCTGAAACTGATATTCTTGAGTATGGATGAGGAGAACGGAATTCCTAGTGTAGGGGTGAAATCTGTAGATATTAGGAAGAACACCAGCGGCGAAGGCGGTTCTCAAATCTGATACTGACGCTGAAGCACGAAAGCCAGGGGAGCGA…
7d15a2706ede6aadd2a2a83c26fc3e4b	D_0__Bacteria;D_1__Proteobacteria;D_2__Deltaproteobacteria;D_3__Myxococcales;D_4__Haliangiaceae;D_5__Haliangium;D_6__uncultured bacterium	TGGGGAATATTGGACAATGGGCGAAAGCCTGATCCAGCCACGCCGCGTGAGTGATGAAGGCCTTCGGGTCGTAAAGCTCTGTGGAGAGGGACGAAACCTTCCGGTTTAATAGATCGGGAATTGACGGTACCTCTTTAGCAAGCACCGGCTAACTCCGTGCCAGCAGCCGCGGTAATACGGAGGGTGCAAACGTTGCTCGGAATTATTGGGCGTAAAGCGCATGTAGGCGGTCTCATAAGTCGGATGTGAAAGCCCTAGGCTCAACCAAGGAAGTGCATTCGAAACTGTGAGACTTGAGTATGGGAGAGGGTTGCGGAATTCCCGGTGTAGAGGTGAAATTCGTAGATATCGGGAGGAACACCAGAGGCGAAGGCGGCAGCCTGGACCAATACTGACGCT…
2138f71bd9f27b45dab6c9cec155a0d8	D_0__Bacteria;D_1__Bacteroidetes;D_2__Bacteroidia;D_3__Chitinophagales;D_4__Saprospiraceae;D_5__Portibacter	TAAGGAATATTGGACAATGGGCGGAAGCCTGATCCAGCCATCCCGCGTGTAGGATGACTGCCCTATGGGTTGTAAACTACTTTTGTTAGGGAAGAAACCCCTCGATTTATCGAGGGCTGACGGTACCTAAAGAATAAGCACCGGCTAACTCCGTGCCAGCAGCCGCGGTAATACGGAGGGTGCAAGCGTTATCCGGAATCACTGGGTTTAAAGGGTGCGTAGGCGGCGTTATAGGTCAGAGGTGAAAGGCCACCGCTTAACGGTGGGACTGCCTTTGATACTGTAGTGCTTGAATAAGGTTGAGGTTAGCGGAATGAGTCATGTAGCGGTGAAATGCATAGATATGACTTAGAACACCAATTGCGAAGGCAGCTGGCTAGACCTTTATTGACGCTGAGG…
7b4081a9f45b5f00b3558e6263ae224c	D_0__Bacteria;D_1__Bacteroidetes;D_2__Bacteroidia;D_3__Flavobacteriales;D_4__Flavobacteriaceae;D_5__Aquibacter	TGAGGAATATTGGGCAATGGAGGCAACTCTGACCCAGCCATGCCGCGTGCAGGAAGACTGCCCTATGGGTTGTAAACTGCTTTTATACAGGAAGAAACAGCTCTACGTGTAGAGCCTTGACGGTACTGTAAGAATAAGGATCGGCTAACTCCGTGCCAGCAGCCGCGGTAATACGGAGGATCCAAGCGTTATCCGGAATCATTGGGTTTAAAGGGTCCGTAGGTGGATGATTAAGTCAGAGGTGAAATCCTGCAGCTCAACTGTAGAATTGCCTTTGATACTGGTTATCTTGAGTCATTATGAAGTGGTTAGAATGTGTAGTGTAGCGGTGAAATGCATAGATATTACACAGAATACCGATTGCGAAGGCAGATCACTAATAATGTACTGACACTGAGG…
820d9bd49bb341e94d05fa01938ccc12	D_0__Bacteria;D_1__Bacteroidetes;D_2__Bacteroidia;D_3__Bacteroidales;D_4__Bacteroidetes BD2-2	TGAGGAATATTGGTCAATGGGCGAGAGCCTGAACCAGCCATGCCGCGTGCAGGAGGACGGCCCTACGGGTTGTAAACTGCTTTTGTATGGGAAGAAAACGTCCTACGTGTAGGACACTGACGGTACCATAAGAATAAGCATCGGCTAACTCCGTGCCAGCAGCCGCGGTAATACGGAGGATGCAAGCGTTATCCGGATTTATTAGGTTTAAAGGGTGTGTAGGCGGACTCTTAAGTCAGTGGTGAAATCCCGGGGCTCAACTCCGGAACTGCCATAGATACTGGGAGTCTTGAGTACAGTTGAAGTAGGCGGAATGTGTAATGTAGCGGTGAAATGCTTAGATATTACACAGAACACCGATTGCGAAGGCAGCTTACTAAGCTGTTACTGACGCTGATG…
0d979846b9346c2fc7ac70bb46a981ea	D_0__Bacteria;D_1__Bacteroidetes;D_2__Bacteroidia;D_3__Cytophagales;D_4__Cyclobacteriaceae;D_5__uncultured	TAGGGAATATTGGTCAATGGGCGCAAGCCTGAACCAGCCATGCCGCGTGCAGGATGACGGCCTTCTGGGTTGTAAACTGCTTTTATCAGGGAAGAAAACGGCCATGCGTGGCAGATTGACGGTACCTGAAGAATAAGCACCGGCTAACTCCGTGCCAGCAGCCGCGGTAATACGGAGGGTGCAAGCGTTGTCCGGATTTATTGGGTTTAAAGGGTGCGTAGGCGGATTATTAAGTCAGTGGTGAAAGTTTGCGGCTCAACCGTAAAAGTGCCATTGATACTGGTAGTCTTGAGTACAGTAGAGGTAGGCGGAATTTATGGTGTAGCGGTGAAATGCATAGATACCATAAAGAACACCGATAGCGAAGGCAGCTTACTATACTGTTACTGACGCTGAGGC…
47c04dece6149a3481422f92e8d84403	D_0__Bacteria;D_1__Bacteroidetes;D_2__Bacteroidia;D_3__Bacteroidales;D_4__Prolixibacteraceae;D_5__Draconibacterium;D_6__Draconibacterium orientale	TGAGGAATATTGGTCAATGGACGCAAGTCTGAACCAGCCATCCCGCGTGCAGGATGACGGCCCTATGGGTTGTAAACTGCTTTTGTTTGCCAAGAATGGTTACTACGTGTAGTAATTTGACGGTAGCAAATGAATAAGGACCGGCTAACTCCGTGCCAGCAGCCGCGGTAATACGGAGGGTCCAAGCGTTATCCGGATTCATTGGGTTTAAAGGGTGCGCAGGCGGGCCTTTAAGTCAGTGGTGAAATCCCGAGGCTCAACTGCGGAACTGCCATTGATACTACAGGTCTTGAATACGGGAGAGGAGAGAGGAATTCCTGGTGTAGAGGTGAAATTCGTAGATATCAGGAGGAACACCGATGGCGAAGGCATCTCTCTGGACCGATATTGACGCTGAGG…
27760a93d8309ea33e6bb4662dccc710	D_0__Bacteria;D_1__Bacteroidetes;D_2__Bacteroidia;D_3__Chitinophagales;D_4__Saprospiraceae;D_5__uncultured	TAAGGAATATTGGACAATGGGCGCAAGCCTGATCCAGCCATCCCGCGTGCAGGATGACGGCCCTATGGGTTGTAAACTGCTTTTATCAGGGAAGAAACCCTAGTATTCATACTAGGCTGACGGTACCTGAAGAATAAGCACCGGCTAACTCCGTGCCAGCAGCCGCGGTAATACGGAGGGTGCAAGCGTTATCCGGAATCACTGGGTTTAAAGGGTGCGTAGGCGGCGTTGTAAGTCAGAAGTGAAAGCTTTCAGCTCAACTGGAAAATTGCTTTTGATACTGCAGTGCTTGAATCAGGTTGAGGTTAGCGGAATGTGACATGTAGCGGTGAAATGCATAGATATGTCATAGAACACCAATTGCGAAGGCAGCTAACTAGGCCTGTATTGACGCTGAGG…
2354034a424c41e264e25c62cb7e4c04	D_0__Bacteria;D_1__Lentisphaerae;D_2__Oligosphaeria;D_3__P.palmC41;D_4__uncultured bacterium;D_5__uncultured bacterium;D_6__uncultured bacterium	TCGAGAATCTTCCGCAATGGGCGAAAGCCTGACGGAGCAATGCCGCGTGAATGATGAAGGCCTTCGGGTTGTAAAATTCTGTCACCAGGGGCGAAATTTGACGGTACCTGGAGAGGAAGTGACGGCTAACTACGTGCCAGCAGCCGCGGTAATACGTAGGTCACGAGCGTTAATCGGATTTATTGGGCGTAAAGGGTCCGCAGGGGGTTTGTTAAGTCTGATGTGAAAGCCAACGGCTCAACCGTTGAACTGCATTGGAAACTGACAAACTAGAGTATCGGAGAGGTAAGTGGAATTCTTGGTGTAGCGGTGGAATGCTTAGATATCAAGAGGAACATCATTAGCGAAGGCGGCTTACTGGACGATTACTGACCCTCATGGACGAAAGCGTGGGTAGCA…
76aa33aab493daae352845776963925b	D_0__Bacteria;D_1__Planctomycetes;D_2__Planctomycetacia;D_3__Pirellulales;D_4__Pirellulaceae;D_5__Blastopirellula	TCGAGAATCTTCCGCAATGGACGAAAGTCTGACGGAGCGACGCCGCGTGCGGGATGAAGGCCTTCGGGTTGTAAACCGCTGTCGTAGGGGAGGAAATTTTGACCGATCCTAGGAGGAAGCACAGGCTAAGTTCGTGCCAGCAGCCGCGGTAATACGAACTGTGCGAACGTTATTCGGAATCACTGGGCTTAAAGGGTGCGTAGGCGGCTATGAAGGTCAGGTGTGAAATCCCACGGCTCAACCGTGGAACTGCGCCTGAAACCACGTAGCTTGAGGAAGTCAGAGGTAAGCGGAACTGATGGTGGAGCGGTGAAATGCGTTGATATCATCAGGAACACCGGTGGCGAAAGCGGCTTACTGGGACTTTTCTGACGCTGAGGCACGAAAGCCAGGGGAGCG…
b29aec49cd147a1e450b6e7724696617	D_0__Bacteria;D_1__Bacteroidetes;D_2__Bacteroidia;D_3__Flavobacteriales;D_4__Flavobacteriaceae;D_5__Zeaxanthinibacter	TGAGGAATATTGGACAATGGGCGAAAGCCTGATCCAGCCATGCCGCGTGCAGGAAGACGGCCCTACGGGTTGTAAACTGCTTTTATACGGGAAGAATAATCACGACGTGTCGTGAGATGACGGTACCGTAAGAATAAGGACCGGCTAACTCCGTGCCAGCAGCCGCGGTAATACGGAGGGTCCGAGCGTTATCCGGAATTATTGGGTTTAAAGGGTCCGCAGGCGGGCTTATAAGTCAGGGGTGAAATGGTGCGGCTCAACCGTAGCACTGCCCTTGATACTGTTAGTCTTGAGTTATGGTGGAGTGGCCGGAATATGTAGTGTAGCGGTGAAATGCATAGATATTACATAGAACACCGATCGCGAAGGCAGGTCACTAACCATTAACTGACGCTGATG…
90d62b0d4c549014772ff174ca0b554a	D_0__Bacteria;D_1__Bacteroidetes;D_2__Rhodothermia;D_3__Rhodothermales;D_4__Rhodothermaceae;D_5__uncultured;D_6__uncultured Bacteroidales bacterium	TGAGGAATATTGGGCAATGGGCGAAAGCCTGACCCAGCCACGCCGCGTGCAGGATGACACCCCTATGGGGCGTAAACTGCTTTTGTACGGGAAGAACCCTCTCGATTCGTCGGGAGCTGACGGTACTGTACGAATAAGGACCGGCTAACTCCGTGCCAGCAGCCGCGGTAATACGGAGGGTCCAAGCGTTGTCCGGATTTATTGGGTGTAAAGGGTGTGTAGGCGGGCTTGTAAGTCAGAGGTGAAATCCTACGGCTCAACCGTAGAACTGCCTTTGATACTGCAGGTCTTGAGTCCTGGAGAGGTTGTTAGAATTCGTGGTGTAGCGGTGAAATGCGTAGATATCACGAGGAATACCGGTTACGAAGGTTGACAGCTGGACAGGTACTGACGCTGAGG…
7a0e00409aaba033769881d569e85d8e	D_0__Bacteria;D_1__Bacteroidetes;D_2__Bacteroidia;D_3__Cytophagales;D_4__Cyclobacteriaceae;D_5__uncultured	TAGGGAATATTGGTCAATGGTCGAAAGACTGAACCAGCCATGCCGCGTGCAGGAAGACGGCCTTCTGGGTTGTAAACTGCTTTTCTCAAGGAAGAAAAATTCCGACGTGTCGGAAGATTGACGGTACTTGAGGAATAAGCACCGGCTAACTCCGTGCCAGCAGCCGCGGTAATACGGAGGGTGCAAGCGTTGTCCGGATTTATTGGGTTTAAAGGGTGCGTAGGCGGTACTATAAGTCAGTGGTGAAATACTACAGCTCAACTGTAGAGGTGCCATTGAAACTGTAGTACTTGAGTACAGACGAGGTAGGCGGAATTTATGGTGTAGCGGTGAAATGCATAGATACCATAAAGAACACCGATAGCGAAGGCAGCTTACTAGACTGTAACTGACGCTGAG…
ad0ab485428f7f9d7a2ddc7aa412fd19	D_0__Bacteria;D_1__Planctomycetes;D_2__Phycisphaerae;D_3__CCM11a;D_4__uncultured bacterium;D_5__uncultured bacterium;D_6__uncultured bacterium	CAACGAATATTCCGCAATGGGCGAAAGCCTGACGGAGCGACACCGCGTGCAGGATGAAGTCCCTCGGGATGTAAACTGCTGTCAGGGATTAGGAAGATCTGACCAATCCCAAAGGAAGCCTCGGCTAACTCCGTGCCAGCAGCCGCGGTAATACGGAGGAGGCGAGCGTTGTTCGGAATCACTGGGCTTAAAGCGGGTGTAGGCGGAGTAACAGGTGTTCTGTGAAAGCCCTCGGCTCAACCGAGGAATAGCAGGGCAAACCGTTACTCTTGAGGCAGGTAGGGGCAAGTGGAACCATGGGTGGAGCGGTGAAATGCGTAGATATCCATGGGAACGCCGGTGGCGAAAGCGGCTTGCTGGGCCTGTCCTGACGCTGAGGCCCGAAAGCGTGGGTAGCAA…
e4a791545194356d2c5b4fb132cf08db	D_0__Bacteria;D_1__Actinobacteria;D_2__Coriobacteriia;D_3__OPB41;D_4__uncultured bacterium;D_5__uncultured bacterium;D_6__uncultured bacterium	TGGGGAATTTTGCGCAATGGGCGAAAGCCTGACGCAGCAACGCCGCGTGCGGGATGAAGGCCCTCGGGTTGTAAACCGCTTTCAGCAGGGATGAATATGACAGTACCTGCACAAGGAGCCCCGGCTAAATACGTGCCAGCAGCCGCGGTAATACGTATGGGGCAAGCGTTATCCGGATTCATTGGGCGTAAAGCGCGTGTAGGCGGCTTGTTAAGTCAGATGTGAAAACCGGGGGCTTAACCCGCGGCGTGCATCTGAAACTGGCAGGCTTGAGTCTGGTAGAGGAAAGTGGAATTGCTAGTGTAGCGGTGAAATGCGCAGATATTAGCAGGAACACCAGTGGCGAAGGCGGCTTTCTGGGCCACGACTGACGCTGAGACGCGAAAGCTAGGGGAGCAA…
1db51f6d3632379dedb0070e96868c4d	D_0__Bacteria;D_1__Proteobacteria;D_2__Alphaproteobacteria;D_3__Sphingomonadales;D_4__Sphingomonadaceae;D_5__Parasphingopyxis;D_6__uncultured bacterium	TGGGGAATATTGGACAATGGGGGAAACCCTGATCCAGCCATGCCGCGTGAGTGATGAAGGCCCTAGGGTTGTAAAGCTCTTTTACCCGCGAAGATAATGACGGTAGCGGGAGAATAAGCTCCGGCTAACTCCGTGCCAGCAGCCGCGGTAATACGGAGGGAGCTAGCGTTGTTCGGAATTACTGGGTGTAAAGCGCGCGTAGGCGGCTATTCAAGTCAGAGGTGAAAGCCCGGGGCTCAACTCCGGAACTGCCTTTGAAACTAGATAGCTAGAATCCAGGAGAGGTGAGTGGAATTCCGAGTGTAGAGGTGAAATTCGTAGATATTCGGAAGAACACCAGTGGCGAAGGCGACTCACTGGACTGGTATTGACGCTGAGGTGCGAAAGCGTGGGGAGCAA…
2aba26f06beef1faba8301eec4976f00	D_0__Bacteria;D_1__Planctomycetes;D_2__Phycisphaerae;D_3__Phycisphaerales;D_4__Phycisphaeraceae;D_5__Urania-1B-19 marine sediment group;D_6__uncultured bacterium	TAACGAATCTTCCGCAATGCGCGAAAGCGTGACGGAGCAATGCCGCGTGCAGGATGAAGCCTTTCGGGGTGTAAACTGCTGTCAGGGGCTAGGAACTCAATGACCAACCCCAAAGGAAGGGCCGGCTAACTTCGTGCCAGCAGCCGCGGTAATACGAAGGGCCCAAGCGTTGCGCGGAATCACTGGGCTTAAAGCGTACGTAGGCGGAAACACAGGCGTTTTGTGAAAGCCCTCGGCTCAACCGAGGAATTGCTTGGCGAACCGTGTTTCTTGAGACAGGTAGGGGTTGTCGGAACGCTAGGTGGAGTGGTGAAATGCGTTGATATCTAGCGGAACGCCAAAGGAGAAATCAGGCAACTGGGCCTGTTCTGACGCTGAGGTACGAAAGCGTGGGGAGCG…
ea174a238798af76a85a2013abbf7dfa	D_0__Bacteria;D_1__Bacteroidetes;D_2__Bacteroidia;D_3__Chitinophagales;D_4__Saprospiraceae;D_5__uncultured;D_6__uncultured bacterium	TGGGGAATTTTGCGCAATGGGCGAAAGCCTGACGCAGCAACGCCGCGTGGGGGATGAAGGCCTTCGGGTCGTAAACTCCTGTCGAGGGGGAAGAAAACCGGGCAACCGGTCTGACTGTACCCCTTGAGGAAGCCACGGCCAACTCCGTGCCAGCAGCCGCGGTAATACAGAGGGTGCAAGCGTTATCCGGAATCACTGGGTTTAAAGGGTGCGTAGGCGGTTTGATTAGTCAGAGGTGAAAGTTTGCAGCTCAACTGTAAAATTGCCTTTGATACTGTCAGACTTGAAACAGGTTGAGGTTGGCGGAATGTGGCATGTAGCGGTGAAATGCATAGATATGCCATAGAACACCAATTGCGAAGGCAGCCAGCTGGGCCTTGTTTGACGCTGAGGCACGAA…
0341000fcdacd39e4c2260544d60b24f	D_0__Bacteria;D_1__Bacteroidetes;D_2__Bacteroidia;D_3__Flavobacteriales;D_4__Flavobacteriaceae	TGAGGAATATTGGGCAATGGAGGCAACTCTGACCCAGCCATGCCGCGTGCAGGAAGACGGCCCTATGGGTTGTAAACTGCTTTTATACAGGAAGAAACCTTTTCACGTGTGAAGAGCTGACGGTACTGTACGAATAAGGACCGGCTAACTCCGTGCCAGCAGCCGCGGTAATACGGAGGGTCCAAGCGTTATCCGGAATCATTGGGTTTAAAGGGTCCGTAGGCGGGCGATTAAGTCAGAGGTGAAATCCCACAGCTCAACTGTGGAACTGCCTTTGATACTGGTTGTCTTGAGTTATAGTGAAGTAGATAGAATGTGTAGTGTAGCGGTGAAATGCATAGATATCCGGAGGAACATCAGTGGCGAAGGCGGCTTACTGGACTAAAATTGACGCTGAGG…
8d0ba3f1798533ed94c069d901c1c208	D_0__Bacteria;D_1__Fusobacteria;D_2__Fusobacteriia;D_3__Fusobacteriales;D_4__Fusobacteriaceae;D_5__Propionigenium	TGGGGAATATTGGACGATGGGCGCAAGCCTGATCCAGCAATGCCGCGTGTGTGAAGAAGGCCTGCGGGTTGTAAAGCACTTTCAGATGGGAAGATAATGACGGTACCAGTAGAAGAAGCGACGGCTAAATACGTGCCAGCAGCCGCGGTAATACGTATGTCGCAAGCGTTATCCGGAATTATTGGGCGTAAAGCGCGTCTAGGCGGTCTTTTAAGTCTGATGTTAAAATGCGGGGCTCAACTCCGTATTGCGTTGGAAACTGGAAGACTAGAGTATCAGAGAGGTGGGCGGAACTACAAGTGTAGAGGTGAAATTCGTAGATATTTGTAGGAATGCCGATTGGGAAGCCAGCTCACTGGATGAATACTGACGCTGAAGCGCGAAAGCGTGGGGAGCAAA…
ec956d9dec37d07b64b9b4ea02a2947c	D_0__Bacteria;D_1__Chloroflexi;D_2__Anaerolineae;D_3__Anaerolineales;D_4__Anaerolineaceae;D_5__uncultured	TAGGGAATATTGCACAATGGGCGAAAGCCTGATGCAGCAACGCCGCGTGCGCGAAGAAGGCCTTCGGGTTGTAAAGCGCTTTTCGGGGAGAAGAGAAAGGACGGTATCCCCGGAATAAGGATCGGCTAACTACGTGCCAGCAGCCGCGGTAAAACGTAGGATCCGAGCGTTATCCGAATTCACTGGGCGTAAAGCGCGTGTAGGCGGTTCGGTAAGTTGGATGTGAAAGCTCCCGGCTCAACTGGGAGAGGACGTTCAAAACTGTTGGACTAGAGGGCGGAAGAGGGAGGTGGAATTCCCGGTGTAGTGGTGAAATGCGTAGATATCGGGAGGAACACCAGTGGCGAAGGCGGCCTCCTGGGCCGCACCTGACGCTCAGACGCGAAAGCTAGGGTAGCA…
92b10f6abafc6b20f9491e9b2fac4a55	D_0__Bacteria;D_1__Planctomycetes;D_2__Planctomycetacia;D_3__Pirellulales;D_4__Pirellulaceae;D_5__Pir4 lineage	TCGAGAATCTTCGGCAATGGACGCAAGTCTGACCGAGCGACGCCGCGTGCGGGATGAAGGCCTTCGGGTTGTAAACCGCTGTCAGAGGGGATGAAATGCCATGGGGTTCTCTCCATGGTTTGACAAATCCTCAGAGGAAGTACGGGCTAAGTTCGTGCCAGCAGCCGCGGTAAGACGAACCGTACGAACGTTATTCGGAATCACTGGGCTTAAAGGGTGCGTAGGCGGTCCGGCAAGTTGGGTGTGAAATCCCTCGGCTTAACCGAGGAATGGCGCTCAAAACTGCCGGACTCGAGGGAGACAGAGGCGAGCGGAACTTAGGGTGGAGCGGTGAAATGCGTTGATATCCTAAGGAACACCAGTAGCGAAAGCGGCTCGCTGGGTCTCTTCTGACGCTCA…
da0bbb0fcc25003404a8b7a674a67373	D_0__Bacteria;D_1__Bacteroidetes;D_2__Bacteroidia;D_3__Chitinophagales;D_4__Saprospiraceae;D_5__uncultured	TAAGGAATATTGGACAATGGGCGCAAGCCTGATCCAGCCATCCCGCGTGCAGGAAGACGGCCCTATGGGTTGTAAACTGCTTTTGTATAGGAAGAACACGTTTCATTTATGAAGCTTTGACGGTACTATACGAATAAGCACCGGCTAACTCCGTGCCAGCAGCCGCGGTAATACGGAGGGTGCAAGCGTTATCCGGAATCACTGGGTTTAAAGGGTGCGTAGGCGGGCCGATAAGTCAGAGGTGAAAGTTTTCAGCTTAACTGGACAATTGCCTTTGATACTGTTGGTCTTGAATTAGGTTGAGGTTAGTAGAATGTGACATGTAGCGGTGAAATGCATAGATATGTCATAGAATACCAATTGCGAAGGCAGCTAGCTGGGCCTATATTGACGCTGAGG…
607ff5f7e928c6ea59dc3f0dc7fbcf84	D_0__Bacteria;D_1__Planctomycetes;D_2__Phycisphaerae;D_3__Pla1 lineage;D_4__uncultured bacterium;D_5__uncultured bacterium;D_6__uncultured bacterium	CAACGAATATTCCGCAATGGGCGAAAGCCTGACGGAGCGACGCCGCGTGAGGGATGAAGTCCTTCGGGATGTAAACTTCAATAGTATGTCAGGAAGTAATGCAGGTTAATATCCTGCTGCGTTGACCATCATACGAAAGGGGTGGCTAACTCCGTGCCAGCAGCCGCGGTAAGACGGAGACCCCTAGCGTTGTTCGGAATTACTGGGCTTAAAGAGCGTGTAGGCGGAGCGGTAAGTACCCTGTGAAAGCCCCGGGCTCAACCCGGGAATTGCTTGGTATACTGCCGTTCTTGAGGCAGGTAGGGGTTACTGGAACCTTGGGTGGAGCGGTGAAATGCGTAGATATCTAAGGGAACGCCTGTGGCGAAAGCGGGTAACTGGACCTGATCTGACGCTGAG…
67da2a9624fb9ca40fce01df8c1d89e2	D_0__Bacteria;D_1__Planctomycetes;D_2__Planctomycetacia;D_3__Pirellulales;D_4__Pirellulaceae;D_5__Blastopirellula;D_6__uncultured bacterium	TCGAGAATCTTCCGCAATGGACGAAAGTCTGACGGAGCGACGCCGCGTGCGGGATGAAGGCCTTCGGGTTGTAAACCGCTGTCAGAGGGGAGGAAATTTTGACCGATCCTCAGAGGAAGCACAGGCTAAGTTCGTGCCAGCAGCCGCGGTAATACGAACTGTGCGAACGTTATTCGGAATCACTGGGCTTAAAGGGTGCGTAGGCGGCAATGTAAGTGGGGTGTGAAATCCCTCGGCTCAACCGAGGAACTGCGCTCCAAACTACATCGCTTGAGGAAGACAGAGGTGAGCGGAACTGATGGTGGAGCGGTGAAATGCGTTGATATTATCAGGAACACCGGTGGCGAAAGCGGCTCACTGGGTCTTTTCTGACGCTGAGGCACGAAAGCTAGGGGAGCG…
b4b98f59fda60f162ca1e6227b0ded52	D_0__Bacteria;D_1__Bacteroidetes;D_2__Bacteroidia;D_3__Sphingobacteriales;D_4__NS11-12 marine group	TAGGGAATATTGGACAATGGGCGAAAGCCTGATCCAGCCATGCCGCGTGCAGGATGACAGCCCTACGGGTTGTAAACTGCTTTTATATGGGAAGAAACCCGAGTACGTGTACTCGGCTGACGGTACCATAAGAATAAGGATCGGCTAACTCCGTGCCAGCAGCCGCGGTAATACGGAGGATCCAAGCGTTGTCCGGATTTATTGGGTTTAAAGGGTACGTAGGCGGAATAATAAGTCAGTGGTGAAAGCCCGCAGCTCAACTGCGGAACTGCCATTGAAACTGCTATTCTTGAGTTCGGTCGAGGTGGATGGAATATATCATGTAGCGGTGAAATGCTTAGATATGATATAGAACACCGATTGCGAAGGCAGTCCACTAGACCGATACTGACGCTGAGG…
6d0739342b6383287d28f23549cb7f2d	D_0__Bacteria;D_1__Proteobacteria;D_2__Deltaproteobacteria;D_3__SAR324 clade(Marine group B);D_4__uncultured bacterium;D_5__uncultured bacterium;D_6__uncultured bacterium	TGGGGAATATTGCGCAATGGGGGCAACCCTGACGCAGCAATGCCGCGTGAGTGAAGAAGGCCTTCGGGTCGTAAAGCTCTTTATCCAAGGGAAGATGATGACGGTACCTTGGGAATAAGCACCGGCTAACTACGTGCCAGCAGCCGCGGTAATACGTAGGGTGCAAGCGTTGTTCGGAATCACTGGGCGTAAAGGGCGTGTAGGCGGACTTGAAGGCAGGGGGTGAAATCCCGAGGCTCAACCTCGGAATTGCTCCCTGAACCACAAGACTTGAGGGCGCGAGAGGAGATCGGAATTCCAGGTGTAGAGGTGAAATTCGTAGATATCTGGAGGAACACCGGCGGCGAAAGCGGATCTCTGGCGCGCATCTGACGCTGAGGCGCGAAAGCGTGGGTAGCA…
0e36b606d8b857dfc950e03304d0d376	D_0__Bacteria;D_1__Planctomycetes;D_2__Planctomycetacia;D_3__Pirellulales;D_4__Pirellulaceae;D_5__Rhodopirellula;D_6__uncultured planctomycete	TCGAGAATCTTCCGCAATGGGCGCAAGCCTGACGGAGCGACGCCGCGTGCGGGATGAAGGCCCTCGGGTTGTAAACCGCTGTCAGTTGGGAGGAAATGCCATAGGGCACTCTCTATGGTTTGACCGATCTTCAGAGGAAGTCCGGGCTAAGTTCGTGCCAGCAGCCGCGGTAAGACGAACCGGACGAACGTTATTCGGAATCACTGGGCTTAAAGGGTACGTAGGCGGCTTTGTAGGTTGGGTGTGAAATCCCACGGCTCAACCGTGGAACTGCGCTCAAAACCACAGGGCTTGAGGGAAGCAGAGGTAAGCGGAACTGATGGCGGAGCGGTGAAATGCGTTGATATCATCAGGAACACCAGTGGCGAAGGCGGCTTACTGGGCTTCTTCTGACGCTGA…
e304d78d310c5fbd1dc7662432a3c328	D_0__Bacteria;D_1__Chloroflexi;D_2__Anaerolineae;D_3__Anaerolineales;D_4__Anaerolineaceae;D_5__uncultured;D_6__uncultured Chloroflexi bacterium	TAGGGAATATTGCCCAATGGACGAAAGTCTGAGGCAGCAACGCCGCGTGCGCGATGAAGGCCTTCGGGTTGTAAAGCGCTTTTCTGGAGGAAGAGGAAGGACGGTACTCCAGGAATAAGTCTCGGCTAACTACGTGCCAGCAGCCGCGGTAAAACGTAGGAGGCAAGCGTTATCCGGATTTACTGGGCGTAAAGCGCGTGTAGGCGGTTTGGTAAGTCGGATGTGAAAGCTCCTGGCTCAACTGGGAGAGGCCATTCGAAACTACCAGACTTGAGGGCAGTAGAGGAAGGTGGAATTCTGGGTGTAGCGGTGAAATGCGTAGATATCCGGAGGAACACCAGTGGCGAAGGCGGCCTTCTGGACTGTCCCTGACGCTCAGACGCGAAAGCTAGGGTAGCG…
c2d5307f2b6afc7002ff275dac46bc41	D_0__Bacteria;D_1__Patescibacteria;D_2__Gracilibacteria;D_3__uncultured bacterium;D_4__uncultured bacterium;D_5__uncultured bacterium;D_6__uncultured bacterium	TGAGGAATTTTCCGCAATGGGCGAAAGCCTGATGGAGCAATCCCGCGTGCAGGATGACACCTTTCGGGGCGTAAACTGCTTTTCTGAGGGAAGAAATTTTGACGGTACCTCAGGAATAAAGGGCGGCTAATTACGTGCCAGCAGCCGCGGTAATACGTAAGCCCTAAGCGTTATCCGGAATTATTGGGTGTAAAGCGTTCGAAGGCGGATCAGTTAGTCTGATGTTAAATACCTACGGCTCAACCGAGGTCTCGTGTCAGAAACTGCTGAACTAGAGTAATGCAGAGGCAGGTAGAATTTCCATTGTAGGGGTAAAATCCGTAGATAATGGAAGGAATACCAAAAGCGAAGGCAGCCTGCTGGGCATTTACTGACGCTGCGCGAACGAAAGCGTGGGGA…
02596adc632c90ad8052df7fa9f7670b	D_0__Bacteria;D_1__Bacteroidetes;D_2__Bacteroidia;D_3__Chitinophagales;D_4__Saprospiraceae;D_5__uncultured;D_6__uncultured bacterium	TAAGGAATATTGGACAATGGGCGGAAGCCTGATCCAGCCATCCCGCGTGCAGGATGAATGCCCTATGGGTTGTAAACTGCTTTTATAAGGGAAGAAACCCCTGGACTTGTCTGGGGCTGACGGTACCTTAAGAATAAGCACCGGCTAACTCCGTGCCAGCAGCCGCGGTAATACGGAGGGTGCAAGCGTTATCCGGAATCACTGGGTTTAAAGGGTGCGTAGGCGGCCGAATTAGTCAGAGGTGAAATCCTACAGCTTAACTGTAGAACTGCCTTTGAAACTGTTCGGCTAGAATAGAGTTGAGGTTAGCGGAATGTGACATGTAGCGGTGAAATGCATAGATATGTCATAGAACACCAATTGCGAAGGCAGCTAACTGGGCTTTTATTGACGCTGAGG…
c1776c41f7c10e1e02fb84be6844d786	D_0__Bacteria;D_1__Firmicutes;D_2__Clostridia;D_3__Clostridiales;D_4__Defluviitaleaceae;D_5__Defluviitaleaceae UCG-011;D_6__uncultured bacterium	TGGGGGATATTGCACAATGGGCGAAAGCCTGATGCAGCAACGCCGCGTGAAGGAAGACGGTTTTCGGATTGTAAACTTCTATCAGCTGGGAAGAAAATGACTGTACCAGACTAAGAAGCCCCGGCTAACTACGTGCCAGCAGCCGCGGTAATACGTAGGGGGCAAGCGTTATCCGGATTTACTGGGTGTAAAGGGTACGTAGGCGGCTTACTAAGTCAGATGTGAAAGCCCGGAGCTCAACTCCGGGACTGCATTTGAAACTGGTGAGCTAGAGTACAGGAGAGGTAAGTGGAATTCCTAGTGTAGCGGTGAAATGCGTAGATATTAGGAAGAACACCAGTGGCGAAGGCGACTTACTGGACTGTAACTGACGCTGAGGTACGAAAGCGTGGGGAGCGA…
a56bdab502c7c63b15aa9139b69a6297	D_0__Bacteria;D_1__Planctomycetes;D_2__Planctomycetacia;D_3__Pirellulales;D_4__Pirellulaceae;D_5__Pir4 lineage;D_6__uncultured bacterium	TCGAGAATCTTCGGCAATGGACGCAAGTCTGACCGAGCAATGCCGCGTGCGGGATGAAGGCCTTCGGGTTGTAAACCGCTGTCAGAGGGGATGAACTTTTAGGTGGCTATCCATCTAATTTGACATATCCTCAGAGGAAGGGCGGGCTAAGTTCGTGCCAGCAGCCGCGGTAAGACGAACCGCCCAAACGTTATTCGGAATCACTGGGCTTAAAGGGTGCGTAGGCGGCGTCGTAAGTCGGGTGTGAAATCCCACGGCTCAACCGTGGAACTGCGCCCGATACTGCGGTGCTCGAGGGAGATAGAGGGAAGCGGAACTGATGGTGGAGCGGTGAAATGCGTTGATATCATCAGGAACACCGGTGGCGAAAGCGGCTTCCTGGGTCTCTTCTGACGCTGA…
3564d899dfbaea02c431a6db5292862f	D_0__Bacteria;D_1__Patescibacteria;D_2__ABY1;D_3__Candidatus Kuenenbacteria;D_4__uncultured bacterium;D_5__uncultured bacterium;D_6__uncultured bacterium	TTGGGAATCGTTCGCAATGGGGGAAACCCTGACGACGCGACGCCGCGTGTGGGATGAAGTCTTTCGGGATGTAAACCACTTTTCTAGAGGAAAAAGATCTGATGGTACTCTAGGAATAAGAGGTTGCTAACTCTGTGCCAGCAGCAGCGGTAATACAGAGACCTCGAGCGTTTTCCGGAATCATTGGGCGTAGAGCGTTCGTAAACGGTTAGGTAAGTTAGACTTGAAAGCCCGCGGCTCAACCGCGGATACGGGTTTAATACTGCCAAACTAGAGGGTTAGAGAGGCTGATGGAATTCCCGGTGTAGCAGTGAAATGCGTTAATATCGGGAAGAACACCAATTGCGAAGGCAATCAGCTGGCTAACTTCTGACGTCCAGGAACGAAAGCGTGGGTAGC…
aed8d26d0e8d0dcf1dedc7710266092b	D_0__Bacteria;D_1__Bacteroidetes;D_2__Bacteroidia;D_3__Flavobacteriales;D_4__Flavobacteriaceae;D_5__uncultured;D_6__uncultured deep-sea bacterium	TGAGGAATATTGGACAATGGAGGCAACTCTGATCCAGCCATGCCGCGTGCAGGAAGACTGCCCTATGGGTTGTAAACTGCTTTTATATAGGAAGAAACGTCCCTTCGCGTAAGGGATTTGACGGTACTATAAGAATAAGGACCGGCTAACTCCGTGCCAGCAGCCGCGGTAATACGGAGGGTCCGAGCGTTATCCGGAATCATTGGGTTTAAAGGGTCCGTAGGCGGGCGTCTAAGTCAGTGGTGAAATCTTACAGCTCAACTGTAAAATTGCCATTGATACTGGATGTCTTGAATTAGTGTGAAGTGGTTAGAATGTGTAGTGTAGCGGTGAAATGCATAGATATTACACAGAATACCAATTGCGAAGGCAGATCACTAACACTATATTGACGCTGAG…
d870255394cfaa0b9e798d1087e8be81	D_0__Bacteria;D_1__Bacteroidetes;D_2__Bacteroidia;D_3__Bacteroidales;D_4__Prolixibacteraceae	TGAGGAATATTGGTCAATGGACGAGAGTCTGAACCAGCCATCCCGCGTGCAGGATGACGGCCCTATGGGTTGTAAACTGCTTTTCTACGCCAAGAAATCTGATTACGTGTAATTGGTTGACGGTAGCGTAGGAATAAGCATCGGCTAACTCCGTGCCAGCAGCCGCGGTAATACGGAGGATGCAAGCGTTATCCGGATTCATTGGGTTTAAAGGGTGCGCAGGCGGGCTTGTAAGTCAGTGGTGAAATCTCAGGGCTTAACTCTGAAACTGCCATTGATACTGCAAGTCTAGAGTACATTTGACGTGGGCGGAATGTAGCATGTAGCGGTGAAATGCTTAGATATGCTACAGAACACCGATTGCGAAGGCAGCTCACGAAACTGATACTGACGCTGAGG…
7a7179e2fde41bd3fbbd43a26fd006f9	D_0__Bacteria;D_1__Bacteroidetes;D_2__Bacteroidia;D_3__Flavobacteriales;D_4__Flavobacteriaceae;D_5__Lutibacter	TGAGGAATATTGGGCAATGGACGAAAGTCTGACCCAGCCATGCCGCGTGCAGGAAGACGGCCCTATGGGTTGTAAACTGCTTTTATATAGGAAGAAACCCCCGAACGTGTTTGGGGCTGACGGTACTATATGAATAAGCACCGGCTAACTCCGTGCCAGCAGCCGCGGTAATACGGAGGGTGCAAGCGTTATCCGGAATCATTGGGTTTAAAGGGTCCGTAGGCGGATTAATAAGTCAGAGGTGAAATCCCACAGCTTAACTGTGGAACTGCCTTTGATACTGTTAGTCTTGAGTTATATGGAAGTAGATAGAATGTGTAGTGTAGCGGTGAAATGCATAGATATTACACAGAATACCGATTGCGAAGGCAGTCTACTACGTATATACTGACGCTAATG…
4b68155f18ce37c974b6cf2fa832f9ca	D_0__Bacteria;D_1__Proteobacteria;D_2__Gammaproteobacteria;D_3__Steroidobacterales;D_4__Woeseiaceae;D_5__Woeseia	TGGGGAATCTTGCGCAATGGGCGAAAGCCTGACGCAGCAACGCCGCGTGAGGGAAGACGGCTTTCGGGTTGTAAACCTCTTTCAGGGGGGACGAAGCCACTAGGGTTAATAGCCCATAGGGTGACGGTACCCCCAGAAGAAGCCCCGGCTAACTACGTGCCAGCAGCCGCGGTAATACGGAGGGTGCGAGCGTTAATCGGAATTACTGGGCGTAAAGCGCGCGTAGGCGGCTTTGTAAGTCGGATGTGAAATCCCCGGGCTTAACCTGGGAACTGCATTCGATACTGCATAACTAGAGTATGGTAGAGGGAAGTGGAATTCCGGGTGTAGCGGTGAAATGCGTAGATATCCGGAGGAACACCGGTGGCGAAGGCGACTTCCTGGGCCAATACTGACGCT…
689b7d0fb350dbdcb666e6232cae1eda	D_0__Bacteria;D_1__Planctomycetes;D_2__Planctomycetacia;D_3__Pirellulales;D_4__Pirellulaceae;D_5__Pir4 lineage	TCGAGAATCTTCGGCAATGGGCGCAAGCCTGACCGAGCGATGCCGCGTGCGGGATGAAGGCCTTCGGGTTGTAAACCGCTGTCAGTTGGGAGGAAATTTTAGGGGGTCATCCCCCTAGATTGACCTATCTTCAGAGGAAGGGCGGGCTAAGTTCGTGCCAGCAGCCGCGGTAAGACGAACCGCCCAAACGTTATTCGGAATCACTGGGCTTAAAGGGTGCGTAGGCGGTGCGGAAAGTTGGGTGTGAAATCCCTCGGCTCAACCGAGGAACTGCGCCCAAAACTACCGCGCTAGAGGGAGGCAGGGGTGAGCGGAACTGATGGTGGAGCGGTGAAATGCGTTGATATCATCAGGAACACCGGTGGCGAAAGCGGCTCACTGGGTCTCTTCTGACGCTGA…
1ce919b55b5c18ff5e4a60f41004acbc	D_0__Bacteria;D_1__Proteobacteria;D_2__Alphaproteobacteria;D_3__Rickettsiales;D_4__Rickettsiaceae;D_5__uncultured;D_6__uncultured bacterium	TGGGGAATATTGGACAATGGGCGCAAGCCTGATCCAGCAATGCCGCGTGAATGATGAAGGCCTTAGGGTTGTAAAATTCTTTCAGTGGGGAAGAAAATGACGGTACCCACAGAAGAAGCTCCGGCTAACTCCGTGCCAGCAGCCGCGGTAATACGGAGGGAGCTAGCGTTTTTCGGAATTACTGGGCGTAAAGAGCGCGTAGGCGGTTAATTAAGTTGAAAGTGAAATCCCAAAGCTTAACTTTGGAACTGCTTTCAAAACTGATTAACTAGAGTTTGGTAGGGGATGATGGAATTCCTGGTGTAGAGGTGAAATTCTTAGATATCAGGAGGAACACCGGTGGCGAAGGCGATCATCTGGGCCATAACTGACGCTGAGGCGCGAAAGCGTGGGGAGCAA…
254dac84419bc67f1681a5988593f9ac	D_0__Bacteria;D_1__Spirochaetes;D_2__Leptospirae;D_3__Leptospirales;D_4__Leptospiraceae;D_5__RBG-16-49-21;D_6__uncultured bacterium	TTAAGAATCTTGCGCAATGGGGGCAACCCTGACGCAGCGACGCCGCGTGGATGATGAAGGCCTTCGGGTTGTAAAGTCTGGTAAGCAGGGAAGAATAAGCAATAGGTAATATTTATTGTGATGACGGTACCTGCCTAAAGCCCCGGCTAACTACGTGCCAGCAGCCGCGGTAATACGTATGGGGCAAGCGTTGTTCGGAATTATTGGGCGTAAAGGGCGTCTAGGCGGGAAAATAAGTTAGGTGTGAAAGCCATGGGCTCAACCCGTGAATTGCATCTAAAACTGTTTTTCTTGAGTTCGGGAGAGGAGTGCGGAATTCCAGGTGTAGCGGTGAAATGCGTAGATATCTGGAAGAACACCAGTGGCGAAGGCGGCACTCTGGCCTAGAACTGACGCTAA…
185f2ef5080365467098b3b04cb74a2a	D_0__Bacteria;D_1__Actinobacteria;D_2__Acidimicrobiia;D_3__Actinomarinales;D_4__uncultured;D_5__uncultured marine bacterium;D_6__uncultured marine bacterium	CAGGGAATATTGCACAATGGGCGAAAGCCTGATGCAGCGACACCGCGTGCGGGATGACGGCCTTAGGGTTGTAAACCGCTTTCGGGAGGGAAGAAAATGACGGTACCTCCTAAAGAAGCTCCGGCCAACTACGTGCCAGCAGCCGCGGTAATACGTAGGGAGCAAACGTTGTCCGGATTTATTGGGCGTAAAGGGCTCGTAGGCGGTTCAACAAGTCGGTCGTGAAAGCCCGGAGCTCAACTCCGGGAGGCCGGTCGAAACTGTTTTGCTTGAGTTCAGGAGGGGGGAGCGGAATTCCTAGTGTAGCGGTGAAATGCGTAGATACTAGGAGGAACACCGGTGGCGAAGGCGGCTCCCTGGACTGATACTGACACTGAGGTGGGAAAGCGTGGGTAGCAA…
6b41d7e54d3995c9ed7e1847ff03fe44	D_0__Bacteria;D_1__Planctomycetes;D_2__Planctomycetacia;D_3__Pirellulales;D_4__Pirellulaceae;D_5__uncultured	TCGAGAATCTTCCGCAATGGGCGCAAGCCTGACGGAGCGACGCCGCGTGCGGGATGAAGGCCTTCGGGTTGTAAACCGCTGTCAGAGGGGAGTAAGTGAAGGGGGTCATCCCCTGGATCTGAACTATCCTCAGAGGAAGGACGGGCTAAGTTCGTGCCAGCAGCCGCGGTAAGACGAACCGTCCAAACGTTATTCGGAATCACTGGGCTTAAAGGGTGCGTAGGCGGCTCTGCAAGTTGGGTGTGAAAGCCCACGGCTCAACCGTGGAATTGCGCTCAAAACTGCAGGACTGGAGGGAGATAGAGGTGAGCGGAACTTATGGTGGAGCGGTGAAATGCGTTGATATCATAAGGAACACCGGTGGCGAAAGCGGCTCACTGGGTCTCTTCTGACGCTGAG…
13567ad4659b6c56754d07cbfd41fa0d	D_0__Archaea;D_1__Nanoarchaeaeota;D_2__Woesearchaeia	GCGCGGAACCTTTACAATGCACGAAAGTGTGATAAGGGGATTCCAAGTGCTCAAGCTTTGCTTGGGCTTTTGCCAAGAGTAAATACCTTGGCGAATAAGTGGTGGGCAAGACTGGTGCCAGCAGCCGCGGTAACACCAGCGCCACGAGTGGCAGCCAGAATTATTGGGCCTAAAGCGTTCGTAGCCGGTTATGTAAATCTTTTGTGAAATTGTCGGGCTTAACCTGTCAGATTGCAGAAGACACTGCATAACTAGGGACCGGAAGGGGTTAGGAGTATTATCGGGGGAGCGGTAAAATGTTGTAATCCCGATAAGACTACCTGTGGCGAAGGCGCCTAACCAGGACGGATCCGACGGTGAGGAACGAAAGCTGGGGGAGCGATCC
177e08bf72de69e5aeb12cc59e06f246	D_0__Bacteria;D_1__Chloroflexi;D_2__Anaerolineae;D_3__Anaerolineales;D_4__Anaerolineaceae;D_5__uncultured;D_6__uncultured marine bacterium	TGAGGAATATTGCGCAATGGACGAAAGTCTGACGCAGCCATGCCGCGTGCAGGATGACGGCCCTACGGGTTGTAAACTGCTTTTTTACAGGAAGAACTCCCCCTACGTGTAGGGGGCTGACGGTACTGTATGAATAAGCATCGGCTAACTCCGTGCCAGCAGCCGCGGTAATACGTAGGAGGCGAGCGTTATCCGGATTTATTGGGCGTAAAGCGCGTGCAGGTGGTTTGGTAAGTTGGGTATGAAATCTCCTGGCTTAACTAGGAGAGGTTGCTCAAAACTACCAGACTAGAGGACGATAGAGGAAGGTGGAATTCCCGGTGTAGTAGTGAAATGCGTAGATATCGGGAGGAACACCAGTGGCGAAGGCGGCCTTCTGGGTCGTTCCTGACACTAAGA…
d4be372086cf2c2579a2227020f4e8f5	D_0__Bacteria;D_1__Planctomycetes;D_2__Planctomycetacia;D_3__Pirellulales;D_4__Pirellulaceae;D_5__Blastopirellula;D_6__uncultured Pirellula sp.	TCGAGAATCTTCCGCAATGGACGAAAGTCTGACGGAGCGACGCCGCGTGCGGGATGAAGGCCTTCGGGTTGTAAACCGCTGTCAGAGGGAAGCAAATTTTGAGCGATCCTCAGAGGAAGCACAGGCTAAGTTCGTGCCAGCAGCCGCGGTAATACGAACTGTGCAAACGTTATTCGGAATCACTGGGCTTAAAGGGTGCGTAGGCGGGTTTAAAGGTCTGATGTGAAAGCCCACGGCTCAACCGTGGAATTGCGTTGGAAACCATAAGCCTTGAGGGAGTCAGAGGTAAGCGGAACTGATGGTGGAGCGGTGAAATGCGTTGATATCATCAGGAACACCGGTGGCGAAAGCGGCTTACTGGGACTCTTCTGACGCTGAGGCACGAAAGCTAGGGGAGCG…
6ddd16b6da8ce444d71bc52be66b40df	D_0__Bacteria;D_1__Proteobacteria;D_2__Gammaproteobacteria;D_3__AT-s2-59	TGGGGAATATTGGACAATGGGGGCAACCCTGATCCAGCAATGCCGCGTGTGTGAAGAAGGCCTGCGGGTTGTAAAGCACTTTCAGTAGGGAAGAGGGTGGCCGAGTAACGATCGGTCATTGACGTTACCTACAGAAGAAGCACCGGCTAACTCCGTGCCAGCAGCCGCGGTAATACGGAGGGTGCGAGCGTTAATCGGAATTACTGGGCGTAAAGCGCGCGTAGGCGGTTTGGTCAGTCGGATGTGAAAGCCCCGGGCTTAACCTGGGAATTGCATTCGATACTGCCAAGCTAGAGTATGGGAGAGGGAAGTGGAATTTCCGGTGTAGCGGTGAAATGCGTAGATATCGGAAGGAACACCAGTGGCGAAGGCGACTTCCTGGCCCAAAACTGACGCTGA…
89d228812ce361c203b33454c03a108b	D_0__Bacteria;D_1__Bacteroidetes;D_2__Bacteroidia;D_3__Chitinophagales;D_4__Saprospiraceae;D_5__uncultured;D_6__uncultured Flavobacterium sp.	TAAGGAATATTGGACAATGGGGGCAACCCTGATCCAGCCATCCCGCGTGTAGGAAGGCTGCCCTATGGGTTGTAAACTACTTTTATCAGGGAAGAACAGTTGACATTTATGTTGGCATGACGGTACCTGAAGAATAAGCACCGGCTAACTCCGTGCCAGCAGCCGCGGTAATACGGAGGGTGCAAGCGTTATCCGGAATTACTGGGTTTAAAGGGTGCGTAGGCGGAACTATAAGTCAGAGGTGAAATCACACAGCTTAACTGTGTAACTGCCTTTGATACTGTAGATCTTGAATTAGGTTGAGGTTAGCGGAATGTGACATGTAGCGGTGAAATGCATAGATATGTCATAGAACACCAATTGCGAAGGCAGCTAGCTAGGCCTATATTGACGCTGAGG…
db827647a7cb9ef01d161927f4d1c4c5	D_0__Bacteria;D_1__Bacteroidetes;D_2__Bacteroidia;D_3__Chitinophagales;D_4__Saprospiraceae;D_5__uncultured;D_6__uncultured Bacteroidetes bacterium	TAAGGAATATTGGACAATGGGCGCAAGCCTGATCCAGCTATCCCGCGTGCAGGATGACGGCCCTATGGGTTGTAAACTGCTTTTATATAGGAAGAACAGTCTTCATTTACTGAGGATATGACGGTACTATATGAATAAGCACCGGCTAACTCCGTGCCAGCAGCCGCGGTAATACGGAGGGTGCAAGCGTTATCCGGAATTACTGGGTTTAAAGGGTGCGTAGGCGGCGGCATAAGTCAGAAGTGAAAGTTGGCAGCTTAACTGCAAAATTGCTTTTGATACTGTGTTGCTTGAATCACGTTGAGGCTGGCGGAATGTGGCATGTAGCGGTGAAATGCTTAGATATGCCATAGAACACCAATTGCGAAGGCAGCTGGCTAGACGTGTATTGACGCTGAG…
082f954eeabda479fa034273f2d6e509	D_0__Bacteria;D_1__LCP-89;D_2__uncultured bacterium;D_3__uncultured bacterium;D_4__uncultured bacterium;D_5__uncultured bacterium;D_6__uncultured bacterium	TGAGGAATATTGCACAATGGGGGTAACCCTGATGCAGCAACGCCGCGTGTACGAAGAATCAGAATACTGTGTAAAGTACTGTTAGAAGGGACGAAATGTCGGATTAGTAGTCTGACTTGCCGGTACCTTCTAAGAAAGCTCCGGCTAACTCCGTGCCAGCAGCCGCGGTAATACGGGGGGAGCAAGCGTTGTCCGGAATCATTGGGCGTAAAGGGTATGTAGGTTGTAATTTAAGTCAGTTTTTAAATGTCACGGCTTAACCGTGGACTGGAATTGAAACTGGATTACTTGAGTATGAGAGGGGACAGAGGAATACCTAGTGTAGCGGTGGAATGCGTAGATATTAGGTAGAACACCTGAGGCGAAGGCGTCTGTCTGGCTCATTACTGACACTGAAAT…
209f7d5bd3ad727c543295e6f68882bf	D_0__Bacteria;D_1__Planctomycetes;D_2__Planctomycetacia;D_3__Pirellulales;D_4__Pirellulaceae;D_5__uncultured;D_6__uncultured organism	TCGAGAATCTTCGGCAATGGGCGCAAGCCTGACCGAGCGACGCCGCGTGCGGGATGAAGGCCTTCGGGTTGTAAACCGCTGTCAGAGGGGAGGAAATGCATGAGGGTTCTCTCTCATGTTTGACCTATCCTCAGAGGAAGTACGGGCTAAGTTCGTGCCAGCAGCCGCGGTAATACGAACCGTACGAACGTTATTCGGAATCACTGGGCTTAAAGAGTGCGTAGGCGGCCAGGCAAGTTGGGTGTGAAATCCCTCGGCTCAACCGAGGAACTGCGCTCAAAACTGCTTGGCTTGAGAAAGATAGAGGTGAGCGGAACTAATGGTGGAGCGGTGAAATGCGTTGATATCATTAGGAACACCAGAGGCGAAAGCGGCTCACTGGGTCTTTTCTGACGCTGA…
7c253214f12e6da7734e7589e82af3a6	D_0__Bacteria;D_1__Bacteroidetes;D_2__Bacteroidia	TGAGGAATATTGGTCAATGGTCGAGAGACTGAACCAGCCATGCCGCGTGTAGGAAGAAGGTTCTATGAATTGTAAACTACTTTTATACAGGAAGAAACCACTCTACGTGTAGAGTGCTGACGGTACTGTACGAATAAGCACCGGCTAACTCCGTGCCAGCAGCCGCGGTAATACGGAGGGTGCAAGCGTTATCCGGAATCATTGGGTTTAAAGGGTGCGTAGGCGGTCTTATAAGTCAGAGGTGAAATCCCTACCGCTTAACGGAGGAATTGCCTTTGAAACTATAGGACTTGAAATAGTGTGACGTTGGCGGAATGAGTAGGGTAGCGGTGAAATGCATAGATATTACTCAGAGCACCGATTGCGAAGGCAGCTGACGAACATTCATTTGACGCTGAG…
cad8cad957d611c89a4c8998fcc6e9f8	D_0__Bacteria;D_1__Proteobacteria;D_2__Gammaproteobacteria;D_3__HOC36;D_4__uncultured sediment bacterium;D_5__uncultured sediment bacterium;D_6__uncultured sediment bacterium	TGGGGAATATTGGACAATGGGCGCAAGCCTGATCCAGCAATGCCGCGTGTGTGAAGAAGGCCTGCGGGTTGTAAAGCACTTTCAGTGGGGAAGAGGGTATGCGCGTAACGAGCGTATATTGACGTTACCCACAGAAGAAGCACCGGCTAACTCCGTGCCAGCAGCCGCGGTAATACGGAGGGTGCAAGCGTTAATCGGAATTACTGGGCGTAAAGCGCGCGTAGGCGGTTGAGTGAGTCAGATGTGAAAGCCCCGGGCTCAACCTGGGAATGGCATTTGATACTGCTTAGCTAGAGTCTGACAGAGGGTGGCGGAATTCCGGGTGTAGCGGTGAAATGCGTAGATATCCGGAGGAACACCGGTGGCGAAGGCGGCCACCTGGGTCAAGACTGACGCTGA…
8e7942eb4b4dd8e7564301d532981218	D_0__Bacteria;D_1__Proteobacteria;D_2__Gammaproteobacteria;D_3__Gammaproteobacteria Incertae Sedis;D_4__Unknown Family;D_5__uncultured;D_6__uncultured Pseudomonas sp.	TGGGGAATTTTCCGCAATGGGCGAAAGCCTGACGGAGCAATACCGCGTGAGGGATGACGGCCTATGGGTTGTAAACCTCTTTTTTCAGGGAGGAATCAATGACGTTACCTGAAGAATAAGGACCGGCTAACTCAGTGCCAGCAGCCGCGGTAATACTGAGGGTCCAAGCGTTAATCGGAATTACTGGGCGTAAAGCGAGTGTAGGCGGCTTCGTAAGTCGGATGTGAAAGCCCTGGGCTTAACCTGGGAATGGCATTCGATACTGCGCGGCTAGAGTCTGATAGAGGGATGTGGAATTCCAGGTGTAGCGGTGAAATGCGTAGAGATCTGGAGGAACACCAGTGGCGAAGGCGGCATCCTGGATCAAGACTGACGCTGAGGCTCGAAAGCGTGGGGAGC…
ad87e054c2e4ad761c239f9f9872e11e	D_0__Bacteria;D_1__Planctomycetes;D_2__Planctomycetacia;D_3__Pirellulales;D_4__Pirellulaceae;D_5__uncultured;D_6__uncultured bacterium	TCGAGAATCTTCGGCAATGCGCGCAAGCGTGACCGAGCGACGCCGCGTGTGGGATGAAGGCCTTCGGGTTGTAAACCACTGTCAGTTGGGAGGAAATCCATAGGGGTTATCCCCTATGGTTGACCTATCATCAGAGGAAGGACGGGCTAAGTTCGTGCCAGCAGCCGCGGTAAGACGAACCGTCCAAACGTTATTCGGAATCACTGGGCTTAAAGGGTGCGTAGGCGGTCCTGCAAGTTGGGTGTGAAAGCCCTCGGCTCAACCGAGGAATTGCGCCCAAAACTGCAGGGCTAGAGGGAGACAGAGGTGAGCGGAATTCCCGGTGTAGCGGTGGAATGCGTAGATATCGGGAAGAACGCCAGTGGCGAAGGCGGCTCGCTGGGCCTTTTCTGACGCTGA…
d9be76e7fc481c3f060ae0f62f9d6f74	D_0__Bacteria;D_1__Spirochaetes;D_2__Spirochaetia;D_3__Spirochaetales;D_4__Spirochaetaceae;D_5__uncultured;D_6__uncultured organism	TTAAGAATCTTGCGCAATGGGCGAAAGCTTGACGCAGCGACGCCGCGTGGACGATGAAGGTCTTCGGATTGTAAAGTCCAGTAAGCAGGGAAGAATAAGCAGTAGGTAATATCTGCTGTGATGACGGTACCTGCCTAAAGCCCCGGCTAACTACGTGCCAGCAGCCGCGGTAATACGTATGGGGCGAGCGTTGTTCGGAATTATTGGGCGTAAAGGGCGTGTAGGCGGTGTGGTAAGTCGGATGTGAAATCTCCAGGCTCAACCTGGAAACTGCATTCGAAACTGCCATGCTTGAGTACCGGAGAGGGAAACGGAATTCCTGGTGTAGGGGTGAAATCTGTAGATATCAGGAAGAACACCGGTGGCGAAGGCGGTTTCCTGGCCGGATACTGACGCTGA…
432ca8829ca23d443d4b515207d8b7e9	D_0__Bacteria;D_1__Chloroflexi;D_2__Anaerolineae;D_3__Anaerolineales;D_4__Anaerolineaceae;D_5__uncultured;D_6__uncultured Chloroflexi bacterium	TAAGGAATATTGCGCAATGGACGAAAGTCTGACGCAGCAACGCCGCGTGCGGGAAGAAGGTCTTCGGATCGTAAACCGCTTTTCTGCGGGAAGAGAAAGGACGGTACCGCAGGAATAAGTCTCGGCTAACTACGTGCCAGCAGCCGCGGTAAAACGTAGGAGGCGAACGTTATCCGAATTTACTGGGCGTAAAGCGCGTGTAGGCGGCCGGGTAAGTTGGACGTGAAAGCTCCTGGCTCAACTAGGAGAGGTCGTTCAAAACTGCCTGGCTAGAGGGCGACAGAGGGAGGTGGAATTCCCGGTGTAGTGGTGAAATGCGTAGATATCGGGAGGAACACCAGTGGCGAAGGCGGCCTCCTGGGTCGCTCCTGACGCTCAGACGCGAAAGCTAGGGGAGCG…
09bcb5c776f91accdbf724e35c828240	D_0__Bacteria;D_1__Actinobacteria;D_2__Acidimicrobiia;D_3__Actinomarinales;D_4__uncultured;D_5__uncultured actinobacterium;D_6__uncultured actinobacterium	CAGGGAATATTGCACAATGGGCGAAAGCCTGATGCGGCGACGCCGCGTGCGGGATGAAGGCCTTCGGGTTGTAAACCGCTTTCAGGAGGGACGAAAATGACGGTACCTCCAGAAGAAGGCCCGGCCAACTACGTGCCAGCAGCCGCGGTAATACGTAGGGGCCAAGCGTTGTCCGGATTTATTGGGCGTAAAGGGCTCGTAGGCGGTTTAGTAAGTCAATCGTGAAATGTCGGGGCTCAACCCCGAGACTGCGGTCGAAACTGCTATGACTAGGGTCCGGTAGAGGTGAGTGGAATTCTCGGTGTAGCGGTGAAATGCGCAGATATCGAGAGGAACACCAGTAGCGAAGGCGGCTCACTGGGCCGGTACCGACGCTGAGGAGCGAAAGCGTGGGGAGCA…
013907eb7a51811093b6a8d4a7596ec0	D_0__Bacteria;D_1__Bacteroidetes;D_2__Rhodothermia;D_3__Rhodothermales;D_4__Rhodothermaceae;D_5__uncultured;D_6__uncultured Cytophaga sp.	TGAGGAATATTGCGCAATGGGCGAAAGCCTGACGCAGCCACGCCGCGTGAAGGATGACACCCCTCTGGGGCGTAAACTTCTTTTATGTGAGAAGAAGGCCTTGGTCTCCAAGGTTTGACGGTATCATATGAATAAGCACCGGCTAACTCCGTGCCAGCAGCCGCGGTAATACGGAGGGTGCAAGCGTTGTCCGGAATCACTGGGTGTAAAGGGTGTGTAGGCGGGACAGTAAGTCAGAGGTGAAATCCCACGGCTCAACCGTGGAACTGCCTTTGATACTGCTGTTCTTGAGTCTCGGAGGGGTTGCTGGAATTCGTGGTGTAGCGGTGAAATGTGTAGATATCACGAGGAACACCAGAGGCGTAGGCGGGCAACTGGACGAGTACTGACGCTGAGGCA…
bc909be0b3ebb045f351fa4513ed2569	D_0__Bacteria;D_1__Cyanobacteria;D_2__Oxyphotobacteria;D_3__Chloroplast	TGGGGAATTTTCCGCAATGGGCGAAAGCCTGACGGAGCAATACCGCGTGAGGGAAGACTGCCTATGGGTTGTAAACCTCTTTTTTCAGGGAGGAATAAAATGACGTGTACCTGAAGAATAAGCATCGGCTAACTCCGTGCCAGCAGCCGCGGTAAGACGGAGGATGCAAGTGTTATCCGGAATCACTGGGCGTAAAGCGTCTGTAGGTGGTTTAATAAGTCAACTGTTAAATCTTGAGGCTCAACCTCAAAATCGCAGTCGAAACTATTAGACTAGAGTATAGTAGAGGTAAAGGGAATTTCCAGTGGAGCGGTGAAATGCGTAGATATTGGAAAGAACACCGATGGCGAAAGCACTTTACTGGGCTATTACTAACACTCAGAGACGAAAGCTAGGGTA…
bbce939f8d7c48155b7894424ef5569a	D_0__Bacteria;D_1__Bacteroidetes;D_2__Bacteroidia;D_3__Flavobacteriales	TGAGGAATATTGCGCAATGGACGAAAGTCTGACGCAGCCATACCGCGTGCAGGAAGACGGCCCTACGGGTTGTAAACTGCTTTTGTTTGCCAAGAAACCCACCTACGTGTAGGTGGCTGACGGTAGCATTCGAATAAGCACCGGCTAACTCCGTGCCAGCAGCCGCGGTAATACGGAGGGTGCAAGCGTTATCCGGATTTATTGGGTTTAAAGGGTTCGTAGGCGGGATATTAAGTCAGTGGTGAAATCCTACAGCTTAACTGTAGAACTGCCATTGATACTGATATTCTTGAATTCACCTGAAGTAGGCGGAACATGACATGTAGCGGTGAAATGCTTAGATATGTCATAGAACACCGATTGCGAAGGCAGCTTACTAAAGTGATATTGACGCTAAGG…
040d66468b29eb55a1b81e8cf8b32b5f	D_0__Archaea	TTACGAAACCTCACCAATGCGCGAAAGCGTGAGTGGGCCAAGCCGAGTGATGGGGGATAACTCCATCTGTGGCAAATCCGTATGATGGATTGCTAGAAAGGAGAGGGCAAGGCTGGTGCCAGCCGCCGCGGTAAAACCAGCTCTTCGAGTGGTGTCCATGATTATTGAGCTTAAAGCGTTCGTAGCCTGTTTGGTAGGTCCCTGCTTAAATCCGGCCGCTCAACGGTCGGCCTGGTAGGGATACCGCCTTACTTGGGGACGGGAGACGGCGACGGTATTCCGTAGGTAAGGGTGAAATCTAATGATCTACGGAGGACCACCAGTGGCGAAGGCGGTCGTCGAGAACGTGCCCGACGGTGAGGGACGAAACCCAGGGGAGCGAATC
37c0bab4cd255e9fa08ab6e7b3413599	D_0__Bacteria;D_1__Actinobacteria;D_2__Actinobacteria;D_3__Frankiales;D_4__Acidothermaceae;D_5__Acidothermus;D_6__uncultured Thermomonosporaceae bacterium	TGGGGAATATTGCGCAATGGGCGAAAGCCTGACGCAGCGACGCCGCGTGGGGGATGAAGGCCTTCGGGTTGTAAACCCCTTTCAGCAGGGACGAAGCGAAAGTGACGGTACCTGCAGAAGAAGCGCCGGCTAACTACGTGCCAGCAGCCGCGGTAACACGTAGGGCGCAAGCGTTGTCCGGAATTATTGGGCGTAAAGAGCTCGTAGGCGGTCTGCTACGTCCGCTGTGAAAACCTAGGGCTTAACCCTGGGCTTGCAGTAGATACGGGCAGACTAGAGGTAGGTAGGGGAGAATGGAATTCCCGGTGTAGCGGTGAAATGCGCAGATATCGGGAGGAACACCGGTGGCGAAGGCGGTTCTCTGGGCCTTACCTGACGCTGAGGAGCGAAAGCGTGGGG…
901f1ebd87ba1b9117ba71f0936024c6	D_0__Bacteria;D_1__Proteobacteria;D_2__Alphaproteobacteria;D_3__Kordiimonadales;D_4__uncultured;D_5__uncultured bacterium;D_6__uncultured bacterium	TGGGGAATATTGTACAATGGGCGCAAGCCTGATACAGCAATGCCGCGTGAGTGAAGAAGGCCTTAGGGTTGTAAAACTCTTTCGCCAGGGAAGATAATGACGGTACCTGGTAAAGAAGTCCCGGCTAACTCCGTGCCAGCAGCCGCGGTAATACGGAGGGGACTAGCGTTGTTCGGAATTACTGGGCGTAAAGAGTTCGTAGGCGGATAAGCAAGTAAGAGGTGAAAGCCCAGGGCTCAACCCTGGAACTGCCTTTTAAACTGCTTATCTAGAGACCGGTAGAGGTTAGGGGAATACCTAGTGTAGAGGTGAAATTCGTAGATATTAGGTGGAACACCAGTGGCGAAGGCGCCTAACTGGACCGGTACTGACGCTGAGGAACGAAAGCGTGGGGAGCAA…
c4b1365a55f5d555c8aa8ae84ddbd2fc	D_0__Bacteria;D_1__Actinobacteria;D_2__Actinobacteria;D_3__Corynebacteriales;D_4__Mycobacteriaceae;D_5__Mycobacterium	CGGGGAATATTGCACAATGGGCGCAAGCCTGATGCAGCGACGCCGCGTGAGGGATGACGGCCTTCGGGTTGTAAACCTCTTTCACCAGGGACGAAGCGCAAGTGACGGTACCTGGAGAAGAAGCACCGGCCAACTACGTGCCAGCAGCCGCGGTAATACGTAGGGTGCGAGCGTTGTCCGGAATTACTGGGCGTAAAGAGCTCGTAGGTGGTTTGTCGCGTTGTTCGTGAAAACTCACAGCTTAACTGTGGGCGTGCGGGCGATACGGGCAGACTAGAGTACTGCAGGGGAGACTGGAATTCCTGGTGTAGCGGTGGAATGCGCAGATATCAGGAGGAACACCGGTGGCGAAGGCGGGTCTCTGGGCAGTAACTGACGCTGAGGAGCGAAAGCGTGGGG…
7a895637503dbec92c42a87f27f041dc	D_0__Bacteria;D_1__Planctomycetes;D_2__Planctomycetacia;D_3__Pirellulales;D_4__Pirellulaceae;D_5__uncultured;D_6__uncultured organism	TCGAGAATCTTCGGCAATGGGCGCAAGCCTGACCGAGCGACGCCGCGTGCGGGATGAAGGCCTTCGGGTTGTAAACCGCTGTCAGAGGGGAGGAAATGCATGGGGGTTCTCCTTCATGTTTGACCTATCCTCAGAGGAAGTACGGGCTAAGTTCGTGCCAGCAGCCGCGGTAATACGAACCGTACGAACGTTATTCGGAATCACTGGGCTTAAAGAGTGCGTAGGCGGCTTGGTAAGTTGGATGTGAAATCCCTCGGCTCAACCGAGGAACTGCGTTCAATACTGCCAAGCTTGAGGGGGATAGGGGTGAGCGGAACTAATGGTGGAGCGGTGAAATGCGTTGATATCATTAGGAACACCGGAGGCGAAGGCGGCTCACTGGGTCTCTTCTGACGCTGA…
11b5a90a0b7d3b4b925ea1d8da629f47	D_0__Bacteria;D_1__Actinobacteria;D_2__Acidimicrobiia;D_3__Microtrichales;D_4__Microtrichaceae;D_5__Sva0996 marine group	TGGGGAATCTTGCGCAATGGGCGAAAGCCTGACGCAGCAACGCCGCGTGGGGGAAGAAGGCTCTCGGGTCGTAAACCCCTTTCAGCAGGGACGAAAATGACGGTACCTGCAGAAGAAGGACCGGCCAACTACGTGCCAGCAGCCGCGGTAATACGTAGGGTCCAAGCGTTGTCCGGATTTATTGGGCGTAAAGAGCTCGTAGGCGGTTTGGTAAGTCGGGTGTGAAAACTCAGGGCTCAACCCTGAGACGCCACTCGATACTGCCATGACTAGAGTCCGGTAGGGGAGTGTGGAATTCCTGGTGTAGCGGTGAAATGCGCAGATATCAGGAGGAACACCAACAGCGAAGGCAGCACTCTGGGCCGGTACTGACGCTGAGGAGCGAAAGCATGGGGAGCA…
8b32ae3e0db20eae2924d1e5dfd590d5	D_0__Archaea;D_1__Nanoarchaeaeota;D_2__Woesearchaeia;D_3__uncultured archaeon;D_4__uncultured archaeon;D_5__uncultured archaeon;D_6__uncultured archaeon	GCGCGAAACCTTTACAATGCACGAAAGTGTGACAGGGGGAATCAAAGTGCTCATGTTTTCATGGGCTTTTGCCAAGTCAAAACTGCTTGGCGAATAAGTGGTGGGAAAGACTGGTGCCAGCCGCCGCGGTAACACCAGCGCCACAAGTGGGAACCGTTTTTATTTGGTCTAAAGCGTCCGTAGCGGGCCTTGTAAATTACTTGTGAAATCGTATAGCTTAACTATACGGACTGCAGGTAAGACTGCAAGGCTAGAGATCGGGAGACGTTGGAAGTATTCGAGGGGGAGCGGTAAAATGCGAGAATCCTTCGAGGACTACCTGTTGCGAAGGCGTCCAACAATAACGAGTCTGACCGTGAGGGACTAAAGCTAGGGGAGCGAACC
536ae304f3fbdd8b37073987d6fef91b	D_0__Bacteria;D_1__Proteobacteria;D_2__Deltaproteobacteria;D_3__Myxococcales;D_4__Sandaracinaceae;D_5__uncultured	TGGGGAATATTGGACAATGGGGGCAACCCTGATCCAGCCATGCCGCGTGCGTGAAGAAGGCCTTAGGGTTGTAAAGCGCTTTCACCGGTGACGATGATGACGGTAGCCGGAGAAGAAGCCCCGGCTAACTCCGTGCCAGCAGCCGCGGTAATGCAGAGGGTGCAAACGTTGCTCGGATTTACTGGGCGTAAAGCGCGTGTAGGCGGACTCGCAAGTCGGTTGTGAAATCCCTGGGCTCAACCTAGGAACTGCATCCGAAACTGCTTGTCTTGAGTAATGGAGAGGGTGGCGGAATTCCCGGTGTAGAGGTGAAATTCGTAGATATCGGGAGGAACATCAGTGGCGAAGGCGGCCACCTGGACATTTACTGACGCTGAGACGCGAAAGCGTGGGGAGCAA…
b90c3d83ae347db1bdf8cd8f3dae6a17	D_0__Bacteria;D_1__Proteobacteria;D_2__Deltaproteobacteria;D_3__Bradymonadales;D_4__uncultured bacterium;D_5__uncultured bacterium;D_6__uncultured bacterium	TGGGGAATCTTGCGCAATGGGCGAAAGCCTGACGCAGCAACGCCGCGTGTGTGATGAAGGCCTTAGGGTCGTAAAGCACTGTCAGGGGGGAAGAATTTTGACGGTACCCCCAAAGGAAGCACCGGCTAACTCCGTGCCAGCAGCCGCGGTAATACGGAGGGTGCAAGCGTTGTTCGGAATCATTGGGCGTAAAGCGCGCGCAGGTGGCTTATTAAGTCTGGTGTGAAAGCCCAGGGCTCAACCCTGGAACTGCATTGGAAACTGATGAGCTTGAGTCCAAGAGGGGTCTGTAGAATTCCTGGTGTAGGGGTGAAATCCGTAGAGATCAGGAGGAATACCGGTGGCGAAGGCGACAGACTGGATTGGAACTGACACTGAGGCGCGAAAGTGTGGGGAGCA…
cc0375eb887248c8afe10e1b5096f6f4	D_0__Bacteria;D_1__Chloroflexi;D_2__Anaerolineae;D_3__SBR1031	CAGGGAATATTGCACAATGGACGCAAGTCTGATGCAGCGACGCCGCGTGGATGAAGACGGCCTTCGGGTTGTAAAATCCTTTTAGTGGGGAAGAGGAAGGACGGTACCCACAGAATAAGTGTCGGCTAACTACGTGCCAGCAGCCGCGGTAATACGTAGGACACGAGCGTTATCCGGATTTACTGGGCGTAAAGCGTCTGTAGGCGGTTATGTAAGTTGGGCGTGAAAGCTCCGGGCTTAACCCGGAGAGGCCGTTCAATACTGCGTGACTAGAGGGCGAGAGAGGGGAGCGGAATTCCTGGTGTAGCGGTAAAATGCGCAGATATCAGGAGGAACACCAGTGGCGTAGGCGGCTCCCTGGATCGCAACTGACGCTGAGAGACGACAGCTAGGGGAGCG…
707b87dd3b7dac8c1357d7d46750bc71	D_0__Bacteria;D_1__Planctomycetes;D_2__Phycisphaerae;D_3__CCM11a;D_4__uncultured bacterium;D_5__uncultured bacterium;D_6__uncultured bacterium	TGGGGAATATTGGACAATGGGGGCAACCCTGATCCAGCAATGCCGCGTGTGTGAAGAAGTCCCTCGGGATGTAAACTGCTGTCAGGGGTTAGGAATAACTGACCAGCCCCAAAGGAAGCACTGGCTAACTCCGTGCCAGCAGCCGCGGTAATACGGAGAGTGCAAGCGTTGTTCGGAATTACTGGGCTTAAAGGGCGTGCAGGCGGAAAAGCAAGTGTCGGGTGAAAGCCCTCGGCTCAACCGGGGAATTGCCAGGCAAACTGCTTTTCTTGAGGCAGGTAGAGGTGAGTGGAACAACTGGTGGAGCGGTGAAATGCGTAGATATCAGTTGGAACGCCGGTGGCGAAAGCGGCTCACTGGACCTGTCCTGACGCTGAGACGCGAAAGCGTGGGTAGCGA…
eecd777e28a2232c9edc5d386477d6e0	D_0__Bacteria;D_1__Proteobacteria;D_2__Deltaproteobacteria;D_3__Bdellovibrionales;D_4__Bdellovibrionaceae;D_5__OM27 clade;D_6__uncultured bacterium	TGGGGAATATTGCGCAATGGGGGAAACCCTGACGCAGCCACGCCGCGTGTGTGATGAAGGCCTTCGGGTCGTAAAGCACTGTCGGGAGGGAAGAAGATCTGACGGTACCTCCCAAGAAAGCACCGGCTAACTCCGTGCCAGCAGCCGCGGTAATACGGAGGGTGCAAGCGTTGCTCGGAATCACTGGGCGTAAAGCGCACGCAGGCGGATTTGCAGGTCGGATGTGAAAGCCCGGGGCTCAACCCCGGAACTGCATTCGAAACCGCAGGTCTTGAATACGAGAGAGGGAAGCGGAATTCCTGGTGTAGAGGTGAAATTCGTAGATATCAGGAGGAACACCGGTGGCGAAAGCGGCTTCCTGGCTCGATATTGACGCTCATGTGCGAAAGCGTGGGGAGC…
5a54608a22139c174abbc94a287c65b6	D_0__Bacteria;D_1__BRC1	TCTAGAAGCTTCGTCAATGGGCGAAAGCCTGAACGAGCGACGCCGCGTGTGGGATTGAAGGCCTTACGGTCGTAAACCACTGTCAGAAGGGAAGAACGCCTGGATGGTGAATCCAGGTTTGACGGTACCTTCAGAGGAAGCCCCGGCTAACTCCGTGCCAGCAGCCGCGGTAATACGGAGGGGGCAAGCGTTATTCGGATTTACTGGGCGTAAAGGGTGCGTAGGCGGCTCCGCAAGTCTGGTGTGAAATCTTCACCGCTCAACGGGAAGAGGTCACTGGAAACTGCGGGACTTGAGCATGGTAGAGGTAAGCGGAATTCCTGGTGTAGCGGTGGAATGTGTAGATATCAGGAAGAACACCGGTGGCGAAGGCGGCTTACTGGGCCATTGCTGACGCTG…
94b5e9314b55010b1064902ff7ad31db	D_0__Bacteria;D_1__Patescibacteria;D_2__Gracilibacteria;D_3__Candidatus Peregrinibacteria;D_4__uncultured organism;D_5__uncultured organism;D_6__uncultured organism	TAAAGAATCTTCCGCAATGGACGAAAGTCTGACAGAGCGACACCGCGTGGTGGATGACGGCCCTTGGGTTGTAAACACCTTTTCTGGGGGAAGAAGTTCTGACGGTACCCCAGGAATAAGCATCGGCTAACTACGTGCCAGCAGCCGCGGTAATACGTAGGATGCAAGCGTTATCCGGAATCATTGGGCGTAAAGCGTTCGTAGGCTGTTTGTTAAGTTAGGGATAAAATCTCTGGGCTCAACCCAGATCTTGTTCTTAAAACTGGCAAACTTGAGTAAGGTAGAGGCTGACGGAATTCTGCAAGTAGGGGTAAAATCCGTTGATCTGCAGAGGAACACCAAAAGCGAAGGCAGTCAGCTGGGCCTTTACTGACGCTGAGGAACGAAAGCGTGGGGAGC…
4ee78f9a57c424159a6c27632a77efcd	D_0__Bacteria;D_1__Planctomycetes;D_2__Planctomycetacia;D_3__Pirellulales;D_4__Pirellulaceae;D_5__Blastopirellula;D_6__uncultured bacterium	TCGAGAATCTTCCGCAATGGACGCAAGTCTGACGGAGCGACGCCGCGTGCGGGATGAAGGCCTTCGGGTTGTAAACCGCTGTCAGTGGGGTGGAAATGCATGAGGGCTATCCCTCATGTTTGACCTAACCGCAGAGGAAGTCCGGGCTAAGTACGTGCCAGCAGCCGCGGTAATACGTACCGGACAAACGTTATTCGGAATCACTGGGCTTAAAGAGTGCGTAGGCGGCTTTGTAGGTGGGGTGTGAAAGCCCACGGCTCAACCGTGGAATTGCGCTCCAAACCGCAGGGCTCGAGGGAGACAGGGGTGAGCGGAACTGATGGTGGAGCGGTGAAATGCGTTGATATCATCAGGAACACCGGTGGCGAAGGCGGCTCACTGGGTCTCTTCTGACGCTGA…
4359d0a6a57329e0785509e1d5a23f7e	D_0__Bacteria;D_1__Actinobacteria;D_2__Acidimicrobiia;D_3__Actinomarinales;D_4__uncultured	CAGGGAATATTGCACAATGGGCGAAAGCCTGATGCAGCAACGCCGCGTGCGGGATGAAGGCCTTCGGGTTGTAAACCGCTTTCAGTAGGGAAGAAAATGACGGTACCTACAGAAGAAGCCCCGGCCAACTACGTGCCAGCAGCCGCGGTAACACGTGGGGGGCAAGCGTTGTCCGGATTTATTGGGCGTAAAGGGCTCGTAGGCGGCTTGACAAGTCGGGCGTGAAAACCCGGGGCTTAACCCCGGGACGCCGTTCGAAACTGTCATAGCTAGTTTCCGGTAGAGGTGAGTGGAATTCTCGGTGTAGCGGTGAAATGCGCAGATATCGAGAGGAACACCAGTAGCGAAGGCGGCTCACTGGGCCGGTAAAGACGCTGAGGAGCGAAAGCGTGGGGAGCA…
135027302fc45efe5cc940b4e3d7c113	D_0__Bacteria;D_1__Acidobacteria;D_2__Aminicenantia;D_3__Aminicenantales;D_4__uncultured bacterium;D_5__uncultured bacterium;D_6__uncultured bacterium	TGGGGAATTTTGCGCAATGGGCGAAAGCCTGACGCAGCGACGCCGCGTGGAGGATTAAGGCCTTCGGGTTGTAAACTCCTGTCAGAGGTGAAGAAAGTCTCCTTCGGGAGGCCTGACGGTAACCTCAGAGGAAGCCCCGGCTAACTACGTGCCAGCAGCCGCGGTAATACGTAGGGGGCTAACGTTGCTCGGAATTACTGGGCGTAAAGGGTGTGTAGGTGGCTGTGCAAGTCATTGATGAAATCCCGAGGCTCAACCTCGGAATTGTCTCTGAAACTGCACAGCTTGAGGATATTTGAGGAAAACGGAATTCCCGGTGGAGCGGTGAAATGCGTAGATATCGGGAGGAACACCAGAGGCGAAGGCGGTTTTCTAGAATATTCCTGACACTGAGACACG…
db40e670228ef3a74681faa64141120e	D_0__Bacteria;D_1__Actinobacteria;D_2__Acidimicrobiia;D_3__Microtrichales;D_4__Ilumatobacteraceae;D_5__Ilumatobacter	TGGGGAATCTTGCACAATGGGCGAAAGCCTGATGCAGCAACGCCGCGTGCGGGATGACAGCCCTAGGGTTGTAAACCGCTTTCAGCAGGGAAGAAAATGACGGTACCTGCAGAAGAAGGTGCGGCCAACTACGTGCCAGCAGCCGCGGTAACACGTAGGCATCAAGCGTTATCCGGATTTATTGGGCGTAAAGAGCTCGTAGGCGGTTCGGTAAGTCGGATGTGAAAACTCTGGGCTCAACCCAGAGAGGCCATTCGATACTGCTGTGACTAGAGTGCGGTAGGGGAGCGGGGAATTCCTGGTGTAGCGGTGAAATGCGCAGATATCAGGAGGAACACCAGCGGCGAAGGCGCCGCTCTGGGCCGTAACTGACGCTGAGGAGCGAAAGCATGGGTAGCA…
506e8375033aff8da78f9d4164b9d31b	D_0__Bacteria;D_1__Cyanobacteria;D_2__Oxyphotobacteria;D_3__Chloroplast;D_4__Epipyxis sp. PR26KG;D_5__Epipyxis sp. PR26KG;D_6__Epipyxis sp. PR26KG	TAAGGGATATTCCGCAATGGGCGAAAGCCTGACGGAGCAATACCGCGTGAGGGATGACGGCCTACGGGTTGTAAACCTCTTTTCTCAAGGAGGAAGAACTGACGTTACTTGAGGAATAAGCGACGGCTAACCCTGTGCCAGCAGCCACGGTAATACAGGGGTCGCAAGTTTTATTCGGAATTATTGGGCGTAAAGCGTCTGCAGGTTGACATAAAAGTCTTTTGTTAAATATCAGAGCTCAACTCGGAATCTGCAAAAGATACTATATGTCTTGAGTATGGTAGAGGTAGGGGGAATTTCCAGTGGAGCGGTGAAATGCGTAGATATTGGAAAGAACACCGATAGCGAAGGCACCCTACTGGGCCATTACTGACACTCAGAGACGAAAGCTAGGGGAGC…
3dd783bfdb92c1c0f4f733836b98a16f	D_0__Bacteria;D_1__Bacteroidetes;D_2__Bacteroidia;D_3__Bacteroidales;D_4__Bacteroidetes BD2-2	TGAGGAATATTGGTCAATGGGCGAAAGCCTGAACCAGCCATGCCGCGTGCAGGAAGACGGCTCTACGAGTTGTAAACTGCTTTTATACGGGAATAACCATAGTTACGTGTAACTATCTGAATGTACCGTACGAATAAGCACCGGCTAACTCCGTGCCAGCAGCCGCGGTAATACGGAGGGTGCAAGCGTTATCCGGATTTATTGGGTTTAAAGGGTGCGTAGGCGGAAATATAAGTCAGTGGTGAAATCTTGCAGCTTAACTGTAAAACAGCCATTGATACTGTGTTTCTTGAATATAGTTGAGGTAGGCGGAATGTGTAATGTAGCGGTGAAATGCTTAGATATTACACAGAACACCGATTGCGTAGGCAGCTTACTAAGCTATTATTGACGCTGAGG…
fd43cc132736605f8611f12ea7b8ea54	D_0__Bacteria;D_1__Bacteroidetes;D_2__Bacteroidia;D_3__Flavobacteriales;D_4__Cryomorphaceae;D_5__uncultured	TGAGGAATATTGCACAATGGACGAAAGTCTGATGCAGCCATGCCGCGTGCAGGATGAATGCCCTATGGGTTGTAAACTGCTTTTATATAGGAAGAAACCATTCTACGTGTAGAGTGTTGACGGTACTATAAGAATAAGGACCGGCTAACTCCGTGCCAGCAGCCGCGGTAATACGGAGGGTCCAAGCGTTATCCGGATTCATTGGGTTTAAAGGGTCCGTAGGCGGGAAAATAAGTCAGTGGTGAAAGCCTACAGCTTAACTGTAGAACTGCCATTGAAACTGTTTTTCTTGAATTTAGATGAAGTGGGCGGAATATATCATGTAGCGGTGAAATGCATAGATATGATATAGAACACCGATTGCGAAGGCAGCTCACTAAACTAATATTGACGCTGAGG…
99a3b8b149855a47d45ce54d3c86f795	D_0__Bacteria;D_1__Proteobacteria;D_2__Gammaproteobacteria;D_3__Cellvibrionales;D_4__Halieaceae;D_5__OM60(NOR5) clade;D_6__uncultured sediment bacterium	TCGAGAATCTTCGGCAATGGACGAAAGTCTGACCGAGCGACGCCGCGTGCGGGATGAAGGCCCTCGGGTTGTAAACCGCTGTCAGTTTGGAGGAAAGATCTGTGAAGAGCAGATCTTGACCGATATTCAGAGGAAGGACCGGCTAACTCCGTGCCAGCAGCCGCGGTAATACGGAGGGTGCGAGCGTTAATCGGAATTACTGGGCGTAAAGCGCGCGTAGGCGGTTGTTTAAGTCGGATGTGAAAGCCCTGGGCTCAACCTGGGAACTGCATTCGATACTGGGCAACTAGAGTATGAAAGAGGGAGGTAGAATTCCATGTGTAGCGGTGAAATGCGTAGATATGTGGAGGAATACCAGTGGCGAAGGCGGCCTCCTGGTTCAATACTGACGCTGAGGTG…
4be76d9e08047077d34a71901ac3d025	D_0__Bacteria;D_1__Epsilonbacteraeota;D_2__Campylobacteria;D_3__Campylobacterales;D_4__Sulfurovaceae;D_5__Sulfurovum	TGGGGAATATTGCACAATGGAGGAAACTCTGATGCAGCAACGCCGCGTGGAGGATGACGCATTTCGGTGTGTAAACTCCTTTTATATGGGAAGATAATGACGGTACCATATGAATAAGCACCGGCTAACTCCGTGCCAGCAGCCGCGGTAATACGGAGGGTGCAAGCGTTACTCGGAATCACTGGGCGTAAAGCGCGCGCAGGCGGCCATTTAAGTTGGATGTGAAAGCCTACGGCTCAACCGTAGAACTGCATCCAAAACTATTTGGCTAGAGTGTGGGAGAGGAAGATGGAATTAGTTGTGTAGGGGTAAAATCCGTAGAGATAACTAGGAATACCAAAAGCGAAGGCAATCTTCTGGAACACTACTGACGCTGAGGCGCGAAAGCGTGGGGAGCAA…
2187a7fa10df665133483e0bb3bff75b	D_0__Bacteria;D_1__Firmicutes;D_2__Clostridia;D_3__Clostridiales;D_4__Clostridiaceae 1;D_5__uncultured;D_6__bacterium enrichment culture clone KWE30-10	TGGGGAATATTGCGCAATGGACGAAAGTCTGACGCAGCAACGCCGCGTGGGTGATGAAGGTCTTCGGATTGTAAAGCCCTGTCTTCGAGGACGATAATGACGGTACTCGAGGAGGAAGCCACGGCTAACTACGTGCCAGCAGCCGCGGTAATACGTAGGTGGCAAGCGTTGTCCGGATTTACTGGGCGTAAAGAGTGTGTAGGCGGATAATTAAGTCAGGTGTGAAATCCCGAGGCTCAACCTCGGAGGTGCATTTGATACTGGTTGTCTAGAGTGCAGGAGAGGAGAGTGGAATTCCTAGTGTAGCGGTGAAATGCGTAGAGATTAGGAAGAACACCAGTGGCGAAGGCGACTCTCTGGACTGTAACTGACGCTGAGACACGAAAGCGTGGGGAGCAA…
d68bbd485c4c5bda3879b789342f7aba	D_0__Bacteria;D_1__Planctomycetes;D_2__OM190	TCGAGAATCTTCCGCAATGGGCGAAAGCCTGACGGAGCGACACCGCGTGCAGGATGACGGCCCTCGGGTTGTAAACTGCTGTCACGCTATAGGAACTCCCTACTGTTAATAGCTTTAGGGCTGACCAAAGCGAAAGGAAGCACCGGCTAACTCCGTGCCAGCAGCCGCGGTAAGACGGAGGGTGCAAACGTTGTTCGGAATCACTGGGCATAAAGAGCACGTAGGCGGCCAACTAAGTCGGATGTGAAAGCCCTCGGCTCAACCGAGGAACTGCACCCGATACTGATTGGCTTGAGGACGGCAGGGGTGAGTGGAACTCCAGGTGGAGCGGTGAAATGCGTAGATATCTGGAGGAACACCGGTGGCGAAAGCGGCTCACTGGGCCGTCTCTGACGCTGA…
cc9387937343d5731d409e45d8efdd9a	D_0__Bacteria;D_1__Actinobacteria;D_2__Thermoleophilia;D_3__Gaiellales;D_4__uncultured	TGGGGAATCTTGCGCAATGGGCGAAAGCCTGACGCAGCAACGCCGCGTGAGCGAAGAAGGCCTTCGGGTTGTAAAGCTCTGTCAGGAGGGACGAAGCCACTCAGGTTAATAGCCGAGAGGGTGACGGTACCTCCAGAGGAAGCCCCGGCTAACTACGTGCCAGCAGCCGCGGTAATACGTAGGGGGCAAGCGTTGTCCGGAATCATTGGGCGTAAAGCGCGTGTAGGCGGCCATCCAAGTCCGATGTGAAAGCTCGGGGCTCAACCCCGAGTCTGCATTGGAAACTGGTTGGCTTGAGTCCGGAAGAGGAGACTGGAATTCCTGGTGTAGCGGTGAAATGCGCAGATATCAGGAAGAACACCGGTGGCGAAGGCGGGTCTCTGGGATGGTACTGACGCT…
9a9c0098155b2b3eda4d620af1d519f5	D_0__Bacteria;D_1__Acidobacteria;D_2__Blastocatellia (Subgroup 4);D_3__Blastocatellales;D_4__Blastocatellaceae;D_5__Blastocatella;D_6__uncultured marine bacterium	GACAGCCTACGGGAGGCAGCAGTCGGGAATTTTGGGCAATGGGCGAAAGCCTGACCCAGCAACGCCGCGTGAAGGATGAAGTCTTTCGGGATGTAAACTTCGAAATTATAGGAAGAATCAATGACGGTACTATAAGTAAGCTCCGGCTAACTACGTGCCAGCAGCCGCGGTAATACGTAGGGGGCAAGCGTTGTTCGGATTTACTGGGCGTAAAGGGTGCGTAGGCGGCGCGACAAGTTACTTGTGAAATCTCCGGGCTTAACTCGGAACTGCCAAGTAAAACTGTTGTGCTAGAGTGCAGGAAGGGCAACTGGAATTCTTGGTGTAGCGGTGAAATGCGTAGATATCAAGAGGAACACCTGAGGCGAAGGCGAGTTGCTAGACTGACACTGACGCTGA…
35d0b6b39557b574a2ad9faa4e9022d9	D_0__Bacteria;D_1__Proteobacteria;D_2__Deltaproteobacteria;D_3__Myxococcales;D_4__Nannocystaceae	TGGGGAATATTGCGCAATGGGCGAAAGCCTGACGCAGCCACGCCGCGTGAGCGATGAAGGTCTTCGGATCGTAAAGCTCTGTGGAGGGAGAAGAACAAAGCCGGCGAAGAACCGGCCTTGACGGTATCCCTTTAGCAAGCACCGGCTAACTCCGTGCCAGCAGCCGCGGTAATACGGAGGGTGCGAACGTTGCTCGGAATTACTGGGCGTAAAGCGCACGTAGGCGGCTAAGCAAGTTGGATGTGAAAGCCCAGGGCTCAACCTTGGAAGTGCATCCAAAACTGCTTGGCTTGAATCGCGGAGGGGGCCAGAGAATTCCCGGTGTAGAGGTGAAATTCGTAGATATCGGGAGGAATACCAGTGGCGAAGGCGCTGGCCTGGACGACGATTGACGCTGAG…
61ae18c3b98e52154e03424a5c4b0e01	D_0__Bacteria;D_1__Proteobacteria;D_2__Alphaproteobacteria;D_3__Rhodobacterales;D_4__Rhodobacteraceae;D_5__Sedimentitalea	TGGGGAATCTTGGACAATGGGCGCAAGCCTGATCCAGCCATGCCGCGTGAGTGATGAAGGCCCTAGGGTCGTAAAGCTCTTTCGCCAGAGATGATAATGACAGTATCTGGTAAAGAAGTCCCGGCTAACTCCGTGCCAGCAGCCGCGGTAATACGGAGGGGACTAGCGTTGTTCGGAATTACTGGGCGTAAAGCGTACGTAGGCGGATCAGAAAGTATGGGGTGAAATCCCAGGGCTCAACCCTGGAACTGCCTCATAAACTCCTGGTCTAGAGTTCGAGAGAGGTGAGTGGAATTCCGAGTGTAGAGGTGAAATTCGTAGATATTCGGAGGAACACCAGTGGCGAAGGCGGCTCACTGGCTCGATACTGACGCTGAGGTACGAAAGTGTGGGGAGCAA…
94147435ff0f2ed1eb50895bc538c3e8	D_0__Bacteria;D_1__Proteobacteria;D_2__Deltaproteobacteria;D_3__Myxococcales;D_4__Phaselicystidaceae;D_5__Phaselicystis;D_6__uncultured bacterium	TGGGGAATCTTGCGCAATGGGCGAAAGCCTGACGCAGCGACGCCGCGTGAGCGACGAAGGCCCTCGGGTTGTAAAGCTCTGTGGAGAGGGAAGAATAAGGGCAGGCCAATACCCTGTCTGATGACGGTACCTCTTTAGCAAGCACCGGCTAACTCTGTGCCAGCAGCCGCGGTAAGACAGAGGGTGCAAACGTTGTTCGGAATTACTGGGCGTAAAGCGCGTGTAGGCGGCTATGCAAGTCGGGTGTGAAAGCCCTGGGCTCAACCGAGGAAGTGCACTCGAAACTGCATAGCTAGAGTCCCGGAGAGGATGGTGGAATTCTAGGTGTAGAGGTGAAATTCGTAGATATCTAGAGGAACACCGGTGGCGAAGGCGGCCATCTGGACGGGTACTGACGCT…
1dd746a6414ff4ff2748c5181a188aea	D_0__Bacteria;D_1__Actinobacteria;D_2__Acidimicrobiia;D_3__Microtrichales;D_4__Ilumatobacteraceae;D_5__Ilumatobacter	TAGGGAATCTTGCACAATGGGCGAAAGCCTGATGCAGCAACGCCGCGTGCGGGAAGAAGGCCCTAGGGTTGTAAACCGCTTTCAGCAGGGAAGAAAATGACGGTACCTGCAGAAGAAGGTGCGGCCAACTACGTGCCAGCAGCCGCGGTGACACGTAGGCACCAAGCGTTATCCGGATTTATTGGGCGTAAAGAGCTCGTAGGCGGTTCGGTAAGTCGGGTGTGAAAACTCTAGGCTCAACCTAGAGAGGCCACTCGATACTGCCGTGACTAGAGTACGGTAGGGGAGCGGGGAATTTCTGGTGTAGCGGTGAAATGCGCAGATATCAGAAGGAACACCAGTGGCGAAGGCGCCGCTCTGGGCCGTAACTGACGCTGAGGAGCGAAAGCATGGGTAGCA…
7716af4c94f60fce6dbd41a41095a48c	D_0__Bacteria;D_1__Planctomycetes;D_2__Planctomycetacia;D_3__Pirellulales;D_4__Pirellulaceae;D_5__Pir4 lineage;D_6__uncultured bacterium	TCGAGAATCTTCGGCAATGGACGCAAGTCCGACCGAGCGACGCCGCGTGCGGGATGAAGGCCTTCGGGTTGTAAACCGCTGTCAGAGGGGAGGAAATCTAGGTGGGCTATCCCATCTAGTTGACCTAGCCTCAGAGGAAGTACGGGCTAAGTTCGTGCCAGCAGCCGCGGTAATACGAACCGTACAAACGTTATTCGGAATCATTGGGCTTAAAGGGTGCGTAGGCGGTGCGGTAAGTTGGGTGTGAAATCCCTCGGCTCAACCGAGGAACTGCGCTCAATACTGCCGTACTTGAGGGAGACAGAGGTAAGCGGAACTGATGGTGGAGCGGTGAAATGCGTTGATATCATCAGGAACACCAGTAGCGAAGGCGGCTTACTGGGTCTCTTCTGACGCTGA…
7723ef60f64655112cdd67ebfd7911f8	D_0__Bacteria;D_1__Planctomycetes;D_2__OM190;D_3__hydrothermal vent metagenome;D_4__hydrothermal vent metagenome;D_5__hydrothermal vent metagenome;D_6__hydrothermal vent metagenome	TCGAGAATCTTCCGCAATGGGCGAAAGCCTGACGGAGCGACACCGCGTGCAGGATGAAGGCCTTAGGGTTGTAAACTGCTGTCACGCCATAGGAATGGCGCGTTATTAATAGTTGCGCGTTTGACCAAAGCGAAAGGAAGCACCGGCTAACTCCGTGCCAGCAGCCGCGGTAAGACGGAGGGTGCAAACGTTGTTCGGAATCACTGGGCATAAAGCGCACGCAGGCCGCCATTTAAGTCAGATGTGAAAGCCCACGGCTCAACCGTGGAACTGCATTTGATACTGGATGGCTAGAGTACGGTTGGGGTGAGTGGAACTCCTGGTGGAGCGGTGAAATGCGTAGATATCAGGAGGAACACCAGTGGCGAAAGCGGCTCACTGGACCGTAACTGACGCTCA…
a099083b47401478660c1126d58346e5	D_0__Bacteria;D_1__Chloroflexi;D_2__Anaerolineae;D_3__Anaerolineales;D_4__Anaerolineaceae;D_5__Pelolinea;D_6__uncultured bacterium	TAGGGAATATTGGACAATGGGCGAAAGCCTGATCCAGCAACGCCGCGTGCACGATGACGGCCTTCGGGTTGTAAAGTGCTTTTAGAGGAGATGAGAAAGGACAGTATCCTCTGAATAAGCCTCGGCGAACTACGTGCCAGCAGCCGCGGTAAAACGTAGGAGGCAAGCGTTATCCGGATTTATTGGGCGTAAAGCGCGTGCAGGCGGTTTATCAAGTTGGATGTGAAAGCTCCCGGCTTAACTGGGAGAGGTCGTTCAATACTGATAGACTAGAGAATGGGAGAGGGAGGTGGAATTCCGGGTGTAGTGGTGAAATGCGTAGATATCCGGAGGAACACCAGTGGCGAAAGCGGCCTCCTAGACCATTTCTGACGCTAAGACGCGAAAGCTAGGGTAGCA…
26e3e79d8c079475623b4afd63c774e9	D_0__Bacteria;D_1__Proteobacteria;D_2__Deltaproteobacteria;D_3__SAR324 clade(Marine group B);D_4__uncultured bacterium;D_5__uncultured bacterium;D_6__uncultured bacterium	TGGGGAATTTTGCGCAATGGGGGAAACCCTGACGCAGCAATACCGCGTGGGTGAAGAAGGATTTTGGTTCGTAAAGCCCTTTTCTAAAGGAAGATGATGACGGTACTTTAGGAATAAGCACCGGCTAACTCCGTGCCAGCAGCCGCGGTAATACGGAGGGTGCGAGCGTTGTTCGGATTTACTGGGCGTAAAGGGCGCGTAGGCGGTCTGGTCAGCTAAGGGTGAAATCCCGGGGCTCAACCCCGGAATAGCTCTTGGAACTACTAGACTAGAGATGGTTAGAGGCAAGTGGAATTCCTGGTGTAGAGGTGAAATTCGTAGATATCAGGAGGAACACCGGCGGCGAAGGCGGCTTGCTGGAGCTTATCTGACGCTGAAGCGCGAAAGCGTGGGGAGCAA…
4d660ff5673b3bd01c8138a04d031e78	D_0__Bacteria;D_1__Cyanobacteria;D_2__Oxyphotobacteria;D_3__Chloroplast;D_4__Planoglabratella opercularis;D_5__Planoglabratella opercularis;D_6__Planoglabratella opercularis	TGGGGAATTTTCCGCAATGGGCGAAAGCCTGACGGAGCAATACCGCGTGAGGGATGACGGCCTATGGGTTGTAAACCTCTTTTTTCAGGGAGGAATCAATGACGTTACCTGAAGAATAAGCATCGGCTAACTCCGTGCCAGCAGCCGCGGTAAGACGGAGGATGCAAGTGTTATCCGGAATCACTGGGCGTAAAGCGTCTGTAGGTGGTTTAATAAGTCAACTGTTAAATCTTGAGGCTCAACCTCGAAATCGCAGTCGAAACTATTAGACTAGAGTATAGTAGGGGTAAAGGGAATTTCCAGTGGAGCGGTGAAATGCGTAGATATTGGAAGGAACACCGATGGCGAAGGCACTTTACTGGGCTATTACTAACACTCAGAGACGAAAGCTAGGGTAGC…
5ccfae97d37a60ab6c513e1116ae03fa	D_0__Bacteria;D_1__Bacteroidetes;D_2__Bacteroidia;D_3__Cytophagales;D_4__Cyclobacteriaceae;D_5__uncultured;D_6__uncultured bacterium	TGAGGAATATTGGACAATGGACGCAAGTCTGATCCAGCCATGCCGCGTGCAGGAAGAAGGCCTTCTGGGTTGTAAACTGCTTTTATACAAGAAGAAAAAGTCCCTGCGGGGAAAACTGACGGTACTATATGAATAAGCACCGGCTAACTCCGTGCCAGCAGCCGCGGTAATACGGAGGGTGCAAGCGTTGTCCGGATTCACTGGGTTTAAAGGGTGCGTAGGCGGATTAATAAGTCAGTGGTGAAATCCTACAGCTTAACTGTAGAACTGCCATTGATACTGTTAATCTTGAGTCCAGTCGAGGTGGATGGAGTTTATGATGTAGCGGTGAAATGCATAGATATCATAAAGAACACCAATTGCGAAGGCAGTTCACTAGACTGGTACTGACGCTCAGGC…
15a2c8dfb85a611828a00d67a2c85ac9	D_0__Bacteria;D_1__Patescibacteria;D_2__Gracilibacteria;D_3__Candidatus Peregrinibacteria;D_4__uncultured bacterium;D_5__uncultured bacterium;D_6__uncultured bacterium	TAAAGAATCTTTCGCAATGGGGGAAACCCTGACGAAGCGACACCGCGTGGTTGACGAAGCCCTTTGGGGTGTAAAGCCCTTTTTTGAGGGAATAATTATGAAGGTACCTTAAGAATAAGCACCGGCTAACTCCGTGCCAGCAGCCGCGGTAATACGGAGGGTGCAAACGTTATCCGGAATCATTGGGCGTAAAGCGTTCGTAGGCGGTTTAATTAGTCAAATGTTAAATTTCACAGCTCAACTGTGAACTCGTATTTGAAACTGTTAAACTAGAGAATTACAGAGGCAAGTGGAATTCTATGTGTAGGGGTAAAATCCGTAGATACATAGAGGAACACCAAAAGCGAAGGCAGCTTGCTGGGTAATTTCTGACGCTCAGGGACGAAAGCGTGGGGAGCG…
e49c75f4818b4f45a4f131f08307fcde	D_0__Bacteria;D_1__Chloroflexi;D_2__Anaerolineae;D_3__Anaerolineales;D_4__Anaerolineaceae;D_5__uncultured;D_6__uncultured Anaerolineaceae bacterium	TAGGGAATATTGCACAATGGGCGAAAGCCTGATGCAGCAACGCCGCGTGCACGATGAAGGCTCTAGGGTTGTAAAGTGCTTTTCTGGAGGAAGAGAATGGACGGTACTCCAGGAATAAGGATCGGCTAACTACGTGCCAGCAGCCGCGGTAACACGTAGGATTCAAGCGTTATCCGAATTTACTGGGCGTAAAGCGCGTGTAGGCGGTTCGGTAAGTTGGACGTGAAAGCTCCTGGCTCAACTGGGAGAGGTCGTTCAAAACTTCCGGACTAGAGGACGGTAGAGGATGGCGGAATTCCCGGTGTAGCGGTGAAATGCGTAGATATCGGGAGGAACATCAGTGGCGAAGGCGGCCATCTGGATCAAGACTGACGCTGAGGTGCGAAAGCGTGGGGAGCA…
bb47d44fa73334a8ede6b9a318ac5d2c	D_0__Bacteria;D_1__Lentisphaerae;D_2__Oligosphaeria;D_3__SS1-B-02-17;D_4__uncultured bacterium;D_5__uncultured bacterium;D_6__uncultured bacterium	TCGAGAATCTTCCGCAATGCGCGAAAGCGTGACGGAGCAATGCCGCGTGAAGGACGAAGGCCTTCGGGTCGTAAACTTCTGTCACCCGGGATGAATATGTGACAGTACCGGGAGAGGAAGCCACGGCTAACTACGTGCCAGCAGCCGCGGTAATACGTAGGTGGCGAGCGTTATTCGGATTTATTGGGCGTAAAGGGTTCGTAGGGGGTTTGGTCAGTCTGGTGTGAAATGCCGCGGCTCAACTGCGGAACTGCACTGGATACTGCCAGACTTGAGGACGTGAGAGGAGAGCGGAATTCCTGGTGTAGCGGTGGAATGCGTAGATATCAGGAGGAACATCGACGGCGAAGGCAGCTCTCTGGACCGTACCTGACCCTGAGGAACGAAAGCTGGGGTAGC…
0d850d303e55130c8e5595130bd3ff78	D_0__Bacteria;D_1__Planctomycetes;D_2__Planctomycetacia;D_3__Pirellulales;D_4__Pirellulaceae;D_5__Pir4 lineage	TCGAGAATCTTCGGCAATGGGCGCAAGCCTGACCGAGCGACGCCGCGTGCGGGATGAAGGCCTTCGGGTTGTAAACCGCTGTCAGTGGGGAGGAAATGCATGAGGGTACTCTCTCATGTTTGACCTATCCGCAGAGGAAGTCCGGGCTAAGTTCGTGCCAGCAGCCGCGGTAAGACGAACCGGACAAACGTTATTCGGAATTATTGGGCTTAAAGGGTGCGTAGGCGGTGCGGTAAGTCAGGTGTGAAAGCCCTCGGCTCAACCGAGGAATTGCGCCTGATACTGCCGTGCTTGAGGGAGACAGAGGTGAGCGGAACTGATGGTGGAGCGGTGGAATGCGTTGATATCATCAGGAACACCAGTGGCGAAGGCGGCTCACTGGGTCTCTTCTGACGCTGA…
96242cb9532a2b89a6e4200216c77b8d	D_0__Bacteria;D_1__Proteobacteria;D_2__Gammaproteobacteria;D_3__Thiohalorhabdales;D_4__Thiohalorhabdaceae;D_5__uncultured;D_6__uncultured marine bacterium	TGGGGAATATTGCACAATGGGCGCAAGCCTGATGCAGCGACGCCGCGTGAGGGATGACGGCCTTCGGGTTGTAAACCTCTTTCAGTAGGGAAGAAGCGAAAGTGACGGTACCTACAGAAGAAGCACCGGCTAACTCCGTGCCAGCAGCCGCGGTTATACGGAGGGTGCAAGCGTTAATCGGAATTACTGGGCGTAAAGCGCGCGTAGGCGGCTTTGTAAGTCGGATGTGAAAGCCCTGGGCTCAACCCAGGAATTGCATTCGATACTGCAGAACTAGAGTATGGTAGAGGGAAGTGGAATTTCCGGTGTAGCGGTGAAATGCGTAGATATCGGAAGGAACACCAGTGGCGAAGGCGACTTCCTGGGCCAATACTGACGCTGAGGTGCGAAAGCGTGGGG…
8df217e980892b5425c9de7e3cbec855	D_0__Bacteria;D_1__Fibrobacteres;D_2__Chitinivibrionia;D_3__Chitinivibrionales;D_4__Chitinivibrionaceae;D_5__possible genus 03;D_6__uncultured bacterium	TAGGGAATCTTGCGCAATGGACGAAAGTCTGACGCAGCAACTCCGCGTGAGGGAAGACGGGCTTCGGTTTGTAAACCTCTTTTATTTGGGAAGAAAAACTCTATGGCGACATAGAACTTGACGGTACCATTTGAATAAGCGACGGCTAAATACGTGCCAGCAGCCGCGGTAATACGTATGTCGCGAGCGTTATTCGGAATCACTGGGCGTAAAGAGTTCGTAGGCGGACTTTCAAGTCAGAGGTGAAATTTTGGGGCTTAACCCCGAAACTGCCTTTGAAACTGTTAGTCTTGAGTATGTGAGGGGATGATGGAATTCCAGGTGTAGCGGTGGAATGCGTAGATATCTGGAAGAACACCGGTGGCGAAGGCGGTCATCTGGCACAATACTGACGCTGAG…
ad9582d2374a42a4e5b870d8492f82f1	D_0__Bacteria;D_1__Proteobacteria;D_2__Deltaproteobacteria;D_3__Myxococcales;D_4__UASB-TL25;D_5__uncultured bacterium;D_6__uncultured bacterium	TGGGGAATATTGGACAATGGGCGCAAGCCTGATCCAGCCACGCCGCGTGTGTGATGAAGGCTTTCGGGTCGTAAAGCACTGTGGAGGGGGAAGAACAAGTGCAGGCCAATACCCTGCACCCTGACGGTACCCCTTTAGCAAGCACCGGCTAACTCCGTGCCAGCAGCCGCGGTAATACGGAGGGTGCAAACGTTGCTCGGAATTATTGGGCGTAAAGCGCGTGTAGGCGGCTTGTTAAGTCGGATGTGAAAGCCCCGGGCTCAACCCGGGAAGTGCGTTCGATACTGGCAAGCTTGAGTACAGGAGAGGGTGGCGGAATTCCCGGTGTAGAGGTGAAATTCGTAGATATCGGGAGGAACACCAGTGGCGAAGGCGGCCACCTGGACTGATACTGACGCT…
230a6ece886690d51609d93bafd42b93	D_0__Bacteria;D_1__Cyanobacteria;D_2__Oxyphotobacteria;D_3__Chloroplast	TGGGGAATTTTCCGCAATGGGCAAAAGCCTGACGGAGCAATACCGCGTGAGGGATGACGGCCTATGGGTTGTAAACCTCTTTTTTCAGGGAGGAATAAAATGACGTGTACCTGAAGAATAAGCATCGGCTAACTCCGTGCCAGCAGCCGCGGTAAGACGGAGGATGCAAGTGTTATCCGGAATCACTGGGCGTAAAGCGTCTGTAGGTGGTTAAATAAGTCAACTGTTAAATCTTGAGGCTCAACTTCAAAATCGCAGTCGAAACTATTAGACTAGAGTATAGTAGGGGTAAAGGGAATTTCCAGTGGAGCGGTGAAATGCGTAGAGATTGGAAAGAACACCGATGGCGAAGGCACTTTACTGGGCTATTACTAACACTGAGAGACGAAAGCTAGGGTA…
3576194c7d30b20bb2c440eab49d62bf	D_0__Bacteria;D_1__Actinobacteria;D_2__Acidimicrobiia;D_3__Microtrichales;D_4__Microtrichaceae;D_5__Sva0996 marine group	TAGGGAATCTTGCGCAATGGGCGAAAGCCTGACGCAGCAACGCCGCGTGGGGGATGAAGGCTCTAGGGTTGTAAACCCCTTTCAGCAGGGACGAAAATGACGGTACCTGCAGAAGAAGCCCCGGCCAACTACGTGCCAGCAGCCGCGGTAACACGTAGGGGGCAAGCGTTGTCCGGAATTATTGGGCGTAAAGAGCTCGTAGGCGGTTTGGTAAGTCAGATGTGAAAACTCAGGGCTCAACCCGGAGAGGCCATCTGATACTGCCATGACTAGAGTCCGGTAGAGGAGTGTGGAATTCCTGGTGTAGCGGTGAAATGCGCAGATATCAGGAGGAACACCAACGGCGAAGGCAGCACTCTGGGCCGGTACTGACGCTGAGGAGCGAAAGCGTGGGGAGCA…
e267aabbb01c6a63666b0625ca995c60	D_0__Bacteria;D_1__Spirochaetes;D_2__Leptospirae;D_3__Leptospirales;D_4__Leptospiraceae;D_5__RBG-16-49-21;D_6__uncultured bacterium	TTAAGAATCTTGCGCAATGGGGGAAACCCTGACGCAGCGACGCCGCGTGGACGATGAAGGCCTTCGGGTTGTAAAGTCCAATAAGTAGGGAAGAATAAGCAGCAGGTAATATTTGCTGTGATGACGGTACCTACCTAAAGCCCCGGCTAACTACGTGCCAGCAGCCGCGGTAATACGTATGGGGCAAGCGTTGTTCGGAATTATTGGGCGTAAAGGGCGTCTAGGCGGGGAATTAAGTTATGTGTGAAATCCAAGGGCTCAACCCTTGAACTGCACCTAAAACTGATTCTCTTGAGTTCGGGAGAGGAGTGCGGAATTCCCAGTGTAGCGGTGAAATGCGTAGATATTGGGAAGAACACCAGTGGCGAAGGCGGCACTCTGGCCTAGAACTGACGCTGA…
cdf3d9a3db7b365117dc8fea7778111e	D_0__Bacteria;D_1__Proteobacteria;D_2__Gammaproteobacteria;D_3__Cellvibrionales;D_4__Halieaceae	TGGGGAATCTTGGACAATGGGCGAAAGCCTGATCCAGCGACGCCGCGTGAGTGATGAAGGCCCTCGGGTTGTAAAGCTCTGTCAGGGGGAACGAATAAGGGTGATTTAATAGATCATCTGATGACGGTACCTCCAAAGGAAGCACCGGCTAACTCTGTGCCAGCAGCCGCGGTAATACGGAGGGTGCAAGCGTTAATCGGAATTACTGGGCGTAAAGCGCGCGTAGGCGGTTTGTTAAGTCGGATGTGAAAGCCCTGGGCTCAACCTGGGAACTGCATTCGATACTGATCGACTAGAGTACGAGAGAGGGAGGTAGAATTCCACGTGTAGCGGTGAAATGCGTAGATATGTGGAGGAATACCGGTGGCGAAGGCGGCCTCCTGGCTCGATACTGACGCT…
f84ed9a63b5039801856299b99f8ade3	D_0__Bacteria;D_1__Planctomycetes;D_2__Planctomycetacia;D_3__Pirellulales;D_4__Pirellulaceae;D_5__Blastopirellula	TCGAGAATCTTCCGCAATGGACGAAAGTCTGACGGAGCGACGCCGCGTGCTGGATGAAGGCCCTCGGGTTGTAAACAGCTGTCGTAGGGGAGGAAATTTTGACCGATCCTAGGAGGAAGCACAGGCTAAGTTCGTGCCAGCAGCCGCGGTAATACGAACTGTGCAAACGTTATTCGGAATCACTGGGCTTAAAGGGTGCGTAGGCGGACTTGTAGGTCAGGTGTGAAATCCCACGGCTCAACCGTGGAATTGCGCTTGAAACCACTCGTCTTGAGGGGATCAGAGGAGAGCGGAACTGATGGTGGAGCGGTGAAATGCGTTGATATTATCAGGAACACCGGTGGCGAAAGCGGCTCTCTGGGATCCTTCTGACGCTGAGGCACGAAAGCTAGGGGAGCG…
c3d0f1b9c2c4ba532f931d0ddfdfc21e	D_0__Bacteria;D_1__Planctomycetes;D_2__Planctomycetacia;D_3__Pirellulales;D_4__Pirellulaceae	TCGAGAATCTTCCGCAATGGGCGAAAGCCTGACGGAGCGACGCCGCGTGCGGGATGAAGGCCTTCGGGTTGTAAACCGCTGTCAGTTGGGAGGAAATGCATAAGGGTTCTCTCTTATGTTTGACCGATCTTCAGAGGAAGGACGGGCTAAGTTCGTGCCAGCAGCCGCGGTAACACGAACCGTCCAAACGTTATTCGGAATAACTGGGCTTAAAGGGTTCGTAGGCGGCTATGAAGGTGGGGTGTGAAATCCCTCGGCTCAACCGAGGAACTGCGCTCCAAACCACGTAGCTTGAGGGAGACAGAGGTAAGCGGAACTGATGGTGGAGCGGTGAAATGCGTTGATATCATCAGGAACACCAGTGGCGAAGGCGGCTTACTGGGTCTCTTCTGACGCTGA…
a125fbc19171087fc36458cb2948aef7	D_0__Bacteria;D_1__Bacteroidetes;D_2__Bacteroidia;D_3__Bacteroidetes VC2.1 Bac22;D_4__uncultured Bacteroidetes bacterium;D_5__uncultured Bacteroidetes bacterium;D_6__uncultured Bacteroidetes bacterium	TAAGGAATATTGGTCAATGGACGCAAGTCTGAACCAGCCATGCCGCGTGCAGGAAGACGGCCTTATGGGTTGTAAACTGCTTTTATAAAGGAATAATACCCTGTACGTGTACAGGGTTGAAGGTACTTTAGGAATAAGCACCGGCTAACTCCGTGCCAGCAGCCGCGGTAATACGGAGGGTGCAAGCGTTATCCGGATTTATTGGGTTTAAAGGGTGCGCAGGCGGACCTATTAGTCAGTGGTGAAATCCCGGGGCTCAACTCCGGAACTGCCATTGATACTGTAGGTCTTGAATTCGGTTGAAGTAGGCGGAATGTAGCATGTAGCGGTGAAATGCATAGATATGCTACAGAACACCGATCGCGAAGGCAGCTTACTAAGCCGATATTGACGCTCAGG…
9a467aa94e65df815ff15c97fcb0e70c	D_0__Bacteria;D_1__Chloroflexi;D_2__Dehalococcoidia	CAAGGAATATTGGGCAATGGGCGAAAGCCTGACCCAGCGACGCCGCGTGAGGGATGAAGGCCTTCGGGTCGTAAACCTCTTTTCTCAGGGAAGAATAATGACGGTACCTGAGGAATAAGTCTCGGCTAACTACGTGCCAGCAGCCGCGGTAATACGTAGGAGGCAAGCGTTATCCGGAATTATTGGGCGTAAAGCGGGTGCAGACGGCCTTTTAAGTCAGATGTAAAATCTCCCGGCTCAACTGGGAGGGACCATTCGATACTGATGGGCTAGAGGGCAGCAGAGGGAGGTGGAATTCCCGGTGTAGTGGTGATATGCGTAGATATCGGGAGGAACACCAGTGGCGAAGGCAGCCTCCTGGGCTGTTTCTGACGTTGAGACCCGTAAGCGTGGGGAGCA…
674e7bca06d04f845eefadf696046f64	D_0__Bacteria;D_1__Bacteroidetes;D_2__Ignavibacteria;D_3__OPB56	TGAGGAATTTTGGTCAATGGGGGAAACCCTGAACCAGCGACGCCGCGTGCGGGATGAAGGGGTTTTGCCCTGTAAACCGCTGTCGGAAGGGAAGAAAAGCCCCCTCAGGGGGCCGGGACAGTACCTTCAAAGGAAGGACCGGCTAACTACGTGCCAGCAGCCGCGGTAATACGTAGGGTCCGAGCGTTGTCCGGATTTACTGGGTGTAAAGGGTGCGCAGGCGGGCTTGTGCGTCAAGGGTTAAATCCATCGGCTTAACCGGTGAGCTGCCCTTGATACGGCAAGTCTTGAATACGAGAGAGGATAGTAGAATTCCTGGTGTAGCGGTGAAATGCGTAGATATCAGGAGGAATACCAGTGGCGAAGGCGGCTATCTGGCTCGTTATTGACGCTCAGGCA…
74b390a8c7169846626f932d54838c28	D_0__Bacteria;D_1__Proteobacteria;D_2__Gammaproteobacteria;D_3__Cellvibrionales;D_4__Halieaceae;D_5__OM60(NOR5) clade	TGAGGAATATTGGGCAATGGAGGCAACTCTGACCCAGCCATGCCGCGTGCAAGAAGACTGCCCTATGGGTTGTAAACTGCTTTTATACAGGAAGAAACACTAGTACGTGTACTAGCTTGACGGTACTGTAAGAAGAAGCACCGGCTAACTCCGTGCCAGCAGCCGCGGTAATACGGAGGGTGCGAGCGTTAATCGGAATTACTGGGCGTAAAGCGCGCGTAGGTGGTTTGTTAAGTCAGCTGTGAAAGCCCTGGGCTCAACCTGGGAATTGCAGTTGATACTGGCCGACTAGAGTACGAGAGAGGGAGGTAGAATTCCATGTGTAGCGGTGAAATGCGTAGATATATGGAGGAATACCAGTGGCGAAGGCGGCCTCCTGGCTCGATACTGACACTGAGG…
48d945fb15760c01b0250720c4d0d362	D_0__Bacteria;D_1__Bacteroidetes;D_2__Bacteroidia;D_3__Chitinophagales;D_4__Saprospiraceae;D_5__uncultured;D_6__uncultured bacterium	TAAGGAATATTGGACAATGCCCGAAAGGGTGATCCAGCCATTCCGCGTGAAGGATGAAGGCCCTATGGGTTGTAAACTTCTTTTAGATGGGAAGAAAGTGTGATATTTATATCATTTTGACGGTACCATCAGAATAAGCACCGGCTAACTCCGTGCCAGCAGCCGCGGTAATACGGAGGGTGCAAGCGTTATCCGGAATCACTGGGTTTAAAGGGTGCGTAGGCGGATATCTAAGTCTGAGGTGAAAGTCTGTAGCTTAACTATAGAATTGCCTTGGATACTGGTTATCTTGAATTGGGTTGAGGATGGCGGAATGTGACATGTAGCGGTGAAATGCATAGATATGTCATAGAACACCAATTGCGAAGGCAGCCATCTGGGCCTTGATTGACGCTGAGG…
6563b14a506bc947fa4d19fee5575a20	D_0__Bacteria;D_1__Proteobacteria;D_2__Alphaproteobacteria;D_3__Rhizobiales;D_4__Methyloligellaceae;D_5__uncultured	TGAGGAATATTGGACAATGGGCGCAAGCCTGATCCAGCCATGCCGCGTGAGTGATGAAGGCCTTAGGGTTGTAAAACTCTTTCACCGGTGAAGATAATGACGGTAGCCGGAGAAGAAGCCCCGGCTAACTCCGTGCCAGCAGCCGCGGTAATACGGAGGGGGCTAGCGTTGTTCGGAATTACTGGGCGTAAAGCGCGCGTAGGCGGACTGGTCAGTTGGGGGTGAAATCCCAAGGCTCAACCTTGGAACTGCCTTCAAAACTGCCAGTCTTGAGTCCGGGAGAGGTGAGTGGAATTCCCAGTGTAGAGGTGAAATTCGTAGATATTAGGAAGAACACCAGTGGCGAAGGCGGCTCACTGGCCCGGTACTGACGCTGAGGTGCGAAAGCGTGGGGAGCAA…
7b33a75d6f400a7b0bed5d41c38991ab	D_0__Bacteria;D_1__Proteobacteria;D_2__Deltaproteobacteria;D_3__PB19;D_4__uncultured deep-sea bacterium;D_5__uncultured deep-sea bacterium;D_6__uncultured deep-sea bacterium	TGGGGAATTTTGCGCAATGGGCGGAAGCCTGACGCAGCAACGCCGCGTGTGTGATGAAGGCCTTCGGGTTGTAAAGCACTGTCTAGAAGGAAGAACAACCGGGGTTTATCCCTCGGCCTGACGGTACTTCTAAAGAAAGCACTGGCTAACTCCGTGCCAGCAGCCGCGGTAATACGGAGAGTGCAAGCGTTGTTCGGAATCATTGGGCGTAAAGGGCGTCTAGGTGGCCCGCCAAGTCAGATGTGAAATCCCTCGGCTCAACCGAGGAACTGCATTTGAAACTGGCGAGCTTGAGTACTGTAGAGGGTAGCGGAATTCCTGGTGTAGAGGTGAAATTCGTAGATATCAGGAGGAACACCAGTGGCGAAGGCGGCTACCTGGCCAGATACTGACACTAAA…
222f5285dbb3fc5253d7e1f986bcb2d9	D_0__Bacteria;D_1__Proteobacteria;D_2__Deltaproteobacteria;D_3__Desulfobacterales;D_4__Desulfobacteraceae	TCTAGAGGCATCCACAATGGACGAAAGTCAGATGGTGCGACGCCGCGTGTGGGATGACGGTCTTCGGATTGTAAACCACTGTCGCGAGGGAATAAGACCGGGTTGGAGCCCCTTCCCGGATTGAAGGTACCTCGCAAGAAAGCACCGGCTAACTCCGTGCTAGCAGCCGCGGTAACACGGAGGGTGCGAGCGTTGTTCGGAATTATTGGGCGTAAAGGGCGCGTAGGCGGCCTGTTGAGTCAGATGTGAAAGCCCGGGGCTCAACCCCGGAAGTGCATTTGATACTGGCAGGCTTGAGTATGGGAGAGGGAAGTGGAATTCCTGGTGTAGAGGTGAAATTCGTAGATATCAGGAGGAACACCGGTGGCGAAGGCGACTTCCTGGACCAATACTGACGCT…
c5c5f6db7253d6d15899d9f5b2a44bd6	D_0__Bacteria;D_1__Actinobacteria;D_2__Acidimicrobiia;D_3__Actinomarinales;D_4__uncultured	CAGGGAATCTTGTCCAATGGGCGAAAGCCTGAGACAGCGACGCCGCGTGAGGGATGAAGGCCTTCGGGTTGTAAACCTCTTTCAGGAGGGACGAAATTGACGGTACCTCCAGAAGAAGCCCCGGCCAACTACGTGCCAGCAGCCGCGGTAATACGTAGGGGGCAAGCGTTGTCCGGATTTATTGGGCGTAAAGGGCTCGTAGGCGGCTCAACAAGTCGGTCGTGAAAACCCAGGGCTCAACCCTGGGACGCCGGTCGATACTGTTGTGGCTTGGGTCCGGTAGAGGAGAATGGAATTCCCGGTGTAGCGGTGAAATGCGCAGATATCGGGAGGAACACCAGTAGCGAAGGCGGTTCTCTGGGCCGGTACCGACGCTGAGGAGCGAAAGCGTGGGGAGCA…
d74ed9fb98d005ad4a3c3c062f1bc114	D_0__Bacteria;D_1__Patescibacteria;D_2__Gracilibacteria;D_3__Candidatus Peregrinibacteria	TAAGGAATCTTCCACAATGGACGAAAGTCTGATGGAGCAACACCGCGTGATCGATGAAGCCTTTTGGGGTGTAAAGATCTTTTCTGAGGGAAGAATTTTGACGGTACCTTAGGAATAAGCACCGGCTAACTCCGTGCCAGCAGCCGCGGTAATACGGAGGGTGCAAGCGTTATCCGGAATCATTGGGCGTAAAGCGTCCGCAGGCGGTTTATTAAGTTAGATGTTAAAGTTCACAGCTCAACTGTGAGTCTATGTCTAAAACTAGTAAACTAGAGTATTGGAGAGGTGTGTAGAATTCTGTGTGTAGGGGTAAAATCCGTAGATACACAGAGGAATACCAAAAGCGAAGGCAGCACACTGGCCAATTACTGACGCTCAGGGACGAAAGCGTGGGTAGCG…
00c81881678c2272b60ed5024245407f	D_0__Bacteria;D_1__Bacteroidetes;D_2__Rhodothermia;D_3__Rhodothermales;D_4__Rhodothermaceae;D_5__uncultured;D_6__uncultured bacterium	TGAGGAATATTGCGCAATGGGCGAAAGCCTGACGCAGCCACGCCGCGTGCAGGATGACACCCCTACGGGGCGTAAACTGCTTTTATGCGAGAAGAATCCCCCGAACGTGTTCGGGACTGACGGTATCGCACGAATAAGGACCGGCTAACTCCGTGCCAGCAGCCGCGGTAATACGGAGGGTCCAAGCGTTGTCCGGATTCATTGGGTGTAAAGGGTGCGCAGGCGGGCTTGTAAGTCAGAGGTGAAATCCCACGGCCTAACCGTGGAACTGCCTTTGATACTGCAAGTCTTGAGTCCTGGAGGGGCTATCGGAATTCGTGGTGTAGCGGTGAAATGCGTAGATATCACGAGGAACACCGGAGGTGTAGACGGATAGCTGGACAGGTACTGACGCTGAGG…
2de23b4b92d15d03d99dc2e30bc9e66f	D_0__Bacteria;D_1__Bacteroidetes;D_2__Bacteroidia;D_3__Bacteroidales;D_4__Bacteroidetes BD2-2	TGAGGAATATTGGTCAATGGGCGAAAGCCTGAACCAGCCAAGCCGCGTGCAGGATGACGGCCCTATGGGTTGTAAACTGCTTTTATACAGGAAGAACCATCTGACGTGTCAGAAACTGACTGTACTGTATGAATAAGCATCGGCTAACTCCGTGCCAGCAGCCGCGGTAATACGGAGGATGCAAGCGTTATCCGGATTTATTAGGTTTAAAGGGTGCGTAGGCGGATTTGTAAGTCAGTGGTGAAATCCTACAGCTTAACTGTAGAACTGCCATTGATACTGTAGATCTTGAGTACAATTGAGGTAGGCGGAATGTGTGGTGTAGCGGTGAAATGCTTAGATATCACACAGAACACCGATTGCGAAGGCAGCTTACTAAACTGTAACTGACGCTGATGC…
0fc9316e3e3dd4cceadb1041b8f37421	D_0__Bacteria;D_1__Bacteroidetes;D_2__Bacteroidia;D_3__Bacteroidetes VC2.1 Bac22;D_4__uncultured Bacteroidetes bacterium;D_5__uncultured Bacteroidetes bacterium;D_6__uncultured Bacteroidetes bacterium	TAAGGAATATTGCGCAATGGACGAAAGTCTGACGCAGCCATGCCGCGTGCAGGAAGACGGCCTTATGGGTTGTAAACTGCTTTTATAAAGGGATAAACTCACTCTCGCGAGGGTGATTGAAGGTACTTTATGAATAAGCACCGGCTAACTCCGTGCCAGCAGCCGCGGTAATACGGAGGGTGCAAGCGTTATCCGGATTTATTGGGTTTAAAGGGTGCGCAGGCGGACCTGCCAGTCAGTGGTGAAATCCCGAGGCTCAACTTCGGAACTGCCATTGATACTACAGGTCTTGAATACGGTTGAGGTAGGCGGAATGTAGCATGTAGCGGTGAAATGCATAGATATGCTACAGAACACCGATCGCGAAGGCAGCTTACCAAACCGATATTGACGCTCAGG…
f432701d12cfe613c374a92962b840ef	D_0__Bacteria;D_1__Chloroflexi;D_2__Anaerolineae	TGAGGAATCTTGCGCAATGGGCGAAAGCCTGACGCAGCAACGCCGCGTGGGTGATGAAGGCCCTTGGGTCGTAAAACCCTTTTCTGGGGGATGAGGAAGGACAGTACCTCTGGAATAAGCCTCGGCTAACTACGTGCCAGCAGCCGCGGTAAAACGTAGGAGGCGAGCGTTATCCGGATTTATTGGGCGTAAAGCGCGTGCAGGCGGTGCCCTAAGTCGGATGTGAAATCTCCCGGCTCAACCGGGAGGGGTCATTCGATACTGGGGCACTTGAGGGCAGGAGAGGGAAGTGGAATTCCCGGTGTAGCGGTGGAATGCGCAGATATCGGGAGGAACACCAGTGGCGAAGGCGGCTTCCTGGCCTGTTTCTGACGCTGAGACGCGAAAGCTAGGGTAGCG…
74894ce286c81014a82d962c625d453f	D_0__Bacteria;D_1__Proteobacteria;D_2__Alphaproteobacteria;D_3__Rickettsiales;D_4__Mitochondria;D_5__Picochlorum sp. SENEW3;D_6__Picochlorum sp. SENEW3	TGGGGAATATTGGACAATGGGCGAAAGCCTGATCCAGTGATATCGCTTTGGGGATGACGGCGACATACGTTGTAAACCCAATGAAGTACGTTTAGATTATGACCGAACGTATTTTAGAAGTCCCGGCTAATCTCGTGCCAGCAGCCGCGGTAATACGAGAGGGGCAAGCGTTATTCAAAATGATTGGGCGTAAAGCGCACGTAGGTGGTGATATGTATCCATAATTATTCAGGCTACAAGTCTTGTCGATATTTATGATGTATATGTATTTCTTGAGGGTGTGAGAGGAGCATGGAATTTCCTAGGAAGCGGTAGAATGTGTTGATCTAGGAAGGAACACCAATAGCGAAAGCAGTGCTCTGGCACATTCCTGACATTGAGGTGCGAAAGCGTGGGGAT…
45217ae3358b478d7f8ba174ff9ee92f	D_0__Bacteria;D_1__Proteobacteria;D_2__Alphaproteobacteria;D_3__Rhodobacterales;D_4__Rhodobacteraceae	TGGGGAATCTTAGACAATGGGCGAAAGCCTGATCTAGCGATGCCGCGTGAGTGACGAAGGCCCTAGGGTCGTAAAGCTCTTTCGCCAGGGATGATAATGACAGTACCTGGTAAAGAAACCCCGGCTAACTCCGTGCCAGCAGCCGCGGTAATACGGAGGGGGTTAGCGTTGTTCGGAATTACTGGGCGTAAAGCGTACGTAGGCGGACTAGTCAGTCAGAGGTGAAATCCCAGGGCTCAACCCTGGAACTGCCTTTGATACTGCTAGTCTTGAGTTCGAGAGAGGTGAGTGGAATTCCGAGTGTAGAGGTGAAATTCGTAGATATTCGGAGGAACACCAGTGGCGAAGGCGGCTCACTGGCTCGATACTGACGCTGAGGTACGAAAGTGTGGGGAGCAA…
e8dec8e4eb8c161011381518311edea3	D_0__Bacteria;D_1__Proteobacteria;D_2__Alphaproteobacteria;D_3__Rickettsiales;D_4__Mitochondria;D_5__uncultured bacterium;D_6__uncultured bacterium	TAGGGAATATTGGACAATGAGGGAAACCTTGATCCAGCAATACTTCATGAAATATGACCACCTAACGGTAGTAAGGTTCTTTCGGCAATGAAAATTATGATTGAAATTGAAGTAAGAAGTCCCGGCAAACTTCGTGCCAGCAGCCGCGGTAATACGAGGGGGACCAGTGTTATTCAGCGTTATTAGGTGTAAAGTGTATGTAGGTTGTTTATTTTAATGTATATTTAAAGGATAAAGTTAAACTTTATTTATATATGTTACAAATAAACTAGAGTAAAGTAGAGGATAGTAGAATTTTCGGTGTAGGGGTGAAATCCATCGATATCGTCAGGAATGCCATCGTGCGAAAGCGGCTATCTGGGCTTTTACTGACATTGAGATACGTAGGTATGGGTATCA…
9693d3567ae4291a53de2905f04ff2f6	D_0__Bacteria;D_1__Planctomycetes;D_2__Planctomycetacia;D_3__Pirellulales;D_4__Pirellulaceae;D_5__Pir4 lineage	CAGGGAATATTGCACAATGGGCGAAAGCCTGATGCAGCGACACCGCGTGCGGGATGAAGGCCTTCGGGTTGTAAACCGCTGTCAGTTGGGAGGAAATCAATAGGGGTTATCCCCTATAGTTGACCTATCTTCAGAGGAAGTCCGGGCTAAGTTCGTGCCAGCAGCCGCGGTAAGACGAACCGGACAAACGTTATTCGGAATCATTGGGCTTAAAGGGTGCGTAGGCGGCGCGGTAAGTGAGGTGTGAAATCCCTCGGCTCAACCGAGGAATTGCGCTTCATACTGCCGTGCTTGAGGGAGACAGGGGTAAGCGGAACTGATGGTGGAGCGGTGAAATGCGTTGATATCATCAGGAACACCAGTGGCGAAGGCGGCTTACTGGGTCTCTTCTGACGCTGA…
1dedbcc72560c5ae54f38d90f02044bb	D_0__Bacteria;D_1__Proteobacteria;D_2__Deltaproteobacteria;D_3__Myxococcales;D_4__bacteriap25	TGAGGAATATTGGACAATGGGCGAAAGCCTGATCCAGCGACGCCGCGTGAGTGATGAAGGCCCTCGGGTCGTAAAGCTCTGTCGGATGGGAAGAAACGGAGTGACCTAATACGTCACTTCTTGACGGTACCATTAAAGGAAGCACCGGCTAACTCTGTGCCAGCAGCCGCGGTAAGACAGAGGGTGCAAGCGTTGTTCGGAATCACTGGGCGTAAAGGGCGTGTAGGCGGTGGCGTATGTCCGATGTGAAAGCCCTCAGCTTAACTGGGGAAGTGCACCGGAAACTACGTTACTTGAGTACGAGAGGGGGTGGCGGAATTCCCGGTGTAGAGGTGAAATTCGTAGATATCGGGAGGAACATCAGTGGCGAAGGCGGCCACCTGGACATTTACTGACGCT…
96d1e023ce0ca490d4b73827584ecc0d	D_0__Bacteria;D_1__Patescibacteria;D_2__ABY1;D_3__Candidatus Magasanikbacteria;D_4__uncultured bacterium;D_5__uncultured bacterium;D_6__uncultured bacterium	TCAAGAATATTCCACAATGGGCGAAAGCCTGATGGAGCGACGCCGCGTGCAGGAAGACGGCCTTCGGGTTGTAAACCGCTTTTCTAAAGGAAGAATTTGTGACGGTACTTTAGGAATAAGAGGTGGCTAACTCTGTGCCAGAAGCCTCGGTAATACAGAGACCTCAAGCGTTATCCGGATTCATTGGGCGTAAAGCGTCCGCAGGTGGTAGTTTAAGTCAATGGTCAAATCTTCGGGCTTAACTCGAAGACTGCCATTGATACTATTCTACTTGAGGCTGGAAGAGGCAAGCGGAACACATGGTGTAGTCGTAATAAGCGCTGATATCATGTGGAACACCAAAGGCGAAGGCAGCTTGCTGGTACATGCCTGACACTAATGGACGAAAGCGTGGGTAGC…
cc47d85629cbec3cbdbe710365f71d77	D_0__Bacteria;D_1__Proteobacteria;D_2__Gammaproteobacteria;D_3__Oceanospirillales;D_4__Gven-F17;D_5__uncultured sediment bacterium;D_6__uncultured sediment bacterium	TGAGGAATATTGGACAATGGGCGAGAGCCTGGTCCAGCCATGCCGCGTGCAGGAAGACTGCCCTATGGGTTGTAAACTGCTTTTATACAGGAAGAAACCTTTTCACGAGTGAAGAGCTGACGGTACTGTAAGAATAAGGATCGGCTAACTCAGTGCCAGCAGCCGCGGTAATACGGAGGGTCCGAGCGTTAATCGGAATTACTGGGCGTAAAGCGCGCGTAGGCGGTTAGATCAGTTGGGTGTGAAAGCCCCGGGCTCAACCTGGGAACTGCATTCAATACTGTCTGACTGGAGTATGGGAGAGGGCAGTGGAATTCCATGTGTAGCGGTGAAATGCGTAGATATGTGGAGGAACACCAGTGGCGAAGGCGACTGCCTGGCCCAATACTGACGCTGAGG…
99b1374fce6b817d1984ccef5c0318d6	D_0__Bacteria;D_1__Chloroflexi;D_2__Anaerolineae;D_3__Anaerolineales;D_4__Anaerolineaceae;D_5__uncultured;D_6__uncultured marine bacterium	TAGGGAATCTTGCACAATCGACGAAAGTCTGATGCAGCAACGCCGCGTGTGCGATGAAGGCCTTCGGGTTGTAAAGCACTTTTCTGAGGGAAGAGAAAGGACGGTACCTCAGGAATAAGTCTCGGCTAACTACGTGCCAGCAGCCGCGGTAATACGTAGGAGGCGAGCGTTATCCGGATTTATTGGGCGTAAAGCGCGTGCAGGTGGTTTGGTAAGTTGGGTATGAAATCTTCTGGCTTAGCTAGGAGAGGTTGCTCAAAACTGCCAGACTAGAGGACGATAGAGGAAGGTGGAATTCCCGGTGTAGTAGTGAAATGCGTAGATACCGGGAGGAACACCAGTGGCGAAGGCGGCCTTCTGGGTCGTTCCTGACACTAAGACGCGAAAGCATGGGTAGCA…
7558a3b5e3695d00d501032e2848a439	D_0__Bacteria;D_1__Proteobacteria;D_2__Gammaproteobacteria	TGAGGAATATTGCACAATGGGCGCAAGCCTGATGCAGCAACGCCGCGTGAGTGAAGAAGGCTCTCTGAGTCGTAAAGCTCTGTAAGTTGGGAGGAACGGTCAGCTATACGCTGATTGGACGGTACCTTCAAAGTAGGCTCCGGCTAACTCCGTGCCAGCAGCCGCGGTAATACGGGGGGAGCAAGCGTTAACCGGAATTACTGGGCGTAAAGCGCGCGTAGGCGGTTTAGTCAGTCAGATGTGAAAGCCCTGGGCTCAACCTGGGAACTGCATTTGATACTGCTGAACTGGAGTATGGTAGAGGGAAGTGGAATTCCGGGTGTAGCGGTGAAATGCGTAGATATCCGGAGGAACACCAGTGGCGAAGGCGACTTCCTGGACCAATACTGACGCTGAGGT…
1d1fdab45d56681cc1727f2e1f413300	D_0__Bacteria;D_1__Bacteroidetes;D_2__Bacteroidia;D_3__Bacteroidales;D_4__Bacteroidetes BD2-2;D_5__uncultured Bacteroidales bacterium;D_6__uncultured Bacteroidales bacterium	TGAGGAATATTGGTCAATGGGCGAAAGCCTGAACCAGCCAATCCGCGTGCAGGATGACGGCCCTACGGGTTGTAAACTGCTTTTGTACGAGAAGGACTACCTGACGTGTCAGGGGCTGACTGTATCGTACGAATAAGCATCGGCTAACTCCGTGCCAGCAGCCGCGGTAATACGGAGGATGCGAGCGTTATCCGGATTTATTAGGTTTAAAGGGTGCGTAGGCTGAATAGTCAGTCAGTGGTGAAATCCTACAGCTTAACTGTAGAACTGCCATTGATACTGCTATTCTTGAGTTCAGTTGAGGTAGGCGGAATGTGTAGTGTAGCGGTGAAATGCTTAGATATTACACAGAACACCGATTGCGAAGGCAGTTTACTAAACTGACACTGACGCTGAGGC…
419f7719e33b190983ccd48d659dcf0d	D_0__Bacteria;D_1__Verrucomicrobia;D_2__Verrucomicrobiae;D_3__Pedosphaerales;D_4__Pedosphaeraceae;D_5__uncultured bacterium;D_6__uncultured bacterium	TCGAGAATCTTTCTCAATGGGCGAAAGCCTGAAGGAGCGACGCCGCGTGGGGGATGAATGGCTTCGGCCCGTAAACCCCTGTCATTCGCAAACAAACCTTGCCGTTTAATAGATGGTAAGCTGAGGGTAGCGAAAGAGGAAGGGACGGCTAACTCTGTGCCAGCAGCCGCGGTAATACAGAGGTCCCAAGCGTTGTTCGGATTCACTGGGCGTAAAGGGTGCGTAGGTGGTACGGTAAGTTTGATGTGAAAGCTCCGAGCTCAACTCGGAAAATGCATTAAATACTATCGAACTAGAGGATTGGAGGGGGGACTGGAATTCTCGGTGTAGCAGTGAAATGCGTAGATATCGAGAGGAACACCAGTGGCGAAGGCGAGTCCCTGGACAACTCCTGACACT…
c2543307c158bcf3b76ff10b55f37800	D_0__Bacteria	TGAGGGATATTGCACAATGGGGGAAACCCTGATGCAGCAACGCCGCGTGGGTGGTGAAGGCCTTCGGGTCGTAAAACCCTTTTCTGGGGGACGAGAAAGGACGGTACCCCAGGAATAAGTCCCGGCTAACTACGTGCCAGCAGCCGCGGTAATACGTAGGGGGCAAGCGTTGTCCGGAATTATTGGGCGTAAAGAGCTCGTAGGCGGCTTGGTAAGTCAACGGTGAAATTTCGAGGCTCAACTTCGAAACTGCCGTCGAAACTGCCATGGCTTGAGGTAGGTAGGGGAGTGTGGAATTCCTGGTGTAGCGGTGAAATGCGCAGATATCAGGAGGAACACCAGTGGCGAAGGCGGCACTCTGGGCCTTACCTGACGCTGAGGAGCGAAAGCTAGGGGAGC…
80fb957d7922ba29cdb1d14ef9764718	D_0__Bacteria;D_1__Fibrobacteres;D_2__Fibrobacteria;D_3__Fibrobacterales;D_4__Fibrobacteraceae;D_5__uncultured;D_6__uncultured bacterium	TAGGGAATTTTGCGCAATGGAGGAAACTCTGACGCAGCAACGCCATGTGTGGGATGAAGCATTTAGGTGTGTAAACCACTGTCGACAGGGACTAATTGCATCGTAAGATGAGTTGAATGTACCTGTAGAGGAAGCCCCGGCTAACTTCGTGCCAGCAGCCGCGGTAATACGAGGGGGGTAAGTGTTGTTCGGAATTACTGGGCGTAAAGGGAGCGTAGGCGGAAGTTTAAGTCGGATGTTTAATCCCGGGGCCCAACCCCGGTCTTGCGTCCGAAACTGGATTTCTTGAATATGACAGAGGTGAATGGAATTCCCGGTGTAGCGGTGGAATGCGTAGATATCGGGAGGAACACCAGTTGCGAAGGCGATTCACTGGGTCAATATTGACGCTGAGGCTCG…
99041ae70cc7be0942fe43a6657f8ce0	D_0__Bacteria;D_1__Bacteroidetes;D_2__Bacteroidia;D_3__Chitinophagales;D_4__Saprospiraceae;D_5__uncultured;D_6__uncultured Sphingobacteriia bacterium	TAAGGAATATTGGACAATGGGCGCAAGCCTGATCCAGCCATCCCGCGTGAAGGATGACGGCCCTATGGGTTGTAAACTTCTTTTATTAGGGAAGAAACCCTTTCATTTATGAGAGGCTGACGGTACCTAAAGAATAAGCACCGGCTAACTCCGTGCCAGCAGCCGCGGTAATACGGAGGGTGCAAGCGTTATCCGGAATCACTGGGTTTAAAGGGTGCGTAGGCGGATAAATAAGTCAGAGGTGAAAGCTTTCAGCTTAACTGGAAAATTGCCTTTGATACTGTTTATCTTGAATGATGTTGAGGTTAGCGGAATGTGACATGTAGCGGTGAAATGCATAGATATGTCATAGAACACCAATTGCGAAGGCAGCTAGCTAGGCATGTATTGACGCTGAGG…
b6f2b931087a91161df64b5628a865a2	D_0__Bacteria;D_1__Planctomycetes;D_2__Planctomycetacia;D_3__Planctomycetales;D_4__Gimesiaceae;D_5__uncultured;D_6__uncultured bacterium	TCGAGAATCTTCGGCAATGGACGCAAGTCTGACCGAGCGACGCCGCGTGCGGGATGAAGGCCCTTGGGTTGTAAACCGCTGTCAGAGGGGATGAAATGCAAGAGGGCTATCCCTCTTGTTTGACAGAGCCTCAGAGGAAGCACGGGCTAAGTACGTGCCAGCAGCCGCGGTAATACGTACTGTGCGAACGTTATTCGGAATCACTGGGCTTAAAGGGTGCGTAGGCGGCCAGGCAAGTAGGATGTGAAATCTCCCGGCTCAACCGGAAAACTGCGTTCTAAACTTCCTGGCTTGAGTGAGATAGGGGTGTGCGGAACTTCCAGTGGAGCGGTGAAATGTGTTGATATTGGAAGGAACGCCGTTAGCGAAAGCGGCACACTGGGTCTCAACTGACGCTGA…
cd39c96a36a9ee71811964a52ec45166	D_0__Bacteria;D_1__Proteobacteria;D_2__Gammaproteobacteria;D_3__Arenicellales;D_4__Arenicellaceae;D_5__Thiolapillus;D_6__uncultured bacterium	TGAGGAATATTGGACAATGGAGGCAACTCTGATCCAGCCATGCCGCGTGAAGGATGACTGCCCTATGGGTTGTAAACTTCTTTTATACAGGAAGAAACACTGGTACGTGTACCAGTTTGACGGTACTGTATGAATAAGCACCGGCTAACTCCGTGCCAGCAGCCGCGGTAATACGGAGGGTGCGAGCGTTAATCGGAATTACTGGGCGTAAAGCGCGCGTAGGCGGTTTAGTCAGTCAGATGTGAAAGCCCTGGGCTCAACCTGGGAACTGCATTTGATACTGCTGAACTGGAGTATGGTAGAGGGAAGTGGAATTCCGGGTGTAGCGGTGAAATGCGTAGATATCCGGAGGAACACCAGTGGCGAAGGCGACTTCCTGGACCAATACTGACGCTGAGG…
8663e1417943ffb8abffccc48ab2359b	D_0__Bacteria;D_1__Proteobacteria;D_2__Alphaproteobacteria;D_3__Rhodospirillales;D_4__uncultured;D_5__uncultured organism;D_6__uncultured organism	TGAGGAATATTGCACAATGGGGGCAACCCTGATGCAGCAACGCCGCGTGAACGATGAAGGCCTTCGGGTTGTAAAGCTCTTTCAATAGTGAAGATGATGACTGTAACTATAGAAGAAGCCCCGGCTAACTTCGTGCCAGCAGCCGCGGTAATACGAAGGGGGCTAGCGTTGTTCGGATTTACTGGGCGTAAAGCGCATGTAGGCTGTTTATTAAGTTAGAGGTGAAATCCCAGGGCTCAACCCTGGAACTGCCTTTGATACTGGTAGACTAGAGTATGATAGAGGATAGTGGAATTCTAAGTGTAGAGGTGGAATTCGTAGATATTTAGAGGAACACCAGTGGCGAAAGCGGCTATCTGGATCATTACTGACGCTGAGATGCGAAAGTGTGGGGAGCAA…
15fee18e8ef64748670d835c135ac3c9	D_0__Bacteria;D_1__Chloroflexi;D_2__Anaerolineae;D_3__Anaerolineales;D_4__Anaerolineaceae;D_5__Pelolinea;D_6__uncultured bacterium	TAGGGAATATTGGACAATGGGCGAAAGCCTGATCCAGCAACACCGCGTGCACGATGACGGCCTTCGGGTTGTAAAGTGCTTTTAGAGGAGATGAGAAAGGACAGTATCCTCTGAATAAGCCTCGGCGAACTACGTGCCAGCAGCCGCGGTAAAACGTAGGAGGCAAGCGTTATCCGGATTTATTGGGCGTAAAGCGCGTGCAGGCGGTCTATCAAGTTGGATGTGAAAGCTCCTGGCTAAACTGGGAGAGGTCGTTCAATACTGTTAGACTAGAGAATAGGAGAGGGAGGTGGAATTCCGGGTGTAGTGGTGAAATGCGTAGATATCCGGAGGAACACCAGTGGCGAAAGCGGCCTCCTAGACTATTTCTGACGCTAAGACGCGAAAGCTAGGGTAGCA…
54e632c09cd5bcda3f12e708f8bb0498	D_0__Bacteria;D_1__Bacteroidetes;D_2__Bacteroidia;D_3__Chitinophagales;D_4__Saprospiraceae;D_5__Lewinella;D_6__Lewinella nigricans	TAAGGAATATTGGACAATGGACGAAAGTCTGATCCAGCCATCCCGCGTGCAGGATGAAGGCGCTACGCGTTGTAAACTGCTTTTGTACAGGAAGAAACTGAGGGATTTATCCCTTTTTGACGGTACTGTAAGAATAAGCACCGGCTAACTCCGTGCCAGCAGCCGCGGTAATACGGAGGGTGCAAGCGTTATCCGGAATTACTGGGTTTAAAGGGTGCGTAGGCGGTTTGATAAGTCAGAAGTGAAAGCCTGCGGCTTAACCGTAGAATTGCTTTTGAAACTGTTGAACTTGAATTAGGTTGAGGTTGGCGGAATGTGACATGTAGCGGTGAAATGCATAGATATGTCATAGAACACCAATTGCGAAGGCAGCTGACTAGACCTTAATTGACGCTGAGG…
8560beaa5f76bf50893f3a09d29ec783	D_0__Bacteria;D_1__Planctomycetes;D_2__Phycisphaerae;D_3__Phycisphaerales;D_4__Phycisphaeraceae;D_5__Urania-1B-19 marine sediment group;D_6__uncultured organism	TAACGAATCTTCCGCAATGCGCGAAAGCGTGACGGAGCAATGCCGCGTGCAGGATGAATCCCTTCGGGGTGTAAACTGCTGTCAGGGTTTAGCAACACAATGAGCAGACCCAAAGGAAGGGCCGGCTAAGTTCGTGCCAGCAGCCGCGGTAATACGAACGGCCCGAGCGTTGCGCGGACTCATTGGGCTTAAAGCGTACGTAGGCGGACGCGCAGGCGTTTTGTGAAAGCCCTCGGCTCAACCGAGGAATTGCTTGGCGAACCGCGTGTCTTGAGGCAAGTAGGGGCTGTCGGAACGATAGGTGGAGTGGTGAAATGCGTTGATATCTATCGGAACGCCGAAGGAGAAATCAGGCAGCTGGGCTTGTCCTGACGCTGAGGTACGAAAGCGTGGGGAGCG…
eaf54e361ad0af7a9813151e08a143b4	D_0__Bacteria;D_1__Bacteroidetes;D_2__Bacteroidia;D_3__Cytophagales;D_4__Cyclobacteriaceae;D_5__uncultured	TGAGGAATATTGGTCAATGGGGGCAACCCTGAACCAGCCATGCCGCGTGCAGGAAGACGGCCTTCTGGGTTGTAAACTGCTTTTATACAGGAGCAAATAGTCCCTGCGGGGAAAGTTGAGAGTATTGTATGAATAAGCACCGGCTAACTCCGTGCCAGCAGCCGCGGTAATACGGAGGGTGCAAGCGTTGTCCGGATTTATTGGGTTTAAAGGGTGCGTAGGCGGTTTATAAAGTCAGTGGTGAAAGTCTTCGGCTCAACCGGAGGATTGCCATTGAAACTTATAAACTTGAGTACAGTAGAGGTAGGCGGAATTTATGATGTAGCGGTGAAATGCATAGATATCATAAAGAACACCGATAGCGAAGGCAGCTTACTATGCTGTTACAGACGCTGAGGC…
dfa58a1153508b23e2bbdb2a174137d4	D_0__Bacteria;D_1__Bacteroidetes;D_2__Bacteroidia;D_3__Chitinophagales;D_4__uncultured;D_5__uncultured Bacteroidetes bacterium;D_6__uncultured Bacteroidetes bacterium	TAGGGAATATTGGTCAATGGGCGAAAGCCTGAACCAGCCATGCCGCGTGGAGGATGACGGCTCTCAGAGTTGTAAACTCCTTTTATATGGGAAGAAACCCCTGGATTCATCCGGGGCTGACGGTACCATACGAATAAGCACCGGCTAACTCCGTGCCAGCAGCCGCGGTAATACGGAGGGTGCAAGCGTTATCCGGATTCACTGGGTTTAAAGGGTGCGCAGGCGGGAAATTAAGTCAGTGGTGAAAGCCCCGAGCTCAACTTGGGAACTGCCATTGATACTGATTTTCTTGAATATAGTTGAGGTAGGCGGAATACAACATGTAGCGGTGAAATGCATAGATATGTTGTAGAACACCAATTGCGAAGGCAGCTTACTAAACTATTATTGACGCTGAGG…
b4ba356e5d9ba7c2e0a7956ad18a123f	D_0__Bacteria;D_1__Chloroflexi;D_2__KD4-96;D_3__uncultured bacterium;D_4__uncultured bacterium;D_5__uncultured bacterium;D_6__uncultured bacterium	TCGGGAATTTTGCTCAATGGGGGAAACCCTGAAGCAGCAACGCCGCGTGAGGGATGAAGGCCTTCGGGTTGTAAACCTCTTTTCTCAGGGACGATAATGACGGTACCTGAGGAATAAGCCACGGCTAACTACGTGCCAGCAGCCGCGGTAATACGTAGGTGGCAAGCGTTGTCCGGATTTACTGGGCGTAAAGAGCGCGCAGGCGGCCAGGTCAGTCGAATGTGAAAGCCCCCGGCTCAACTGGGGAAGGTCATTCGATACTGCTTGGCTTGAAGATGGGAGAGGGAAGCGGAATTTCAGGTGTAGTGGTGAAATGCGTAGATATCTGAAGGAACACCAGTGGCGAAGGCGGCTTTCTGGCCCATTCTTGACGCTGAGGCGCGAAAGCTAGGGGAGCGA…
e5291b6311ba3e9997b834ac9c7bf232	D_0__Bacteria;D_1__Proteobacteria;D_2__Alphaproteobacteria;D_3__Rhodobacterales;D_4__Rhodobacteraceae;D_5__Octadecabacter;D_6__uncultured bacterium	TGGGGAATCTTAGACAATGGGGGAAACCCTGATCTAGCGATGCCGCGTGTGTGACGAAGGCCTTAGGGTCGTAAAGCACTTTCGCCAAGGATGATAATGACAGTACTTGGTAAAGAAACCCCGGCTAACTCCGTGCCAGCAGCCGCGGTAATACGGAGGGGGTTAGCGTTGTTCGGAATTACTGGGCGTAAAGCGCACGTAGGCGGACTTTTAAGTTAGAGGTGAAATCCCAGGGCTCAACCCTGGAACTGCCTTTAATACTGGGAGTCTTGAGTTCGAGAGAGGTGAGTGGAATTCCGAGTGTAGAGGTGAAATTCGTAGATATTCGGAGGAACACCAGTGGCGAAGGCGGCTCACTGGCTCGATACTGACGCTGAGGTGCGAAAGCGTGGGGAGCAA…
c9c47e770e1ddcce8ae6c5868426e44a	D_0__Bacteria;D_1__Bacteroidetes;D_2__Bacteroidia;D_3__Bacteroidales;D_4__Marinilabiliaceae;D_5__uncultured;D_6__uncultured Bacteroidetes bacterium	TGAGGAATATTGGGCAATGGACGGAAGTCTGACCCAGCCATCCCGCGTGCAGGAAGACGGCCCTATGGGTTGTAAACTGCTTTTCTGACGGAAGAATAATCGCTACGTGTAGTGAGACGACGGTACTTCAGGAATAAGCATCGGCTAACTCCGTGCCAGCAGCCGCGGTAATACGGAGGATGCAAGCGTTATCCGGATTCATTGGGTTTAAAGGGTGCGTAGGCGGACTAATAAGTCAGTGGTGAAATCTCTCGGCTCAACCGGGAAACTGCCATTGATACTGTTAGTCTTGAGTTCGGCTGAGGTAGGCGGAATGTGTAATGTAGCGGTGAAATGCTTAGATATTACACAGAACACCAATTGCGTAGGCAGCTTACTAGACCGACACTGACGCTGAGG…
a5ed964dcaac916db5066a1723dece4a	D_0__Bacteria;D_1__Proteobacteria;D_2__Deltaproteobacteria;D_3__Myxococcales;D_4__Eel-36e1D6;D_5__uncultured Polyangiaceae bacterium;D_6__uncultured Polyangiaceae bacterium	TGGGGAATATTGCGCAATGGGCGAAAGCCTGACGCAGCGACGCCGCGTGAGTGATGAAGGCCCTAGGGTTGTAAAGCTCTGTGGAGAGGGACGAATAAGTATGGGCCAATACCCCATGCGATGACGGTACCTTTTTAGCAAGCACCGGATAACTCTGTGCCAGCAGCCGCGGTAAGACAGAGGGTGCGAACGTTGTTCGGAATTACTGGGCGTAAAGCGCGTGTAGGTTGTCGTGCAAGTCGGGTGTGAAAGCCCCGGGCTCAACCTGGGAAGTGCACTCGAAACTGCAAGACTTGAGTATCGGAGAGGGAGGCGGAATTCTGGGTGTAGAGGTGAAATTCGTAGATATCCAGAGGAACACCGGTGGCGAAGGCGGCCTCCTGGACGATTACTGACGCT…
32efe537f45b764c983a1ebf57b366f0	D_0__Bacteria;D_1__Actinobacteria;D_2__Acidimicrobiia;D_3__Actinomarinales;D_4__uncultured;D_5__marine metagenome;D_6__marine metagenome	TGAGGAATATTGGTCAATGGGCGCAAGCCTGAACCAGCCATCCCGCGTGTATGATGACGGCCTTATGGGTTGTAAAGTACTTTTATATACCAAGAAAAGCAGTTACGTGTAATTGTCTGACGGTAGTATATGAATAAGGACCGGCTAACTCCGTGCCAGCAGCCGCGGTAATACGGAGGGTCCAAGCGTTATCCGGATTTATTGGGCGTAAAGGGCTCGTAGGCGGTTCAACAAGTCGGTCGTGAAAGCCCGGGGCTCAACCCCGGGACGCCGGTCGAAACTGTTGTGACTAGGGTCCGGTAGAGGTGAGTGGAATTCTCGGTGTAGCGGTGGAATGCGCAGATATCGAGAGGAACACCAGTAGCGAAGGCGGCTCACTGGGCCGGTACCGACGCTGAG…
9ce53dab049e4192a97b4dc938d20102	D_0__Bacteria;D_1__Patescibacteria;D_2__Saccharimonadia;D_3__Saccharimonadales;D_4__uncultured organism;D_5__uncultured organism;D_6__uncultured organism	TAGGGAATTTTCCACAATGGACGAAAGTCTGATGGAGCAACGCCGCGTGCAGGATGACGGCCTTCGGGTTGTAAACTGCTTTTATGGATGAAGAATATGACAGTAGTCCAAGAATAAGGGACGGCTAACTACGTGCCAGCAGCCGCGGTCATACGTAGGTCCCAAGCGTTATCCGGAATTACTGGGCGTAAAGAGTTGCGTAGGTGGTTTTTTAAGCAGAGTATGAAAGCTCACGGCTCAACCGTGAACCCGTATTCTGAACTGATTAACTAGAGGGCGAGAGAGGTTTCTAGAATTTCTTGTGTAGGAGTGAAATCCGTAGATATAAGAAGGAATACCGATGGCGTAGGCAGGAAACTGGCTCGCACCTGACACTAAGGCACGAAAGCGTGGGTAGCA…
a1a760acb85b35148476b6354ff8d0e5	D_0__Bacteria;D_1__Actinobacteria;D_2__Acidimicrobiia;D_3__Actinomarinales;D_4__uncultured;D_5__marine metagenome;D_6__marine metagenome	CAGGGAATATTGCACAATGGGCGAAAGCCTGATGCAGCGACACCGCGTGCGGGATGAAGGCCTTCGGGTTGTAAACCGCTTTCAGGAGGGACGAAAATGACGGTACCTCCAGAAGAAGGCCCGGCCAACTACGTGCCAGCAGCCGCGGTAATACGTAGGGGCCAAACGTTGTCCGGATTTATTGGGCGTAAAGGGCTCGTAGGCGGTTCAACAAGTCGGTCGTGAAAACCCGGGGCTCAACCCCGGGACGCCGGTCGAAACTGTTGTGACTAGGGTCCGGTAGAGGTGAGTGGAATTCTCGGTGTAGCGGTGGAATGCGCAGATATCGAGAGGAACACCGGTAGCGAAGGCGGCTCACTGGGCCGGTACCGACGCTGAGGAGCGAAAGCATGGGGAGCA…
917a4766f974683c72735f7a81469034	D_0__Bacteria;D_1__Bacteroidetes;D_2__Bacteroidia;D_3__Bacteroidales;D_4__Bacteroidetes BD2-2	TGAGGAATATTGGTCAATGGGCGAAAGCCTGAACCAGCCATGCCGCGTGAAGGATGACAGCGCTATGCGTTGTAAACTTCTTTTGTACGAGAAGAAACGCTCCGACGTGTCGGGGTTTGACGGTACCGTACGAATAAGCATCGGCTAACTCCGTGCCAGCAGCCGCGGTAATACGGAGGATGCAAGCGTTATCCGGATTTATTGGGTTTAAAGGGTACGTAGGCGGAAAATTAAGTCAGTGGTGAAATCCTGCAGCTTAACTGTAGAACTGTCATTGATACTGGTTTTCTTGAATATAGTTGAGGTAGGCGGAATGTGTAATGTAGCGGTGAAATGCTTAGATATTACACAGAACACCGATTGCGAAGGCAGCTTACTAAACTATTATTGACGCTGAGG…
74f59249ad4daaefdefb380c7ab0600c	D_0__Bacteria;D_1__Proteobacteria;D_2__Gammaproteobacteria;D_3__Steroidobacterales;D_4__Woeseiaceae;D_5__Woeseia	TGAGGAATATTGGTCAATGGACGAAAGTCTGAACCAGCCATGCCGCGTGCAGGAAGACGGCCCTACGGGTTGTAAACTGCTTTTATATGGGAAGAAACCCCCTGACGTGTCAGGGGCTGACGGTACCATACGAATAAGCACCGGCTAACTCCGTGCCAGCAGCCGCGGTAATACGGAGGGTGCAAGCGTTAATCGGAATTACTGGGCGTAAAGCGCGCGTAGGCGGCTTTGTAAGTCGGATGTGAAAGCCCTGGGCTTAACCTGGGAATGGCATTCGAAACTGCAGAGCTAGAGTATGGTAGAGGGAAGTGGAATTTCCGGTGTAGCGGTGAAATGCGTAGATATCGGAAGGAACACCAGTGGCGAAGGCGACTTCCTGGGCCAATACTGACGCTGAGG…
208f3fe33beae2f31f43d53783b38bae	D_0__Bacteria;D_1__Proteobacteria;D_2__Deltaproteobacteria;D_3__Myxococcales;D_4__bacteriap25;D_5__uncultured delta proteobacterium;D_6__uncultured delta proteobacterium	TGGGGAATATTGGACAATAGGCGCAAGCCTGATCCAGCGACGCCGCGTGGGTGATGAAGGCCCTCGGGTTGTAAAGCCCTGTCAGTGGGAACGAATAAGGATAACCTAATACGTTATTTGATGACGGTACCCACAAAGGAAGCACCGGCTAACTCTGTGCCAGCAGCCGCGGTAAGACAGAGGGTGTAAGCGTTGTTCGGAATTACTGGGCGTAAAGGGCACGTAGGCGGTTAGATATGTCTGGTGTGAAAGCCCTCGGCTCAACCGAGGAAATGCACTGGAAACTATCTGACTTGAGTGTGAGAGAGGGTGGCGGAATTCCTGGTGTAGAGGTGAAATTCGTAGATACCAGGAGGAACACCCGAGGCGAAGGCGGCCACCTGGCTCACAACTGACGCT…
8169802814d98e5bb48b1af4214f1362	D_0__Bacteria;D_1__Planctomycetes;D_2__OM190;D_3__uncultured organism;D_4__uncultured organism;D_5__uncultured organism;D_6__uncultured organism	TCGAGAATCTTCCGCAATGGGCGAAAGCCTGACGGAGCGACGCCGCGTGCAGGAAGAAGGCCTTCGGGTTGTAAACTGCTGTCACACGTTAAGAACCGTTGCGGTCTACCGTAACCTGACAAAAGCGTGAGAGGAAGTCACGGCTAACTTCGTGCCAGCAGCCGCGGTAAAACGAAGGTGGCTAGCGTTGTTCGGAATTACTGGGCATAAAGCGCACGTAGGTGGTTGCGTATGTCGATGGTGAAATCCTACAGCTCAACTGTAGAACTGCCATCGAAACTACGTAGCTAGAGGACAGGAGGGGAGAGTGGAATTCCTAGTGTAGCGGTGAAATGCGTAGATATTAGGAGGAACGCCGGTGGCGAAAGCGACTCTCTGGACTGTTTCTGACACTGAGGT…
218b6b5ddc759da2b42d79ee2c1eb59c	D_0__Bacteria;D_1__Bacteroidetes;D_2__Bacteroidia;D_3__Bacteroidales	TGAGGAATATTGGGCAATGGACGCAAGTCTGGCCCAGCCATGCCGCGTGCAGGATGACAGCCCTATGGGTTGTAAACTGCTTTTGTACAAGAAGAAACCTGCGATCGTGATCGTAGTTGACGGTACTGTACGAATAAGCATCGGCTAACTCCGTGCCAGCAGCCGCGGTAATACGGAGGATGCAAGCGTTATCCGGATTTATTGGGTTTAAAGGGTGTGTAGGCGGGACAATAAGTCAGCGGTGAAATCTCTCGGCTTAACCGGGAAACTGCCATTGATACTGTTGTCCTTGAGTACAGTTGAGGTGGGCGGAATGTGTAATGTAGCGGTGAAATGCTTAGATATTACACAGAACGCCAATTGCGAAGGCAGCTCACTAAACTGTTACTGACGCTGAGG…
b72661f3cc7e34313637e4aafad6938f	D_0__Bacteria;D_1__Bacteroidetes;D_2__Bacteroidia;D_3__Chitinophagales;D_4__Saprospiraceae;D_5__uncultured	TAAGGAATATTGGACAATGGGCGAAAGCCTGATCCAGCCATCCCGCGTGCAGGATGAATGCCCTATGGGTTGTAAACTGCTTTTAGATAGGAAGAAACCCTTGGATTTATCCGAGGCTGACGGTACTATCAGAATAAGCACCGGCTAACTCCGTGCCAGCAGCCGCGGTAATACGGAGGGTGCAAGCGTTATCCGGAATCACTGGGTTTAAAGGGTGCGTAGGCGGATAGATAAGTCAGAGGTGAAAGCCTCCCGCTCAACGGGAGAATTGCCTTTGATACTGTTTATCTTGAATAAGGTTGAGGTTAGCGGAATGTGACATGTAGCGGTGAAATGCATAGATATGTCATAGAACACCAATTGCGTAGGCAGCTAGCTAGGCCTTTATTGACGCTGAGG…
afa485b88ab3d750f618651fe75026f2	D_0__Bacteria;D_1__Planctomycetes;D_2__Phycisphaerae;D_3__Phycisphaerales;D_4__Phycisphaeraceae;D_5__Urania-1B-19 marine sediment group	TAACGAATCTTCCGCAATGCGCGAAAGCGTGACGGAGCAATGCCGCGTGCAGGATGAATCCCTTCGGGGTGTAAACTGCTGTCAGAGTTTAGCAACACAATGAGCAGACTCAAAGGAAGGGCCGGCTAACTTCGTGCCAGCAGCCGCGGTAACACGAAGGGCCCGAGCGTTGCGCGGAATCATTGGGCTTAAAGCGTACGTAGGCTGGCGCGCAGGCGTTTTGTGAAAGCCCTCGGCTCAACCGAGGAACTGCTTGGCGAACCGCGCGTCTTGAGGCGGGTAGGGGCTGTCGGAACGATAGGTGGAGTGGTGAAATGCGTTGATATCTATCGGAACGCCAAAGGAGAAATCAGACAGCTGGGCCTGTCCTGACGCTGAGGTACGAAAGCGTGGGGAGCG…
bdcb4f9239fb2eb2337ef911d71d3f1b	D_0__Bacteria;D_1__Planctomycetes;D_2__Planctomycetacia;D_3__Planctomycetales;D_4__uncultured	TCGAGAATCTTCGGCAATGGACGCAAGTCTGACCGAGCGACGCCGCGTGCGGGATGAAGGCCCTTGGGTTGTAAACCGCTGTCAGAGGGGATGAAGTTCCGGAAGGCTATCCTTCCGGTTTGACAAAGCCTCAGAGGAAGCCCGGGCTAAGTACGTGCCAGCAGCCGCGGTAATACGTACTGGGCGAACGTTATTCGGAATCACTGGGCTTAAAGGGTGCGTAGGCGGCCATCCAGGTCTGATGTGAAATCCCACGGCTCAACCGTGGAACTGCGTTGGAAACCGGATGGCTTGAGTGTGTTAGCGGTGTGTGGAACTTCCAGTGGAGCGGTGAAATGTGTTGATATTGGAAGGAACGCCGGTGGCGAAAGCGACACACTGGGGCACAACTGACGCTGA…
0dfd7f84b4e878dfd1e40cbdbc655406	D_0__Bacteria;D_1__Bacteroidetes;D_2__Bacteroidia;D_3__Chitinophagales;D_4__uncultured;D_5__uncultured Bacteroidetes bacterium;D_6__uncultured Bacteroidetes bacterium	TAAGGAATATTGGTCAATGGACGAAAGTCTGAACCAGCCATGCCGCGTGCAGGATGACGGCCCTATGGGTTGTAAACTGCTTTTGTATAGGAAGAAACCTCACTACGTGTAGTGGGCTGACGGTACTATACGAATAAGCACCGGCTAACTCCGTGCCAGCAGCCGCGGTAATACGGAGGGTGCAAGCGTTATCCGGATTTATTGGGTTTAAAGGGTGCGCAGGCGGAAATTTAAGTCAGTGGTGAAAGCCCCGAGCTCAACTTGGGAACTGCCATTGATACTGAATTTCTTGAATATAGTTGAGGCTGGCGGAATACAACATGTAGCGGTGAAATGCATAGATATGTTGTAGAACACCAATTGCGAAGGCAGCTAGCTAAACTATTATTGACGCTGAGG…
7d2ef14dfd88e7829acedc162bf29ce9	D_0__Bacteria;D_1__Proteobacteria;D_2__Deltaproteobacteria;D_3__Bdellovibrionales;D_4__Bdellovibrionaceae;D_5__OM27 clade;D_6__uncultured bacterium	TGGGGAATATTGCGCAATGGGCGAAAGCCTGACGCAGCCAACCCGCGTGAGTGATGAAGGCCTTCGGGTTGTAAAGCTCTGTCGAGAGGGAAGAAACCTGACGGTACCTCTCAAGAAAGCACCGGCTAACTCCGTGCCAGCAGCCGCGGTAATACGGAGGGTGCAAGCGTTGCTCGGAATCACTGGGCGTAAAGGGTCCGCAGGCGGCCGCACAGGTCGGGTGTGAAAGCCCAGGGCTCAACCCTGGAACTGCATCCGAAACCTTGTGGCTTGAGTTCGGGAGAGGAAAGTGGAATTCCTGGTGTAGAGGTGAAATTCGTAGATATCAGGAGGAACACCCGTGGCGAAAGCGGCTTTCTGGCCCGAAACTGACGCTCATGGACGAAAGCGTGGGTAGCA…
b7e7172d60a0d5854b434b61406915f4	D_0__Bacteria;D_1__Actinobacteria;D_2__Actinobacteria;D_3__Corynebacteriales;D_4__Mycobacteriaceae;D_5__Mycobacterium	TGGGGAATATTGCACAATGGGCGCAAGCCTGATGCAGCGACGCCGCGTGAGGGACGACGGCCTTCGGGTTGTAAACCTCTTTCAGCACAGACGAAGCGCAAGTGACGGTATGTGCAGAAGAAGGACCGGCCAACTACGTGCCAGCAGCCGCGGTAATACGTAGGGTCCGAGCGTTGTCCGGAATTACTGGGCGTAAAGAGCTCGTAGGTGGTTTGTCGCGTTGTTCGTGAAAACTCACAGCTTAACTGTGGGCGTGCGGGCGATACGGGCAGACTGGAGTACTGCAGGGGAGACTGGAATTCCTGGTGTAGCGGTGGAATGCGCAGATATCAGGAGGAACACCGGTGGCGAAGGCGGGTCTCTGGGCAGTAACTGACGCTGAGGAGCGAAAGCGTGGGG…
e86151252d915d58e017e9507a3cdb18	D_0__Bacteria;D_1__Actinobacteria;D_2__Acidimicrobiia;D_3__Microtrichales;D_4__Ilumatobacteraceae;D_5__Ilumatobacter	TGGGGAATCTTGCACAATGGGCGCAAGCCTGATGCAGCAACGCCGCGTGCGGGAAGAAGGCCCTAGGGTTGTAAACCGCTTTCAGTAGGGAAGAAAATGACGGTACCTACAGAAGAAGGTGCGGCCAACTACGTGCCAGCAGCCGCGGTGACACGTAGGCACCAAGCGTTATCCGGATTTATTGGGCGTAAAGAGCTCGTAGGCGGTTTGGTAAGTCGGGTGTGAAAACTCTGGGCTCAACCCAGAGAGGCCACCCGATACTGCTATGACTAGAGTACGGTAGGGGAGCGGGGAATTCCTGGTGTAGCGGTGAAATGCGCAGATATCAGGAGGAACACCAGCGGCGAAGGCGCCGCTCTGGGCCGTAACTGACGCTGAGGAGCGAAAGCATGGGTAGCA…
7bf29b9d4da2bd87be4461ed33bbdc34	D_0__Bacteria;D_1__Actinobacteria;D_2__Actinobacteria	TGGGGAATATTGCACAATGGAGGAAACTCTGATGCAGCAACGCCGCGTGAGCGATGAAGGTCTTCGGATCGTGAAGCTCTGTCTTTAGGGATGATAATGACAGTACCTAAGGAGGAAGCCACGGCTAACTACGTGCCAGCAGCCGCGGTAATACGTAGGTGGCAAGCGTTATCCGGAATTATTGGGCGTAAAGAGCTCGTAGGCGGCTTGGTAAGTCAACGGTGAAATTTCGAGGCTCAACTTCGAAACTGCCGTCGAAACTGCCATGGCTTGAGGTAGGTAGGGGAGTGTGGAATTCCTGGTGTAGCGGTGAAATGCGCAGATATCAGGAGGAACACCAGTGGCGAAGGCGGCACTCTGGGCCTTACCTGACGCTGAGGAGCGAAAGCTAGGGGAGCA…
170fc3e69beb45f8c408cd414c8c0887	D_0__Bacteria;D_1__Elusimicrobia;D_2__Elusimicrobia;D_3__MVP-88;D_4__metagenome;D_5__metagenome;D_6__metagenome	TGGGGAATTTTGCGCAATGGGGGAAACCCTGACGCAGCAATGCCGCGTGGAGGACGAAGGTCTTCGGATTGTAAACTCCTTTTGCCGGTGACAAATGACCATGTGAATAACATGGGATGATGGTAACCGGTGAATAAGCCACGGCTAACTTCGTGCCAGCAGCCGCGGTAAGACGAAGGTGGCGAGCGTTACTCGGAATTACTAGGCGTAAAGCGTGGGCAGGCGGCTCGACAAGTCTTTTGTGAAAGCCTTGGGCTCAACCCAGGGAGGTCAAAGGAAACTGTCGGGCTTGGATGTGGGAGAGGTCACTGGAATTCCTGGTGTAGCGGTGAAATGCGTAGATATCAGGAGGAACACCAATGGCGAAGGCAGGTGACTGGACCACTATCGACGCTCATC…
b78b61d5e00692077bebda99d0cb623d	D_0__Bacteria;D_1__Proteobacteria;D_2__Deltaproteobacteria;D_3__Myxococcales;D_4__Haliangiaceae;D_5__Haliangium	TGGGGAATATTGGACAATGGGCGAAAGCCTGATCCAGCCATGCCGCGTGAGTGATGAAGGCCCTCGGGTCGTAAAGCTCTGTGGGGAGGGACGAATGGCCGGTAGTTAATACCTGCCGGTTTGACGGTACCTCCTTAGCAAGCACCGGCTAACTCCGTGCCAGCAGCCGCGGTAATACGGAGGGTGCAAACGTTGCTCGGAATCATTGGGCGTAAAGCGCACGTAGGCGGTCCGTTAAGTCGGATGTGAAAGCCCTCGGCTCAACCGAGGAAGTGCATTCGAAACTGTCGGACTTGAGTATGGGAGAGGGTCGCGGAATTCCCGGTGTAGAGGTGAAATTCGTAGATATCGGGAGGAACACCAGAGGCGAAGGCGGCGACCTGGACCAATACTGACGCT…
c94c4a7a27e78c7ef586a66ca58e584b	D_0__Bacteria;D_1__Chloroflexi;D_2__JG30-KF-CM66	CAAGGAATTTTGCACAATCGACGCAAGTCGGATGCAGCAACGCCGCGTGGGGGAAGAAGGCTTTCGAGTCGTAAACCCCTTTTGCGAGGGAAGAAGATCTGACGGTACCTCGCGAATAAGTCACGGCTAACTACGTGCCAGCAGCCGCGGTAATACGTAGGTGGCAAACGTTGTCCGGATTCACTGGGCGTAAAGCGCGCGCAGGCGGGCTGATCAGTCTGGGGTGAAATCTCTCGGCTCAACCGAGAGAGGCCCTCAGATACTGTCAGCCTTGAGGTGCCTAGAGGAGAGTGGAATTCAGGGTGTAGTGGTGGAATGCGTAGATATCCTGAGGAACACCAGTGGCGAAGGCGACTCTCTGGGGGCATTCTGACGCTGAGGCGCGAAAGCGTGGGGAGC…
f6b319b42722395d1e4ee1e2e0f7aa83	D_0__Bacteria;D_1__Patescibacteria;D_2__Parcubacteria;D_3__GWA2-38-13b;D_4__uncultured bacterium;D_5__uncultured bacterium;D_6__uncultured bacterium	TGAGGAATTTTGCACAATGGACGAAAGTCTGATGCAGCGACGCCGCGTGACTGAAGAAGCCCTTCGGGGTGTAAAAGTCTTTTCTAAGGGACGAAATTTTGACGGTACCTTAGGAATAAGCAACGGCTAACCTCGTGCCAGCAGCCGCGGTAAGACGAGGGTTGCAAGCGTTATCCGGAATCATTGGGCGTAAAGCGTCTGTAGGTGTCTTTGTAAGTTTCTTGTGAAATCCCAGTGCTCAACATTGGGGCTGCAGGAAATACTACAAAGATTGAGGAAGATAGAGGTAAGCGGAATTTCTGGTGTAGCAGTGAAATGCGTTAATATCAGAAGGAACACCAATAGCGAAGGCAGCTTACTGGATCTTTCCTGACACTGAGAGACGAAAGCGTGGGTAGC…
35f21cea82ace5f966f60eaf93676a78	D_0__Bacteria;D_1__Patescibacteria;D_2__Gracilibacteria;D_3__Absconditabacteriales (SR1);D_4__uncultured organism;D_5__uncultured organism;D_6__uncultured organism	TGGGGAATCTTGCGCAATGGACGAAAGTCTGACGCAGCAATCCCGCGTGGAGGATGACGCATTATGGTGTGTAAACTCCTTTTCTGGTGGAAGACGAATGACGGTACACCAGGAATAAGGGACGGCTAACTACGTGCCAGCAGCCGCGGTAATACGTAGGTCCCAAGTGTTATCCGGAATTACTGGGCGTAAAGCGTCTGTAGCCGGGTTTGTAAGTCTGTTTTCAAATACTATGGCTTAACCATAGAAAGGGAATGGATACTGCAAACCTAGAGATTACTAGGGGTTGGTGGAATTTCCGGTGGAGCGGTGAAATGCGTTGATATCGGAAGGAACGCCAAAAGCGAAAGCAGCCAACTATAGTAAATCTGACGGTCAGAGACGAAAGCTTGGGGAGCG…
438273996c8f8b5c99e812b7be09b267	D_0__Bacteria;D_1__Bacteroidetes;D_2__Bacteroidia;D_3__Flavobacteriales;D_4__Flavobacteriaceae;D_5__uncultured;D_6__uncultured deep-sea bacterium	TGAGGAATATTGGACAATGGAGGCAACTCTGATCCAGCCATGCCGCGTGCAGGAAGACTGCCCTATGGGTTGTAAACTGCTTTTATATAGGAAGAAACGTCCCTTCGCGAAAGGGATTTGACGGTACTATAAGAATAAGGACCGGCTAACTCCGTGCCAGCAGCCGCGGTAATACGGAGGGTCCGAGCGTTATCCGGAATCATTGGGTTTAAAGGGTCCGTAGGCGGGCGTCTAAGTCAGTGGTGAAATCTTACAGCTCAACTGTAAAATTGCCATTGATACTGGATGTCTTGAATTAGTGTGAAGTGGCTAGAATGTGTAGTGTAGCGGTGAAATGCATAGATATTACACAGAATACCAATTGCGAAGGCAGATCACTAACACTATATTGACGCTGAG…
3987da2013221a7b8deba8154156b176	D_0__Bacteria;D_1__Planctomycetes;D_2__Planctomycetacia;D_3__Pirellulales;D_4__Pirellulaceae;D_5__Rhodopirellula;D_6__uncultured bacterium	TCGAGAATCTTCCGCAATGGACGAAAGTCTGACGGAGCGACGCCGCGTGCGGGATGAAGGCTTTCGGGTTGTAAACCGCTGTCAGTGGGGAGCAAATGCATAGGGGCTATCCTCTATGTTTGAGCGATCCGCAGAGGAAGCACAGGCTAAGTTCGTGCCAGCAGCCGCGGTAACACGAACTGTGCAAACGTTATTCGGAATCACTGGGCTTAAAGAGTCCGTAGGCTGCTTAGTAGGTGGGGTGTGAAATCCCACGGCTCAACCGTGGAATAGCGCTCCAAACCACTAAGCTTGAGGGAGATAGAGGAGAGCGGAACTGATGGTGGAGCGGTGAAATGCGTTGATATCATCAGGAACACCGGTGGCGAAAGCGGCTCTCTGGGTCTCTTCTGACGCTGA…
407dc51a63df3d6b14f198b4169a7b40	D_0__Bacteria;D_1__Proteobacteria;D_2__Alphaproteobacteria	TGGGGAATATTGCGCAATGGGGGAAACCCTGACGCAGCCATGCCGCGTGAGTGAAGAAGGCCTTAGGGTTGTAAAACTCTTTCAGTAGGGAAGATAATGACGGTACCTACAGAAGAAGCCCCGGCCAACTCCGTGCCAGCAGCCGCGGTAATACGGAGGGGGCTAGCGTTGTTCGGAATTACTGGGCGTAAAGCGCGCGTAGGCGGGCTGGTTAGTTGGGGGTGAAATCCCGGGGCTCAACCCCGGAACTGCCCTCAATACTGCCAGTCTTGAGTTCGAGAGAGGTGAGTGGAATTCCTAGTGTAGAGGTGAAATTCGTAGATATTAGGAAGAACACCAGTGGCGAAGGCGGCTCACTGGCTCGATACTGACGCTGAGGCGCGAAAGCGTGGGGAGCAA…
ed40a972a73933ac44ae42889616f983	D_0__Bacteria;D_1__Planctomycetes;D_2__OM190;D_3__uncultured bacterium;D_4__uncultured bacterium;D_5__uncultured bacterium;D_6__uncultured bacterium	TCGAGAATCTTCCGCAATGGACGCAAGTCTGACGGGGCGACGCCGCGTGGGGGATGAAGGCTCTCGGGTTGTAAACCCCTGTTGCACGCTAGGAATATCTGTGGGTTAATAGCCTTGCAGGTTGACCATCGTGTGAGGAAGCACAGGCTAACTCCGTGCCAGCAGCCGCGGTAATACGGAGTGTGCAAGCGTTACTCGGAATCACTGGGCATAAAGAGCACGTAGGCTGGCTGCTTAGTCGGTGGTGAAAGCCCTCAGCTCAACTGAGGAATTGCTCCCGAAACTGGTAGCCTTGAGGACAAGAGGGGAGAGTGGAACTTCTGGTGGAGCGGTGAAATGCGTAGATATCAGAAGGAACACCGGTGGCGAAAGTGACTCTCTGGCTTGTTTCTGACGCTG…
bb1cfa81b2e4e29b8919c01e27b81efd	D_0__Bacteria;D_1__Patescibacteria;D_2__Parcubacteria;D_3__Candidatus Kaiserbacteria;D_4__uncultured Parcubacteria group bacterium;D_5__uncultured Parcubacteria group bacterium;D_6__uncultured Parcubacteria group bacterium	CCGAGAATATTCCGCAATGGACGAAAGTCTGACGGAGCGACGCCGCGTGCAGGATGACGGCCTTCGGGTTGTAAACTGCTTTTATGAGGGAGGAAATTTTGACGTTACCTCATGAATAAGGAGCTCCTAATTCCGTGCCAGCAGGAGCGGTCATACGGAAGCTTCGAGCGTTACCCGGAATCACTGGGCGTAAAGGGTGTGTAGGTGGTTGTATTAGTCTTCTGTTAAAGGTCCGGGCTCAACCCGGGAAATGCGGAGGAAACGGTACAACTAGAGGATATGAGAGGTGTGCGGAACTCATGGTGTAGGGGTGAAATCCGTTGATATCATGGGGAACACCAAAGGCGAAGGCAGCACACTGGCATATTCCTGACACTGAGACACGAAAGCGTGGGTAGC…
a33c32bc5abf6fdb0131aa5bfb1d6722	D_0__Bacteria;D_1__Bacteroidetes;D_2__Bacteroidia;D_3__Bacteroidales;D_4__Bacteroidetes BD2-2;D_5__uncultured bacterium;D_6__uncultured bacterium	TGAGGAATATTGGTCAATGGGCGAGAGCCTGAACCAGCCAAGCCGCGTGCAGGATGACTGCCCTATGGGTTGTAAACTGCTTTTATATAGGAAGAAAAAAGGTTATTCTTAACCTACTGACGGTACTATATGAATAAGCATCGGCTAACTCCGTGCCAGCAGCCGCGGTAATACGGAGGATGCAAGCGTTATCCGGATTCATTAGGTTTAAAGGGTGCGCAGGCGGTATAATAAGTCAGTGGTGAAATCCTGTGGCTTAACCATAGAATTGCCATTGATACTGCTATACTTGAGTATAGTTGAGGTAAGCGGAATGTGTAATGTAGCGGTGAAATGCTTAGATATTACACAGAACACCGATTGCGTAGGCAGCTTACTAAACTATAACTGACGCTCATG…
d904edf6e2e99ac469faf2d0144065bb	D_0__Bacteria;D_1__Proteobacteria;D_2__Gammaproteobacteria;D_3__Thiomicrospirales;D_4__Thiomicrospiraceae;D_5__endosymbionts	CCGCGGTAATACAGAGGGTGCAAGCGTTAATCGGAATTACTGGGCGTAAAGCGCGCGTAGGTGGTTTGATAAGTTGGATGTGAAATCCCCGGGCTTAACCTGGGTCGGTCATTCAAAACTGTCAGACTAGAGTATGGTAGAGGGTAGTGGAATTCCTAGTGTAGCGGTGAAATGCGTAGATATTAGGAGGAACACCAGTGGCGAAGGCGACTGCCTGGACTGATACTGACACTGAGGTGCGAAAGCGTGGGTAGCGAACA
d0cd094ff4e5c87982d0d27dcdb74d20	D_0__Bacteria;D_1__Planctomycetes;D_2__Planctomycetacia;D_3__Pirellulales;D_4__Pirellulaceae;D_5__Pir4 lineage;D_6__uncultured bacterium	TCGAGAATCTTCGGCAATGGGCGCAAGCCCGACCGAGCGACGCCGCGTGTGGGATGAAGGCCTTCGGGTTGTAAACCGCTGTCAGTGGGGAGGAAATCTGTAGGGGCTATCCCCTATGGTTGACCTATCTTCAGAGGAAGGACGGGCTAAGTTCGTGCCAGCAGCCGCGGTAAGACGAACCGTCCAAACGTTATTCGGAATCACTGGGCTTAAAGGGTGCGTAGGCGGCGCTGTAAGTCGGGTGTGAAATCCCACGGCTCAACCGTGGAATTGCGCCCGATACTGCAGTGCTTGAGGGAGACAGGGGTGAGTGGAACTGATGGTGGAGCGGTGAAATGCGTTGATATCATCAGGAACACCGGTGGCGAAAGCGGCTCACTGGGTCTCTTCTGACGCTGA…
a961a02b307376f58ae368698edcd99d	D_0__Bacteria;D_1__Proteobacteria;D_2__Gammaproteobacteria;D_3__Gammaproteobacteria Incertae Sedis;D_4__Unknown Family;D_5__uncultured	TGGGGAATATTGCACAATGGGCGCAAGCCTGATGCAGCAATGCCGCGTGTGTGAAGAAGGCCTGCGGGTTGTAAAGCACTTTTATTAGGAAAGAAAAACACGTAGTTAATACCTACGGACTTGACGGTACCTAAAGAATAAGCACCGGCTAACTCAGTGCCAGCAGCCGCGGTAATACTGAGGGTGCAAGCGTTAATCGGAATTACTGGGCGTAAAGCGAGTGTAGGCGGCTTCGTAAGTCGGATGTGAAAGCCCTGGGCTTAACCTGGGAATTGCATTCGATACTGCGCGGCTAGAGTTTGATAGAGGGAAGTGGAATTCCAGGTGTAGCGGTGAAATGCGTAGATATCTGGAGGAACACCAGTGGCGAAGGCGGCTTCCTGGATCAAAACTGACGCT…
8fce6628646ecefee43d611eef66c907	D_0__Bacteria;D_1__Bacteroidetes;D_2__Bacteroidia	TAGGGAATATTGGGCAATGGACGCAAGTCTGACCCAGCCATGCCGCGTGCAGGATTGACGGCCCTATGGGTTGTAAACTGCTTTTCTGCAGGAAGAACTCCCCCTACGTGTAGGGGGCTGACGGTACTGCAGGAATAAGCATCGGCTAACTCCGTGCCAGCAGCCGCGGTAATACGGAGGATGCAAGCGTTATCCGGATTTATTGGGTTTAAAGGGTGCGCAGGCGGACTAATAAGTCAGAGGTGAAATCCCACAGCTTAACTGTGGAACTGCCTTTGATACTGTTAGTCTTGAGTGCAGTTGAGGTAGGCGGAATGTGTTATGTAGCGGTGAAATGCTTAGATATGACACAGAACACCAATCGTGAAGACAGCTTACCAAGCTGCTACTGACGCTCAG…
6525902d197b6d6c73796ac723a229bf	D_0__Bacteria;D_1__Planctomycetes;D_2__OM190;D_3__uncultured organism;D_4__uncultured organism;D_5__uncultured organism;D_6__uncultured organism	TCGAGAATCTTCCGCAATGGGCGCAAGCCTGACGGAGCGACGCCGCGTGCAGGAAGAAGGCCTTCGGGTTGTAAACTGCTGTCACACGTTAAGAAAAGTTGCGGTCTACCGTAACCTGACAAAAGCGTGAGAGGAAGTCACGGCTAACTTCGTGCCAGCAGCCGCGGTAAAACGAAGGTGGCAAGCGTTGTTCGGAATTACTGGGCATAAAGCGCACGTAGGTGGTTGCGTATGTCGATGGTGAAATCCTACAGCTCAACTGTAGAACTGCCATCGAAACTACGTGGCTAGAGGACAGGAGGGGAGAGTGGAATTCCTAGTGTAGCGGTGAAATGCGTAGATATTAGGAGGAACGCCGGTGGCGAAAGCGACTCTCTGGACTGTTTCTGACACTGAGGT…
aa5baa02fbe9497221e10d1a62d1de9d	D_0__Bacteria;D_1__Omnitrophicaeota;D_2__uncultured bacterium;D_3__uncultured bacterium;D_4__uncultured bacterium;D_5__uncultured bacterium;D_6__uncultured bacterium	TCGAGAATCTTTTGCAATGGGCGAAAGCCTGACAATGCGACGCCGCGTGAGCGATGAAGGCCTTCGGGTCGTAAAGCTCTGTTTGCCGGGAAGAAAGACGTTGCCGAATAGGCCAACGGGATGACGGTACCGGCAGAGGAAGCCACGGCTAACTCCGTGCCAGCAGCCGCGGTAATACGGGGGTGGCAAGCGTTGTTCGGAATTACTGGGTGTAAAGGGTATGTAGGCGGTATGGTAAGTTGAATGTGAAATCCTTTGGCTCAACCAAAGAACTGCATTCAATACTGCCTTACTTGAGTTCGGGAGAGGAGAGCGGAATTCCAGGTGTAAGAGTGAAATCTGTAGATATCTGGAGGAACACCAGTGGCGAAAGCGGCTCTCTGGACCGATACTGACGCT…
a94456ae1c15ef79c8e29833848a1aff	D_0__Bacteria;D_1__Proteobacteria;D_2__Gammaproteobacteria;D_3__Chromatiales;D_4__Sedimenticolaceae;D_5__uncultured;D_6__uncultured deep-sea bacterium	TGAGGAATATTGGGCAATGGACGCAAGTCTGACCCAGCAATACCGCATGAGTGATGAAGGTCTTAGGATTGTAAAGTTCTTTCAGTAGGGAAGATAATGACGGTACCTACAGAAGAAGTCCCGGCTAACTCCGTGCCAGCAGCCGCGGTAAGACGGAGGGGGCTAGCGTTGTTCGGAATTACTGGGCGTAAAGCGCTCGTAGGCGGTTTGTTAAGTCGGATGTGAAAGCCCCGGGCTCAACCTGGGAACTGCATTCGATACTGGCAAACTAGAGTATAGAAGAGGCAAGTGGAATTCCGGGTGTAGCGGTGAAATGCGTAGATATCCGGAGGAACATCAGTGGCGAAGGCGACTTGCTGGTCTAATACTGACGCTGAGGAGCGAAAGCGTGGGGAGCAA…
454e23ceeb3b69f3b8287e0d779d597f	D_0__Bacteria;D_1__Bacteroidetes;D_2__Bacteroidia;D_3__Sphingobacteriales;D_4__Lentimicrobiaceae;D_5__uncultured Bacteroidetes bacterium;D_6__uncultured Bacteroidetes bacterium	TAAGGAATATTGGTCAATGGACGAAAGTCTGAACCAGCCATGCCGCGTGCAGGATGACGGCCCTACGGGTTGTAAACTGCTTTTATACGGGAAGAATCCCCTGTACGTGTACAGGGTTGACGGTACCGTACGAATAAGGATCGGCTAACTCCGTGCCAGCAGCCGCGGTAATACGGAGGATCCAAGCGTTATCCGGATTTATTGGGTTTAAAGGGTGCGTAGGCGGAATGATAAGTTAGTGGTGAAATCCCTCGGCTCAACCGAGGAACTGCCATTAATACTGTCATTCTTGAGTATAGTTGAAGTGGGCGGAATGTATCATGTAGCGGTGAAATGCTTAGATATGATACAGAACACCGATAGCGTAGGCAGCTTGCTAAACTATAACTGACGCTCAGG…
3f0ab74276ac611425a63e57ba11465f	D_0__Bacteria;D_1__Proteobacteria;D_2__Alphaproteobacteria;D_3__Rhodovibrionales;D_4__Kiloniellaceae;D_5__uncultured;D_6__uncultured Rhodospirillaceae bacterium	TGGGGAATATTGGACAATGGGCGCAAGCCTGATCCAGCCATGCCGCGTGAGTGAAGAAGGCCTTAGGGTTGTAAAGCTCTTTCACCGGTGAAGATGATGACGGTAGCCGGAGAAGAAGCCCCGGCTAACTCCGTGCCAGCAGCCGCGGTAATACGGAGGGGGCGAGCGTTGTTCGGAATTACTGGGCGTAAAGGGCGCGTAGGCGGGATATCGTGTCAGGGGTGAAAGTCCTGGGCTCAACCTGGGGACTGCCTTTGAAACTGATATTCTTGAGACCGGGAGAGGATGGCGGAATTCCCAGTGTAGAGGTGAAATTCGTAGATATTGGGAAGAACACCGGTGGCGAAGGCGGCCATCTGGACCGGATCTGACGCTGAGGCGCGAAAGCGTGGGGAGCAA…
f0fbcbe59ec36887f58538803e7bf08d	D_0__Bacteria;D_1__Bacteroidetes;D_2__Bacteroidia;D_3__Bacteroidetes VC2.1 Bac22;D_4__uncultured Bacteroidetes bacterium;D_5__uncultured Bacteroidetes bacterium;D_6__uncultured Bacteroidetes bacterium	TAAGGAATATTGGTCAATGGGCGCAAGCCTGAACCAGCCATGCCGCGTGCAGGAAGACGGCCTTATGGGTTGTAAACTGCTTTTATATAGGAATAAACTCCCGATCGTGATCGGGGCTGAAGGTACTATACGAATAAGGACCGGCTAACTCCGTGCCAGCAGCCGCGGTAATACGGAGGGTCCAAGCGTTATCCGGATTTATTGGGTTTAAAGGGTGCGCAGGCGGACCTATCAGTCAGTGGTGAAATCCCGGGGCTCAACTCCGGAACTGCCATTGATACTGTAGGTCTTGAGTTTGGTTGAAGTGGGCGGAATGTAGCATGTAGCGGTGAAATGCATAGATATGCTACAGAACACCGATCGCGAAGGCAGCTCACTAAGCCAATACTGACGCTCAGG…
734b9d8b3e02e6dc7ad8aaa985986e67	D_0__Archaea;D_1__Nanoarchaeaeota;D_2__Woesearchaeia;D_3__uncultured archaeon;D_4__uncultured archaeon;D_5__uncultured archaeon;D_6__uncultured archaeon	GCGCGAAACCTTTACAATGCACGAAAGTGTGATAAGGGAATTCTAAGTGCTTTGCTTTTGTAAGGCTTTTTTTAAGAGTAAATATCTTAGAGAATAAGTGGTGGGTAATACCTGTGCCAGCCGCCGCGGTAATCCAGGAGCCACAAGTGGCAACCATTTTTATTGGGCCTAAAGCGTCCGTAGCATGTTTAGTAAATCTTCTGTGAAATCATTAGGCTTAACTTAATGACGTGCAGAAGAGACTGCTTGACTCGGGACCGGGAGGAGTCAGAGGTATTTTGGGGGGAGCGGTAAAATGCTATAATCCTCGAAGGACCACCTGTGGCGAAGGCGTCTGACCAGAACGGATCCGACAGTGAGGGACGAAAGCTAGGGGAGCAATCC
e178b8a1c0a2a821fd6af6f5cf15d2c9	D_0__Bacteria;D_1__Bacteroidetes;D_2__Bacteroidia;D_3__Chitinophagales;D_4__Saprospiraceae;D_5__uncultured	TAAGGAATATTGGACAATGGGCGCAAGCCTGATCCAGCCATGCCGCGTGCAGGAAGACGGCCCTACGGGTTGTAAACTGCTTTTGTATGGGAAGAATGGCCCCGACGTGTCGGGGAAGAGACGGTACCATAAGAATAAGCACCGGCTAACTCCGTGCCAGCAGCCGCGGTAATACGGAGGGTGCAAGCGTTATCCGGAATTACTGGGTTTAAAGGGTGCGTAGGCGGCTAAATAAGTCAGGAGTGAAAATTGCCCGCTAAACGGGTAACGTGCTTTTGATACTGTTTAGCTTGAATAAGGTTGAGGTTAGCGGAATGTGGCATGTAGCGGTGAAATGCATAGATATGCCATAGAACACCAATTGCGAAGGCAGCTGGCTAGACCTATATTGACGCTGAG…
6ba6737ee53de1f4a0fbb1d471481d15	D_0__Bacteria;D_1__Chloroflexi;D_2__Anaerolineae;D_3__Anaerolineales;D_4__Anaerolineaceae;D_5__uncultured	TAAGGAATATTGGGCAATGGACGCAAGTCTGACCCAGCCATGCCGCGTGCAGGATGACGGCCTTATGGGTTGTAAACTGCTTTTGTTTGGGAAGAACACTATGTACGTGTACGTAGGTGACGGTACCAGGAATAAGGATCGGCTAACTACGTGCCAGCAGCCGCGGTAACACGTAGGATTCAAGCGTTATCCGAATTTACTGGGCGTAAAGCGCGTGTAGGCGGTTCGGTAAGTTGGACGTGAAAGCTCCTGGCTCAACTGGGAGAGGTCGTTCAAAACTTCCGGACTAGAGGACGGTAGAGGGAGGTGGAATTCCCGGTGTAGTGGTGAAATGCGTAGATATCGGGAGGAACACCAGTGGCGAAGGCGGCCTCCTGGGCCGTTCCTGACGCTCAGACG…
f3f9df021478773962144e12e6db1ec2	D_0__Bacteria;D_1__Patescibacteria;D_2__Parcubacteria;D_3__Candidatus Yanofskybacteria;D_4__uncultured organism;D_5__uncultured organism;D_6__uncultured organism	TCAAGAACCTTGGACAATGGACGAAAGTCTGATCCAGCGACGCCGCGTGCGGGATGAAGTTCTTCGGAATGTAAACCGCTTTTTATCGGGAAGAACTCTGACGGTACCGATAGAATAAGGGGCCGCTAACCTCGTGCCAGCAGCGGCGGTAATACGAGGGCCCCGAGCGTTATCCGGATTTACTGGGCGTAAAGCGCGCGTAGTCGGCTTAGATAGTCTGATGTTAAATTTCAGGGCTCAACCCTGAAACCGCATTGGAAACGTTTAAGCTAGAGTGAACAAGAGGTAGGCGGAACGTGTAGTGTAGCGGTGAAATGCGTTGATATTACACGGAACACCAAAAGCGAAGGCAGCCTACTGGTGTTTTACTGACGATGAGGTGCGAAAGTGTGGGTATCG…
a9498aaeada6ca6bb1eb42633691a272	D_0__Bacteria;D_1__Proteobacteria;D_2__Alphaproteobacteria;D_3__Rhodobacterales;D_4__Rhodobacteraceae;D_5__Shimia	TGGGGAATCTTGGACAATGGGCGCAAGCCTGATCCAGCCATGCCGCGTGAGTGATGAAGGCCTTAGGGTCGTAAAGCTCTTTCGCCAGGGATGATAATGACAGTACCTGGTAAAGAAACCCCGGCTAACTCCGTGCCAGCAGCCGCGGTAATACGGAGGGGGTTAGCGTTGTTCGGAATTACTGGGCGTAAAGCGTACGTAGGCGGGTTGTTAAGTTAGAGGTGAAATCCCAGGGCTCAACCCTGGAACTGCCTTTAATACTGGCAACCTAGAGTTCGAGAGAGGTGAGTGGAATTCCGAGTGTAGAGGTGAAATTCGTAGATATTCGGAGGAACACCAGTGGCGAAGGCGGCTCACTGGCTCGATACTGACGCTGAGGTACGAAAGTGTGGGGAGCAA…
85da45efe5fb9939fec20e49fb41ffa7	D_0__Bacteria;D_1__Planctomycetes;D_2__Planctomycetacia;D_3__Pirellulales;D_4__Pirellulaceae;D_5__Pir4 lineage	TCGAGAATCTTCGGCAATGGGCGAAAGCCTGACCGAGCAATGCCGCGTGCGGGATGAAGGCCCTCGGGTTGTAAACCGCTGTCAGTTGGGAGGAAATTGCATAGGGCTATCCCTATGTATTGACCTATCTTCAGAGGAAGGACAGGCTAAGTTCGTGCCAGCAGCCGCGGTAATACGAACTGTCCAAACGTTATTCGGAATCACTGGGCTTAAAGGGTGCGTAGGCGGTCCGGCAAGTTGGGTGTGAAATCCCTCGGCTCAACCGAGGAATGGCGCTCAAAACTGCCGGACTAGAGGGAGACAGAGGTGAGCGGAACTTGCGGTGGAGCGGTGAAATGCGTTGATATCGCAAGGAACGCCAGTAGCGAAGGCGGCTCACTGGGTCTCTTCTGACGCTGA…
ffbf69b7206ddcbfb480338a480772c3	D_0__Bacteria;D_1__Planctomycetes;D_2__Planctomycetacia;D_3__Planctomycetales;D_4__Gimesiaceae;D_5__uncultured;D_6__uncultured bacterium	TCGAGAATCTTCGGCAATGGACGAAAGTCTGACCGAGCGACGCCGCGTGCGGGATGAAGGCCCTTGGGTTGTAAACCGCTGTCAGAGGGGATGAAATGCGGGAGGGTTCTCCCTTCCGTTTGACAGAGCCTCAGAGGAAGCACGGGCTAAGTACGTGCCAGCAGCCGCGGTAACACGTACTGTGCAAACGTTATTCGGAATCACTGGGCTTAAAGGGTGCGTAGGCGGCTGGATAAGTAGGGTGTGAAATCCCTCGGCTCAACCGAGGAACTGCGCTCTAAACTGTCCAGCTTGAGTGAGATAGGGGTGTGCGGAACTTCCAGTGGAGCGGTGAAATGTGTTGATATTGGAAGGAACGCCGGTGGCGAAAGCGGCACACTGGGTCTCAACTGACGCTGA…
dfda558c4af8634c9d6cafc3ba04dc88	D_0__Bacteria;D_1__Planctomycetes;D_2__Planctomycetacia;D_3__Pirellulales;D_4__Pirellulaceae	TCGAGAATCTTCGGCAATGGACGAAAGTCTGACCGAGCGACGCCGCGTGCGGGATGAAGGCCTTCGGGTTGTAAACCGCTGTCAGTTGGGAGGAAATCATGTGGGGTTCTCCCCATGTGTTGACCTATCTTCAGAGGAAGTACGGGCTAAGTTCGTGCCAGCAGCCGCGGTAACACGAACCGTACAAACGTTATTCGGAATCACTGGGCTTAAAGGGTGCGTAGGCGGCTTGGAAAGTTGGGTGTGAAATCCCTCGGCTCAACCGAGGAATTGCGCTCAAAACTTCCAAGCTAGAGGGAGACAGAGGTGAGCGGAACTTAGGGTGGAGCGGTGAAATGCGTTGATATCCTAAGGAACACCGGTGGCGAAGGCGGCTCACTGGGTCTCTTCTGACGCTGA…
7b2b7791c6d9acd263b16352f955b2ab	D_0__Bacteria;D_1__Spirochaetes;D_2__Leptospirae;D_3__Leptospirales;D_4__Leptospiraceae;D_5__RBG-16-49-21;D_6__uncultured bacterium	TTAAGAATCTTGCGCAATGGGCGAAAGCCTGACGCAGCGACGCCGCGTGGATGATGAAGGCCTTCGGGTTGTAAAGTCCGGTAAGCAGGGAAGAATAAGCAAGAGGTAATATTTCTTGTGATGACGGTACCTGCCTAAAGCCCCGGCTAACTACATGCCAGCAGCCGCGGTAATACGTATGGGGCAAGCGTTGTTCGGAATTATTGGGCGTAAAGGGCATCTAGGCGGGGAATTAAGTTAGGTGTGAAATCCATGGGCTCAACCCGTGAATTGCATCTAAAACTGGTTCTCTTGAGTTAGGGAGAGGAAAGCAGAATTCCTGGTGTAGCGGTGGAATGCGTAGATATCAGGAGGAATACCAGTGGCGGAGGCGGCTTTCTGGCCTATAACTGACGCTGA…
156c96232ee0eeff869ff35f4ac01d7f	D_0__Bacteria;D_1__Proteobacteria;D_2__Gammaproteobacteria;D_3__Gammaproteobacteria Incertae Sedis;D_4__Unknown Family;D_5__uncultured	TGGGGAATATTGCACAATGGGCGCAAGCCTGATGCAGCAATGCCGCGTGTGTGAAGAAGGCCTGCGGGTTGTAAAGCACTTTTATCGGGAAAGAAAAAATCAGGGTTAATACCCCTGATCTTGACGGTACCCGAAGAATAAGCACCGGCTAACTCCGTGCCAGCAGCCGCGGTAATACGGAGGGTGCAAGCGTTAATCGGAATTACTGGGCGTAAAGCGAGTGTAGGCGGCTTCGTAAGTCGGATGTGAAAGCCCCGGGCTTAACCTGGGAATTGCATTCGATACTGCGCGGCTAGAGTTTGATAGAGGGAAGTGGAATTCCAGGTGTAGCGGTGAAATGCGTAGATATCTGGAGGAACACCAGTGGCGAAGGCGGCTTCCTGGATCAAAACTGACGCT…
ab37cf6c7878f29d4adf482a4ab820b2	D_0__Bacteria;D_1__Bacteroidetes;D_2__Bacteroidia;D_3__Chitinophagales;D_4__uncultured;D_5__uncultured Bacteroidetes bacterium;D_6__uncultured Bacteroidetes bacterium	TAGGGAATATTGGTCAATGGGGGCAACCCTGAACCAGCCATGCCGCGTGGAGGAAGACGGCCCTCTGGGTTGTAAACTTCTTTTATATGGGGATAAGTCTGTTCTATACGAGCAGTTGAAGGTACCATATGAATAAGCACCGGCTAACTCCGTGCCAGCAGCCGCGGTAATACGGAGGGTGCAAGCGTTGTCCGGATTTATTGGGTTTAAAGGGTGCGTAGGCGGCACAGTAAGTCAGTGGTGAAATTTTGCGGCTCAACCGTAAAACTGCCATTGATACTGTTGTGCTAGAGTACAAGTGAGGTGGTTGGAATGCGTAGTGTAGCGGTGAAATGCATAGATATTACGCAGAACGCCAATTGCGAAGGCAGACCACTAACTTGTAACTGACGCTGATGC…
02509ba8d91ef55d40d698259baacb0b	D_0__Bacteria;D_1__TA06;D_2__uncultured bacterium;D_3__uncultured bacterium;D_4__uncultured bacterium;D_5__uncultured bacterium;D_6__uncultured bacterium	TCTAGAAATTTGCGCAATGGGTGAAAGCCTGACGCAGCGACGCCGCGTGGGGGATGAATGCCTTCGGGTTGTAAACCCCTGTCAGGGGGGACGATGTTCCGAGCAATCGGAGTGACGGTACTCCCAGAGGAAGCTCCGGCTAACTCCGTGCCAGCAGCCGCGGTAAGACGGAGGGAGCAAGCGTTGTCCAAAATCACTGGGCGTAAAGGGGATGTAGGTGTCTCGGTAAGTTGGGTGTGGAATCCCTCTGCTTAACGGAGGAATTGCATTCAAAACTGTCGAGATTGAGCACGGGAGAGGAGAGCGGAACTCTCAGTGTAGCGGTGGAATGCGTTGATGTTGAGAGGAACACCGATGGCAAAGGCAGCTCTCTGGACCGTTGCTGACACTGAGGTCCGA…
d86ab28e09eb83d6c544d4e4fc570f7d	D_0__Bacteria;D_1__Bacteroidetes;D_2__Bacteroidia;D_3__Flavobacteriales;D_4__Cryomorphaceae;D_5__uncultured;D_6__uncultured bacterium	TGAGGAATATTGGTCAATGGACGCAAGTCTGAACCAGCCATGCCGCGTGCAGGAAGACGGCCCTATGGGTTGTAAACTGCTTTTATATAGGAAGAAACCTCTCTACGTGTAGAGACTTGACGGTACTATATGAATAAGCACCGGCTAACTCCGTGCCAGCAGCCGCGGTAATACGGAGGGTGCAAGCGTTATCCGGATTTATTGGGTTTAAAGGGTCCGTAGGCGGATCTTTAAGTCAGTGGTGAAAGCCTACAGCTCAACTGTAGAACTGCCATTGATACTGGAGATCTTGAGTGTATTTGAAGTGGGCGGAATGTGTCATGTAGCGGTGAAATGCATAGATATGACACAGAACACCGATTGCGAAGGCAGCTCACTAAACTACAACTGACGCTGAGG…
5e12ccc9e69f22e30cbbedd2b9010afe	D_0__Bacteria;D_1__Chloroflexi;D_2__KD4-96;D_3__uncultured bacterium;D_4__uncultured bacterium;D_5__uncultured bacterium;D_6__uncultured bacterium	TCGGGAATTTTGCTCAATGGGGGAAACCCTGAAGCAGCAACGCCGCGTGAGGGATGACGGCCTTCGGGTTGTAAACCTCTTTTGCCGGGGACGATAATGACGGTACCCGGAGAATAAGCCACGGCTAACTACGTGCCAGCAGCCGCGGTAATACGTAGGTGGCAAGCGTTGTCCGGATTTACTGGGCGTAAAGAGCGCGCAGGCGGCCAGGTCAGTCGAATGTGAAAGCCCCCGGCTCAACTGGGGAAGGTCGTTCGATACTGCTTGGCTCGAAGGTAGGAGAGGGAAGTGGAATTCCACATGTAGCGGTGAAATGCGTAGATATGTGGAGGAACACCAGTGGCGAAGGCGACTTCCTGGACCAAAACTGACGCTGAGGTGCGAAAGCGTGGGTAGCAA…
c15553d8834cecbccdedbd959a3623d3	D_0__Bacteria;D_1__Acidobacteria;D_2__Thermoanaerobaculia;D_3__Thermoanaerobaculales;D_4__Thermoanaerobaculaceae;D_5__Subgroup 10	TGAGGAATATTGGACAATGGGCGAAAGCCTGATCCAGCAACGCCGCGTGGAGGATGAAGGTCTTCGGATTGTAAACTCCTGTCAGGTGGGACGAAAACACTGACGGTACCACCAGAGGAAGCCCCGGCTAACTCCGTGCCAGCAGCCGCGGTAATACGGAGGGGGCGAGCGTTATTCGGAATTATTGGGCGTAAAGGGCGCGTAGGCGGCCTGACAAGTCAGGGGTGAAATCCCTCGGCTCAACCGAGGAACTGCCTCTGAAACTATCAAGCTTGAGGCCGGGAGAGGGTAGTGGAATTCCCAGTGTAGCGGTGAAATGCGTAGATATATGGAGGAATACCAGTGGCGAAGGCGGCCTCCTGGCTCGATACTGACGCTGAGGTGCGAAAGCGTGGGGAG…
70293f7eb32a9212c4615c2481545c6c	D_0__Archaea;D_1__Nanoarchaeaeota;D_2__Woesearchaeia;D_3__uncultured archaeon;D_4__uncultured archaeon;D_5__uncultured archaeon;D_6__uncultured archaeon	GCGCGTAACCTTTACAATGCACGAAAGTGTGATAAGGGAACCCAAGGTGCTCATGTTATGCATGGGCTTTTTTCAAGAGTAAATATCTTGACGAATAAGTGGTGGGCAAGACTGGTGCCAGCAGCCGCGGTAACACCAGCGCCACGAGTGGCGTTCACGATTATTGGGCCTAAAGCGTCCGTAGCTGGTTCTGTAAGTTTCTTGTGAAAGAGTGGGGCTCAACCCTACTTCGCGCAAGAAAGACTGCAGGGCTAGAGACCGGGAGGAGTAAGAGGTATTTCAGGGGGACTGGTAAAATGGAATAATCCCTGAAGGACCACCAATGGCGAAGGCATCTTACTAGAACGGTTCTGACAGTGAGGGACGAAAGCTAGGGGAGCGAACC
8043c4bd8ace6b1441cabe271cf68a17	D_0__Bacteria;D_1__Proteobacteria;D_2__Alphaproteobacteria;D_3__Thalassobaculales;D_4__uncultured	TGGGGAATATTGGACAATGGGGGCAACCCTGATCCAGCCATGCCGCGTGAGTGAAGAAGGCCCTAGGGTTGTAAAGCTCTTTCAACGGTGACGATGATGACGGTAGCCGTAGAAGAAGCCCCGGCTAACTCCGTGCCAGCAGCCGCGGTAATACGGAGGGGGCAAGCGTTGTTCGGAATTACTGGGCGTAAAGGGCGCGTAGGCGGTCTGTTGCGTCAGGTGTGAAAGCCCCGGGCTCAACCTGGGAGGTGCACTTGATACGGGCAGACTGGAATCCGAGAGAGGATGGTGGAATTCCCAGTGTAGAGGTGAAATTCGTAGATATTGGGAAGAACACCGATGGCGAAGGCAGCCATCTGGCTCGGTATTGACGCTGAGGCGCGAAAGCGTGGGGAGCAA…
727f58b942ebec98e047949b8beb7635	D_0__Bacteria;D_1__Planctomycetes;D_2__Planctomycetacia;D_3__Planctomycetales;D_4__Gimesiaceae;D_5__uncultured;D_6__uncultured Planctomyces sp.	TCGAGAATCTTCGGCAATGGACGCAAGTCTGACCGAGCGACGTCGCGTGCGGGATGAAGGCCTTCGGGTTGTAAACCGCTGTCAGAGGGGAGGAAATCGTAGAAGGCAATCCTTCTTCGTTGACCGAGCCTCAGAGGAAGCACGGGCTAAGTTCGTGCCAGCAGCCGCGGTAATACGAACTGTGCGAACGTTATTCGGAATCACTGGGCTTAAAGGGTGCGTAGGCGGTTACTTAAGTAGGGTGTGAAATGCCCCGGCTCAACCGGGGCACGGCGCTCTAAACTGGGTAGCTTGAGTGAGATAGAGGTGTGCGGAACTTCCGGTGGAGCGGTGAAATGTGTTGATATCGGAGGGAACACCATTGGCGAAAGCGGCACACTGGGTCTCAACTGACGCTGA…
6a73f88350a1d74ca0b6eac5e75aafa6	D_0__Bacteria;D_1__Proteobacteria;D_2__Alphaproteobacteria;D_3__Caulobacterales;D_4__Hyphomonadaceae;D_5__uncultured;D_6__uncultured alpha proteobacterium	TGGGGAATATTGCACAATGGGCGCAAGCCTGATGCAGCCACGCCGCGTGAATGATGAAGGCCTTAGGGTTGTAAAATTCTTTCGCCAAGGATGATAATGACAGTACTTGGTAAAGAAGCCCCGGCTAACTTCGTGCCAGCAGCCGCGGTAATACGAAGGGGGCTAGCGTTGTTCGGAATTACTGGGCGTAAGGCGCACGTAGGCGGATTTTTAAGTCAGATGTGAAATCCCAAGGCTCAACCTTGGAACTGCATTTGAAACTGGGAATCTAGAGATCAGGAGAGGTTAGTGGAATACCGAGTGTAGAGGTGAAATTCGTAGATATTCGGTGGAACACCAGTGGCGAAGGCGACTAACTGGACTGATACTGACGCTGAGGTGCGAAAGTGTGGGGAGCAA…
f5618070130c8339c72d6210077782be	D_0__Bacteria;D_1__Chloroflexi;D_2__Anaerolineae;D_3__Ardenticatenales;D_4__uncultured;D_5__uncultured bacterium;D_6__uncultured bacterium	TGAGGAATATTGCCCAATGGGGGAAACCCTGAGGCAGCAATGCCGCGTGAATGATGAAGGCCTTCGGGTCGTAAAGTTCTTTTCTGTGTGAAGAGAGAGGACGGTAGCACAGGAATAAGTTCCGGCTAACTACGTGCCAGCAGCCGCGGTAAAACGTAGGGAGCAAGCGTTATCCGGATTTACTGGGCGTAAAGCGCATGCAGGCGGCTTGATAAGATAGATGTGAAAGCTCCCGGCTCAACTGGGAGAGGTCATTTATGACTGTCAGGCTTGAGTTAGGTAGAGGAGAGCAGAATTCCCGGTGTAGTGGTGGAATGCGTAGATATCGGGAGGAATACCGGTGGCGAAGGCGACTACCTGGCTGGATACTGACGCTGAGGCGCGAAAGCGTAGGGAGCA…
4f2e2bcce6778c79c60a6e1068d5c06b	D_0__Bacteria;D_1__Bacteroidetes;D_2__Bacteroidia;D_3__Bacteroidales;D_4__Prolixibacteraceae;D_5__Prolixibacter;D_6__uncultured Bacteroidetes bacterium	TGAGGAATATTGGTCAATGGGCGCGAGCCTGAACCAGCCATCCCGCGTGCAGGAAGACGGCCCTATGGGTTGTAAACTGCTTTTGCGCGCCAAGAAACCCGCCCACTAGTGGGCGGCCGACGGTAGCGCGCGAATAAGCACCGGCTAACTCCGTGCCAGCAGCCGCGGTAATACGGAGGGTGCAAGCGTTATCCGGATTCATTGGGTTTAAAGGGTGCGTAGGCGGGCGATTAAGTCAGTGGTGAAATCCTGCGGCTCAACCGTAGAACTGCCATTGAAACTGATCGTCTTGAGTACACGGGAGGTAAGCGGAACGTGCAGTGTAGCGGTGAAATGCTTAGATATTGCACAGAACACCGATTGCGAAGGCAGCTTGCCATAGTGTCACTGACGCTGATG…
60db3a4843eac88c55f81c58a688adff	D_0__Bacteria;D_1__Proteobacteria;D_2__Gammaproteobacteria;D_3__Steroidobacterales;D_4__Woeseiaceae;D_5__Woeseia;D_6__uncultured Pseudomonas sp.	TGGGGAATATTGGACAATGGGCGCAAGCCTGATCCAGCCATCCCGCGTGAGTGATGAAGGCTCTCGGGTCGTAAAGCTCTGTGGAGAGAGACGAAACCTGATCGGTTAATATCCGGTCAACTGACGGTATCTCTTTAGCAAGCACCGGCTAACTCCGTGCCAGCAGCCGCGGTAATACGGAGGGTGCAAACGTTGCTCGGAATCATTGGGCGTAAAGCGCGCGTAGGCGGCTTTGTAAGTCAAATGTGAAAGCCCCGGGCTTAACCTGGGAATTGCATTCGATACTGCAGAGCTAGAGTATGGTAGAGGGAAGTGGAATTCCGGGTGTAGCGGTGAAATGCGTAGATATCCGGAGGAACACCAGTGGCGAAGGCGACTTCCTGGGCCAATACTGACGCT…
622097e1c023733adecc5e042553437e	D_0__Bacteria;D_1__Gemmatimonadetes;D_2__BD2-11 terrestrial group;D_3__uncultured bacterium;D_4__uncultured bacterium;D_5__uncultured bacterium;D_6__uncultured bacterium	TGAGGAATATTGGGCAATGGACGCAAGTCTGACCCAGCCATGCCGCGTGCAGGATGACTGCCCTATGGGTTGTAAACTGCTTTTATTTGGGAAGAAACCCCTGCTCGTGAGCGGGGCTGACGGTACCAAAAGAATAAGCATCGGCTAACTCCGTGCCAGCAGCCGCGGTAAGACGGAGGGCGCAAGCGTTGTTCGGAATTACTGGGCGTAAAGCGCACGCAGGCGGTCTCTTAAGTCCTTTGTGAAAGCCCGGGGCTCAACTCCGGAACTGCAGAGGATACTGGGAGACTGGAGACAGGTAGAGGCTAGCGGAATTCCTGGTGTAGCGGTGGAATGCGTAGATATCAGGAAGAACACCTGTGGCGAAGGCGGCTAGCTGGGCCTGTTCTGACGCTCATG…
d4e29b7ea529f41399cf1dff1bbbcce3	D_0__Archaea;D_1__Nanoarchaeaeota;D_2__Woesearchaeia;D_3__Candidatus Staskawiczbacteria bacterium RIFOXYA2_FULL_32_7;D_4__Candidatus Staskawiczbacteria bacterium RIFOXYA2_FULL_32_7;D_5__Candidatus Staskawiczbacteria bacterium RIFOXYA2_FULL_32_7;D_6__Candidatus Staskawiczbacteria bacterium RIFOXYA2_FULL_32_7	TCGGGAAACTTCTGCAATGCACGAAAGTGTGACAGAGCAAGCCAGAGTGCATTCTCGTATTGGGAACGCTTTTGTGGAACGTAAAAAGTCCCACGAATAAGGACTGGGCAAGACTGGTGCCAGCCGCCGCGGTAATACCAGCGGTCCAAGTCGCAATCAGCTTTATTGGGTCTAAAACATCCGTAGCTTGCTGTGTAAGTCTCTTGTGAAATACCACTTCTCAAGATTGGAAGTGCAAGAGATACTGTACAGCTAGAGACCGGGAGACGTGAAGAGTACAGTTCGGGTAACGGTAAAATGTGTTGATCCTTACTGGACTAACAATAGCGAAGGCACTTCACGAGAACGGATCTGACAGTGAGGGATGAAGGCTAGGGGCGCAAAAC
4ef92c1b14f5deffcfb9fa1c1c87ed8d	D_0__Bacteria;D_1__Epsilonbacteraeota;D_2__Campylobacteria;D_3__Campylobacterales;D_4__Sulfurovaceae;D_5__Sulfurovum	TGGGGAATATTGCACAATGGGGGAAACCCTGATGCAGCAACGCCGCGTGGAGGATGACGCATTTCGGTGTGTAAACTCCTTTTATATGGGAAGATAATGACGGTACCATATGAATAAGCACCGGCTAACTCCGTGCCAGCAGCCGCGGTAATACGGAGGGTGCAAGCGTTACTCGGAATCACTGGGCGTAAAGCGCGCGCAGGCGGCCTATTAAGTTGGATGTGAAAGCCTATGGCTCAACCATAGAACTGCATCCAAAACTATTAGGCTAGAGTCTGGGAGGGGAAGATGGAATTAGTTGTGTAGGGGTAAAATCCGTAGAGATAACTAGGAATACCAAAAGCGAAGGCGATCTTCTGGAACAGTACTGACGCTGAGGCGCGAAAGCGTGGGGAGCAA…
0d8d2c9ae873c6202253b5c0a81c5fe5	D_0__Bacteria;D_1__Proteobacteria;D_2__Gammaproteobacteria;D_3__Gammaproteobacteria Incertae Sedis;D_4__Unknown Family;D_5__uncultured	TGGGGAATATTGCACAATGGGCGCAAGCCTGATGCAGCAATGCCGCGTGTGTGAAGAAGGCCTGCGGGTTGTAAAGCACTTTTATCGGGAAAGAAAACCCTAAGGTTAATACCCTTAGGCTTGACGGTACCTGAAGAATAAGCACCGGCTAACTCAGTGCCAGCAGCCGCGGTAATACTGAGGGTGCAAGCGTTAATCGGAATTACTGGGCGTAAAGCGAGTGTAGGCGGCTTCGTAAGTCGGATGTGAAAGCCCCGGGCTTAACCTGGGAATTGCATTCGATACTGCGCGGCTAGAGTTTGGTAGAGGGAAGTGGAATTCCAGGTGTAGCGGTGAAATGCGTAGAGATCTGGAGGAACATCAGTGGCGAAGGCGGCTTCCTGGATCAAAACTGACGCT…
a640b8b5555ba248e2f5dcf7dd80cb48	D_0__Bacteria;D_1__Proteobacteria;D_2__Gammaproteobacteria;D_3__HOC36;D_4__uncultured sediment bacterium;D_5__uncultured sediment bacterium;D_6__uncultured sediment bacterium	TGGGGAATATTGGACAATGGGCGCAAGCCTGATCCAGCAATGCCGCGTGTGTGAAGAAGGCCTGCGGGTTGTAAAGCACTTTCAGTGGGGAAGAGGGCGTGCACGTAACGAGTGCACGTTGACGTTACCCACAGAAGAAGCACCGGCTAACTCCGTGCCAGCAGCCGCGGTAATACGGAGGGTGCAAGCGTTAATCGGAATTACTGGGCGTAAAGCGCGCGTAGGCGGTTAAGTGAGTCAGATGTGAAAGCCCCGGGCTCAACCTGGGAATGGCATTTGATACTGCTTAGCTAGAGTCTGACAGAGGGTGGCGGAATTCCGGGTGTAGCGGTGAAATGCGTAGATATCCGGAGGAACACCGGTGGCGAAGGCGGCCACCTGGGTCAAGACTGACGCTGA…
31fd8034aa2eab7c1f03ea434545642e	D_0__Bacteria;D_1__Cyanobacteria;D_2__Oxyphotobacteria;D_3__Chloroplast	TAAGGAATATTGGACAGTGGGCGAAAGCCTGATCCAGCCACGCCGCGTGCAGGATGACACCCCTATGGGGCGTAAACTGCTTTTATGTGAGAAGAACCCCCTGGTTGCCAGGGTTGACGGTATCACATGAATAAGCACCGGCTAACTCCGTGCCAGCAGCCGCGGTAAGACGGAGGATGCAAGTGTTATCCGGAATCACTGGGCGTAAAGCGTCTGTAGGTGGTTTAATAAGTCAACTGTTAAATCTTGAGGCCCAACCTCAAAATCGCAGTCGAAACTATTAGACTAGAGTATAGTAGGGGTAAAGGGAATTTCCAGTGGAGCGGTGAAATGCGTAGAGATTGGAAAGAACACCGATGGCGAAGGCACTTTACTGGGCTATTACTAACACTCAGAGAC…
f83f6d6f93afac38689e1fc1722dd652	D_0__Bacteria;D_1__Patescibacteria;D_2__ABY1;D_3__Candidatus Kuenenbacteria;D_4__uncultured bacterium;D_5__uncultured bacterium;D_6__uncultured bacterium	TCAAGAATCTTCCGCAATGCGCGAAAGCGTGACGGAGCGACACCGCGTGGTTGAAGACGCCCTTCGGGGTGTAAAAACCTTTTATCAGGGAAGAACGATGACAGTACCTGAAGAATAAGGGGCTGCTAAACTCGTGCCAGCAGCAGCGGTAATACGAGTGCCCCAAGCGTTATCCGGATTTATTGGGCGTAAAGCGTGTCCAGGCGGTTTGGTAAGTAACTTGTCAAATCTCAAGGCTCAACTTTGAGACTGCGAGTTAAACTACTAAACTAGAGAACGGGAGAGGCAAACGGAATGGCCGGTGTAGCAGTAAAATGCGTTAATATCGGTTGGAACACCAAAGGCGAAGGCAGTTTGCTAGAACGGTTCTGACGCTCACACACGAAAGCGTGGGTAGCG…
4551eecfd04e2b18d12b93226aab6322	D_0__Bacteria;D_1__Latescibacteria;D_2__uncultured Latescibacteria bacterium;D_3__uncultured Latescibacteria bacterium;D_4__uncultured Latescibacteria bacterium;D_5__uncultured Latescibacteria bacterium;D_6__uncultured Latescibacteria bacterium	TCGAGAGGCTTCGGCAATGGGGGAAACCCTGACCGAGCGACGCCGCGTGCGGGATGAAGGCCCTCGGGTTGTAAACCGCTGTCAGAAGGGAAGAATCCTTCCGGGTTAATACCCCGGAAGCTGACGGTACCTTCAGAGGAAGCTCCGGCTAACTCCGTGCCAGCAGCCGCGGTAATACGGAGGGAGCGAACGTTGTTCGGATTTACTGGGCGTAAAGGGCGTGTAGGCGGCTTTGCAAGTCGGAGGTGAAATGTCCCGGCTCAACCGGGGACCTGCCTTTGAAACTGCAGAGCTTGAGGTCGTGAGAGGAGACTGGAATTCCTAGTGTAGCGGTGAAATGCATAGATATTAGGAAGAACACCAGTGGCGAAGGCGAGTCTCTGGCACGATTCTGACGCT…
e93ff2ac7c3cdaec44a73d0c8576982e	D_0__Bacteria;D_1__Patescibacteria;D_2__ABY1;D_3__Candidatus Kerfeldbacteria;D_4__uncultured bacterium;D_5__uncultured bacterium;D_6__uncultured bacterium	TCGAGAATCTTCCCCAATGGCCGCAAGGCTGAGGGAGCGACGCCGCGTGTAGGAAGACGCCCTTCGGGGTGTAAACTACTTTTCTCAGGGAAAAACTATGATGGTACCTGAGGAATAAGGGGCTGCTAACTTCGTGCCAGCAGCAGCGGCGATACGAAGGCCCCGAGCGTTATCCGGATTTATTGGGCGTAAGGAGCTAAAAGGCTGCTTGAAAAGTTCTTGGTTAAATCTCACGGCTCAACCGTGAGGCCGCCAGGAAAACTTTCAAGCTTGAGATCGGAAGAGGTACGTGGAACTGCCGGTGTAGTGGTAAAATGCGTTAATATCGGCAGGAACACCAAATGCGAAGGCAGCGTACTAGGACGATTCTGACGCTACATAGCGAAAGCGTGGGTCGCG…
1ca234ce6039135392598bfb0ef17116	D_0__Bacteria;D_1__Spirochaetes;D_2__V2072-189E03	TTAAGAATCTTGCGCAATGGACGAAAGTCTGACGCAGCGACGCCGCGTGAGCGATGAAGGCCCATAGGGTTGTAAAGCTCAGTAAACAGGGAAGATAGTGACGGTACCTGTTGAAAGCACCGGCTAAATACGTGCCAGCAGCCGCGGTAATACGTATGGTGCGAGCGTTGTTCGGAATTATTGGGCGTAAAGGGAGCGCAGGCGGGGCATTAAGTCAGATGTGAAAGTCCACGGCTCAACCGTGGGATTGCATTTGAAACTGATGCTCTAGAGTTTGGAAGAGGAAGACGGAATTCCTGGTGTAGCGGTGAAATGCGTAGATATCAGGAAGAACACCGGTGGCGAAGGCGGTCTTCTGGTCTGGAACTGACGCTGAGGCTCGAAAGCGTGGGGAGCGAA…
3dd0957463cab6fd73064cda419d4f97	D_0__Bacteria;D_1__Bacteroidetes;D_2__Bacteroidia;D_3__Chitinophagales;D_4__Saprospiraceae;D_5__uncultured;D_6__uncultured Bacteroidetes bacterium	TAAGGAATATTGGACAATGGGCGCAAGCCTGATCCAGCCATCCCGCGTGCAGGAAGACGGTTCTATGAATTGTAAACTGCTTTTGTTAGGGAAGAACTCCCCGGACTTGTCCGGGGCTGACGGTACCTAAAGAATAAGCACCGGCTAACTCCGTGCCAGCAGCCGCGGTAATACGGAGGGTGCAAGCGTTATCCGGAATTACTGGGTTTAAAGGGTGCGTAGGCGGCGTTGTAAGTCAGAAGTGAAAGCTTTCAGCTCAACTGGAAAATTGCTTTTGATACTGCAGTGCTTGAATCAGGTTGAGGTTAGCGGAATGTGACATGTAGCGGTGAAATGCATAGATATGTCATAGAACACCAATTGCGAAGGCAGCTAACTAGGCCTGTATTGACGCTGAGG…
e2260b5db73477ac7037ac60d72502ad	D_0__Bacteria;D_1__Chloroflexi;D_2__Anaerolineae;D_3__Anaerolineales;D_4__Anaerolineaceae;D_5__uncultured;D_6__uncultured Chloroflexi bacterium	TAGGGAATATTGCACAATGGGCGAAAGCCTGATGCAGCAACGTCGCGTGTGCGATGAAGGCCTTCGGGTTGTAAAGCACTTTTCGGGGAGAAGAGGAAGGACGGTATCCCCGGAATAAGGTTCGGCTAACTACGTGCCAGCAGCCGCGGTAAAACGTAGGAACCGAGCGTTATCCGAATTTACTGGGCGTAAAGCGCGTGTAGGCGGTTCGGTAAGTTGGATGTGAAAGCTCCTGGCTCAACTAGGAGAGGACGTTCAATACTGTCGGACTAGAGGGCAGCAGAGGGAGGTGGAATTCCCGGTGTAGTGGTGAAATGCGTAGATATCGGGAGGAACACCAGAGGCGAAGGCGGCCTCCTGGGCTGCACCTGACGCTCAGACGCGAAAGCTAGGGGAGCA…
2da7de2c9883af6d1f862f0e190d1325	D_0__Bacteria;D_1__Bacteroidetes;D_2__Ignavibacteria;D_3__Ignavibacteriales;D_4__Melioribacteraceae;D_5__IheB3-7;D_6__uncultured Chlorobi bacterium	TGAGGAATATTGGGCAATGGACGAAAGTCCGACCCAGCAACGCCGCGTGGAGGATGAATGTCGTAAGATTGTAAACTCCTTTTGGAGGGGACGAAAAAACAGGTTTGAAGCCTGAATTGACGGTACCCTCAGAATAAGCCCCGGCTAACTACGTGCCAGCAGCCGCGGTAATACGTAGGGGGCAAGCGTTGTCCGGATTTACTGGGTGTAAAGGGTGCGCAGGCGGACTTGTAAGTCAAGGGTGGAATCCTACAGCCCAACTGTAGAACTGCCTTTGAAACTACAAGTCTTGAGTTCGGAAGAGAGAGGCGGAATTCCAGGTGTAGTGGTGAAATACGTAGATATCTGGAAGAACACCAGAGGCGAAGGCGGTCTCTTGGTCCGTAACTGACGCTGAGG…
887a165fd1eda3b6bc005059d29f460a	D_0__Bacteria;D_1__Verrucomicrobia;D_2__Verrucomicrobiae;D_3__Opitutales;D_4__Puniceicoccaceae;D_5__Lentimonas;D_6__uncultured marine bacterium	TTTCGAATCATTCACAATGGGGGCAACCCTGATGGTGCAACGCCGCGTGAGGGATGAAGGCCTTCGGGTCGTAAACCTCTGTCACCGGGGAGCAACAAGCAGGTTCATAGCCTGCCCTGAGTTAACCCGGAGAGGAAGCAGTGGCTAACTCCGTGCCAGCAGCCGCGGTAATACGGAGACTGCAAGCGTTACTCGGATTCACTGGGCGTAAAGGGTGCGTAGGCGGATAGATGTGTCAGGTGTGAAATCTCGGGGCTCAACCTCGAAACTGCGCCTGAAACTGTCTATCTAGAGTATTGGAGGGGTAAGCGGAATTTCTGGTGTAGCGGTGAAATGCGTAGATATCAGAAGGAACACCAATGGCGAAGGCAGCTTACTGGACAAATACTGACGCTGAGG…
9691a2c62d673f4d82340c169b6ac141	D_0__Bacteria;D_1__Actinobacteria;D_2__Acidimicrobiia;D_3__Actinomarinales;D_4__uncultured	TAGGGAATTTTGCGCAATGGACGAAAGTCTGACGCAGCAACGCCGCGTGAGTGATGACGGTCCTCGGACTGTAAAGCTCTGTCAGGAGGGAAGAAACTGCTTGGTAACCCCAAGCACTGACGGTACCTCCAGAAGAAGGCCCGGCCAACTACGTGCCAGCAGCCGCGGTAATACGTAGGGGCCAAACGTTGTCCGGATTTATTGGGCGTAAAGGGCTCGTAGGCGGTTCAACAAGTCGGTCGTGAAAGCCCGGGGCTCAACCCCGGGACGCCGGTCGAAACTGTTGTGACTAGGGTCCGGTAGAGGTGAGTGGAATTCTCGGTGTAGCGGTGGAATGCGCAGATATCGAGAGGAACACCAGTAGCGAAGGCGGCTCACTGGGCCGGTACCGACGCTGAG…
80da02a879f70a52275fbc8fe7327d4c	D_0__Bacteria;D_1__Bacteroidetes;D_2__Bacteroidia;D_3__Flavobacteriales;D_4__Flavobacteriaceae;D_5__Actibacter;D_6__uncultured Bacteroidetes bacterium	TGAGGAATATTGGTCAATGGAGGCAACTCTGAACCAGCCATGCCGCGTGCAGGAAGACTGCCCTATGGGTTGTAAACTGCTTTTATACAGGAAGAAACTTATCCACGTGTGGATAACTGACGGTACTGTACGAATAAGGACCGGCTAACTCCGTGCCAGCAGCCGCGGTAATACGGAGGGTCCAAGCGTTATCCGGAATCATTGGGTTTAAAGGGTCCGTAGGCGGGCGATTAAGTCAGAGGTGAAATCCCACAGCTCAACTGTGGAACTGCCTTTGATACTGGTTGTCTTGAGTTACAGTGAAGTAGATAGAATATGTAGTGTAGCGGTGAAATGCATAGATATTGGAAGGAACACCAGTGGCGAAGGCGACTTCCTGGGCCAATACTGACGCTGAGG…
b1c358eec8a161b1b596a5afeedca40b	D_0__Bacteria;D_1__Proteobacteria;D_2__Deltaproteobacteria;D_3__Bdellovibrionales;D_4__Bdellovibrionaceae;D_5__OM27 clade;D_6__uncultured bacterium	TGGGGAATATTGCGCAATGGGCGAAAGCCTGACGCAGCCACGCCGCGTGAGTGATGAAGGCCCGAGGGTCGTAAAGCTCTGTCGGGAGGGAAGAAGTTCTGACGGTACCTCCCAAGAAAGCACCGGCTAACTCCGTGCCAGCAGCCGCGGTAATACGGAGGGTGCAAGCGTTGCTCGGAATCACTGGGCGTAAAGCGTACGCAGGCGGCTTGTTAAGTCGGGTGTGAAAGCCCGGGGCTCAACCCCGGAACTGCATTCGAAACTGGCAAGCTTGAGTACGGGAGAGGGAAGCGGAATTCCTGGTGTAGAGGTGAAATTCGTAGATATCAGGAGGAACACCCGTGGCGAAAGCGGCTTCCTGGCCCGATACTGACGCTCATGTACGAAAGCGTGGGGAGC…
304424df9111670c0db6343e3865ab6f	D_0__Bacteria;D_1__Bacteroidetes;D_2__Bacteroidia;D_3__Bacteroidetes VC2.1 Bac22;D_4__uncultured Bacteroidetes bacterium;D_5__uncultured Bacteroidetes bacterium;D_6__uncultured Bacteroidetes bacterium	TAAGGAATATTGGTCAATGGAGGAAACTCTGAACCAGCCATGCCGCGTGCAGGAAGACAGCCTTATGGGTTGTAAACTGCTTTTATAAAGGGATAACCCCCCCAACGAGTTGGGGGCTGAAGGTACTTTATGAATAAGCACCGGCTAACTCCGTGCCAGCAGCCGCGGTAATACGGAGGGTGCAAGCGTTATCCGGATTTATTGGGTTTAAAGGGTGCGCAGGCGGACCTGCCAGTCAGTGGTGAAATCCCGAGGCTCAACTTCGGAACTGCCATTGATACTACAGGTCTTGAATACGGTTGAGGTAGGCGGAATGTAGCATGTAGCGGTGAAATGCATAGATATGCTACAGAACACCGATCGCGAAGGCAGCTTACCAAACCGATATTGACGCTCAGG…
8948a745b7c724b9e9f37d6e4565794b	D_0__Bacteria;D_1__Bacteroidetes;D_2__Bacteroidia;D_3__Flavobacteriales;D_4__NS9 marine group;D_5__uncultured Bacteroidetes/Chlorobi group bacterium;D_6__uncultured Bacteroidetes/Chlorobi group bacterium	TGAGGAATATTGCACAATGGAGGAAACTCTGATGCAGCCATGCCGCGTGCAGGATGAATGCCCTATGGGTTGTAAACTGCTTTTATACGAGAAGAAACCTCGGTACGTGTACCGACTTGACGGTATTGTATGAATAAGCACCGGCTAACTCCGTGCCAGCAGCCGCGGTAATACGGAGGGTGCAAGCGTTATCCGGATTTATTAGGTTTAAAGGGTCCGCAGGCGGAATATTAAGTCAGTGGTGAAAGCCTACAGCTCAACTGTAGAACTGCCATTGAAACTGTTATTCTTGAGTATGGATGAAGTGGGCGGAATATGTCATGTAGCGGTGAAATGCATAGATATGACATGGAACACCAATTGCGAAGGCAGCTCACTAAACCATTACTGACGCTCATG…
1c2a524e9361b4de2d05d29d7948f48e	D_0__Bacteria;D_1__Bacteroidetes;D_2__Bacteroidia;D_3__Chitinophagales;D_4__Saprospiraceae	TAAGGAATATTGGACAATGGGCGCAAGCCTGATCCAGCCATCCCGCGTGCAGGATGAAGGCCCTACGGGTTGTAAACTGCTTTTACCAGGGAAGAAATCCTATTATTTATAATGGGCTGACGGTACCTGAGGAATAAGCACCGGCTAACTCCGTGCCAGCAGCCGCGGTAATACGGAGGGTGCAAGCGTTATCCGGAATCACTGGGTTTAAAGGGTGCGTAGGCGGCGTTGTTAGTCAGGAGTGAAATCCCACGGCTCAACTGTGGAATTGCTTTTGATACTGCAATGCTTGAATCGGGTTAAGGTAGGCGGAATGTGGCATGTAGCGGTGAAATGCATAGATATGCCATAGAACACCAATTGCGAAGGCAGCTTACTAGACCTGTATTGACGCTGAGG…
af371a6ee61d3ea25a343edf77f3557c	D_0__Bacteria;D_1__Bacteroidetes;D_2__Bacteroidia;D_3__Bacteroidales;D_4__Bacteroidetes BD2-2	TGAGGAATATTGGTCAATGGGCGAAAGCCTGAACCAGCCATGCCGCGTGAAGGATGACGGCGCTACGCGTTGTAAACTTCTTTTGTACGAGAAGAAACCACTCTACGTGTAGAGTGTTGACGGTATCGTACGAATAAGCATCGGCTAACTCCGTGCCAGCAGCCGCGGTAATACGGAGGATGCAAGCGTTATCCGGATTTATTGGGTTTAAAGGGTGCGTAGGCGGAAAATTAAGTCAGTGGTGAAATCCTGCAGCTCAACTGTAGAACTGTCATTGATACTGATTTTCTTGAATACAGTTGAGGTAGGCGGAATATGTAATGTAGCGGTGAAATGCTTAGATATTACATAGAACACCGATTGCGAAGGCAGCTTACTAAACTGTGATTGACGCTGAGG…
09eab42db71644c0c9aa82b49b9147ff	D_0__Bacteria;D_1__Proteobacteria;D_2__Deltaproteobacteria;D_3__Myxococcales;D_4__bacteriap25	TGGGGAATATTGGGCAATGGGCGAAAGCCTGACCCAGCGACGCCGTGTGAGTGATGAAGGTTTTCGGATCGTAAAGCTCTGTCAGAGGGAACGATGGCAGGGAGCATCAGATCCTTCCTGTTGACGGTACCTTCAAAGGAAGCACCGGCTAACTCCGTGCCAGCAGCCGCGGTAATACGGAGGGTGCAAGCGTTGTTCGAAATCATTGGGCGTAAAGCGCACGTAGGCGGCCGACTATGTCGTCTGTGAAATCCCTCAGCTCAACTGAGGAAGGTCAGGCGAAACTGGTCGGCTAGAGTACGATAGAGGAGAGCGGAATTCCGAGTGTAGAGGTGAAATGCGTAGATATCATGAGGAACACCAGAGGCGAAGGCGGCTCACTGGACGATTACTGACGCT…
94c067f9c50f817a9a491f61bd044837	D_0__Bacteria;D_1__Bacteroidetes;D_2__Bacteroidia;D_3__Flavobacteriales;D_4__Crocinitomicaceae;D_5__Crocinitomix;D_6__uncultured bacterium	TGAGGAATATTGGTCAATGGAGGCAACTCTGAACCAGCCATGCCGCGTGAAGGAAGACGGCCCTACGGGTTGTAAACTTCTTTTATACACCAAGAAACGCAGATACGTGTATTTGTTTGACGGTAGTGTATGAATAAGCACCGGCTAACTCCGTGCCAGCAGCCGCGGTAATACGGAGGGTGCGAGCGTTATCCGGAATTATTGGGTTTAAAGGGTACGCAGGCGGCCTAATAAGTCAGTGGTGAAATCCCGTCGCTCAACGACGGAACTGCCATTGATACTGTTAGGCTTGAATATAGTTGAAGTGGGCGGAATGTGTAGTGTAGCGGTGAAATGCTTAGATATTACACAGAACACCGATAGCGAAGGCAGCTCACTAATCTATTATTGACGCTCATG…
92f5191628603a4a2d4bba73aa6338d6	D_0__Bacteria;D_1__Planctomycetes;D_2__Planctomycetacia;D_3__Pirellulales;D_4__Pirellulaceae;D_5__uncultured	TCGAGAATCTTCCGCAATGGGCGAAAGCCTGACGGAGCGACGCCGCGTGTGGGATGAAGGCCTTCGGGTTGTAAACCGCTGTCAGTAGGGAGGAAATCTATGGGGGTTATCCCCCATAGTTGACCTATCTTCAGAGGAAGGACGGGCTAAGTTCGTGCCAGCAGCCGCGGTAAGACGAACCGTCCAAACGTTATTCGGAATCACTGGGCTTAAAGGGTGCGTAGGCGGCCTGGCAAGTTGGGTGTGAAATCCCTCGGCTCAACCGAGGAATTGCGCTCAAAACTGCTTGGCTAGAGGGAGATAGAGGTGAGCGGAACTTATGGTGGAGCGGTGAAATGCGTTGATATCATAAGGAACACCTGTGGCGAAAGCGGCTCACTGGATCTCTTCTGACGCTGA…
bc9dc176343cbe689e3eb57ae49f3234	D_0__Bacteria;D_1__Nitrospirae;D_2__Nitrospira;D_3__Nitrospirales;D_4__Nitrospiraceae;D_5__Nitrospira	TGAGGAATATTGCGCAATGGGCGAAAGCCTGACGCAGCGACGCCGCGTGGGGGATGAAGGTTTTCGGATTGTAAACCCCTTTTGTGAGGAAAGAGAAAGTGGGTAACCACTTAGACGGTACCTCAAGAAAAAGCCACGGCTAACTTCGTGCCAGCAGCCGCGGTAATACGAAGGTGGCGAGCGTTGTTCGGATTTACTGGGCGTAAAGAGCACGTAGGCGGTTGGGTAAGCCTCTTGGGAAAGCTCCCGGCTTAACCGGGAAAGGTCGAGGGGAACTACTCAGCTAGAGGACGGGAGAGGAGCGCGGAATTCCCGGTGTAGCGGTGAAATGCGTAGATATCGGGAAGAAGGCCGGTGGCGAAGGCGGCGCTCTGGAACGTACCTGACGCTGAGGTGCGA…
906db027998ac40b3301a9c4d9d7b1e6	D_0__Archaea	GCGCGAAACCTTTACAATGCACGAAAGTGTGATAAGGGTACTCAACGTGACTAGGGTATAAGCCTTAGTCTGTGTTTGAACGTAAAGCGTTCAGATAGAAAGGAGAGGGCAAGGCCAGTGCCAGCCGCCGCGGTAACACTGGCTCTTCAAGTGAACTGGATGATTATTGAGGTTAAAGCGTCCGTAGCCGGATTGGTTAGTCTTTGGTGAAATCCACGCGCTTAACGCGTGGGAGTGCTAAAGATACTGCCAATCTTGGGAGTAGGAGAAGTGGGCGGTACGTTATTGTTAGGGGTGAAATCCGCAGACCAATAACGGACCACCAGTGGCGAAGGCGGCCCACTAGAATATGTCCGACGGTGAGGGACGAAAGCCAGGGGAGCAAAAC
93a37d2451de850c806aa1b071e8fdeb	D_0__Bacteria;D_1__Proteobacteria;D_2__Deltaproteobacteria;D_3__Myxococcales;D_4__Haliangiaceae;D_5__Haliangium	TGGGGAATATTGGACAATGGGGGCAACCCTGATCCAGCCATCCCGCGTGAGTGATGAGGGCCCTCGGGTCGTAAAGCTCTGTGGAGAGGGACGAACGAACGTAAGTTAATAGCTTGCGGAATGACGGTACCTCTTTAGCAAGCACCGGCTAACTCCGTGCCAGCAGCCGCGGTAATACGGAGGGTGCAAACGTTGCTCGGAATTATTGGGCGTAAAGCGCGCGTAGGCGGTCGCGTAAGTCGGATGTGAAAGCCCTCGGCTTAACCGAGGAAGTGCATTCGAAACTGCGTGACTTGAGTATGGGAGAGGGTTGTGGAATTCCCGGTGTAGAGGTGAAATTCGTAGATATCGGGAGGAACACCAGTGGCGAAGGCGACAACCTGGACCAATACTGACGCT…
40b32d262090016fdaed4336add2fdd5	D_0__Bacteria;D_1__Planctomycetes;D_2__Planctomycetacia;D_3__Pirellulales;D_4__Pirellulaceae;D_5__Rubripirellula;D_6__uncultured bacterium	TCGAGAATCTTCGGCAATGGACGAAAGTCTGACCGAGCGACGCCGCGTGCGGGACGAAGGCCCTCGGGTTGTAAACCGCTGTCAGTTAGGAGGAAATCCATGGTGGTTATCCATCATGGTTGACCGATTTTCAGAGGAAGGACGGGCTAAGTTCGTGCCAGCAGCCGCGGTAAGACGAACCGTCCAAACGTTATTCGGTATCACTGGGCTTAAAGCGTGCGTAGGCGGCTTGGTAGGTGAGATGTGAAAGCCCACGGCTCAACCGTGGAATAGCGTCTCAAACCCTCAAGCTCGAGGAAGATAGGGGTGATGGGAACTTATGGTGGAGCGGTGAAATGCGTTGATATCATAGGGAACACCGGTGGCGAAAGCGCATCACTGGATCTTTTCTGACGCTGA…
5a0921afd61dcdd0e9db756a847a61c1	D_0__Bacteria;D_1__Planctomycetes;D_2__Planctomycetacia;D_3__Pirellulales;D_4__Pirellulaceae;D_5__Rhodopirellula	TCGAGAATCTTCCGCAATGGACGAAAGTCTGACGGAGCGACGCCGCGTGCGGGATGAAGGCCCTCGGGTTGTAAACCGCTGTCAGTTGGGAGGAAGTGCATAAGGGTTCTCTCTTATGTTTGACCGATCTTCAGAGGAAGTCCGGGCTAAGTTCGTGCCAGCAGCCGCGGTAAGACGAACCGGACGAACGTTATTCGGAATCACTGGGCTTAAAGAGTGCGTAGGCGGCTTGGTAGGTTGGGTGTGAAATCCCACAGCTCAACTGTGGAACTGCGCTCAATACCACCAGGCTTGAGGAAGGCAGAGGTGAGCGGAACTGATGGTGGAGCGGTGAAATGCGTTGATATCATCAGGAACACCGGTGGCGAAGGCGGCTCACTGGGCCTTTTCTGACGCTGA…
2f9e8733ab8b087d7809d54e980be26d	D_0__Bacteria;D_1__Proteobacteria;D_2__Gammaproteobacteria;D_3__Gammaproteobacteria Incertae Sedis;D_4__Unknown Family;D_5__uncultured;D_6__uncultured gamma proteobacterium	TAGGGAATATTGCACAATGGGCGAAAGCCTGATGCAGCAATGCCGCGTGTGTGAAGAAGGCCTGCGGGTTGTAAAGCACTTTTATCGGGAAAGAAAAAATCTAGATTAATACTCTAGATCTTGACGGTACCCGAAGAATAAGCACCGGCTAACTCCGTGCCAGCAGCCGCGGTAATACGGAGGGTGCAAGCGTTAATCGGAATTACTGGGCGTAAAGCGAGTGTAGGCGGCAGCATATGTCGGATGTGAAAGCCCTGGGCTTAACCTGGGAACTGCATTCGAAACTGTGCAGCTTGAATCAGACAGAGGGATGTGGAATTCCGGGTGTAGCGGTGAAATGCGTAGATATCCGGAGGAACACCAGTGGCGAAGGCGGCATCCTGGGTCTAGATTGACGCT…
6e2fef2d038e23a14d6b6f9b056b2657	D_0__Bacteria;D_1__Proteobacteria;D_2__Gammaproteobacteria	TGAGGAATATTGGTCAATGGGCGCAAGCCTGAACCAGCCATGCCGCGTGAAGGATGACAGCGCTATGCGTTGTAAACTTCTTTTGTACAGGAAGAAACGCTTCTACGTGTAGAAGTCTGACGGTACTGTACGAATAAGCATCGGCTAACTCCGTGCCAGCAGCCGCGGTAATACGGAGGGTGCAAGCGTTAATCGGAATTACTGGGCGTAAAGCGCGCGTAGGCGGTTTAGTCAGTCAGATGTGAAAGCCCTGGGCTCAACCTGGGAACTGCATTTGATACTGCTGAACTGGAGTATGGTAGAGGGAAGTGGAATTCCGGGTGTAGCGGTGAAATGCGTAGATATCCGGAGGAACACCAGTGGCGAAGGCGACTTCCTGGACCAATACTGACGCTGAGG…
810ee5e95c83238d9a5b8b85fef51a1d	D_0__Bacteria;D_1__Proteobacteria;D_2__Deltaproteobacteria;D_3__Desulfobacterales;D_4__Desulfobulbaceae;D_5__uncultured;D_6__bacterium WH6-5	TCGAGGATCTTCCGCAATGGTCGAAAGACTGACGGAGCGACGCCGCGTGGAGGATGAAGGCCTTCGGGTTGTAAACTCCTGTCACGGGTTAGGAATGGCGATGCGTTAATAGCGTATCGGTTGACAAAGGCCCGAGAGGAAGCCACGGCTAACTCTGTGCCAGCAGCCGCGGTAATACGGAGGGTGCAAGCGTTGTTCGGAATTACTGGGCGTAAAGCGCGCGTAGGCGGCTATATAAGTCAGATGTGAAAGCCCGCGGCTCAACCGTGGAAGTGCATTTGAAACTGTATAGCTTGAGTACTGGAGGGGGTAGTGGAATTCCCGGTGTAGAGGTGAAATTCGTAGATATCGGGAGGAATACCGGTGGCGAAGGCGACTACCTGGCCAGATACTGACGCT…
10d3cec2b028c7f443068afe847b9679	D_0__Bacteria	TGGGGAATTTTCCGCAATGGGCGAAAGCCTGACGGAGCAATACCGCGTGAGGGATGACGGCCTATGGGTTGTAAACCTCTTTTTTCAGGGAGGAATCAAATGACGTGTACCTGAAGAATGAGCATCGGCTAACTCCGTGCCAGCAGCCGCGGTAAGACGGAGGATGCAAGTGTTATCCGGAATCACTGGGCGTAAAGCGCGCGTAGGCGGCTTTGTAAGTCGGATGTGAAAGCCCTGGGCTTAACCTGGGAATTGCATTCGAAACTACAGAACTAGAGTATGGTAGAGGGAAGTGGAATTTCCGGTGTAGCGGTGAAATGCGTAGATATCGGAAGGAACACCAGTGGCGAAGGCGACTTCCTGGGCCAATACTGACGCTGAGGTGCGAAAGCGTGGGGA…
930e64e44c9127c30fe9458c9a164569	D_0__Bacteria	TGAGGAATATTGCGCAATGGAGGAAACTCTGACGCAGCAATGCCGCGTGAGTGAAGATGGCCTATGGGTTGTAAAGCTCTGTCAGGAGGGAAGAACGGCCAGATTTGTAGTCTGGCGTGACGGTACCTCCAGAGGAAGCTCCGGCTAACTCCGTGCCAGCAGCCGCGGTAATACGGGGGGAGCAAGCGTTGTCCGGAATCATTGGGCGTAAAGGGTGCGTAGGCGGGCTATTAAGTCTGATGTGAAAGCCCACGGCTTAACCGTGGAGAGTCATTGGATACTGATAGTCTTGAATCACAGAGGGGTCAGTGGAATTCCAGGTGTAGCGGTGAAATGCGTAGATATCTGGAGGAACATCGGTGGCGAAGGCGACTGGCTGGCTGTTGATTGACGCTGAGG…
bd2dbc1e7f18bbfaaf7bcc0a03892f94	D_0__Bacteria;D_1__Cyanobacteria;D_2__Melainabacteria;D_3__Vampirovibrionales;D_4__uncultured bacterium;D_5__uncultured bacterium;D_6__uncultured bacterium	TAGGGAATCTTGCGCAATGGGCGAAAGCCTGACGCAGCAATTCCGCGTGGAGGACGAAGCATTTCGGTGTGTAAACTCCTTTCGGCAGGGAAGATAATGACGGTACCTGCAGAAGAAGCACCGGCTAACTACGTGCCAGCAGCCGCGGTAAGACGTAGGGTGCAAGCGTTGTCCGGATTTATTGGGCGTAAAGCGTTCGTAGGCGGCTTGTCAAGTCTGATGTTAAAGCCCGGAGCTCAACTCCGGCATGGCATTGGAAACTGGCTCGCTAGAGTATGGTAGAGGCAAGGGGAATTCCCGGTGTAGCGGTGAAATGCGTAGATATCGGGAGGAACACCAGTGGCGAAAGCGCCTTGCTGGACCATTACTGACGCTGAGGAACGAAAGCTAGGGTAGCGA…
a8f3109cf83fc68c43a9313d8215823f	D_0__Bacteria;D_1__Patescibacteria;D_2__Parcubacteria;D_3__Candidatus Moranbacteria;D_4__uncultured bacterium;D_5__uncultured bacterium;D_6__uncultured bacterium	TCCAGAACCTTCCACAATGGGCGAAAGCCTGATGGAGCGACGCCGCGTGCGGGATGACAGCCTTAGGGTTGTAAACCGCTTTTATAAGTGAAGAACTTTAATGACATTAACTTATGAATAAGAGGTTGCTAACTACGTGCCAGCAGCAGCGGTAATACGTAGACCTCAAGCGTTATCCGGATTTATTGGGCGTAAAGGGTGTGTAGGCGGTTTAAATAGTCAAATGTTAAATCACAGGGCTCAACTCTGTGACCGCATTTGAAACGTTTAAACTAGAAACAGGTAGAGGTTAACGGAACTCATGGTGTAGCAGTGAAATGCATTGATATCATGGGGAACACCAAAGGCGAAGGCAGTTAACTGGGCCTTGTTTGACGCTGATACACGAAAGCGTGGGTA…
0770e3dfebed4d6f4e35db19739e1700	D_0__Bacteria;D_1__Patescibacteria;D_2__ABY1;D_3__Candidatus Magasanikbacteria;D_4__uncultured organism;D_5__uncultured organism;D_6__uncultured organism	TTAAGAATATTCCTCAATGGCCGAAAGGCTGAAGGAGCGACGCCGCGTGCGGGAAGACGGGCTTAGGCTTGTAAACCGCTTTTATTTGGGAAGAACGATGACTGTACCAAATGAATAAGAGGTTGCTAACTCTGTGCCAGCAGCAGCGGTAATACAGAGACCTCAAACGTTATCCGGATTTATTGGGCGTAAAGGGTCCGCAGGCGGTTATGTGCGTCACGAGTTAAATGTTAGGGCTCAACTCTAACACCGCTCGTGATACGGCATAACTAGAGTTCGGGAGAGGCACATGGAATTGCCGGTGTAGGGGTAATATCCGTTAATATCGGCAGGAACGCCAAATGCGAAAGCAATGTGCTGGAACGACACTGGCGCTCAGGGACGAAAGCGTGGGGAGCG…
66f3d552b956d0ee0d287f255931dbf1	D_0__Bacteria;D_1__Proteobacteria;D_2__Alphaproteobacteria;D_3__Rhodobacterales;D_4__Rhodobacteraceae;D_5__Sulfitobacter	TGGGGAATCTTAGACAATGGGCGCAAGCCTGATCTAGCCATGCCGCGTGTGTGATGAAGGCCTTAGGGTCGTAAAGCACTTTCGCCAGGGATGATAATGACAGTACCTGGTAAAGAAACCCCGGCTAACTCCGTGCCAGCAGCCGCGGTAATACGGAGGGGGTTAGCGTTGTTCGGAATTACTGGGCGTAAAGCGTACGTAGGCGGATCAGAAAGTAGGGGGTGAAATCCCAGGGCTCAACCCTGGAACTGCCTCCTAAACTCCTGGTCTTGAGTTCGAGAGAGGTGAGTGGAATTCCAAGTGTAGAGGTGAAATTCGTAGATATTTGGAGGAACACCAGTGGCGAAGGCGGCTCACTGGCTCGATACTGACGCTGAGGTACGAAAGTGTGGGGAGCAA…
327148f9b00d129a976e7d82795b8fec	D_0__Bacteria;D_1__Bacteroidetes;D_2__Bacteroidia;D_3__Cytophagales;D_4__Amoebophilaceae;D_5__uncultured;D_6__uncultured Flexibacteraceae bacterium	TAGGGAATATTGGTCAATGGGCGCAAGCCTGAACCAGCTATGCCGCGTGCAGGACGAAGGCCTTCAGGTCGTAATCTGCATTTATGCGAGAAAAATAAGCTTCTGAGGAAGTGAATGATGTTATCGCATGAATAAGCACCGGCTAACTCCGTGCCAGCAGCCGCGGTAAGACGGAGGGTGCAAGCGTTATCCGGATTTACTGGGTTTAAAGGGTACGTAGGCTGTTTTATAAGTCAGTGGTGAAAGCTAGCAGCTCAACTGTTAAAGTGCCATTGATACTGTAAGACTTGAGTATAGTCGAGGTGAGTGGAATTCTACATGTAGCGGTGAAATGCATAGATATGTAGAGGAACACCGATAACGAAAGTAACTCACTAGGCTATACTGACGCTGAGGTAC…
54f3033210aebfc2827ba1a40281779e	D_0__Bacteria;D_1__Bacteroidetes;D_2__Bacteroidia;D_3__Flavobacteriales;D_4__Flavobacteriaceae;D_5__Lutibacter	TGGGGAATCTTGCGCAATGGGCGAAAGCCTGACGCAGCGACGCCGCGTGAGTGATGAAGGCCTTAGGGTTGTAAAGCTCTGTGGAGGGGGACGAATAAGTGCCGGCGAATAACCGGTATGATGACGGTACCTCTTTAGCAAGCACCGGCTAACTCTGTGCCAGCAGCCGCGGTAATACGGAGGGTGCAAGCGTTATCCGGAATCATTGGGTTTAAAGGGTCCGTAGGCGGACTAATAAGTCAGGGGTGAAATCCCACAGCTTAACTGTGGAACTGCCTTTGATACTGTTAGTCTTGAGTTATATGGAAGTAGATAGAATGTGTAGTGTAGCGGTGAAATGCATAGAGATTACACAGAATACCGATTGCGAAGGCAGTCTACTACGTATATACTGACGCT…
62d4cb142ab6f0788209340ce6cde949	D_0__Bacteria;D_1__Bacteroidetes;D_2__Bacteroidia;D_3__Chitinophagales;D_4__Saprospiraceae;D_5__uncultured	TAAGGAATATTGGACAATGGGCGCAAGCCTGATCCAGCCATCCTGCGTGCAGGAAGACGGCCCTATGGGTTGTAAACTGCTTTTGTATGAGAAGAATAATTCCGATTCATCGGAATCTGACGGTATCATACGAATAAGCACCGGCTAACTCCGTGCCAGCAGCCGCGGTAATACGGAGGGTGCAAGCGTTATCCGGAATCACTGGGTTTAAAGGGTGCGTAGGCGGACTTGTAAGTCAGAGGTGAAAGCCATCAGCTTAACTGGTGGATTGCCTTTGAAACTACTTGTCTTGAATCAAGTTGAGGTTAGCGGAATGTGGCATGTAGCGGTGAAATGCATAGATATGCCATAGAACACCAATTGCGAAGGCAGCTAACTAGGCTTGTATTGACGCTGAGG…
c99321c86fd98b4933592436c047da02	D_0__Bacteria;D_1__Bacteroidetes;D_2__Bacteroidia;D_3__Cytophagales;D_4__Cyclobacteriaceae;D_5__uncultured;D_6__uncultured marine bacterium	TAGGGAATATTGGTCAATGGAGGCAACTCTGAACCAGCCATGCCGCGTGTACGAAGAAGGCGTTCTGCGTCGTAAAGTACTTTTATATGGGAAGAAACGCTTCTTGCGAGAAGCTATGACGGTACCATAAGAATAAGGACCGGCTAACTCCGTGCCAGCAGCCGCGGTAATACGGAGGGTCCGAGCGTTGTCCGGAATTATTGGGTTTAAAGGGTACGTAGGCGGATTAATAAGTCAGAGCTGAAATCCTACAGCTTAACTGTAGAACTGGCTTTGAAACTGTTAATCTTGAGTATGGTAGAGATAGGCGGAATTTATAATGTAGCGGTGAAATGCATAGATATTATAAAGAACACCGATAGCGAAGGCAGCTTGTTGGACCATAACTGACGCTAATGT…
b7af43f74db3db5b5ea1029b1fdcaa39	D_0__Bacteria;D_1__Bacteroidetes;D_2__Bacteroidia;D_3__Bacteroidales;D_4__Prolixibacteraceae;D_5__Draconibacterium;D_6__uncultured bacterium	TGAGGAATATTGGTCAATGGGCGAGAGCCTGAACCAGCCATCCCGCGTGCAGGATGACGGCCCTATGGGTTGTAAACTGCTTTTCTACGCCAAGAAATCTTGCTACGTGTAGCAGGTTGACGGTAGCGTAGGAATAAGGACCGGCTAACTCCGTGCCAGCAGCCGCGGTAATACGGAGGGTCCAAGCGTTATCCGGATTCATTGGGTTTAAAGGGTGCGCAGGTGGGAATGTAAGTCAGTGGTGAAATACTGCCGCTTAACGGTAGAACTGCCATTGATACTGCATTTCTTGAATATGGTTGAGGTAGGCGGAATGTGTTGTGTAGCGGTGAAATGCATAGATATGACACAGAACGCCAATTGCGAAGGCAGCTTACTAAGCCATTATTGACGCTGAGG…
e04beaf65835fdcf814869368db1694a	D_0__Bacteria;D_1__Proteobacteria;D_2__Deltaproteobacteria;D_3__Syntrophobacterales;D_4__Syntrophobacteraceae;D_5__uncultured	TGGGGAATATTGCACAATGGAGGAAACTCTGATGCAGCAACGCCGCGTGGAGGATGACGCATTTCGGTGTGTAAACTCCTTTTATATGGGAAGATAATGACGGTACCATATGAATAAGCACCGGCTAACTCCGTGCCAGCAGCCGCGGTAATACGGAGGGTGCAAGCGTTGTTCGGAATTATTGGGCGTAAAGAGCGTGTAGGCGGTTCGGTAAGTCAGATGTGAAAGCCCTGGGCTCAACCCAGGAAGTGCATTTGAAACTACCAGACTTGAGTACGGGAGAGGAGGGGGGAATTCCCGGTGTAGAGGTGAAATTCGTAGATATCGGGAGGAATACCAGTGGCGAAGGCGCCCCTCTGGACCGATACTGACGCTGAGACGCGAAAGCGTGGGGAGCAA…
fc500fd0f849bfa0afa30fab85da5aa6	D_0__Bacteria;D_1__Verrucomicrobia;D_2__Verrucomicrobiae;D_3__Pedosphaerales;D_4__Pedosphaeraceae;D_5__uncultured bacterium;D_6__uncultured bacterium	TCGAGAATCTTTCACAATGGGCGAAAGCCTGATGGAGCGACGCCGCGTGGGGGATGAAGGCCTTCGGGTCGTAAACCCCTGTCATCTGGGAGCAAATCTGTTCGGTTAATACCTGAGCAGTTGATAGTACCAGAAGAGGAAGGGACGGCTAACTCTGTGCCAGCAGCCGCGGTAATACAGAGGTCCCAAGCGTTGTTCGGATTCACTGGGCGTAAAGGGTGCGTAGGCGGTCGGCAAAGTCTAATGTGAAATCTCCGGGCTCAACCCGGAAACTGCATCGGATACTGGTCGGCTAGAGGATTGGAGGGGGGAGTGGAATTCTCGGTGTAGCAGTGAAATGCGTAGATATCGAGAGGAACACCAGTGGCGAAGGCGACTCCCTGGACAATTCCTGACGCT…
ca6a3497abc182fd74465e6922671c27	D_0__Bacteria;D_1__Bacteroidetes;D_2__Bacteroidia;D_3__Sphingobacteriales;D_4__Lentimicrobiaceae;D_5__uncultured Bacteroidetes bacterium;D_6__uncultured Bacteroidetes bacterium	TAAGGAATATTGGTCAATGGACGAAAGTCTGAACCAGCCATGCCGCGTGCAGGATGACAGCCCTATGGGTTGTAAACTGCTTTTATACGGGAAGAATCCCCTGTACGTGTACAGGGTTGACGGTACCGTACGAATAAGCATCGGCTAACTCCGTGCCAGCAGCCGCGGTAATACGGAGGATGCAAGCGTTATCCGGATTCATTGGGTTTAAAGGGTGCGTAGGCGGAATGATAAGTTAGTGGTGAAATCCCTCGGCTCAACCGAGGAACTGCCATTAATACTGTCATTCTTGAGTATAGTTGAAGTGGGCGGAATGTATCATGTAGCGGTGAAATGCTTAGATATGATACAGAACACCGATAGCGTAGGCAGCTTGCTAAACTATAACTGACGCTCAGG…
bfc7012b952d01a59366f9017f7741e9	D_0__Bacteria;D_1__Bacteroidetes;D_2__Bacteroidia;D_3__Bacteroidales;D_4__Bacteroidetes BD2-2	TGAGGAATATTGGTCAATGGGCGAGAGCCTGAACCAGCCATGCCGCGTGCAGGAAGACGGCCCTACGGGTTGTAAACTGCTTTTTTATGGGAAGAAAACGTTCTACGTGTAGGACACTGACGGTACCATACGAATAAGCACCGGCTAACTCCGTGCCAGCAGCCGCGGTAATACGGAGGGTGCAAGCGTTATCCGGATTTATTAGGTTTAAAGGGTGTGTAGGCGGACTTTTAAGTCAGTGGTGAAATCCTGGGGCTCAACTCCAGAACTGCCATTGATACTGAAAGTCTTGAGTACAGTTGAAGTAGGCGGAATGTGTAATGTAGCGGTGAAATGCTTAGATATTACACAGAACACCGATTGCGAAGGCAGCTTACTAAGCTGTTACTGACGCTGATG…
818dcf915c7facce5a3a4aa08c242c45	D_0__Bacteria;D_1__Nitrospinae;D_2__Nitrospinia;D_3__Nitrospinales;D_4__Nitrospinaceae;D_5__uncultured	TGGGGAATTTTGCGCAATGGGCGAAAGCCTGACGCAGCAACGCCGCGTGAGCGATGAAGGCTTTAGGGTCGTAAAGCTCTGTCAAGTGGGAAGAATCCTGACGGTACCACTGAAGGAAGCCCCGGCTAACTCCGTGCCAGCAGCCGCGGTAATACGGGGGGGGCAAGCGTTGTTCGGAATTATTGGGCGTAAAGCGTATGTAGGTGGTTGAATAAGTCAGCCGTGTAAGCCCTCGGCTCAACCGGGGAATTGCGTTTGAAACTATTCAACTTGAGTGCAGAAGAGGAAAGCGGAATTCCCAGTGTAGCGGTGAAATGCGTTGATATTGGGAAGAACACCGGTGGCGAAGGCGGCTTTCTGGTCTGCTACTGACACTGAGATACGAAAGCCAGGGGAGCG…
6c55bda670a57893880ee99e81659bb2	D_0__Bacteria;D_1__Proteobacteria;D_2__Alphaproteobacteria;D_3__Rhodobacterales;D_4__Rhodobacteraceae	TGGGGAATTTTCCGCAATGGGCGAAAGCCTGACGGAGCAATACCGCGTGAGGGATGACGGCCTATGGGTTGTAAACCTCTTTTTTCAGGGAGGAATAAAATGACGTGTACCTGAAGAATAAGCATCGGCTAGCTCCGTGCCAGCAGCCGCGGTAATACGGAGGGGGTTAGCGTTGTTCGGAATTACTGGGCGTAAAGCGCACGTAGGCGGACCAGAAAGTTGGGGGTGAAATCCCGGGGCTCAACCCCGGAACTGCCTCCAAAACTATTGGTCTAGAGTTCGAGAGAGGTGAGTGGAATTCCGAGTGTAGAGGTGAAATTCGTAGATATTCGGAGGAACACCAGTGGCGAAGGCGGCTCACTGGCTCGATACTGACGCTGAGGTGCGAAAGTGTGGGGA…
6368e4a6508f782fc237189ec7492f15	D_0__Bacteria;D_1__Planctomycetes;D_2__Planctomycetacia;D_3__Planctomycetales;D_4__uncultured;D_5__uncultured bacterium;D_6__uncultured bacterium	TCGAGAATCTTCCACAATGGGCGCAAGCCTGATGGAGCGACGCCGCGTGCGGGATGAAGGCCCTTGGGTTGTAAACCGCTGTCAGAGGGGATGAAATCGCAGGGGGCTATCCCCCTGTGTTGACAAAGCCTCAGAGGAAGCACGGGCTAAGTACGTGCCAGCAGCCGCGGTAATACGTACTGTGCGAACGTTATTCGGAATCACTGGGCTTAAAGGGTGCGCAGGCGGCCGATCAAGTCAGGTGTGAAATGCCCCGGCTCAACCGGGGCACTGCGCTTGAAACTGGTCGGCTTGAGTGAGATAGGGGTGTGCGGAACTGCCAGTGGAGCGGTGAAATGCGTTGATATTGGCAGGAACACCGGTGGCGAAAGCGGCACACTGGGTCTCAACTGACGCTCA…
1b476f5b78654e6072b443103292de02	D_0__Bacteria;D_1__Bacteroidetes;D_2__Bacteroidia;D_3__Flavobacteriales;D_4__Flavobacteriaceae;D_5__Maritimimonas;D_6__uncultured Bacteroidetes bacterium	TGAGGAATATTGGACAATGGAGGAGACTCTGATCCAGCCATGCCGCGTGCAGGAAGACGGCCCTATGGGTTGTAAACTGCTTTTATATAGGAAGAAACCTGACCACGTGTGGTTGGCTGACGGTACTATATGAATAAGCACCGGCTAACTCCGTGCCAGCAGCCGCGGTAATACGGAGGGTGCAAGCGTTATCCGGAATCATTGGGTTTAAAGGGTCCGTAGGCGGGTCATTAAGTCAGAGGTGAAATCCCACAGCTTAACTGTGGAACTGCCTTAGATACTGGTGATCTTGAGTTTTAGTGAAGTAGATAGAATGTGTAGTGTAGCGGTGAAATGCATAGATATTACACAGAATACCGATTGCGAAGGCAGTCTACTAACTAACAACTGACGCTAATG…
a640d526610f6db44015810847d0df38	D_0__Bacteria;D_1__Planctomycetes;D_2__Phycisphaerae;D_3__Phycisphaerales;D_4__Phycisphaeraceae;D_5__Urania-1B-19 marine sediment group;D_6__uncultured bacterium	TAACGAATCTTCCGCAATGCGCGAAAGCGTGACGGAGCAATGCCGCGTGCGGGATGAAGCTCTTCGGAGTGTAAACCGCTGTCAGGGGCTAGGAACACAATGACCAACCCCAAAGGAAGGGCCGGCTAACTTCGTGCCAGCAGCCGCGGTAATACGAAGGGCCCGACCGTTAATCGGAATCACTGGGCTTAAAGCGTACGTAGGCGGATGCGCAGGCATCGTGTGAAATCCCTCCGCTCAACGGAGGAACTGCACGGTGAACCGCGTGTCTTGAGATTGGTAGGGGCTGTCGGAACGATAGGTGGAGTGGTGAAATGCGTTGATATCTATCGGAACGCCGAAGGAGAAGTCAGGCAGCTGGGCCAATTCTGACGCTGAGGTACGAAAGCGTGGGGAGCG…
fc3191d1de894bc354278a3d692c1036	D_0__Bacteria;D_1__Bacteroidetes;D_2__Bacteroidia;D_3__Bacteroidales;D_4__Bacteroidetes BD2-2	TCGGGAATTTTGGGCAATGGGCGAAAGCCTGACCCAGCAACGCCGCGTGAAGGATGAAGTCTTTCGGGATGTAAACTTCGAAATTATAGGAAGAATCAATGACGGTACTATAAATAAGCTCCGGCTAACTACGTGCCAGCAGCCGCGGTAATACGGAGGATGCAAGCGTTATCCGGATTTATTGGGTTTAAAGGGTACGCAGGCGGAAAATTAAGTCAGTGGTGAAATCCTGCAGCTTAACTGTAGAACTGTCATTGATACTGGTTTTCTTGAATATAGTTGAGGTAGGCGGAATGTGTAATGTAGCGGTGAAATGCTTAGATATTACACAGAACACCGATTGCGAAGGCAGCTTACTAAGCTATGATTGACGCTGAGGTACGAAAGCGTGGGGAGCGA…
809e98b0a4af7cb72ab0a402c56bdc58	D_0__Bacteria;D_1__Actinobacteria;D_2__Coriobacteriia;D_3__OPB41;D_4__uncultured bacterium;D_5__uncultured bacterium;D_6__uncultured bacterium	TGGGGAATTTTGCGCAATGGGCGAAAGCCTGACGCAGCAACGCCGCGTGCGGGATGAAGGCCCTCGGGTTGTAAACCGCTTTCAGCAGGGATGAATATGACAGTACCTGCACAAGAAGCCCCGGCTAAATACGTGCCAGCAGCCGCGGTAATACGTATGGGGCAAGCGTTATCCGGATTCATTGGGCGTAAAGCGCGTGTAGGCGGCTTGTTAAGTCAGATGTGAAAACCGGGGGCTTAACCCGCGGCGTGCATCTGAAACTGGCAGGCTTGAGTCTGGTAGAGGAAAGTGGAATTCCTAGTGTAGCGGTGAAATGCGCAGATATTAGGAGGAACACCAGTGGCGAAGGCGGCTTTCTGGGCCACGACTGACGCTGAGACGCGAAAGCTAGGGGAGCAA…
ce3f34b47ab7377630a991b7ea23043c	D_0__Bacteria;D_1__Bacteroidetes;D_2__Bacteroidia;D_3__Flavobacteriales;D_4__Flavobacteriaceae;D_5__Aquibacter	TGAGGAATATTGGGCAATGGAGGCAACTCTGACCCAGCCATGCCGCGTGCAGGAAGACTGCCCTATGGGTTGTAAACTGCTTTTATACAGGAAGAAACAGCTCTTCGAGCAAGAGTCTTGACGGTACTGTAAGAATAAGGATCGGCTAACTCCGTGCCAGCAGCCGCGGTAATACGGAGGATCCAAGCGTTATCCGGAATCATTGGGTTTAAAGGGTCCGTAGGTGGATAATTAAGTCAGAGGTGAAATCCTGCAGCTCAACTGTAGAATTGCCTTTGAAACTGGTTATCTTGAGTCATTATGAAGTGGTTAGAATGTGTAGTGTAGCGGTGAAATGCATAGATATTACACAGAATACCGATTGCGAAGGCAGATCACTAATAATGTACTGACACTGAT…
887be636c39cf50b6bd01b4ea8d93188	D_0__Bacteria;D_1__Planctomycetes;D_2__OM190;D_3__uncultured deep-sea bacterium;D_4__uncultured deep-sea bacterium;D_5__uncultured deep-sea bacterium;D_6__uncultured deep-sea bacterium	TCGAGAATCTTCCGCAATGGACGAAAGTCTGACGGAGCGACGCCGCGTGGAGGAAGAAGGCCCTCGGGTTGTAAACTCCTGTCAGAGCTTATGAAACCCAGATGGTTAATACCCATCTGGCTGACAAAGGGCTCAAAGGAAGCCACAGCTAACTTCGTGCCAGCAGCTGCGGTAATACGAAGGTGGCGAGCGTTGTTCGGATTCACTGGGCATAAAGGGCGTGTAGGCGGCTTGGTAAGCGGTCTGTGAAATCCCGGGGCTCAACCCCGGAACTGCAGACCGAACTGCCGAGCTAGAGAACGAGAGGGGACTGTGGAACTCTAGGTGGAGCGGTGAAATGCGTAGATATCTAGAGGAACACCGGTGGCGAAAGCGACAGTCTGGCTCGTTTCTGACGCT…
184c68835cda38009ccf34b3d9eecc66	D_0__Bacteria;D_1__Proteobacteria;D_2__Alphaproteobacteria;D_3__Rickettsiales;D_4__AB1;D_5__uncultured bacterium;D_6__uncultured bacterium	TGGGGAATCTTGGACAATGGGGGAAACCCTGATCCAGCGATGCCGCGTGAGTGAAGAAGGCCCTAGGGTTGTAAAACTCTTTTACCCGTGAAGATAATGACGGTAGCGGGAGAAAAAGCTCCGGCTAACTCCGTGCCAGCAGCCGCGGTAAGACGGAGGGAGCAAGCGTTGTTCGGAATAACTGGGCGTAAAGAGCGCGTAGGTTGTTAAATTAGTTAGACGTGAAAGCCCCAGGCTCAACCTGGGAATTGCGTTTAAAACTGTTTAACTAGAGTTTGGTAGAGGAAAGTGGAATTCCTAGTGTAGAGGTGAAATTCGTAGATATTAGGAGGAACACCAGAGGCGAAGGCGACTTTCTGGGCCAATACTGACACTGAGGCGCGAAAGCGTGGGGAGCAA…
e6e534a96e4d6f218d0f65c01236c187	D_0__Bacteria;D_1__Bacteroidetes;D_2__Bacteroidia;D_3__Cytophagales;D_4__Cyclobacteriaceae;D_5__Fabibacter	TAGGGAATATTGGTCAATGGGCGAGAGCCTGAACCAGCCATGCCGCGTGTAGGAAGACGGCCTTCTGGGTTGTAAACTACTTTTATATGGGAAGAAAAAAGCTTTGCGAAGCAAATTGACGGTACCATACGAATAAGCACCGGCTAACTCCGTGCCAGCAGCCGCGGTAATACGGAGGGTGCAAGCGTTGTCCGGATTTATTGGGTTTAAAGGGTGCGTAGGCGGATCTTTAAGTCAGTGGTGAAATCCTGCAGCTTAACTGTAGAACTGCCATTGATACTGGAGATCTTGAGTATACTAGAAGTAGGCGGAATTTATGGTGTAGCGGTGAAATGCATAGATACCATAAAGAACACCGATAGCGTAGGCAGCTTACTGGAGTATAACTGACGCTGAGGC…
5944629a87c2d6842e2d9bc4563a898e	D_0__Bacteria;D_1__Bacteroidetes;D_2__Bacteroidia;D_3__Bacteroidales;D_4__Marinilabiliaceae;D_5__uncultured;D_6__uncultured bacterium	TGAGGAATATTGGTCAATGGACGCAAGTCTGAACCAGCCATGTCGCGTGCAGGAAGACAGCCCTACGGGTTGTAAACTGCTTTTATACGGGAAGAAAAAGCGCTACGTGTAGCGCCTTGCCGGTACCGTACGAATAAGGATCGGCTAACTCCGTGCCAGCAGCCGCGGTAATACGGAGGATCCAAGCGTTATCCGGATTTATTGGGTTTAAAGGGTGCGTAGGCGGATATATAAGTCAGCGGTGAAATCCTGCAGCTTAACTGTAGAATTGCCGTTGATACTGTGTATCTTGAGAGTAGATGAGGTAGGCGGAATGTGTTGTGTAGCGGTGAAATGCATAGATATAACACAGAACACCAATTGCGAAGGCAGCTTACTAAACTATATCTGACGCTGAGG…
9f0d82313caefdaf03ab6a1fe6201d30	D_0__Bacteria;D_1__Planctomycetes;D_2__Planctomycetacia;D_3__Pirellulales;D_4__Pirellulaceae;D_5__Candidatus Anammoximicrobium	TCGAGAATCTTCCGCAATGGGCGCAAGCCTGACGGAGCGACGCCGCGTGCGGGATGAAGGCCTTCGGGTTGTAAACCGCTGTCAGTGGGGAGGAAATGCATGAGGGTTCTCTCTCATGTTTGACCGATCCGCAGAGGAAGTGCAGGCTAAGTTCGTGCCAGCAGCCGCGGTAACACGAACTGCACAAACGTTATTCGGAATCACTGGGCTTAAAGAGTTCGTAGGCGGCCAGGTCAGTCGGGTGTGAAATCCCAGGGCTTAACCCTGGAATTGCAATTGAAACTGGGTGTCTAGAGTCGAGTAGAGGGGAGTGGAATTTCCGGTGTAGCGGTGAAATGCGTAGATATCGGAAGGAACATCAGTGGCGAAGGCGACTCCCTGGACTCAGACTGACGCTGA…
10617e7dfabe0b663af599ee30fe4852	D_0__Bacteria;D_1__Acidobacteria;D_2__Aminicenantia;D_3__Aminicenantales;D_4__uncultured Nitrospirae bacterium;D_5__uncultured Nitrospirae bacterium;D_6__uncultured Nitrospirae bacterium	TGAGGAATTTTGCGCAATGGGGGAAACCCTGACGCAGCGACGCCGCGTGGAGGATTAAGGCCTTCGGGTTGTAAACTCCTGTCAGTGGTGAAGAATGCCCTTCGGGGTTTGACGGTAACCACAGAGGAAGTCCCGGCTAACTACGTGCCAGCAGCCGCGGTAATACGTAGGGGACGAACGTTGCTCGGAATTACTGGGCGTAAAGGGTGCGTAGGTGGCTGAGTAAGTCGTAGATGAAATCCCCGGGCTCAACTCGGGAACTGTCTCCGAAACTGCTCAGCTTGAGGATGGTTGAGGAAAGCGGAATTCCCGGTGGAGCGGTGAAATGCGTAGATATCGGGAGGAACACCAGAGGCGAAGGCGGCTTTCTGGGCCATTCCTGACACTCATGCACGAAAG…
694b1aa930207738b9d1d51f59770965	D_0__Bacteria;D_1__Planctomycetes;D_2__Planctomycetacia;D_3__Pirellulales;D_4__Pirellulaceae;D_5__Bythopirellula	TCGAGAATCTTCGGCAATGGGCGAAAGCCTGACCGAGCGATGCCGCGTGCGGGATGAAGGCCCTCGGGTTGTAAACCGCTGTCAGTTGGGAGGAAGGCTTCGTGAAGAGCGAAGTTTGACCTATCTTCAGAGGAAGTCCGGGCTAAGTTCGTGCCAGCAGCCGCGGTAACACGAACCGGACAAACGTTATTCGGAATTATTGGGCTTAAAGGGTGCGTAGGCGGCTTAGTAGGTGGGGTGTGAAAGCCCTCGGCTCAACCGAGGAATTGCGCCCCAAACCCCTAAGCTAGAGGGAGACAGAGGTAAGCGGAACTGATGGTGGAGCGGTGAAATGCGTTGATATCATCAGGAACACCAGTTGCGAAGGCGGCTTACTGGGTCTCTTCTGACGCTGAGGCA…
2efdf37e4937dd7dfe189abe48346995	D_0__Bacteria;D_1__Planctomycetes;D_2__OM190	TCGAGAATCTTCCGCAATGGGCGAAAGCCTGACGGAGCGACACCGCGTGCAGGATGAAGGCCTTCGGGTTGTAAACTGCTGTCACGCTATAGGAATGGACTGTCGTTAATAGCGGCAGTATTGACCAAAGCGAGAGGAAGCACCGGCTAACTCCGTGCCAGCAGCCGCGGTAAGACGGAGGGTGCAAACGTTGTTCGGAATCACTGGGCATAAAGCGCGCGTAGGCGGTCTACCCAGTTAGGTGTGAAAGCCCTCGGCTCAACCGAGGAATTGCATCTAATACTAGTAGGCTTGAGGATGGTAGGGGTGTGCGGAACTTCAGGTGGAGCGGTGAAATGCGTAGATATCTGAAGGAACACCCGTGGCGAAAGCGGCACACTGGATCATTTCTGACGCTGA…
e0cdd29ca0cc457fb202e644e67b1f5c	D_0__Bacteria;D_1__Proteobacteria;D_2__Gammaproteobacteria;D_3__Gammaproteobacteria Incertae Sedis;D_4__Unknown Family;D_5__uncultured;D_6__uncultured marine bacterium	TGGGGAATATTGCACAATGGGCGCAAGCCTGATGCAGCAATGCCGCGTGTGTGAAGAAGGCCTGCGGGTTGTAAAGCACTTTTATTAGGAAAGAAAAACCCGGAATTAATACTTCCGGCATTGACGGTACCTAAAGAATAAGCACCGGCTAACTCAGTGCCAGCAGCCGCGGTAATACTGAGGGTGCAAGCGTTAATCGGAATTACTGGGCGTAAAGCGAGTGTAGGCGGCTATTTAAGTCGGATGTGAAATCCCCGGGCTCAACCTGGGAATTGCATTCGATACTGGATAGCTAGAGGGCGACAGAGGGAGGTGGAATTCCCGATGTAGTGGTGAAATGCGTAGATATCGGGAGGAACACCAGTGGCGAAGGCGGCCTCCTGGGTCGCCCCTGACGCT…
930fa62f0fe321514cc9ca14393a7777	D_0__Bacteria;D_1__Planctomycetes;D_2__Planctomycetacia;D_3__Pirellulales;D_4__Pirellulaceae;D_5__Pir4 lineage;D_6__uncultured bacterium	TCGAGAATCTTCGGCAATGGACGCAAGTCTGACCGAGCGACGCCGCGTGCGGGATGAAGGCTTTCGGGTTGTAAACCGCTGTCAGAGGGGAGGAAATCTCCAGGGGCTATCCCCTGGAGTTGACCTATCCTCAGAGGAAGGACGGGCTAAGTTCGTGCCAGCAGCCGCGGTAACACGAACCGTCCGAACGTTATTCGGAATCACTGGGCTTAAAGGGTGCGTAGGCGGCGTGGTAAGTGAGGTGTGAAAGCCCTCGGCTCAACCGAGGAATTGCGCTTCATACTGCCACACTCGAGGGAGACAGAGGTAAGCGGAACTGATGGTGGAGCGGTGAAATGCGTTGATATCATCAGGAACACCAGTGGCGAAAGCGGCTTACTGGGTCTCTTCTGACGCTGA…
ec2b11feef400a0b40359144d2fdc082	D_0__Bacteria;D_1__Kiritimatiellaeota;D_2__Kiritimatiellae;D_3__WCHB1-41;D_4__uncultured Verrucomicrobia bacterium;D_5__uncultured Verrucomicrobia bacterium;D_6__uncultured Verrucomicrobia bacterium	TCGAGGATCATTGACAATGCGCGAAAGCGTGATCATGCGACGCTGCGTGGAGGATGAAGGCCTTCGGGTTGTAAACTCCTGTCATCCGGGAAAAATAGCATCGGAATTAACCTCCTTTGTTTGATGGTACCGGAAGAGGAAGCCACGGCTAACTCTGTGCCAGCAGCCGCGGTAATACAGAGGTGGCAAGCGTTGTTCGGATTTACTGGGCGTAAAGCGTGCGTAGGTGGTTCTGTATGTCGGATGTGAAAGCCCACGGCTCAACCGTGGAACTGCATTCGAAACTGCAGAGCTTGAGTGCAGGAGGGGAGAGCGGAATTCTTGGTGTAGCGGTGAAATGCGTTGATATCAAGAAGAACACCGGTGGCGAAGGCGGCTCTCTGGAATGTTACTGACACT…
a74b4669d5bd439bfb7543515afb67cb	D_0__Bacteria;D_1__Bacteroidetes;D_2__Bacteroidia;D_3__Flavobacteriales;D_4__Cryomorphaceae;D_5__uncultured	TGAGGAATATTGGTCAATGGAGGCAACTCTGAACCAGCCATGCCGCGTGCAGGAATAATGCCCTATGGGTTGTAAACTGCTTTTATACAGGAAGAACTACAGATACGAGTATTTGTTTGACGGTACTGTTTGAATAAGGACCGGCTAACTCCGTGCCAGCAGCCGCGGTAATACGGAGGGTCCAAGCGTTATCCGGATTCATTGGGTTTAAAGGGTCCGTAGGCGGATAAATAAGTCAGTGGTGAAATCCTACAGCTCAACTGTAGAACTGCCATTGATACTGTTAATCTTGAATAATAATGAAGTGGGTAGAATATGTAGTGTAGCGGTGAAATGCATAGATATTACATAGAATACCGATTGCGAAGGCAGCCCACTAATTATATATTGACGCTGAGG…
4bdb4daa36181ce6855dff27bfa44534	D_0__Bacteria;D_1__Planctomycetes;D_2__Phycisphaerae;D_3__Phycisphaerales;D_4__Phycisphaeraceae;D_5__uncultured;D_6__uncultured bacterium	TAACGAATATTCCGTAATGCGCGAAAGCGTGACGGAGCAATGCCGCGTGAAGGATGAAGCACCTCGGTGTGTAAACTTCTGTCAGGGTTTAGGAAACAAATGACCATACCCAAAGGAAGAGCCGGCTAACTCTGTGCCAGCAGCCGCGGTAATACAGAGGGCTCAAGCGTTAATCGGAATCACTGGGCTTAAAGGGTGCGCAGGCGGACTCGTCAGTGTCTTGTGAAATCCCATGGCTCAACCATGGAACTGCAGGGCATACTGCGAGTCTTGAACCCGACAGGGGCAACCGGAACTCTAGGTGGAGCGGTGAAATGCGTAGATATCTAGAGGAACGCCAAAGGCGAAGGCAGGTTGCTGGGTCGGTGTTGACGCTCAGGCACGAAAGCGTGGGTAGCG…
ce8467a6b5ece014e5baa920faddc8b9	D_0__Bacteria;D_1__Chloroflexi;D_2__KD4-96;D_3__uncultured bacterium;D_4__uncultured bacterium;D_5__uncultured bacterium;D_6__uncultured bacterium	TGAGGAATATTGCCCAATGGACGCAAGTCTGAGGCAGCAACGCCGCGTGGGTGATGAAGGCCTTCGGGTTGTAAAACCCTTTTCTGGGGGACGAGGAAGGACGGTACCTCAGGAATAAGTCACGGCTAACTACGTGCCAGCAGCCGCGGTAATACGTAGGTGGCGAGCGTTATCCGGATTTACTGGGCGTAAAGAGCGCGCAGGCGGTCAGATAAGTCGAATGTGAAAGCCCCCGGCTCAACTGGGGAAGGTCATTCGATACTGTTTGACTTGAAGATGGGAGAGGGAAGCGGAATTTCAGGTGTAGTGGTGAAATGCGTAGATATCTGAAGGAACACCAGTGGCGAAGGCGGCTTTCTGGCCCATTCTTGACGCTGAGGCGCGAAAGCTAGGGGAGCG…
4226aa4affac77b4a1b3cfd15ad551f3	D_0__Bacteria;D_1__Proteobacteria;D_2__Gammaproteobacteria;D_3__Cellvibrionales;D_4__Halieaceae	TGGGGAATATTGGACAATGGGGGCAACCCTGATCCAGCAATGCCGCGTGTGTGAAGAAGGCCTGCGGGTTGTAAAGCACTTTCAGTAGGGAAGAGGGTGGCCGAGTAACGATCGGTCATTGACGTTACCTACAGAAGAAGCACCGGCTAACTCCGTGCCAGCAGCCGCGGTAATACGGAGGGTGCGAGCGTTAATCGGAATTACTGGGCGTAAAGCGCGCGTAGGCGGTTATTTAAGTCGGATGTGAAAGCCCCGGGCTCAACCTGGGAACTGCATTCGATACTGGGTAACTAGAGTACGAGAGAGGGAGGTAGAATTCCACGTGTAGCGGTGAAATGCGTAGATATGTGGAGGAATACCGGTGGCGAAGGCGGCCTCCTGGCTCGATACTGACGCTGA…
e1ed2641b062dbe6b93040631bd73dbc	D_0__Bacteria;D_1__Proteobacteria;D_2__Deltaproteobacteria;D_3__Myxococcales;D_4__Sandaracinaceae;D_5__uncultured;D_6__bacterium enrichment culture clone 33(2013)	TGAGGAATATTGGGCAATGGGCGAAAGCCTGACCCAGCCACGCCGCGTGTGTGATGAAGGCCTTCGGGTCGTAAAGCACTGTGGGGAGAGACGAACATACGCTTGAGGAAATGCTTGCGTACTGACGGTACCTCCTTAGCAAGCACCGGCTAACTCTGTGCCAGCAGCCGCGGTAATACAGAGGGTGCGAACGTTGCTCGGATTTACTGGGCGTAAAGCGCGTGTAGGCGGACTCGCAAGTCGGTTGTGAAATCCCTGGGCTCAACCTAGGAACTGCATCCGAAACTGCTTGTCTTGAGTAATGGAGAGGGTGGCGGAATTCCCGGTGTAGAGGTGAAATTCGTAGATATCGGGAGGAAGACCAATGGCGAAGGCAGCCTGCTGACATTTACTGACGCT…
f0ae3115f464ce476d83165361cd3b58	D_0__Bacteria;D_1__Proteobacteria;D_2__Alphaproteobacteria;D_3__Rickettsiales;D_4__SM2D12	TAGGGAATATTGGACAATGGGGGCAACCCTGATCCAGCCATGCCGCGTGAGTGATGAAGGCCTTAGGGTTGTAAAACTCTTTCAACGGTGAAGATGATGACGGTAACCGTAGAAGAAGCCCCGGCTAACTTCGTGCCAGCAGCCGCGGTAATACGAAGGGGGCTAGCGTTGTTCGGAATTACTGGGCGTAAAGCGCGTGTAGGCTGGCTACCAAGCCAGAGGTGAAATCCCGGAGCTTAACTCCGGAACTGCCTTTGGAACTGGTAGCCTAGAATCCTGGAGGGGGTGGTGGAATTCCTAGTGTAGAGGTGAAATTCGTAGATATTAGGAGGAACACCGGTGGCGAAGGCGACCACCTGGACAGGTATTGACGCTGAGACGCGAAAGCGTGGGGAGCAA…
5193d13201e562f69c40011df78f9f2d	D_0__Bacteria;D_1__Proteobacteria;D_2__Gammaproteobacteria;D_3__Cellvibrionales;D_4__Halieaceae	TGGGGAATATTGGACAATGGGCCACAAGCCTGATCCAGCAATTCTGTGTGCACGATGAAGGTTTTAGGATCGTAAAGTGCTTTCAGCAGGGAAGAAAAAAATGACGGTACCTTTAGAAGAAGCACCGGCTAACTCCGTGCCAGCAGCCGCGGTAATACGGAGGGTGCAAGCGTTAATCGGAATTACTGGGCGTAAAGCGCGCGTAGGCGGTTAGTTAAGTCGGATGTGAAAGCCCTGGGCTCAACCTGGGAACTGCATTCGATACTGGCCAACTAGAGTACGAGAGAGGGAGGTAGAATTCCACGTGTAGCGGTGAAATGCGTAGATATGTGGAGGAATACCAGTGGCGAAGGCGGCCTCCTGGCTCGATACTGACGCTGAGGTGCGAAAGCGTGGGGA…
ff85add7b9fc34bad651f9d5a715132f	D_0__Bacteria;D_1__Bacteroidetes;D_2__Bacteroidia;D_3__Flavobacteriales;D_4__Flavobacteriaceae	TGAGGAATATTGGACAATGGGCGCAAGCCTGATCCAGCCATGCCGCGTGCAGGAAGACAGCCCTACGGGTTGTAAACTGCTTTTATACGGGAAGAATAATCACGACGTGTCGTGAGGTGACGGTACCGTAAGAATAAGGACCGGCTAACTCCGTGCCAGCAGCCGCGGTAATACGGAGGGTCCGAGCGTTATCCGGAATCATTGGGTTTAAAGGGTCCGCAGGCGGGCGATTTAGTCAGGGGTGAAATGGTGCGGCTCAACCGTAGCACTGCCCTTGATACTGGTCGTCTTGAGTCATGGAGAGGGTGGCGGAATTCCCGGTGTAGAGGTGAAATTCGTAGATATCGGGAGGAACATCAGTGGCGAAGGCGGCCACCTGGACATTTACTGACGCTGAGA…
a4abf7f85de7f961ab6bd78b5b6debfa	D_0__Bacteria;D_1__Bacteroidetes;D_2__Bacteroidia;D_3__Chitinophagales;D_4__Saprospiraceae;D_5__Aureispira	TAAGGAATATTGGTCAATGGAGGGAACTCTGAACCAGCCATGCCGCGTGTGTGATGAATGCCCTTTGGGTTGTAAAGCACTTTTATCTGGGAAGAATGGCCGTCATTTATGATGGACGCGACGGTACCAGAAGAATAAGCACCGGCTAACTCCGTGCCAGCAGCCGCGGTAATACGGAGGGTGCAGGCGTTGTCCGGAATCACTGGGTTTAAAGGGTACGTAGGCGGTTATATAAGTCAGACGTCAAAGGCCACGGCTAAACCGTGGTACGCGTTTGAAACTGTATAACTTGAATATGATCGAGGTGCATGGAATGCTTCATGTAGCGGTGAAATGCATAGATATGAAGTAAAACACCAATTGCGAAGGCAGTGCACTAGGTCATGATTGACGCTGAGG…
e8ea0fcc9296748d19b39c6fe833a62c	D_0__Bacteria;D_1__Patescibacteria;D_2__Parcubacteria;D_3__Candidatus Moranbacteria;D_4__uncultured bacterium;D_5__uncultured bacterium;D_6__uncultured bacterium	TCGAGAATATTCCACAATGGGCGAAAGCCTGATGGAGCGACACCGCGTGCGAGATGAAGGCCCTAGGGTCGTAAATCGCTTTTATTAGGGATCAATGTACTGAGCGTACCTAATGAATAAGAGGTTACTAACTCTGTGCCAGCAGTAGCGGTAATACAGAGACCTCAAGCGTTATCCGGATTTATTGGGCGTAAAGCGTATGTAGGCGGGTGTGTTAGTCGTGGGTCAAATTTCCGAGCTTAACTCGGGGGCTGCTTACGAAACGGCACATCTAGAGAAAGTGAGAGATGACTGGAACTCATGGTGTAGTAGTGAAATGCGTTGATATCATGGGGAACACCAAAGGCGAAGGCAGGTCATTGGCACTTTTCTGACGCTGAGATACGAAAGCGTGGGTAG…
c18756cb0a2d25dab1bf6f6eac95fbb9	D_0__Bacteria;D_1__Bacteroidetes;D_2__Bacteroidia;D_3__Bacteroidales;D_4__Bacteroidetes BD2-2;D_5__uncultured bacterium;D_6__uncultured bacterium	TGAGGAATATTGGTCAATGGGGGCAACCCTGAACCAGCCATGCCGCGTGGAGGAAGACGGCCCTACGGGTTGTAAACTCCTTTTTTACGGGAATAATGGTTTCTACGTGTAGAGATTTGAAGGTACCGTACGAATAAGCATCGGCTAACTCCGTGCCAGCAGCCGCGGTAATACGGAGGATGCAGGCGTTATCCGGATTTATTAGGTTTAAAGGGTGCGCAGGCGGTCTTTTAAGTCAGTGGTGAAAGTTTGCAGCTCAACTGTAAAATTGCCATTGATACTGGAAGACTTGAATATAGTAGAGGTAGGCGGAATGTGTAGTGTAGCGGTGAAATGCTTAGATATTACACAGAACACCGATTGCGAAGGCAGCTTACTATGCTATTATTGACGCTGAGG…
ed79ba4f5b104e6936abc8410677e763	D_0__Bacteria;D_1__Chloroflexi;D_2__Anaerolineae;D_3__SBR1031;D_4__uncultured organism;D_5__uncultured organism;D_6__uncultured organism	CAGGGAATATTGCACAATGGACGGAAGTCTGATGCAGCGACGCCGCGTGGATGATGAAGGCCCTCTGGTTGTAAAATCCTTTTCAGTGGGACGAGGAAGGACGGTACCATTGGAATAAGCGTCGGCTAACTACGTGCCAGCAGCCGCGGTAAGACGTAGGACGCAAGCGTTATCCGGATTTACTGGGCGTAAAGCGTCTGTAGGCGGAGTGGTAAGTTGGGCGTGAAAGCTCCGGGCTCAACCCGGAGAGGTCGTTCAATACTGCCAAACTAGAGGGCATCAGAGGAGCGTGGAATTTCCGGTGTAGCGGTAAAATGCGCAGATATCGGAAGGAACACCAATGGCGAAGGCAGCGCTCTGGGATGCTTCTGACGCTAAGAGACGAAAGCTAGGGGAGCG…
89fb96e07ffa543fda26c5c37d6c8a03	D_0__Bacteria;D_1__Proteobacteria	TGGGGAATATTGGACAATGAACGGAAGTTTGATCCAGTGACATTTTATGGGTGAACTGAAGGCAATCTGTCGTAAAGCCCTTTCATCAAAAAAGATAATGACTAATATTGAAAAGAAGTCCTGGCTAAACTCTGTGCCAGCAGCCGCGGTAATACAGGGGGGGCAAGCATTATTCATCATTAATTGGCGTAAAGCGTATGCATGCAAGTACTAAAAATTTTTATAAAAGATTAGAAAGAACTTTTAGTTATATATTAATAATTAAGTATTTTAAAGTTAAAAAGAAAATAAGAGAATTTTTAGTGTAAAGGTAAAATTTTATCATATTAAAAAGAATACCAAAGGCGAAGGCACTTATTTATTTTTAACTAACGTTCAGATACGAAAGCATGGGTAGCG…
cafe7b80b3c4444fc94c6dd50fcbc08c	D_0__Bacteria;D_1__Planctomycetes;D_2__Phycisphaerae;D_3__Phycisphaerales;D_4__Phycisphaeraceae;D_5__Urania-1B-19 marine sediment group	CAACGAATCTTCCGCAATGCGCGAAAGCGTGACGGAGCAATGCCGCGTGCAGGATGAAGCCCTTCGGGGTGTAAACTGCTGTCAGGGTTCAGCAACACAATGAGCAGACCCAAAGGAAGGGCCGGCTAACTTCGTGCCAGCAGCCGCGGTAATACGAAGGGCCCGAGCGTTGCGCGGAATCATTGGGCTTAAAGCGTACGTAGGCGGACGAGCAGGCACCTTGTGAAATCCCTCGGCTCAACCGAGGAATTGCTTGGTGAACCGCTCGTCTTGAGGCAAGTAGGGGCTGTCGGAACGATAGGTGGAGCGGTGAAATGCGTTGATATCTATCGGAACGCCAAAGGTGAAGACAGGCAGCTGGGCTTGTTCTGACGCTGAGGTACGAAAGCGTGGGGAGCG…
836bdc51d00a00e4ea4aac49debb5ab1	D_0__Bacteria;D_1__Proteobacteria;D_2__Deltaproteobacteria;D_3__SAR324 clade(Marine group B);D_4__uncultured proteobacterium;D_5__uncultured proteobacterium;D_6__uncultured proteobacterium	TTGGGAATCTTGCGCAATGGGCGAAAGCCTGATGCAGCAATCCCGCGTGAGTGACGAAGGCCCTCGGGTCGTAAAGCTCTTTCAGCAGGAAAGATGATGACGGTACCTGCAGAAGAAGCACCGGCTAACTACGTGCCAGCAGCCGCGGTAATACGTAGGGTGCAAGCGTTGTTCGGAATTATTGGGCGTAAAGAGCGTGTAGGCGGTTTGTTAAGTCTGATGTGAAAGCCCGAGGCTCAACCCCGGAAGTGCATTGGATACTGGCAAGCTAGAGGATGAGAGAGGGAAGTGGAATTCCAGGTGTAGGGGTGAAATCCGTAGATATCTGGAGGAACATCGGAGGCGAAGGCGGCTTCCTGGCTCATTTCTGACGCTGAGACGCGAAAGCGTGGGTAGCAA…
7132cb0b7da724ff051c94a9d375b690	D_0__Bacteria;D_1__Patescibacteria;D_2__ABY1;D_3__Candidatus Kerfeldbacteria;D_4__uncultured bacterium;D_5__uncultured bacterium;D_6__uncultured bacterium	TCAAGAATATTCCCCAATGGACGAAAGTCTGAGGGAGCGACATCGCGTGGTAGAAGAAGCCCTTCGGGGTGTAAATACCTTTTATGTGGGACGAACAAATGACGGTACCACATGAATAAGGGGCTGCTAAACTCGTGCCGGCAGCAGCGGTAATACGAGTGCCCCAAGCGTTATCCGGATTTATTGGGCGTAAAGCATCCGCAGGCGGTTAGTTAAGTTAATTGTTAAATCTCAGGGCTCTACTCTGAGGCCGCAATTAATACAGGCTAACTAGAGGCTGGGAGAGGTAGATGGAATTGCCGGTGTAGTAGTAAAATGCGTTAATATAGGCAGGAACACCAAAAGCGAAAGCATTCTACTGGAACAGTCCTGACGCTCAGGGACGAAAGCGTGGGTAGC…
e1406c28c741a07378a9c7097ca2cf2e	D_0__Bacteria;D_1__Proteobacteria;D_2__Gammaproteobacteria	TGGGGAATATTGGACAATGGGGGCAACCCTGATCCAGCAATGCCGCGTGTGTGAAGAAGGCTTGCGGGTTGTAAAGCACTTTTGTTGAGGAAGAAGGCTTAGTTGTGAAAAGTAACTAAGTTGACGTTACTCAAAGAATAAGCACCGGCTAACTCCGTGCCAGCAGCCGCGGTAATACGGAGGGTGCAAGCGTTAATCGGAATGACTGGGCGTAAAGGGTTCGTAGGTGGCTTGCTAAGTTGGATGTGAAAGCCCCGGGCTTAACCTGGGAAGGTCATACAAGACTGGTGAGCTAGAGTACAGTAGAGGGCAGGGGAATTTCCGGTGTAGCGGTGAAATGCGTAGATATCGGAAGGAATACCGGTGGCGAAGGCGCCTGCCTGGGCTGACACTGACACT…
fc35d071f44421772c1dfe72815a2337	D_0__Bacteria;D_1__Planctomycetes;D_2__Phycisphaerae;D_3__MSBL9;D_4__SG8-4;D_5__uncultured organism;D_6__uncultured organism	TAACGAATATTGCGCAATGGGCGAAAGCCTGACGCAGCGACGCCGCGTGTAGGAGGAAGTCCCTCGGGATGTAAACTACTGTCAGGGGTAAGAAAGTGTGCTTCGGCACATTGATCTAACCCAGAGGAAGTCACGGCTAACTTCGTGCCAGCAGCCGCGGTAAGACGAAGGTGGCTAGCGTTGTTCGGTGTCACTGGGCTTAAAGAGTATGTAGGCGGAAAAGTAAGCGTTTTGTGAAATCCCTCGGCTTAACCGAGGAATCGCTTAGCGAACTACTTTTCTTGAGGCAAGTAGGGGTGCATGGAACTCTTGGTGGAGCGGTGGAATGCGTAGATATCAAGAGGAACGCCAATGGAGAAATCAGTGCACTGGGCTTGTCCTGACGCTGAGATACGAAAG…
68852d126a61c9969d6e9eb7d62143af	D_0__Bacteria;D_1__Bacteroidetes;D_2__Bacteroidia;D_3__Cytophagales;D_4__Amoebophilaceae;D_5__uncultured	TAGGGAATATTGGTCAATGGGCGAAAGCCTGAACCAGCTATGCCGCGTGCAGGATGAAGGTCTTTTGATTGTAAACTGCTTTTATGTAGGAAAAACAAGTCTCCGAGGAGACCCATGATGGTACTACATGAATAAGCACCGGCTAACTCCGTGCCAGCAGCCGCGGTAAGACGGAGGGTGCAAGTGTTATCCGGATTTACTGGGTTTAAAGGGTGTTAAGGCGGTCGTATAAGTCGATAGTGAAAGCTAGCAGCTCAACTGCTAAGGTGCTGTCGATACTGTATGACTTGAGTCTAGTGGAAGTAAGTGGAATTCTGCATGTAGCGGTAAAATGCTTAGATATGCAGAGGAACACCGATAACGAAGGTAGCTTACTATGCTACGACTGACGCTGACACA…
549a392b8cb13eb59952bd054ff5c4fd	D_0__Bacteria;D_1__Chloroflexi;D_2__Anaerolineae;D_3__SBR1031;D_4__uncultured bacterium;D_5__uncultured bacterium;D_6__uncultured bacterium	TGAGGAATATTGCACAATGGGGGCAACCCTGATGCAGCAATGCCGCGTGAGTGAAGAAGGCTTTCGAGTCGTAAAGCTCTTTTCTGTGGGAAGAGAGAGGACGGTACCACAGTAATAAGTCCCGGCTAACTACGTGCCAGCAGCCGCGGTAAAACGTAGGGGGCAAGCGTTATCCGGAATTATTGGGCGTAAAGCGCGTGTAGGCGGTTTGTTAAGTTGGTTGTGAAAGCTCCTGGCTCAACTGGGAGAGGTCAATCAAAACTGATAGACTTGAGGCAGGCAGAGGGACATGGAATTCCCGGTGTAGTGGTGGAATGCGTAGAGATCAGGAGGAACCTCAGAGGCGAAAGCGATGTCCTGGACCTGTTCCTGACGCTGAGATGCGAAAGCGTGGGTAGC…
e6086eca1722cb06bea2511edb70423a	D_0__Bacteria;D_1__Proteobacteria;D_2__Deltaproteobacteria;D_3__PB19;D_4__uncultured deep-sea bacterium;D_5__uncultured deep-sea bacterium;D_6__uncultured deep-sea bacterium	TGGGGAATTTTGCGCAATGGGCGGAAGCCTGACGCAGCAACGCCGCGTGTGTGATGAAGGCCTTCGGGTTGTAAAGCACTGTCTAGAGGGAAGAACAAGCGGGGTTTACACCTCGGCCTGACGGTACCTCTAAAGAAAGCACTGGCTAACTCCGTGCCAGCAGCCGCGGTAATACGGAGAGTGCAAGCGTTGTTCGGAATCATTGGGCGTAAAGGGCGTCTAGGTGGCCTGGCAAGTCAGATGTGAAATCCCTCGGCTTAACCGAGGACGTGCATTTGAAACTGCTAGGCTTGAGTGTCGGAGGGGGTAGCGGAATTCCCGGTGTAGAGGTGAAATTCGTAGATATCGGGAGGAACACCAGTGGCGAAGGCGGCTACCTGGCCGAACACTGACACTGAA…
3f9f967abe15d64cf5dc72ebc51d0f4e	D_0__Bacteria;D_1__Firmicutes;D_2__Clostridia;D_3__Clostridiales;D_4__Lachnospiraceae	TGGGGAATATTGCACAATGGGGGAAACCCTGATGCAGCGACGCCGCGTGAAGGATGAAGGTTTTCGGATCGTAAACTTCTATCAGCAGGGAAGATAGTGACTGTACCTGACTAAGAAGCCCCGGCTAACTACGTGCCAGCAGCCGCGGTAATACGTAGGGGGCAAGCGTTATCCGGAATTACTGGGTGTAAAGGGTGCGTAGGCGGTTTACTAAGTCAGATGTGAAAGCCCAAGGCTCAACTTCGGGACTGCATTTGAAACTGGTAAACTAGAATACAGGAGAGGTAAGTGGAATTCCTAGTGTAGCGGTGAAATGCGTAGATATTAGGAGGAACACCAGTGGCGAAGGCGACTTACTAGACTGTTATTGACGCTGAGGCACGAAAGCGTGGGGAGCAA…
34a3285e83a9d49454f449c02a6c81ab	D_0__Bacteria;D_1__Bacteroidetes;D_2__Bacteroidia;D_3__Cytophagales;D_4__Cyclobacteriaceae;D_5__Fabibacter;D_6__uncultured bacterium	TAGGGAATATTGGTCAATGGGCGAGAGCCTGAACCAGCCATGCCGCGTGTAGGAAGACGGCCTTCTGGGTTGTAAACTACTTTTATATGGGAAGAAAAACGCCTTGCGAGGCAAATTGACGGTACCATACGAATAAGCACCGGCTAACTCCGTGCCAGCAGCCGCGGTAATACGGAGGGTGCAAGCGTTGTCCGGATTTATTGGGTTTAAAGGGTGCGTAGGCGGATCTTTAAGTCAGTGGTGAAATCCTGCAGCTTAACTGTAGAACTGCCATTGATACTGGAGATCTTGAGTATACTAGAAGTAGGCGGAATTTATGGTGTAGCGGTGAAATGCATAGATACCATAAAGAACACCGATAGCGTAGGCAGCTTACTGGAGTATAACTGACGCTGAGGC…
f59983b550eb864637de7b160372b575	D_0__Archaea;D_1__Nanoarchaeaeota;D_2__Nanohaloarchaeia;D_3__Deep Sea Euryarchaeotic Group(DSEG);D_4__uncultured archaeon;D_5__uncultured archaeon;D_6__uncultured archaeon	ACACGGAACCTCCACAATGCACGTAAGTGTGATGGGGGGATCCCTTGTGCTGGCGTTATTCGTCAGCTTTTGTAGAGTGTAATGTGCTTTACGAATAAGAGGTGGGCAATACCGGTGCCAGCCGCCGCGGTAATACCGGAGCCTCGAGTGGTGATCACGATTATTGGGCCTAAAGCATCCGTAGCCGGACTGTAAAGTTCTCTGTGAAATCTAATGGCTAAACTGTTAGGCGTGCAGAGAAGACTTATTGTCTAGAGACCGGGAGAAGTTAAGGGAATGCTGGGGGGAGCGGTAAAATGTTGTAATCCTCGGTGGACCATCAGTGGCGAAGGCGCTTAACTAGAACGGGTCTGACGGTGTGGGATGAAAGCTAGGGGAGCAAACC
83cd2f859f1cb43be412b6101b04bd65	D_0__Bacteria;D_1__Planctomycetes;D_2__Planctomycetacia;D_3__Pirellulales;D_4__Pirellulaceae;D_5__Blastopirellula;D_6__uncultured bacterium	TCGAGAATCTTCCGCAATGGACGAAAGTCTGACGGAGCGATGCCGCGTGCGGGATGAAGGCCTTCGGGTTGTAAACCGCTGTCAGTGGGGTGGAAATGCATTGGGGCTATCCCCAGTGTTTGACCTAACCGCAGAGGAAGTCCGGGCTAAGTACGTGCCAGCAGCCGCGGTAATACGTACCGGACGAACGTTATTCGGAATCACTGGGCTTAAAGAGTGCGTAGGCGGCCTTTCAGGTGGGGTGTGAAAGCCCACGGCTCAACCGTGGAATTGCGCTCCAAACCGTTTGGCTTGAGGGAGACAGGGGTGAGCGGAACTGATGGTGGAGCGGTGAAATGCGTTGATATCATCAGGAACACCCGTGGCGAAGGCGGCTCACTGGGTCTCTACTGACGCTGA…
885c4076621538495e9c755b0f30bd9c	D_0__Bacteria;D_1__Bacteroidetes;D_2__Bacteroidia;D_3__Cytophagales;D_4__Cyclobacteriaceae;D_5__Marinoscillum	TAGGGAATATTGGTCAATGGGCGAGAGCCTGAACCAGCCATGCCGCGTGCAGGAAGACGGCCTTCTGGGTTGTAAACTGCTTTTATATGGGAAGAAAATGCCCTTGCGAGGGAAATTGCCGGTACCATATGAGTAAGCACCGGCTAACTCCGTGCCAGCAGCCGCGGTAATACGGAGGGTGCAAGCGTTGTCCGGATTTATTGGGTTTAAAGGGTGCGTAGGCGGCCGATTAAGTCAGTGGTGAAAGCCAACAGCTCAACTGTTGAACTGCCATTGATACTGGTTGGCTTGAGTTCTGTTAAGGTAGGCGGAATTGATGGTGTAGCGGTGAAATGCATAGATACCATCAGGAACACCGATTGCGAAGGCAGCTTACCGGGCATGAACTGACGCTAATGC…
a35ca727ec491ac7ac7d4ad2c983ebb2	D_0__Bacteria;D_1__Bacteroidetes;D_2__Bacteroidia;D_3__Cytophagales;D_4__Cyclobacteriaceae;D_5__uncultured;D_6__uncultured Bacteroidetes bacterium	TAGGGAATATTGGTCAATGGTCGAAAGACTGAACCAGCCATGCCGCGTGCAGGAAGACGGCCTTCTGGGTTGTAAACTGCTTTTCTCAAGGAAGAAAAATTCCGACGTGTCGGAAGATTGACGGTACTTGAGGAATAAGCACCGGCTAACTCCGTGCCAGCAGCCGCGGTAATACGGAGGGTGCAAGCGTTGTCCGGATTTATTGGGTTTAAAGGGTGCGTAGGCGGTACTATAAGTCAGTGGTGAAATACTACAGCTCAACTGTAGAGGTGCCATTGAAACTGTAATACTTGAGTACAGACGAGGTAGGCGGAATTTATGGTGTAGCGGTGAAATGCATAGATACCATAAAGAACACCGATAGCGAAGGCAGCTTACTAGACTGTAACTGACGCTGAG…
e7581647a1e99169075aeb665e226299	D_0__Bacteria;D_1__Proteobacteria;D_2__Gammaproteobacteria;D_3__Steroidobacterales;D_4__Woeseiaceae;D_5__Woeseia	TCGAGAGGCTTCGGCAATGGGGGAAACCCTGACCGAGCGACGCCGCGTGCGGGATGAAGGTCTTCGGATTGTAAACCGCTGTCAGGAGGGAAGAATCCCCGCTGGTTAATACCCAGCGGGTTGACGGTACCTACAGAAGAAGCTCCGGCTAACTCCGTGCCAGCAGCCGCGGTAATACGGAGGGAGCGAGCGTTAATCGGAATTACTGGGCGTAAAGCGCGCGTAGGCGGCTTTGTAAGTCGGATGTGAAAGCCCAGGGCTTAACCCTGGAATTGCATTCGATACTGCATGGCTAGAGTATGGTAGAGGGAAGTGGAATTTCCGGTGTAGCGGTGAAATGCGTAGATATCGGAAGGAACACCAGTGGCGAAGGCGACTTCCTGGGCCAATACTGACGCT…
9247c3c59cb410696a8c4af46de002f2	D_0__Bacteria;D_1__Proteobacteria;D_2__Alphaproteobacteria;D_3__Rhodovibrionales;D_4__Kiloniellaceae;D_5__uncultured;D_6__uncultured alpha proteobacterium	TGGGGAATATTGGACAATGGGCGCAAGCCTGATCCAGCCATGCCGCGTGAGTGAAGAAGGCCTTAGGGTTGTAAAACTCTTTCACCCGTGAAGATGATGACGGTAGCGGGAGAAGAAGCCCCGGCTAACTCCGTGCCAGCAGCCGCGGTAATACGGAGGGGGCGAGCGTTGTTCGGAATTACTGGGCGTAAAGGGCGCGTAGGCGGAGCAGCAAGTCAGAGGTGAAAGTCCTGGGCTCAACCTGGGGACTGCCTTTGAAACTGTTGTTCTAGAGACCGGGAGAGGATGGCGGAATTCCCAGTGTAGAGGTGAAATTCGTAGATATTGGGAAGAACACCAGTGGCGAAGGCGGCCATCTGGACCGGTACTGACGCTGAGGCGCGAAAGCGTGGGGAGCAA…
b08b36599b2e76ea9cfcdc715793bcc0	D_0__Bacteria;D_1__Acidobacteria;D_2__Subgroup 22;D_3__uncultured bacterium;D_4__uncultured bacterium;D_5__uncultured bacterium;D_6__uncultured bacterium	TGGGGAATTTTGCGCAATGGGCGAAAGCCTGACGCAGCAACGCCGCGTGGAGGATGAAGGCCCTCGGGTCGTAAACTCCTGTCAGTGGGGACGAATGCTTCGCAAGAAGTTTGACTGTACCCATTGAGGAAGCCACGGCTAACTCCGTGCCAGCAGCCGCGGTAATACGGAGGTGGCAAGCGTTGTTCGGAATTACTGGGCGTAAAGGGCGCGTAGGCGGCTTGGCAAGTCAGTTGTGAAAGCCCTCGGCTCAACCGGGGAACTGCGACTGATACTGCCAGGCTTGAGTCCCGGAGAGGGTAGCGGAATTCCCAGTGTAGCGGTGAAATGCGTAGATATTGGGAGGAACATCGGTGGCGAAGGCGGCTACCTGGACGGGTACTGACGCTGAGGCGCGAA…
d7e13d0ee2cb6c60e7206c391c4bb959	D_0__Bacteria;D_1__Patescibacteria;D_2__ABY1;D_3__Candidatus Kerfeldbacteria;D_4__uncultured bacterium;D_5__uncultured bacterium;D_6__uncultured bacterium	TCAAGAATCTTCCGCAATGCGCGAAAGCGTGACGGAGCGACGCCGCGTGATTGATGAAGCCCTTCGGGGTGTAAAGATCTTTTCTTAGGGAGGAACGTTGACAGTACCTAAGGAATAAGGGGCTGCCAAACTCGTGCCAGCAGCAGCGGTAATACGAGTGCCCCAAGCGTTACCCGGATTCACTGGGCGTAAAGCGTCCGCAGGCGGTTTGGAAAGTCACTGGTCAAATCTTAGGGCTCAACCCTGAGACTGCCAGTGAAACTGCCAGACTAGAGGCTGGGAGAGGTAAGCGGAATTGCCGGTGTAGCAGTAAAATGCGATAATATCGGTAGGAACACCAATTGCGAAGGCAGCTTACTGGAACAGTCCTGACGCTCAGGGACGAAAGCGTGGGTAGCG…
426f475c71fe10b435bcf1de6a85a826	D_0__Bacteria;D_1__Proteobacteria;D_2__Alphaproteobacteria;D_3__Rhodobacterales;D_4__Rhodobacteraceae;D_5__Loktanella;D_6__uncultured Rhodobacteraceae bacterium	TGGGGAATCTTAGACAATGGGCGCAAGCCTGATCTAGCGATGCCGCGTGAGTGACGAAGGCCTTAGGGTCGTAAAGCTCTTTCGCCAGGGATGATAATGACAGTACCTGGTAAAGAAACCCCGGCTAACTCCGTGCCAGCAGCCGCGGTAATACGGAGGGGGTTAGCGTTGTTCGGAATTACTGGGCGTAAAGCGCACGTAGGCGGATTAGAAAGCTAGAGGTGAAATCCCAGGGCTCAACCCTGGAACTGCCTTTAGAACTACTAGTCTAGAGTTCGAGAGAGGTGAGTGGAATTCCAAGTGTAGAGGTGAAATTCGTAGATATTTGGAGGAACACCAGTGGCGAAGGCGGCTCACTGGCTCGATACTGACGCTGAGGTGCGAAAGTGTGGGGAGCAA…
d9d545e253835a2df36ca635c6695d11	D_0__Bacteria;D_1__Cyanobacteria;D_2__Melainabacteria;D_3__Gastranaerophilales;D_4__uncultured organism;D_5__uncultured organism;D_6__uncultured organism	TAGGGAATTTTGCGCAATGGACGAAAGTCTGACGCAGCAATACCGCGTGAGGGATGAAGCTTTTCGGAGTGTAAACCTCTGTCAGTGGGGACGAAATCAATGACGGTACCCACAAAGGAAGCACCGGCTAACTCCGTGCCAGCAGCCGCGGTAAGACGGGGGGTGCAAGCGTTGTCCGGAATTATTGGGCGTAAAGCGTTCGTAGGCGGTCTGTCAAGTCTGATGTTAAAGCCCGGAGCTCAACTCCGGTTCGGCATTGGATACTGGCAAACTAGAGTACAGAAGAGGCAAGGGGAATTCCTGGTGTAGCGGTGAAATGCGTAGATATCAGGAGGAACACCGGTGGCGTAAGCGCCTTGCTGGGCTGTTACTGACGCTGAGGGACGAAAGCCAGGGTAG…
03fcb0792357103a7560d84c8463a430	D_0__Bacteria;D_1__Proteobacteria;D_2__Deltaproteobacteria;D_3__Myxococcales;D_4__Sandaracinaceae;D_5__uncultured	TAAGGAATATTGGTCAATGGACGCAAGTCTGAACCAGCCATGCCGCGTGCAGGAAGACGGCCTTATGGGTTGTAAACTGCTTTTATAAAGGAATAATACCCTGTACGTGTACAGGGTTGAAGGTACTTTAGGAATAAGCACCGGCTAACTCCGTGCCAGCAGCCGCGGTAAGACAGAGGGTGCAAACGTTGCTCGGAATTACTGGGCGTAAAGCGCGTGTAGGCGGACCGATAAGTCAGATGTGAAATCCCTGGGCTCAACCCAGGAACTGCATTTGAAACTGTCGGTCTTGAGTAATGGAGAGGAAAGCGGAATTCCCGGTGTAGAGGTGAAATTCGTAGATATCGGGAGGAACACCAGTGGCGAAGGCGGCTTTCTGGACATTTACTGACGCTGAGA…
322d283adb8dc1ff64a7ea8e88167030	D_0__Bacteria;D_1__Proteobacteria;D_2__Alphaproteobacteria	TGGGGAATATTGGACAATGGGGGAAACCCTGATCCAGCCATGCCGCGTGAGTGAAGAAGGCCCTAGGGTTGTAAAGCTCTTTCAGCTGTGAAGATGATGACGGTAGCAGCAGAAGAAGCCCCGGCTAACTCCGTGCCAGCAGCCGCGGTAATACGGAGGGGGCAAGCGTTGCTCGGAATTACTGGGCGTAAAGGGCGTGTAGGCGGACTAGCCAGTCAGGCGTGAAAGCCCCGGGCTTAACCTGGGAACTGCGTTTGATACTGTTGGTCTAGAGTTCGGGAGAGGATGGTGGAATTCCCAGTGTAGAGGTGAAATTCGTAGATATTGGGAAGAACACCGGTGGCGAAGGCGGCCATCTGGACCGATACTGACGCTGAGGCGCGAAAGCGTGGGGAGCAA…
cff919f66c86d45a7d378add4fbe65dd	D_0__Bacteria;D_1__Bacteroidetes;D_2__Bacteroidia;D_3__Flavobacteriales;D_4__Flavobacteriaceae	TGAGGAATATTGGACAATGGTCGAAAGACTGATCCAGCCATGCCGCGTGCAGGATGACGGCCTTATGGGTTGTAAACTGCTTTTCTGGAAGAAGAATAATATTGACGTGTCAATAGATGACGGTACTCCAGGAATAAGCATCGGCTAACTCCGTGCCAGCAGCCGCGGTAATACGGAGGATGCAAGCGTTATCCGGAATCATTGGGTTTAAAGGGTCCGTAGGCGGGCTGTTAAGTCAGTGGTGAAATACCCCGGCTCAACCGGGGAGGTGCCATTGATACTGACAGTCTTGAATGCATAAGAAGTAATTAGAATGTGTAGTGTAGCGGTGAAATGCATAGAGATTACACAGAATACCGATTGCGAAGGCAGATTACTATTATTGCATTGACGCTGATG…
78fe3cd6f85e2cd10b932386df161581	D_0__Bacteria;D_1__Proteobacteria;D_2__Gammaproteobacteria;D_3__Gammaproteobacteria Incertae Sedis;D_4__Unknown Family;D_5__uncultured;D_6__uncultured gamma proteobacterium Sva0318	TGGGGAATATTGCACAATGGGCGCAAGCCTGATGCAGCAATGCCGCGTGTGTGAAGAAGGCCTGCGGGTTGTAAAGCACTTTTATTAGGAAAGAAAAACCCGGAGCTAATACCTCCGGCATTGACGGTACCTAAAGAATAAGCACCGGCTAACTCAGTGCCAGCAGCCGCGGTAATACTGAGGGTGCAAGCGTTAATCGGAATTACTGGGCGTAAAGCGAGTGTAGGCGGTTTGTTAAGTCAGATGTGAAAGCCCGGGGCTCAACCCCGGAAGTGCATTTGAAACTGGCAGACTTGAGTATGGGAGAGGAAAGTGGAATTCCTGGTGTAGAGGTGAAATTCGTAGATATCAGGAGGAACACCGGTGGCGAAGGCGACTTTCTGGACCAATACTGACGCT…
b66d9c3e6593eb541aad336434d5238f	D_0__Bacteria;D_1__Proteobacteria;D_2__Gammaproteobacteria;D_3__B2M28;D_4__uncultured bacterium;D_5__uncultured bacterium;D_6__uncultured bacterium	TGGGGAATATTGGACAATGGGCGAAAGCCTGATCCAGCAATGCCGCGTGTGTGAAGAAGGCCTGCGGGTTGTAAAGCACTTTCAGTGGGGAGGATAATGACGTTACCCACAGAAGAAGCACCGGCTAACTCTGTGCCAGCAGCCGCGGTAATACAGAGGGTGCGAGCGTTAATCGGAATTACTGGGCGTAAAGCGCGCGTAGGCGGCTTGGTCAGTCGGATGTGAAAGCCCCGGGCTTAACCTGGGAACTGCATTCGATACTGCCGAACTAGAGTCTGGGAGAGGGAAGTGGAATTTCCGGTGTAGCGGTGAAATGCGTAGATATCGGAAGGAACACCAGTGGCGAAGGCGACTTCCTGGCCCAAGACTGACGCTGAGGTGCGAAAGCGTGGGGAGCAA…
de1ee81a7846ccadee18869921490795	D_0__Bacteria;D_1__Proteobacteria;D_2__Gammaproteobacteria;D_3__Gammaproteobacteria Incertae Sedis;D_4__Unknown Family;D_5__uncultured;D_6__uncultured bacterium	TGGGGAATATTGCACAATGGGCGCAAGCCTGATGCAGCAATGCCGCGTGTGTGAAGAAGGCCTGCGGGTTGTAAAGCACTTTTATCGGGAAAGAAAAACCCAAGGTTAATAGCCTTGGCATTGACGGTACCCGTTGAATAAGCACCGGCTAACTCCGTGCCAGCAGCCGCGGTAATACGGAGGGTGCAAGCGTTAATCGGAATTACTGGGCGTAAAGCGAGTGTAGGCGGCTTCGTAAGTCGGATGTGAAAGCCCCGGGCTTAACCTGGGAATGGCATTCGATACTGCGCGGCTAGAGTCTGATAGAGGGAAGTGGAATTCCAGGTGTAGCGGTGAAATGCGTAGAGATCTGGAGGAACACCAGTGGCGAAGGCGGCTTCCTGGATCAAGACTGACGCT…
61ca346c10aeaad614dcd0c3eeab491d	D_0__Bacteria;D_1__WS2;D_2__uncultured bacterium;D_3__uncultured bacterium;D_4__uncultured bacterium;D_5__uncultured bacterium;D_6__uncultured bacterium	TTCAGAATCTTGCACAATGGACGAAAGTCTGATGCAGCCATGCCGCGTGTGCGAAGAAGGCCCTCGGGTCGTAAAGCACTGTCAGGAGGGAAGAAATTGACGGTACCTCCAGAGGAAGCCACGGCTAATTACGTGCCAGCAGCCGCGGTAATACGTAAGTGGCGAGCGTTATCCGGAATTACTGGGCGTAAAGCGTTCGTAGGCGGCGTTGTAAGTTGGATTTGAAATATCGGGGCTCAACCCCGGAACCGGGTCCAAAACTGCAGTGCTAGAGCAAATCAGAGGGTAGTGGAATTCCCGGTGTAGCGGTAATATGCGTAGAGATCGGGAGGAACACCAGTGGCGAAGGCGGCTACCTGGGGTTTTGCTGACGCTGAGGAACGAAAGCTAGGGTAGCGA…
a3e7c149c1f7de28fea59e65cb77c1a0	D_0__Bacteria;D_1__Proteobacteria;D_2__Deltaproteobacteria;D_3__Myxococcales;D_4__Blfdi19;D_5__uncultured bacterium;D_6__uncultured bacterium	TGGGGAATATTGGTCAATGGGCGAAAGCCTGAACCAGCAATGCCGCGTGAGTGATGAAGGCCCTCGGGTTGTAAAGCTCTGTCAGTGGGAACGAATAAGTCGGTTAATACCCGGTGATGACGGTACCCACAAAGGAAGCACCGGCTAACTCTGTGCCAGCAGCCGCGGTAATACAGAGGGTGCAAGCGTTGTTCGGAATTACTGGGCGTAAAGCGCGTGTAGGCGGTCCGTTTAGTCGGATGTGAAAGCCCGTGGCTCAACCACGGAAGTGCATCCGATACTGGCGGACTTGAGTACTGGAGGGGGTGGCGGAATTCCCGGTGTAGAGGTGAAATTCGTAGATATCGGGAGGAACACCTGCGGCGAAGGCGGCCACCTGGACAGATACTGACGCTGAGA…
ab8b775e7fb03c35d7cb0c19af21173b	D_0__Bacteria;D_1__Chloroflexi;D_2__Anaerolineae;D_3__SBR1031;D_4__metagenome;D_5__metagenome;D_6__metagenome	TGAGGAATCTTGCGCAATGGGGGAAACCCTGACGCAGCGACACCGCGTGCGGGAGGAAGGCTTTCGGGTCGTAAACCGCTTTTCTGGAGGACGAGGAAGGACGGTACTCCAGGAATAAGTCCCGGCTAACTACGTGCCAGCAGCCGCGGTAAAACGTAGGGGGCGAGCGTTATCCGGAATTACTGGGCGTAAAGGGCGTCTAGGCGGCAGCCTAAGTCTTATGTGAAAGCTCCCGGCTCAACTGGGAGAGGGCATGGGAAACTGGGCAGCTAGAGACTCAGAGGGGGGTGTGGAATTCCCGGTGGAGTGGTGAAATGCGTTGAGATCGGGAGGAACACCAGTAGCGAAGGCGGCACCCTGGCTGAGATCTGACGCTGAAGCGCGACAGCGTGGGGAGCG…
46f38b729262837561ba91bedd681500	D_0__Bacteria;D_1__Planctomycetes;D_2__OM190;D_3__uncultured bacterium;D_4__uncultured bacterium;D_5__uncultured bacterium;D_6__uncultured bacterium	TCGAGAATCTTCCGCAATGGGCGAAAGCCTGACGGAGCGACGCCGCGTGGAGGACGAAGGCCTTCGGGTTGTAAACTCCTGTCACGGGTCATGAATGTGTACGCGTTAATAGCGCGTGCATTGACGTAAGCCCGAAAGGAAGCACCGGCTAACTCCGTGCCAGCAGCCGCGGCAATACGGAGGGTGCGAACGTTGTTCGGAATTACTGGGCATAAAGAGCTCGTAGGCGGCTGTGCAAGTGTGGAGTGAAATCCCACGGCTTACCCGTGGAACTGCTTTGCAGACTGCACGGCTAGAGGATGGTAGGGGAGAGCGGAACTCCTGGTGGAGCGGTGAAATGCGTAGATATCAGGAGGAACACCGGTGGCGAAGGCGGCTCTCTGGTCCATCCCTGACGCT…
56029b1b67c237d4f6c6cc0be76e9cd5	D_0__Bacteria;D_1__Proteobacteria;D_2__Alphaproteobacteria;D_3__Rhizobiales;D_4__Methyloligellaceae;D_5__uncultured;D_6__uncultured bacterium	TGGGGAATATTGCACAATGGGCGCAAGCCTGATGCAGCCATGCCGCGTGAGTGAATAAGGCCTTAGGGTTGTAAAACTCTTTCACCGGTGAAGATAATGACGGTAACCGGAGAAGAAGCCCCGGCTAACTCCGTGCCAGCAGCCGCGGTAATACGGAGGGGACTAGCGTTGTTCGGAATCACTGGGCGTAAAGCGCACGTAGGCTGACCGGTCAGTTGAGGGTGAAATCCCAAGGCTCAACCTTGGAACTGCCCTCAATACTACCAGTCTCGAGTCCGGGAGAGGTGAGTGGAATTCCTAGTGTAGAGGTGAAATTCGTAGATATTAGGAAGAACACCAGTGGCGAAGGCGGCTCACTGGCCCGGTACTGACGCTGAGGTGCGAAAGCGTGGGGAGCAA…
eabb4bb142ef8f469a0d9f9e4adff167	D_0__Bacteria;D_1__Proteobacteria;D_2__Deltaproteobacteria;D_3__Desulfobacterales;D_4__Desulfobulbaceae;D_5__uncultured	CAACGAATATTCCGCAATGGGCGCAAGCCTGACGGAGCGACGCCGCGTGCAGGATGAAGTCCTTCGGGATGTAAACTGCTGTCAGGGGTCAGAAAGAAAGTGATCAACCCCAAAGGAAGCATCGGCTAACTCCGTGCCAGCAGCCGCGGTAATACGGAGGATGCGAGCGTTGTTCGGAATTACTGGGCGTAAAGCGCGCGTAGGCGGCTATGTAAGTCAGATGTGAAAGCCCGCGGCTCAACCGTGGAAGTGCATTTGAAACTGTATAGCTTGAGTACTGGAGGGGGTAGTGGAATTCCCGGTGTAGAGGTGAAATTCGTAGATATCGGGAGGAATACCGGTGGCGAAGGCGACTACCTGGCCAGATACTGACGCTGAGGTGCGAAAGCGTGGGGAGCA…
f6e397d9e238ec2ccbed413c2d29ff66	D_0__Bacteria;D_1__Proteobacteria;D_2__Alphaproteobacteria;D_3__Rhodobacterales;D_4__Rhodobacteraceae;D_5__uncultured;D_6__uncultured bacterium	TGGGGAATCTTAGACAATGGGGGCAACCCTGATCTAGCCATGCCGCGTGAGTGAAGAAGGCCTTAGGGTCGTAAAGCTCTTTCAGCTGGGAAGATAATGACGGTACCAGCAGAAGAAGCCCCGGCTAACTCCGTGCCAGCAGCCGCGGTAATACGGAGGGGGCTAGCGTTGTTCGGAATTACTGGGCGTAAAGCGCGCGTAGGCGGGCTGTTAAGTCGGGGGTGAAATCCCGGGGCTCAACCCCGGAACTGCCTCCGATACTGGCAGCCTAGAGATCGAGAGAGGTGAGTGGAATTCCGAGTGTAGAGGTGAAATTCGTAGATATTCGGAGGAACACCAGTGGCGAAGGCGGCTCACTGGCTCGATACTGACGCTGAGGCGCGAAAGCGTGGGGAGCAA…
7f50a2ef1b8a9e8584f8d0665ddad0cc	D_0__Bacteria;D_1__Epsilonbacteraeota;D_2__Campylobacteria;D_3__Campylobacterales;D_4__Sulfurovaceae;D_5__Sulfurovum	TAGGGAATCTTCCACAATGGGCGAGAGCCTGATGGAGCAACGCCGCGTGCAGGATGAATGCCTTCGGGTTGTAAACTCCTTTTATATGGGAAGATAATGACGGTACCATATGAATAAGCACCGGCTAACTCCGTGCCAGCAGCCGCGGTAATACGGAGGGTGCAAGCGTTACTCGGAATCACTGGGCGTAAAGCGCGCGCAGGCGGCCTTTTAAGTTGGATGTGAAAGCCTATGGCTCAACCATAGAACTGCATCCAAAACTATCAGGCTAGAGTGTGGGAGAGGAAGATGGAATTAGTTGTGTAGGGGTAAAATCCGTAGAGATAACTAGGAATACCAAAAGCGAAGGCAATCTTCTGGAACATTACTGACGCTGAGGCGCGAAAGCGTGGGGAGCAA…
eb34d8b5094fc31cc7ed761f88ab94d1	D_0__Bacteria;D_1__Bacteroidetes;D_2__Bacteroidia;D_3__Flavobacteriales;D_4__Flavobacteriaceae;D_5__Lutimonas	TGGGGAATATTGCACAATGGGCGAAAGCCTGATGCAGCAACGCCGTGTGAGCGATGAAGGCCTTCGGGTCGTAAAGCTCTGTCTTGAAGGAAGAAAAAAATGACGGTACTTCAAGAGGAAGCCCCGGCTAACTCCGTGCCAGCAGCCGCGGTAATACGGAGGGTCCAAGCGTTATCCGGAATCATTGGGTTTAAAGGGTCCGTAGGCGGGCAATTAAGTCAGAGGTGAAATCCCACAGCTCAACTGTGGAACTGCCTTTGATACTGGTTGTCTTGAGTTATAGTGAAGTAGATAGAATATGTAGTGTAGCGGTGAAATGCATAGATATTACATAGAATACCGATTGCGAAGGCAGTCTACTAACTGTATACTGACGCTAATGGACGAAAGCGTGGGGAG…
dc99677e3d167f39271afb41204ed4c7	D_0__Bacteria;D_1__Bacteroidetes;D_2__Rhodothermia;D_3__Rhodothermales;D_4__Rhodothermaceae;D_5__uncultured;D_6__uncultured deep-sea bacterium	TGAGGAATATTGGGCAATGGACGAAAGTCTGACCCAGCCACGCCGCGTGCAGGATGACACCCCTATGGGGCGTAAACTGCTTTTATATGGGAAGAACCCTTCCGATTCGTCGGGAGCTGACGGTACCATACGAATAAGGACCGGCTAACTCCGTGCCAGCAGCCGCGGTAATACGGAGGGTCCAAGCGTTGTCCGGATTTATTGGGTGTAAAGGGTGTGTAGGCGGGCTTGTAAGTCAGAGGTGAAATCCTACGGCTCAACCGTAGAACTGCCTTTGATACTGCAGGTCTTGAGTCCTGGAGAGGTTGTTAGAATTCGTGGTGTAGCGGTGAAATGCGTAGATATCACGAGGAATACCGGTTACGAAGGTTGACAACTGGACAGGTACTGACGCTGAGG…
8e5db2b4e4ebe9709a95d1bfb88e8939	D_0__Bacteria;D_1__Proteobacteria;D_2__Deltaproteobacteria;D_3__Desulfuromonadales;D_4__Sva1033;D_5__Pelobacter sp. A3b3;D_6__Pelobacter sp. A3b3	CAGGGAATATTGCACAATGGGCGAAAGCCTGATGCAGCGACACCGCGTGCGGGATGACGGCCTTAGGGTTGTAAACCGCTTTCAGGAGGGAAGAAAATGGCGGTACCCTCAGAGGAAGCACCGGCTAACTCCGTGCCAGCAGCCGCGGTAATACGGAGGGTGCAAACGTTGTTCGGAATTGTTGGGCGTAAAGAGCATGTAGGCGGTCTGTCAAGTCTGATGTGAAAGCCCGGGGCTCAACCCCGGAAGTGCATTGGAAACTGGCAGACTTGAGTACGGGAGAGGAAAGTGGAATTTCGAGTGTAGGGGTGAAATCCGTAGATATTCGAAGGAACACCAGTGGCGAAGGCGGCTTTCTGGACCGATACTGACGCTGAGATGCGAAAGCGTGGGGAGCAA…
e2d87ab56bf0520a0899d2837643c4e6	D_0__Bacteria;D_1__Dependentiae;D_2__Babeliae;D_3__Babeliales;D_4__Vermiphilaceae;D_5__uncultured bacterium;D_6__uncultured bacterium	TGAGGAATATTGCGCAATGGACGAAAGTCTGACGCAGCGACGCCGCGTGGGGGATGAAGGTCTTTGGATTGTAAACTCCTGTTAAGTGGGAAGAAATACTAGTTTACTAGGGATGACGGTACCACTAAAGAAAGCACCGGCTAACTTCGTGCCAGCAGCCGCGGTAATACGAGGGGTGCAAACGTTATTCGGAATTACTGGGCGTAAAGAGTACGTAGACGGTTTATCAAGCTCGTTGTTAAATTTTCCGGCCTAACCGGAAGCAAGCAGCGGGAACTGGTTCACTAGAGGGTGAAAGAGAGAAGTGGAATTCCCGGAGTAGCGGTAAAATGCGTAGATCTCGGGAGGAACACCAATGGCGAAGGCAGCTTCTTGGTTCACATCTGACGTTGAGGTACG…
13346893325dee48c4f5874def001900	D_0__Bacteria;D_1__Acidobacteria;D_2__Subgroup 22;D_3__uncultured bacterium;D_4__uncultured bacterium;D_5__uncultured bacterium;D_6__uncultured bacterium	TAGGGAATCTTGCGCAATGGGCGAAAGCCTGACGCAGCGACGCCGCGTGAGCGATGAAGGCCTTCGGGTTGTAAAGCTCTGTGGAGAATGAAGAATAAGCGTAAGTTAATAGCTTGCGTGATGACGGTATTTCTTTAGCAAGCACCGGCTAACTCTGTGCCAGCAGCCGCGGTAAGACAGAGGGTGCAAACGTTGTTCGGAATCACTGGGCGTAAAGGGCGCGTAGGCGGCTGCGCAAGTCGAACGTGAAATCCCTCGGCTCAACCGGGGAACTGCGTCCGATACTGCGTGGCTTGAGTCCCGGAGAGGGTAGCGGAATTCCCAGTGTAGCGGTGAAATGCGTAGATATTGGGAGGAACACCAGTGGCGAAGGCGGCTACCTGGACGGGTACTGACGCT…
adeae3da87e79849371d92744b0ebbda	D_0__Bacteria;D_1__Proteobacteria;D_2__Deltaproteobacteria;D_3__SAR324 clade(Marine group B)	TGGGGAATTTTGCGCAATGGGCGGAAGCCTGACGCAGCAATACCGCGTGAGTGAAGAAGGCCTTTGGGTCGTAAAGCTCTTTTCTAAGGGAAGATAGTGACGGTACCTTAGGAATAAGCACCGGCTAACTCCGTGCCAGCAGCCGCGGTAATACGGAGGGTGCGAGCGTTGTTCGGATTTACTGGGCGTAAAGGGCACGTAGGCGGCATAGCAAGTTAAGGGTGAAATCCCGGGGCTCAACTCCGGAACTGCTCTTGAAACTGCTAAGCTAGAGATAGTCAGAGGTAGGTGGAATTCCAGGTGTAGCGGTGAAATGCGTAAATATCTGGAGGAACACCGGTGGCGAAGGCGGCCTACTGGCCCGGAACTGACGCTCAGGCACGAAAGCTAGGGGAGCGA…
aad6abd6ed91bdddecead1dbff9e2d4b	D_0__Bacteria;D_1__Bacteroidetes;D_2__Ignavibacteria;D_3__Ignavibacteriales;D_4__Melioribacteraceae;D_5__IheB3-7;D_6__uncultured Chlorobi bacterium	TGAGGAATATTGGGCAATGGGCGAAAGCCTGACCCAGCAACGCCGCGTGGAGGATGAATGTCGTAAGATTGTAAACTCCTTTTAGAGGGGACGAAAAAACAGGTTAGAAGCCTGAATTGACGGTACCCTCAGAATAAGCCCCGGCTAACTACGTGCCAGCAGCCGCGGTAATACGTAGGGGGCAAGCGTTGTCCGGATTTACTGGGTGTAAAGGGCGCGCAGGCGGGTTGGCAAGTCAGAGGTGAAATCCTACAGCTTAACTGTAGAACTGCCCTTGATACTGCCGATCTTGAGTATGGAAGAGAGAGACGGAATTCCAGGTGTAGTGGTGAAATACGTAGATATCTGGAAGAACACCAGTTGCGAAGGCGGTCTCTTGGTCCAATACTGACGCTGAGG…
53c38290ebddd4333052481c9d7053dc	D_0__Bacteria;D_1__Proteobacteria;D_2__Gammaproteobacteria;D_3__Gammaproteobacteria Incertae Sedis;D_4__Unknown Family;D_5__uncultured;D_6__uncultured gamma proteobacterium	TGGGGAATATTGCACAATGGGCGCAAGCCTGATGCAGCAATGCCGCGTGTGTGAAGAAGGCCTGCGGGTTGTAAAGCACTTTTATCAAGAAAGAAAAACCCAAGACTAATACTCTTGGCATTGACGGTACTTGAGGAATAAGCACCGGCTAACTCCGTGCCAGCAGCCGCGGTAATACGGAGGGTGCAAGCGTTAATCGGAATTACTGGGCGTAAAGCGAGTGTAGGCGGCAATGTAAGTCGGATGTGAAAGCCCTGGGCTCAACCTGGGAATTGCATTCGATACTGCATAGCTTGAATCAGACAGAGGGATGTGGAATTCCGGGTGTAGCGGTGAAATGCGTAGATATCCGGAGGAACACCAGTGGCGAAGGCGGCATCCTGGGTCTAGATTGACGCT…
758e98b5dc3b1295ab00ad964a4abdad	D_0__Bacteria;D_1__Proteobacteria;D_2__Alphaproteobacteria;D_3__Parvibaculales;D_4__PS1 clade;D_5__uncultured bacterium;D_6__uncultured bacterium	TGGGGAATATTGCACAATGGGCGCAAGCCTGATGCAGCCATGCCGCGTGAGTGATGAAGGCCTTAGGGTTGTAAAGCTCTTTCACCGGTGAAGATAATGACGGTAGCCGGAGAAGAAGCCCCGGCTAACTCCGTGCCAGCAGCCGCGGTAATACGGAGGGGGCTAGCGTTGTTCGGAATTACTGGGCGTAAAGCGCGCGTAGGCGGGCTAGTAAGTTGGGGGTGAAATCCCGAGGCTTAACCTCGGAACTGCCTCCAAAACTGCTAGTCTTGAGATCGAGAGAGGTAAGTGGAATTCCTAGTGTAGAGGTGAAATTCGTAGATATTAGGAAGAACACCAGTGGCGAAGGCGGCTTACTGGCTCGATACTGACGCTGAGGCGCGAAAGCGTGGGGAGCAA…
cef4b5379c984a518e70a140ad8cab9a	D_0__Bacteria;D_1__Bacteroidetes;D_2__Bacteroidia;D_3__Bacteroidetes VC2.1 Bac22;D_4__uncultured organism;D_5__uncultured organism;D_6__uncultured organism	TGAGGAATATTGGTCAATGGACGCAAGTCTGAACCAGCCATGCCGCGTGCAGGATGACGGCCCTATGGGTTGTAAACTGCTTTTATTAAGGAATAAACCCTCCTACGTGTAGGAGGCTGAACGTACTTAAAGAATAAGCATCGGCTAACTCCGTGCCAGCAGCCGCGGTAATACGGAGGATGCAAGCGTTATCCGGATTCATTGGGTTTAAAGGGTTCGCAGGCGGCGTATTAAGTCAGTGGTGAAATCTCTCGGCTCAACCGAGAAACTGCCATTGATACTGGTATGCTAGAGTATAGTTGGCGTAGGCGGAATGTATCATGTAGCGGTGAAATGCTTAGATATGATACAGAACACCGATCGCGAAGGCAGCTTACGAAACTATAACTGACGCTCAGG…
f11965a73c389fb3af556d46446549e6	D_0__Bacteria;D_1__Chloroflexi;D_2__Anaerolineae;D_3__Caldilineales;D_4__Caldilineaceae;D_5__uncultured;D_6__uncultured bacterium	TGAGGAATATTGCACAATGGGGGGAACCCTGATGCAGCAACGTCGCGTGGAGGATGAAGGTCTTTGGATTGTAAACTCCTTTTCTCGGGGAAGAGAGAGGACGGTACTCGAGGAATAAGTCACGGCTAACTACGTGCCAGCAGCCGCGGTAATACGTAGGTGGCGAGCGTTATCCGGAATTACTGGGCGTAAAGGGCACGCAGGCGGCTTGTCAAGTTTGACGTGAAAGCTCCTGGCTTAACTGGGAGAGGTCGTTGGAAACTGATAGGCTTGAGTGCAGGAGAGGCAAGTGGAATTCCTAGTGTAGAGGTGAAATTCGTAGATATTAGGGGGAACACCAGTGGCGAAGGCGACTTGCTGGACTGTAACTGACGCTGAGGTACGAAAGCGTGGGGAGCG…
e62c81c20153b6da8029c6ab25bb0b21	D_0__Bacteria;D_1__Patescibacteria;D_2__Parcubacteria;D_3__Candidatus Moranbacteria;D_4__uncultured bacterium;D_5__uncultured bacterium;D_6__uncultured bacterium	TCGAGAATGTTCCACAATGGGCGAAAGCCTGATGGAGCGACGCCGCGTGCGGGATGAATGCCTTCGGGTTGTAAACCGCTTTTGTGAAGGATGAACTTCGGTGACAGTACTTCACGAATAAGAGGTTGCTAACTCCGTGCCAGCAGCAGCGGTAATACGGAGACCTCAAGCGTTATCCGGATTTATTGGGCGTAAAGGGTGTGTAGGCGGCTTAAATAGTCAGATGTTAAATCACTGAGCTCAACTCAGTGGCCGCATTTGAAACGTTTAAGCTAGAGACAGGTAGAGGCAAGTGGAACTCATGGTGTAGCAGTGAAATGCGTTGATATCATGGGGAACACCAAAGGCGAAGGCAGCTTGCTGGGCCTTGTCTGACGCTGAGACACGAAAGCGTGGGTA…
1e284327aed4cc93d38ab68d6532d21d	D_0__Bacteria;D_1__Bacteroidetes;D_2__Bacteroidia;D_3__Sphingobacteriales;D_4__Lentimicrobiaceae;D_5__uncultured bacterium;D_6__uncultured bacterium	TAAGGAATATTGGTCAATGGACGCAAGTCTGAACCAGCCATGCCGCGTGCAGGATGAAAGCCCTATGGGTTGTAAACTGCTTTTATAAGGGAAGAATCCCCCCGACGTGTCGGGGGTTGACGGTACCTTTTGAATAAGCACCGGCTAACTCCGTGCCAGCAGCCGCGGTAATACGGAGGGTGCAAGCGTTATCCGGATTTATTGGGTTTAAAGGGTGCGCAGGCGGAATATTAAGTCAGTGGTGAAATCCTACAGCTCAACTGTAGAACTGCCATTGATACTGATATTCTTGAGTATAGTTGTAGTGGGCGGAATATGTCATGTAGCGGTGAAATGCTTAGATATGACATAGAACACCGATCGCGAAGGCAGCTCACTAAGCTATAACTGACGCTCAGG…
35a81f6069f3087b58e4e59cf45087ba	D_0__Bacteria;D_1__Proteobacteria;D_2__Alphaproteobacteria;D_3__Kordiimonadales;D_4__uncultured;D_5__uncultured bacterium;D_6__uncultured bacterium	TGGGGAATATTGTACAATGGACGCAAGTCTGATACAGCAATGCCGCGTGAGTGAAGAAGGCCTTAGGGTTGTAAAACTCTTTCGCCAGGGAAGATAATGACGGTACCTGGTAAAGAAGTCCCGGCTAACTCCGTGCCAGCAGCCGCGGTAATACGGAGGGGACTAGCGTTGTTCGGAATTACTGGGCGTAAAGAGTTCGTAGGCGGATAAGCAAGTAAGAGGTGAAAGCCCAGGGCTCAACCCTGGAACTGCCTTTTAAACTGCTTATCTAGAGACCGATAGAGGTTAGGGGAATACCTAGTGTAGAGGTGAAATTCGTAGATATTAGGTGGAACACCAGTGGCGAAGGCGCCTAACTGGATCGGTACTGACGCTGAGGAACGAAAGCGTGGGGAGCAA…
0679e5878f9bc195a2808b6a6355d6ba	D_0__Bacteria;D_1__Bacteroidetes;D_2__Bacteroidia;D_3__Flavobacteriales;D_4__Flavobacteriaceae;D_5__Lutibacter;D_6__uncultured bacterium	TGAGGAATATTGGGCAATGGACGAAAGTCTGACCCAGCCATGCCGCGTGCAGGAAGACGGCCCTATGGGTTGTAAACTGCTTTTATATAGGAAGAAACCTTTCCACGTGTGGAGAGCTGACGGTACTATATGAATAAGCACCGGCTAACTCCGTGCCAGCAGCCGCGGTAATACGGAGGGTGCAAGCGTTATCCGGAATCATTGGGTTTAAAGGGTCCGTAGGCGGATTAATAAGTCAGAGGTGAAATCCCACAGCTTAACTGTGGAACTGCCTTTGATACTGTTAGTCTTGAGTTATATGGAAGTAGATAGAATGTGTAGTGTAGCGGTGAAATGCATAGATATTACACAGAATACCGATTGCGAAGGCAGTCTACTACGTATATACTGACGCTAATG…
054c43b62529aed403751e28bdd2d98f	D_0__Bacteria;D_1__Actinobacteria;D_2__Coriobacteriia;D_3__OPB41;D_4__uncultured bacterium;D_5__uncultured bacterium;D_6__uncultured bacterium	TGGGGAATTTTGCGCAATGGGCGAAAGCCTGACGCAGCAACGCCGCGTGCGGGATGACGGCCTTAGGGTTGTAAACCGCTTTCAGCAGGGATGAGAATGACAGTACCTGCAGAAGAAGCCCCGGCTAAATACGTGCCAGCAGCCGCGGTAATACGTATGGGGCAAGCGTTATCCGGATTTATTGGGCGTAAAGGGCGCGTAGGCGGCTTGTTAAGTCAGGTGTGAAAACCGGGGGCTCAACCCGCGGCGTGCATCTGAAACTGACAGGCTTGAGTCTGGTAGAGGAAAGTGGAATTCCTAGTGTAGCGGTGAAATGCGCAGATATTAGGAGGAACACCAGTGGCGAAGGCGGCTTTCTGGGCCACGACTGACGCTGAGGCGCGAAAGCTAGGGGAGCAA…
3f504393c13050e5e6cf047422cc62f5	D_0__Bacteria;D_1__Patescibacteria;D_2__Gracilibacteria	TGAGGAATCTTCCGCAATGGGCGAAAGCCTGACGGAGCAACACCGCGTGGAGGATGACAGCGTTTTCGTTGTAAACTCCTTTTCTGAGGGAAGAATTCTGACGGTACCTCAGGAATAAGCATCGGCTAACTACGTGCCAGCAGCCGCGGTAAGACGTAGGATGCAAGCGTTATCCGGAATTATTGGGCGTAAAGAGTTCGTAGGCGGTTAATTAAGTTGGATGTTAAAGCTCTGAGCTCAACTCAGACACGGTGTCCAAAACTGGTTAACTAGAGACAGGTAGAGGCAAGTGGAATTCTGCATGTAGGGGTAATATCCGTAGATATGCAGAGGAACACCAAAAGCGAAGGCAGCTTGCTGGACCTGTTCTGACGCTCAAGAACGAAAGCGTGGGGAGCG…
395a768b2ee5746aee2f6c1b73ec610a	D_0__Bacteria;D_1__Proteobacteria;D_2__Deltaproteobacteria;D_3__Bdellovibrionales;D_4__Bdellovibrionaceae;D_5__Bdellovibrio;D_6__uncultured bacterium	TAGGGAATATTGCGCAATGGGGGAAACCCTGACGCAGCAACGCCGCGTGAGTGATGAAGGCTCTAGGGTCGTAAAGCTCTGTCGTAAGAGAAGAAAACAATGACGGTATCTTACAAGAAAGGACCGGCTAACTTCGTGCCAGCAGCCGCGGTAAGACGAGGGGTCCTAGCGTTGTTCGGAATCATTGGGCGTAAAGCGCATGCAGGCGGTCTAATCAGTCAGATGTGAAATCCCTGGGCTTAACCCAGGACGTGCATTTGATACTATTAGACTTGAGTACTGGAGAGGGTAGCGGAATTCCTGGTGTAGTGGTGAAATACGTAGATATCAGGAGGAACATCGGCGGCGAAGGCGGCTGCCTGGCCAAGTACTGACGCTCAGATGCGAAAGCGTGGGGAG…
7f0fdd6e577efc30e77e87559b8812c0	D_0__Bacteria;D_1__Bacteroidetes;D_2__Ignavibacteria;D_3__Ignavibacteriales;D_4__PHOS-HE36	TGAGGAATATTGGGCAATGGGCGAAAGCCTGACCCAGCAACGCCGCGTGGAGGATGAATGTCGTAAGATTGTAAACTCCTGTTAGAGGGGAAGAATAATTCCGATCGAATCGGAACTTGACTGTACCCTCAGAGAAAGCTCCGGCTAACTACGTGCCAGCAGCCGCGGTAATACGTAGGGAGCAAGCGTTGTCCGGATTTACTGGGTGTAAAGGGCGCGCAGGCGGGTTGGCAAGTCAGAGGTGAAATCCTACAGCTTAACTGTAGAACTGCCCTTGATACTGCCGATCTTGAGTATGGAAGAGAGAGACGGAATTCCAGGTGTAGTGGTGAAATACGTAGATATCTGGAAGAACACCAGTTGCGAAGGCGGTCTCTTGGTCCAATACTGACGCTGAGG…
2dead5d2cd5f334bdfe1ad2b109bd357	D_0__Bacteria;D_1__Proteobacteria;D_2__Gammaproteobacteria;D_3__Gammaproteobacteria Incertae Sedis;D_4__Unknown Family;D_5__uncultured;D_6__uncultured bacterium	TGGGGAATATTGCACAATGGGCGCAAGCCTGATGCAGCAATGCCGCGTGTGTGAAGAAGGCCTGCGGGTTGTAAAGCACTTTTATTAGGAAAGAAAAACCCGGAGTTAATACCTCCGGCATTGACGGTACCTAAAGAATAAGCACCGGCTAACTCAGTGCCAGCAGCCGCGGTAATACTGAGGGTGCAAGCGTTAATCGGAATTACTGGGCGTAAAGCGAGTGTAGGCGGCTACGTAAGTCGGATGTGAAAGCCCCGGGCTTAACCTGGGAATGGCATTCGATACTGCGTGGCTAGAGTCTGATAGAGGGAAGTGGAATTCCAGGTGTAGCGGTGAAATGCGTAGATATCTGGAGGAACATCAGTGGCGAAGGCGGCTTCCTGGATCAAGACTGACGCT…
f0eb13e384855e6960efd4f6fe93b866	D_0__Archaea;D_1__Nanoarchaeaeota;D_2__Woesearchaeia	TTAGGAATAATTTACAATGCGCGAAAGCGTGATAATTTGAGTCAGAGTGCGTTTCAATTTGAAATGCTTTTGTGAAATCTAAAACGTTTCACGAATAAGGACTGGGTAAGACGAGTGCCAGCCGCCGCGGTAATACTCGCGGCCCAAGTCGCAACCATTTTTATTGGGTCTAAAACATCCGTAGCTTGCTAAGTAAGTTCCTTGTGAAATTCTATATCTTAAATATGGGGCGGGCAGGGAATACTGTTTAGCTAGAGACTGGAAGACGTAAAGAGTACGTTTAAAGTAGCGGTAAAATGTGTTAATCTTAAACGGACTTACAATAGCGAAGGCACTTTACGAGGACAGTTCTGACAGTAAGGGATGAAGGCTAGGGGCGCAAAAC
87daab7f84081ed0b4acc64470a5a583	D_0__Bacteria;D_1__Planctomycetes;D_2__Phycisphaerae;D_3__Phycisphaerales;D_4__Phycisphaeraceae;D_5__SM1A02;D_6__uncultured bacterium	TAACGAATATTCCGCAATGGGCGAAAGCCTGACGGAGCAATGCCGCGTGTAGGATGAAGCGCCTTCGGTGTGTAAACTACTGTCAGAATCTAGGAACACTGACCAGATTCAAAGGAAGGACCGGCTAATTCCGTGCCAGCAGCCGCGGTAATACGGAAGGTCCAAGCGTTAATCGGAATTACTGGGCTTAAAGCGTGCGCAGGCGGACTAGTAAGCGTCTTGTGAAATCCCTCGGCTCAACCGGGGAACTGCAGGGCGAACTACTAGTCTTGAGTCAGGTAGGGGCCGACAGAACTATCGGTGGAGCGGTGAAATGCGTAGATATCGATGGGAATGCCAGTGGCGAAGGCGGTCGGCTGGGCCTGTACTGACGCTCATGCACGAAAGCGTGGGGAGCGA…
272fc1dcb57cbaf51795e4a0b1322e7d	D_0__Archaea;D_1__Euryarchaeota;D_2__Thermoplasmata;D_3__uncultured;D_4__uncultured eukaryote;D_5__uncultured eukaryote;D_6__uncultured eukaryote	GTGCGAAAACTTCGCAATGTGGGAAACCACGACGAGGGGAGTCCAAGTGCTTGCACAATGTGTAGGCTGTTTCCGTGCCTAAAAAGCACGGAGAGTAAGGGCTGGGTAAGACGGGTGCCAGCCGCCGCGGTAATACCCGCAGCCCGAGTGGTGGTCGCTATTATTGGGCCTAAAACGTCCGTAGCCTGCCCGGTAAATTCTTGGGGAAATCGGCCAGCTCAACTGGCCGAAGTCCGAGGAGACTGCCGGGCTTGGGACTGGGTGAGGTCAGAGGTACTTCAGGGGTAGGGGTAAAATCCTGTAATCCTTGAAGGACCACCAGTGGCGAAGGCGTCTGACTAGAACGGATCCGACGGTAAGGGACGAAGCCCTGGGGCACAAACG
ec4684ed87f34ce4873641336c310983	D_0__Bacteria;D_1__Chloroflexi;D_2__Anaerolineae;D_3__Anaerolineales;D_4__Anaerolineaceae;D_5__uncultured;D_6__uncultured hydrocarbon seep bacterium BPC110	TAGGGAATATTGCACAATGGGCGAAAGCCTGATGCAGCAACGCCGCGTGCGCGAAGAAGGCCTTCGGGTTGTAAAGCGCTTTTCTGGAGGAAGAGGAAGGACGGTACTCCAGGAATAAGGATCGGCTAACTACGTGCCAGCAGCCGCGGTAACACGTAGGATCCGAGCGTTATCCGAATTTACTGGGCGTAAAGCGCGTGTAGGCGGTCGGGTAAGTTGGACGTGAAAGCTCCTGGCTCAACTAGGAGAGGTCGTTCAAAACTGCCTGGCTAGAGGGTAAGAGAGGAAAGCGGAACTGCCGGTGTAAGGGTGAAATCTGTGGATATCGGCAGGAACGCCAGTGACGAAGGTGGCTTTCTGGTTTATACCTGACGCTCAGGGACGAAAGCTAGGGGAGAG…
b7ca8812e0896774ee025d2437a11355	D_0__Bacteria;D_1__Planctomycetes;D_2__Pla4 lineage	TCGAGGATTTTCCGCAATGGACGCAAGTCTGACGGAGCGACGCCGCGTGGAGGATGAAGGCCTTCGGGTTGTAAACTCCTGTCACGGGTTAGGAATGACTGTGCGTTAATAGCGTGCCGTTTGACAAAGGCCCGAAAGGAAGCCACGGCTAACTCCGTGCCAGCAGCCGCGGTAATACGGAGGTGGCAAGCGTTGCTCGGAATTACTGGGCATAAAGGGCGTCTAGGCGGATCAGTTAGTCGGCTGTGAAATCCCTCGGCTTAACCGAGGAAGTGCAGCCGATACTGCTGGTCTTGAGGGTGAGAGGGGAGAGTGGAACTCCTGGTGGAGCGGTGAAATGCGTAGATATCAGGAGGAACGCCGGTGGCGAAAGCGACTCTCTGGCTCATCCCTGACGCT…
70d1d02d9d2157d212de188433019154	D_0__Bacteria;D_1__Planctomycetes;D_2__Phycisphaerae;D_3__Phycisphaerales;D_4__Phycisphaeraceae;D_5__Urania-1B-19 marine sediment group;D_6__uncultured bacterium	TAACGAATCTTCCGCAATGCGCGAAAGCGTGACGGAGCAATGCCGCGTGCAGGATGAAGCCTCTCGGGGTGTAAACTGCTGTCAGGGTTTAGCAACACAATGAGCAGACCCAAAGGAAGGGCCGGCTAACTTCGTGCCAGCAGCCGCGGTAATACGAAGGGCCCGAGCGTTAATCGGAATCACTGGGCTTAAAGCGTACGTAGGCGGGTGCGCAGGCATCTTGTGAAATCCCTCGGCTCAACCGAGGAACTGCAGGGTGAACCGCGCATCTTGAGACGAGTAGGGGCTGTCGGAACGCTAGGTGGAGTGGTGAAATGCGTTGATATCTAGCGGAACGCCGAAGGAGAAATCAGGCAGCTGGGCTTGTTCTGACGCTGAGGTACGAAAGCGTGGGGAGCG…
7f2d803ec3179f45c3cff0bbe564162c	D_0__Bacteria;D_1__Elusimicrobia;D_2__Lineage IIb;D_3__uncultured Lentisphaerae bacterium;D_4__uncultured Lentisphaerae bacterium;D_5__uncultured Lentisphaerae bacterium;D_6__uncultured Lentisphaerae bacterium	TGAGGAATTTTGGACAATGGGGGAAACCCTGATCCAGCGACGCCGCGTGAAGGACGAAGGTCTTCGGATTGTAAACTTCTTTTCTCCAAGAACAAAAAATCTGTAGAGATACAGAGACTGAGGGTACTGGAGGAATAAGCCACGGCTAACTTCGTGCCAGCAGCCGCGGTAATACGAAGGTGGCAAGCGTTACTCGGAATGACTAGGCGTAAAGGGCAGGTAGGTGGTTCGGTAAGTCTGTTGTGAAAGCTCCCGGCTCAACTGGGAGAGGCCAACAGATACTGTCGAGCTTGAGTATAGGAGAGGTATCTGGAATTCCAGGTGTAGCGGTGAAATGCGCAGAGATCTGGAGGAACACCAATGGCGAAAGCAAGATACTGGACTATTACTGACACTCAG…
d49bb58593745977f311c141955a5569	D_0__Bacteria;D_1__Bacteroidetes;D_2__Bacteroidia;D_3__Bacteroidales;D_4__Bacteroidetes BD2-2;D_5__uncultured bacterium;D_6__uncultured bacterium	TGGGGAATATTGCGCAATAGGCGAAAGCCTGACGCAGCCACGCCGCGTGAGCGATGAAGGTTCTAGGATCGTAAAGCTCTGTGGAGGGAGAAGAATAAAGCAGGTGAAGAGCCTGCCCTGACGGTATCCCTTTAGCAAGCACCGGCTAACTCCGTGCCAGCAGCCGCGGTAATACGGAGGGTGCAAGCGTTATCCGGATTTATTAGGTTTAAAGGGTGTGTAGGCGGACTTTTAAGTCAGTGGTGAAATCCTGGGGCTCAACTCCAGAACTGCCATTGATACTGAAAGTCTTGAGTACAGTTGAAGTAGGCGGAATGTGTAATGTAGCGGTGAAATGCTTAGATATTACACAGAACACCGATTGCGAAGGCAGCTTACTAAGCTGTTACTGACGCTGAT…
596cd107786f5e7e466717a2a3473f42	D_0__Bacteria;D_1__Bacteroidetes;D_2__Bacteroidia;D_3__Flavobacteriales;D_4__Flavobacteriaceae;D_5__uncultured	TGAGGAATATTGGACAATGGAGGCAACTCTGATCCAGCCATGCCGCGTGCAGGAAGACGGCCCTATGGGTTGTAAACTGCTTTTATATAGGAAGAATCCTTTTCACTTGTGAGAAGTTGACGGTACTATAAGAATAAGGACCGGCTAACTCCGTGCCAGCAGCCGCGGTAATACGGAGGGTCCGAGCGTTATCCGGAATCATTGGGTTTAAAGGGTCCGTAGGCGGGTTTATAAGTCAGTGGTGAAAGTTTGCGGCTCAACCGTAAAATTGCCATTGATACTGTAGATCTTGAATTAGTGTGAAGTGGTTAGAATGTGTAGTGTAGCGGTGAAATGCATAGATATTACACAGAATACCAATTGCGAAGGCAGATCACTAACACTATATTGACGCTGAGG…
9438b23598ccc520d313fa3992b566b3	D_0__Bacteria;D_1__Chloroflexi;D_2__Anaerolineae;D_3__Anaerolineales;D_4__Anaerolineaceae;D_5__GWD2-49-16;D_6__Chloroflexi bacterium GWC2_49_37	TAGGGAATATTGCACAATGGACGAAAGTCTGATGCAGCAACACCGCGTGTATGATGAAGGTCTTCGGATCGTAAAATACTTTTCAGGGAGAAGAGAAAGGACGGTACCCCTGGAATAAGTCTCGGCTAACTACGTGCCAGCAGCCGCGGTAACACGTAGGAGGCGAGCGTTATCCGGATTTACTGGGTGTAAAGCGCGTGCAGGCGGTTTGATAAGTTGGATGTGAAAGCTCCCGGCTCAACTGGGAGAGGTCGTTCAAAACTATCAGACTAGAGGATGATAGAGGAAGATGGAATTCCCGGTGTAGTGGTGAAATGCGTAGATATCGGGAGGAACACCAGTGGCGAAGGCGGTCTTCTGGCTCATTTCTGACGCTAAGACGCGAAAGCTAGGGTAGCA…
3044c54156e49bb1b24c46b931ce57d0	D_0__Bacteria;D_1__Planctomycetes;D_2__Planctomycetacia;D_3__Pirellulales;D_4__Pirellulaceae;D_5__uncultured;D_6__uncultured organism	TCGAGAATCTTCGGCAATGGGCGCAAGCCTGACCGAGCGACGCCGCGTGCGGGATGAAGGCCTTCGGGTTGTAAACCGCTGTCAGAGGGGAGGAAATGCATGAGGGTTCTCTCTCATGTTTGACCTATCCTCAGAGGAAGTACGGGCTAAGTTCGTGCCAGCAGCCGCGGTAATACGAACCGTACGAACGTTATTCGGAATCACTGGGCTTAAAGAGTGCGTAGGCGGCTTGGTAAGTTGGGTGTGAAAGCCCTCGGCTCAACCGAGGAATTGCGCCCAAAACTACCAGACTTGAGGGAGGCAGAGGTAAGCGGAACTAATGGTGGAGCGGTGAAATGCGTTGATATCATTAGGAACACCTGAGGCGAAAGCAGCTTACTGGGCCTCTTCTGACGCTGA…
b4eab54e58fa273e9377c37f6b000d4a	D_0__Bacteria;D_1__Proteobacteria;D_2__Gammaproteobacteria;D_3__Gammaproteobacteria Incertae Sedis;D_4__Unknown Family;D_5__uncultured	TGGGGAATATTGCACAATGGGCGCAAGCCTGATGCAGCAATGCCGCGTGTGTGAAGAAGGCCTGCGGGTTGTAAAGCACTTTTATTAGGAAAGAAAAACGCGAAGTTAATACCTTCGAACTTGACGGTACCTAAAGAATAAGCACCGGCTAACTCAGTGCCAGCAGCCGCGGTAATACTGAGGGTGCAAGCGTTAATCGGAATTACTGGGCGTAAAGCGAGTGTAGGCGGCTTCGTAAGTCGGATGTGAAAGCCCTGGGCTTAACCTGGGAATGGCATTCGATACTGCGCGGCTAGAGTTTGATAGAGGGAAGTGGAATTCCAGGTGTAGCGGTGAAATGCGTAGAGATCTGGAGGAACACCAGTGGCGAAGGCGGCTTCCTGGATCAAAACTGACGCT…
bf0d9339eed74aa2a0b3ab538f3106e4	D_0__Bacteria;D_1__Bacteroidetes;D_2__Bacteroidia;D_3__Bacteroidales;D_4__Marinilabiliaceae;D_5__uncultured;D_6__uncultured Bacteroidetes bacterium	TGAGGAATATTGGTCAATGGACGGAAGTCTGAACCAGCCATCCCGCGTGCAGGACGACGGCCCTATGGGTTGTAAACTGCTTTTCTGAAGGAAGAATAATAGCGATGTATCGTTATACGACGGTACTTCAGGAATAAGCATCGGCTAACTCCGTGCCAGCAGCCGCGGTAATACGGAGGATGCAAGCGTTATCCGGATTTATTGGGTTTAAAGGGTGCGTAGGCGGACCAGTAAGTCAGTGGTGAAATCTTTCGGCTCAACCGAGAAACTGCCATTGATACTGTTGGTCTTGAGTTCGGCAGAGGTAGGCGGAATGTGTAATGTAGCGGTGAAATGCTTAGATATTACACAGAACACCAATTGCGTAGGCAGCTTACTATACCGACACTGACGCTGAGG…
d4475932f3ebc4c55e7af7f8fbb30666	D_0__Bacteria;D_1__Bacteroidetes;D_2__Bacteroidia;D_3__Flavobacteriales;D_4__Crocinitomicaceae;D_5__Crocinitomix;D_6__uncultured bacterium	TGAGGAATATTGGACAATGGGCGCAAGCCTGATCCAGCCATGCCGCGTGAAGGAAGAAGGTCCTACGGATTGTAAACTTCTTTTATTTGGGAAGAAACTTCTCTGCGTGTAGAGAACTGACGGTACCAAACGAATAAGGACCGGCTAACTCCGTGCCAGCAGCCGCGGTAATACGGAGGGTCCAAGCGCTATCCGGAATCATTGGGTTTAAAGGGTTCGCAGGCTGTCCAATAAGTCAGTGGTGAAATCTCTCGGCTCAACCGAGAAACTGCCATTGATACTGTTGGGCTTGAATATAGTTGGAGTAGGCGGAATGTGTAGTGTAGCGGTGAAATGCTTAGATATTACACAGAACACCGATAGCGAAGGCAGCTTACTAAACTATTATTGACGCTCATG…
00a55d50a903f378c6800ff265bb4104	D_0__Bacteria	TAGGGAATCTTCGACAATGGGCGCAAGCCTGATCGAGCAACGCCGCGTGAGGGACGACGGTCTTCGGATTGTAAACCTCTGTTATAAGGGAAGAACAGTTAGAGTAGGAAATGGCTCTAGCCTGACGGTACCTTATTAGAAAGCCACGGCTAACTACGTGCCAGCAGCCGCGGTAATACGTAGGTGGCAAGCGTTATCCGGATTTACTGGGCGTAAAGCGTATGCAGTCTGTTTGTTAAGTCTGATGTTAAAGCCCGGGGCTCAACCCCGGCCCGCATTGGAAACTGGCAAACTAGAGTTATGGAGAGGTTAGTGGAATTCCTAGTGTATCGGTGGAATGAGTAGATATTAGGAGGAACACCAGTGGCGAAGGCGACTAACTGGACAATAACTGACGAT…
f88a79b0900af9200064d331076125b6	D_0__Bacteria;D_1__Planctomycetes;D_2__Planctomycetacia;D_3__Pirellulales;D_4__Pirellulaceae;D_5__Rhodopirellula;D_6__uncultured bacterium	TCGAGAATCTTCCGCAATGGACGAAAGTCTGACGGAGCGACGCCGCGTGCGGGATGAAGGCCCTCGGGTTGTAAACCGCTGTCAGTTGGGAGGAAATGCATAAGGGTTCTCTCTTATGTTTGACCAATCTTCAGAGGAAGTCCGGGCTAAGTTCGTGCCAGCAGCCGCGGTAAGACGAACCGGACGAACGTTATTCGGAATTACTGGGCTTAAAGAGTGCGTAGGCGGCTTGGTAGGTTGGGTGTGAAATCCCACAGCTCAACTGTGGAACTGCGCTCAAAACCCCCAAGCTTGAGGAAGGCAGAGGTGAGCGGAACTGATGGTGGAGCGGTGAAATGCGTTGATATCATCAGGAACACCGGTGGCGAAGGCGGCTCACTGGGCCTTTTCTGACGCTGA…
0934dad33e2da21c67b7e83cf853e84a	D_0__Bacteria;D_1__Bacteroidetes;D_2__Rhodothermia;D_3__Rhodothermales;D_4__Rhodothermaceae;D_5__uncultured;D_6__uncultured bacterium	TGAGGAATATTGCGCAATGGGGGAAACCCTGACGCAGCCACGCCGCGTGGAGGATGACACCGTTATGCGGCGTAAACTCCTTTTATATGAGAAGAAAACCCGGCTCGGTCGGGCCTGACGGTATCATATGAATAAGCACCGGCTAACTCCGTGCCAGCAGCCGCGGTAATACGGAGGGTGCAAGCGTTGTCCGGAATCACTGGGTGTAAAGGGTGTGTAGGCGGGATTGTAAGTCAGAGGTGAAATCCTACAGCTCAACTGTAGAACTGCCTTTGATACTGCAATTCTTGAGTTTCGGAGAGGTCATTAGAATTCGTGGTGTAGCGGTGAAATGCGTAGATATCACGAGGAATACCAGAGGCGTAGGCGGATGACTGGACGAATACTGACGCTGAGGCA…
7fa3e6d0893542d0bbf80efe625fac1e	D_0__Bacteria;D_1__Verrucomicrobia;D_2__Verrucomicrobiae;D_3__Opitutales;D_4__Opitutaceae;D_5__Alterococcus;D_6__uncultured Verrucomicrobiales bacterium	TTTCGAATCATTCACAATGGGCGAAAGCCTGATGGTGCGACGCCGCGTGGGGGATGACGGCCTTCGGGTTGTAAACCCCTGTCACCGGGGACAAAACGTCGTTGGTTAATAACCGACGACCTGATTTAACCCGGAGAGGAAGCAGTGGCTAACTCCGTGCCAGCAGCCGCGGTAATACGGAGACTGCAAGCGTTGTTCGGATTTACTGGGCGTAAAGGGTGCGCAGGCGGCCGGATGTGTCGGGTGTGAAATTTCGAGGCTCAACCTCGAAACTGCGCTCGAAACTATCCGGCTAGAGTACTGGAGAGGGAGGCGGAATTCATGGTGTAGCAGTGAAATGCGTAGATATCATGAGGAACACCAGTGGCGAAGGCGGCCTCCTGGACAGTTACTGACGCT…
04002fdcec37f3659028bc6150010bef	D_0__Bacteria;D_1__Actinobacteria;D_2__Actinobacteria;D_3__Pseudonocardiales;D_4__Pseudonocardiaceae;D_5__Pseudonocardia	TGGGGAATATTGCGCAATGGGCGGAAGCCTGACGCAGCGACGCCGCGTGGGGGATGACGGCCTTCGGGTTGTAAACCTCTTTCGCCATCGACGAAGCTTTTCGGAGTGACGGTAGGTGGAGAAGAAGCACCGGCCAACTACGTGCCAGCAGCCGCGGTAATACGTAGGGTGCGAGCGTTGTCCGGAATTATTGGGCTTAAAGAGCTCGTAGACGGTTTTTTAAGTAAGGTGTGAAATCCCTGAGCTCAACTCAGGAACTGCGCCTTATACTGAAAGACTAGAGTTTGATAGAGGAAAATAGAACTTCTAGTGGAGAGGTGAAATTCATAGATATTAGAAGGAATACCAGAGGCGAAGGCGATTTTCTGGATCAATACTGACGTTGTAGAGCGAAAGCGT…
216865a5329938e48f71f00af074e8a4	D_0__Bacteria;D_1__Planctomycetes;D_2__Planctomycetacia;D_3__Pirellulales;D_4__Pirellulaceae;D_5__Blastopirellula;D_6__uncultured bacterium	TCGAGAATCTTCCGCAATGGACGCAAGTCTGACGGAGCGACGCCGCGTGCGGGATGAAGGCCTTCGGGTTGTAAACCGCTGTCAGTGGGGTGGAAATCGTATGGGGTTATCCCCATATGTTGACCTAACCGCAGAGGAAGTCCGGGCTAAGTACGTGCCAGCAGCCGCGGTAATACGTACCGGACAAACGTTATTCGGAATCACTGGGCTTAAAGAGTGCGTAGGCGGCCTTGCAGGTGGGGTGTGAAAGCCCACGGCTCAACCGTGGAACTGCGCTCCAAACCGCAAGGCTTGAGGGAGACAGAGGTGAGCGGAACTGATGGTGGAGCGGTGAAATGCGTTGATATCATCAGGAACACCCGTGGCGAAGGCGGCTCACTGGGTCTCTTCTGACGCTGA…
14e1fb8101ed94be7f6b9417d8aa6174	D_0__Bacteria;D_1__Cyanobacteria;D_2__Oxyphotobacteria;D_3__Chloroplast;D_4__Planoglabratella opercularis;D_5__Planoglabratella opercularis;D_6__Planoglabratella opercularis	TGGGGAATTTTCCGCAATGGGCGAAAGCCTGACGGAGCAATACCGCGTGAGGGATGACGGCCTATGGGTTGTAAACCTCTTTTTTCAGGGAGGAATCAAATGACGTGTACCTGAAGAATAAGCATCGGCTAACTCCGTGCCAGCAGCCGCGGTAAGACGGAGGATGCAAGTGTTATCCGGAATCACTGGGCGTAAAGCGTCTGTAGGTGGTCAAATAAGTCAACTGTTAAATCTTGAGGCTCAACCTCGAAATCGCAGTCGAAACTGTTAGACTAGAGTATAGTAGGGGTAAAGGGAATTTCCAGTGGAGCGGTGAAATGCGTAGAGATTGGAAAGAACACCGATGGCGAAGGCACTTTACTGGGCTATTACTAACACTGAGAGACGAAAGCTAGGGTA…
2e18b3b80e316f1f3fe2352e268a33eb	D_0__Bacteria;D_1__Bacteroidetes;D_2__Bacteroidia;D_3__Bacteroidales;D_4__Bacteroidetes BD2-2;D_5__uncultured bacterium;D_6__uncultured bacterium	TGAGGAATATTGGTCAATGGGCGAGAGCCTGAACCAGCCATGCCGCGTGAAGGAAGACTGCCCTATGGGTTGTAAACTTCTTTTGTATGGGAAGAAAACGTTCTACGTGTAGAGCACTGACGGTACCATACGAATAAGCACCGGCTAACTCCGTGCCAGCAGCCGCGGTAATACGGAGGGTGCAAGCGTTATCCGGATTTATTAGGTTTAAAGGGTGTGTAGGCGGACTTTTAAGTCAGTGGTGAAATCCTGGGGCTCAACTCCAGAACTGCCATTGATACTGAAAGTCTTGAGTACAGTTGAAGTAGGCGGAATGTGTAATGTAGCGGTGAAATGCTTAGATATTACACAGAACACCGATTGCGAAGGCAGCTTACTAAGCTGTTACTGACGCTGATG…
717c67c9933a6f477a6d0ff115bd63fa	D_0__Bacteria;D_1__Latescibacteria;D_2__uncultured Bacteroidetes bacterium;D_3__uncultured Bacteroidetes bacterium;D_4__uncultured Bacteroidetes bacterium;D_5__uncultured Bacteroidetes bacterium;D_6__uncultured Bacteroidetes bacterium	TGGGGAATATTGCACAATGGGGGAAACCCTGATGCAGCGACGCCGCGTGAAGGATGAAGGTTTTCGGATCGTAAACTTCTTTGATCGGGGACGAAAAATGACGGTACCATCAGAGGAAGCACCGGCTAACTCCGTGCCAGCAGCCGCGGTAATACGGAGGGTGCAAGCGTTGTTCGGATTCACTGGGTATAAAGGGTGCGCAGGCGGCCTGTTAAGTCAGGGGTGAAATATGACGGCTCAACCGTCAAACTGCCCCTGAAACTGCCAGGCTTGAGTCCGGGAGAGGAAGGTGGAATTCCAGGTGTAGCGGTGAAATGCGTAAATATCTGGAGGAACACCAGTGGCGAAGGCGGCCTTCTGGCCCGGAACTGACGCTCAGGCACGAAAGCATGGGGAGCG…
18d7c3f2888e25b8576a2b1513ef4d25	D_0__Bacteria;D_1__Planctomycetes;D_2__Phycisphaerae;D_3__Phycisphaerales;D_4__Phycisphaeraceae;D_5__SM1A02;D_6__uncultured organism	TAACGAATCTTCCGCAATGCGCGAAAGCGTGACGGAGCAATGCCGCGTGTGGGATGAAGCGGTTACGCCGTGTAAACCACTGTCAGGACCTAGAAAGAACTGATCAGGTCCAAAGGAAGGGCCGGCTAATCTCGTGCCAGCAGCCGCGGTAAGACGAGAGGCCCGAGCGTTATTCGGAATCACTGGGCTTAAAGCGTGCGCAGGCGGACCGGTAAGCGTCTTGTGAAATCCCTCGGCTCAACCGAGGAATTGCAGGGCGAACTGCCAGTCTTGAGGAAGGTAGAGGCTGTCGGAACGTTCGGTGGAGCGGTGAAATGCGTAGATATCGAACGGAACGCCGAAGGAGTAGTCAGGCAGCTGGGCCTTTCCTGACGCTCAGGCACGAAAGCGTGGGGATCA…
9fe8d21435f580af6033850ae81d7b97	D_0__Bacteria;D_1__Epsilonbacteraeota;D_2__Campylobacteria;D_3__Campylobacterales;D_4__Sulfurovaceae;D_5__Sulfurovum	TAAGGAATATTGGACAATGGGCGGAAGCCTGATCCAGCCATCCCGCGTGCAGGATGACGGCCCTAGTGGTTGTAAACTGCTTTTATTTGGGAAGAATTCTGTGCATTTATGTGCTGTTGACGGTACCTTATGAATAAGCACCGGCTAACTCCGTGCCAGCAGCCGCGGTAATACGGAGGGTGCAAGCGTTATCCGGAATCACTGGGCGTAAAGCGCGCGCAGGCGGCCTATTAAGTTGGATGTGAAAGCCTACGGCTCAACCGTAGAACTGCATCCAAAACTATTAGGCTAGAGTGTGGGAGAGGAAGATGGAATTAGTTGTGTAGGGGTAAAATCCGTAGAGATAACTAGGAATACCAAAAGCGAAGGCAATCTTCTGGAACATTACTGACGCTGAGG…
d451d69ba03080ef8ca1f7846c01f1c9	D_0__Bacteria;D_1__Lentisphaerae;D_2__Oligosphaeria;D_3__P.palmC41	TCGAGAATCTTCCGCAATGGGCGCAAGCCTGACGGAGCAATGCCGCGTGAATGATGAAGGCCTTCGGGTTGTAAAATTCTGTCACCTAGGACGAAATCTGACGGTACTAGGAGAGGAAGTGACGGCTAACTACGTGCCAGCAGCCGCGGTAATACGTAGGTCACGAGCGTTAATCGGATTTATTGGGCGTAAAGGGTCCGCAGGGGGTATGTCAAGTTAGATGTGAAATCCTATGGCTCAACCATAGAACTGCATTTAAAACTGATGTACTGGAGTGTCGGAGAGGAGAGCAGAATTCCTGGTGTAGCGGTGGAATGCTTAGATATCAGGAGGAATACCAAAAGCGAAGGCAGCTCTCTGGACGACTACTGACCCTCATGGACGAAAGCGTGGGTAGCA…
f552adb618feeb0da027e0dbd7fefe3b	D_0__Bacteria;D_1__Proteobacteria;D_2__Deltaproteobacteria;D_3__Desulfobacterales;D_4__Desulfobacteraceae	TCGAGAATCTTCGGCAATGAGCGAAAGCCTGACCGAGCGACGCCGCGTGCGGGATGAAGGCCCTCGGGTTGTAAACCGCTGTCAGTAGGGAGGAAATCCTTGGGGGTTATCCCCCTCGGTTGACCTATCTTCAGAGGAAGTCCGGGCTAAGTTCGTGCCAGCAGCCGCGGTAATACGGGGGGTGCAAGCGTTATTCGGAATTATTGGGCGTAAAGCGAGTGCAGGCGGTTTGTTAAGTCAGATGTGAAAGCCCGGGGCTCAACCCCGGAAGTGCATTTGAAACTGGCAGACTTGAGTATGGGAGAGGAAAGTGGAATTCCTGGTGTAGAGGTGAAATTCGTAGATATCAGGAGGAACACCAGTGGCGAAGGCGACTTTCTGGACCAATACTGACGCTCA…
526e794333e3bfa133f4a65890af1612	D_0__Bacteria;D_1__Actinobacteria;D_2__Thermoleophilia;D_3__Gaiellales;D_4__uncultured	TGGGGAATCTTGCGCAATGGGCGAAAGCCTGACGCAGCAACGCCGCGTGGGGGAAGAAGGCCTTCGGGTTGTAAACCCCTGTCAGGAGGGACGAAGCCACCTGCGTTAATAGCGTAAGGGGTGACGGTACCTCCAGAGGAAGCCCCGGCTAACTACGTGCCAGCAGCCGCGGTAATACGTAGGGGGCGAGCGTTGTCCGGATTTATTGGGCGTAAAGAGCGTGTAGGCGGCCATGTAAGTCTGATGTGAAATCTTGCGGCTTAACCGCAAGCCTGCATTGGAAACTGCGTGGCTAGAGTCTGGATGAGGAGAATGGAATTCCTGGTGTAGCGGTGAAATGCGCAGATATCAGGAGGAACACCGGTGGCGAAGGCGGTTCTCTAGGACAGTACTGACGCT…
2280b030dd96fe4d1b2052c745c00e1e	D_0__Bacteria;D_1__Planctomycetes;D_2__Planctomycetacia;D_3__Pirellulales;D_4__Pirellulaceae;D_5__Pir4 lineage;D_6__uncultured planctomycete	TCGAGAATCTTCGGCAATGGGCGAAAGCCTGACCGAGCAATGCCGCGTGCGGGATGAAGGCCCTCGGGTTGTAAACCGCTGTCAGTTGGGAGGAAATCACCTGGGGCAATCCCCTCGTGTTGACCTATCTTCAGAGGAAGGACGGGCTAAGTTCGTGCCAGCAGCCGCGGTAACACGAACCGTCCAAACGTTATTCGGAATTATTGGGCTTAAAGGGTGCGTAGGCGGCGCGGTAAGTGAGGTGTGAAATCCCTCGGCTCAACCGAGGAACTGCGCTTCATACTGCCGTGCTTGAGGGAGACAGGGGTAAGCGGAACTGATGGTGGAGCGGTGAAATGCGTTGATATCATCAGGAACACCAGTGGCGAAGGCGGCTTACTGGGTCTCTTCTGACGCTGA…
40ca7ace150781b70167830c0a9cc265	D_0__Bacteria;D_1__Firmicutes;D_2__Clostridia;D_3__Clostridiales;D_4__Christensenellaceae;D_5__uncultured;D_6__bioreactor metagenome	TGGGGAATATTGGGCAATGGACGCAAGTCTGACCCAGCGACGCCGCGTGAGGGAAGAAGGTTTTCGGATTGTAAACCTCTGTCCTTGGGGACGAAAAAAATGACGGTACCCAAGGAGGAAGCTCCGGCTAACTACGTGCCAGCAGCCGCGGTAATACGTAGGGAGCAAGCGTTGTCCGGAATTACTGGGCGTAAAGGGTGCGTAGGCGGTAAGATAAGTCAGGTGTGAAATCCCCGAGCTCAACTCGGGAATTGCATTTGAAACTGTCTAACTTGAGTGTGAGAGAGGTAAGTGGAATTCCTAGTGTAGCGGTGAAATGCGTAGATATTAGGAGGAACACCAGTGGCGAAGGCGACTTACTGGCTCATAACTGACGCTGAGGCACGAAAGCGTGGGGAG…
bfa3f6d1be19e846cdd7c1842a7a6820	D_0__Bacteria;D_1__Patescibacteria;D_2__Gracilibacteria;D_3__Candidatus Peribacteria;D_4__uncultured bacterium;D_5__uncultured bacterium;D_6__uncultured bacterium	TGAGGAATCTTCCGCAATGGGCGAAAGCCTGACGGAGCGACACCGCGTGAAGGATGACACCCTTTTCGGGCGTAAACTTCTGTTCTGAGGGACGAAATTTTTGACGGTACCTCAGGAGAAAGCACCGGCTAATTCCGTGCCAGCAGCCGCGGTAAGACGGAAGGTGCAAGCGTTACTCGGAATCACTGGGCGTAAAGCGTCCGCAGCCGTCCCACACAAGTCCGGCGTAAAATTTCGGAGCTCAACTCCGAATTCGTGCTAGAAACTAGTGGGATTGAGTTATTCAGGGGCATCTGGAATATCGTATGTAGGGGTAAAATCCGTTGATCTACGATGGAACGCCAAAAGCGAAGGCAGGATGCTGGGAATATACTGACGGTCAGGGACGAAAGCGTGGGT…
90fd74d80689e064e9998c0d19af7cae	D_0__Bacteria;D_1__Spirochaetes;D_2__V2072-189E03;D_3__uncultured organism;D_4__uncultured organism;D_5__uncultured organism;D_6__uncultured organism	ATAAGAATCTTGGACAATGGACGCAAGTCTGATCCAGCGACGCCGCGTAGATGATGAAGGTTTTCGGATTGTAAAATCTAGTAAGTAGAGACGAATAAGCATGAGGTAATATTTCATGTGATGACGGTATCTACCTAAAGCCACGGCTAAATACGTGCCAGCAGCCGCGGTAATACGTATGTGGCAAGCGTTGTTCGGAATTATTGGGCATAAAGGGCATCTAGGCGGGATATTAAGTCGGGTGTGAAATCTCGAGGCTCAACCTCGAAACTGCATTCGATACTGATATTCTTGAGTAAGGGAGAGGAAAGCGGAATTCCTGGTGTAGCGGTGAAATGCGTAGATATCAGGAAGAACACCGGTGGCGAAGGCGGCTTTCTGGCCTATTACTGACGCTAA…
c696b49c85290b10095f8cdf94bcc9af	D_0__Bacteria;D_1__Latescibacteria	TCGAGAGGCTTCGGCAATGGGGGAAACCCTGACCGAGCGACGCCGCGTGCGGGATGACGGCCCTCGGGTTGTAAACCGCTGTCAGGAGGGAAGAATCCCCTCGGGCCAATACCCCGAGGGTTGACGGTACCTCCAGAGGAAGCTCCGGCTAACTCCGTGCCAGCAGCCGCGGTAATACGGAGGGAGCGAACGTTGTTCGGATTTACTGGGCGTAAAGGGCGTGTAGGCGGTCTAGCAAGTCAGGGGTGAAATGCCACGGCTCAACCGTGGACGTGCCTTTGAAACTGCTGGACTTGAGGCCGTGAGAGGAGACTGGAATTCCCGGTGTAGCGGTGAAATGCATAGATATCGGGAAGAACACCAGTGGCGAAGGCGAGTCTCTGGCACGGTTCTGACGCT…
72425ac1a371a0651e72b330a98930ce	D_0__Bacteria;D_1__Proteobacteria;D_2__Deltaproteobacteria;D_3__Desulfobacterales;D_4__Desulfobulbaceae	CCGCGGTAATACGGAGGGTGCAAGCGTTGTTCGGAATTACTGGGCGTAAAGCGCGCGTAGGCGGCTATACAAGTCAGGTGTGAAAGTCCACGGCTCAACCGTGGAAGTGCATTTGAAACTGTGTAGCTTGAGTACTGGAGGGGGTAGTGGAATTCCCGGTGTAGAGGTGAAATTCGTAGATATCGGGAGGAATACCGGTGGCGAAGGCGACTACCTGGCCAGATACTGACGCTGAGGTGCGAAAGCGTGGGGAGCAAACA
95e00ee1270c605ca55d606964c26a75	D_0__Bacteria;D_1__Bacteroidetes;D_2__Bacteroidia;D_3__Chitinophagales;D_4__Saprospiraceae	CAACGAATATTCCGCAATGGGCGCAAGCCTGACGGAGCGACGCCGCGTGCAGGATGAAGTCCTTCGGGATGTAAACTGCTGTCAGGGGTCAGAAAGCAAGTGATCAACCCCAAAGGAAGCATCGGCTAACCCCGTGCCAGCAGCCGCGGTAATACGGAGGATGCGAGCGTTGTTCGGAATCACTGGGCTTAAAGGGTGCGTAGGCGGCTATATAAGTCAGGAGTGAAATGTTCCCGCTTAATGGGAGAGCTGCTTTTGATACTGTATAGCTTGAATTAGGTTGAGGTTAGCGGAATGTGGCATGTAGCGGTGAAATGCATAGATATGCCATAGAACACCGATTGCGAAGGCAGCTAGCTGGACCTTAATTGACGCTGAGGCACGAAAGCGTGGGGAGCG…
569b165319df787517d91af126c783ef	D_0__Bacteria;D_1__Chloroflexi;D_2__Anaerolineae;D_3__Anaerolineales;D_4__Anaerolineaceae;D_5__Anaerolineaceae UCG-001;D_6__uncultured bacterium	TAGGGAATATTGCCCAATGGACGAAAGTCTGAGGCAGCAACGCCGCGTGTGCGAAGAAGGTCTTCGGATTGTAAAGCACTTTTGACAGGGAAGAGGAAGGACAGTACCTGTAGAATAAGCTTCGGCTAACTACGTGCCAGCAGCCGCGGTAACACGTAGGAAGCAAGCGTTATCCGGATTTACTGGGCGTAAAGCGCGTGCAGGCGGGCTTGTAAGTTAGATGTGAAATCTCCTGGCTTAACTGGGAGAGGTCGTCTAAAACTGCGAGTCTGGAGTGTGAGAGAGGGAGGCAGAATTCCGAGTGTAGTGGTGAAATGCGTAGATATTCGGAGGAATACCAGAGGCGAAGGCGGCCTCCTGGCTCACAACTGACGCTGAGACGCGAAAGCTAGGGTAGCA…
8802f4fc1bdf0132cb5c8d97be28732b	D_0__Bacteria;D_1__Bacteroidetes;D_2__Bacteroidia;D_3__Flavobacteriales;D_4__Flavobacteriaceae;D_5__uncultured	TGAGGAATATTGGACAATGGAGGCAACTCTGATCCAGCCATGCCGCGTGCAGGAAGACGGCCCTATGGGTTGTAAACTGCTTTTATATAGGAAGAATCCTTCTTACGTGTAAGAAGTTGACGGTACTATAAGAATAAGGACCGGCTAACTCCGTGCCAGCAGCCGCGGTAATACGGAGGGTCCGAGCGTTATCCGGAATCATTGGGTTTAAAGGGTCCGTAGGCGGGTTTATAAGTCAGTGGTGAAAGTTTGCGGCTCAACCGTAAAATTGCCATTGATACTGTAGATCTTGAATTAGTGTGAAGTGGTTAGAATGTGTAGTGTAGCGGTGAAATGCATAGATATTACACAGAATACCAATTGCGAAGGCAGATCACTAACACTATATTGACGCTGAGG…
146413ee432bfa370010f517219cfef6	D_0__Bacteria;D_1__Bacteroidetes;D_2__Bacteroidia;D_3__Cytophagales;D_4__Cyclobacteriaceae;D_5__uncultured	TGAGGAATATTGGTCAATGGGCGCAAGCCTGAACCAGCCATCCCGCGTGCAGGAAGACGGCCCTATGGGTTGTAAACTGCTTTTGCAAGGGAAGAATAATTTCGATGTATCGGGATATGACGGTACCTTGCGAATAAGCATCGGCTAACTCCGTGCCAGCAGCCGCGGTAATACGGAGGATGCAAGCGTTATCCGGATTTATTGGGTTTAAAGGGTGCGTAGGCGGATTATTAAGTCAGTGGTGAAAGTTTGCGGCTCAACCGTAAAAGTGCCATTGAAACTGGTAGTCTTGAGTACAGTAGAGGTAGGCGGAATTTATGGTGTAGCGGTGAAATGCATAGATACCATAAAGAACACCGATAGCGAAGGCAGCTTACTATACTGAGACTGACGCTGAGG…
2a686786a8373a5c0a2811168ca4c8c3	D_0__Bacteria;D_1__Proteobacteria;D_2__Deltaproteobacteria;D_3__Bdellovibrionales;D_4__Bdellovibrionaceae;D_5__OM27 clade;D_6__uncultured bacterium	TGGGGAATATTGCGCAATGGGCGAAAGCCTGACGCAGCCACGCCGCGTGTGTGATGAAGGCCCTAGGGTCGTAAAGCACTGTCGGGGGGAAAGAAGTTCTGACGGTACCCCCCAAGAAAGCACCGGCTAACTCCGTGCCAGCAGCCGCGGTAATACGGAGGGTGCAAGCGTTGCTCGGAATCACTGGGCGTAAAGCGTACGCAGGCGGCTTGATAAGTTGGGTGTGAAAGCCCGGGGCTCAACCCCGGAACTGCATTCAAAACTGTCTGGCTTGAATACGGGAGAGGGAAGCGGAATTCCTGGTGTAGAGGTGAAATTCGTAGATATCAGGAGGAACACCAGTGGCGAAAGCGGCTTCCTGGCCCGATATTGACGCTCATGTACGAAAGCGTGGGGAGC…
f8bcb2061cd3e4afa4c3fc1cc2f5dc86	D_0__Bacteria;D_1__Nitrospirae;D_2__Thermodesulfovibrionia;D_3__uncultured;D_4__uncultured bacterium;D_5__uncultured bacterium;D_6__uncultured bacterium	TGGGGAATTTTGCGCAATGGGCGAAAGCCTGACGCAGCGACGCCGCGTGGAGGAAGAAGGCCTTTGGGTTGTAAACTCCTTTCGTGAGGGAAAAAGTCCCGAGCAATCGGGATGATGGTACCTCAGGAAGAAGCCACGGCTAACTCTGTGCCAGCAGCCGCGGTAATACAGAGGTGGCAAGCGTTGTTCGGATTTACTGGGCTTAAAGGGCGTGTAGGCGTCCTGATAAGTCAGATGTGGAAGCCTTGGGCTTAACCCAAGAAGTGCATTTGAAACTGTCGGGATTGAGTCGTACATGGGAGGGCGGAATTCCTGGTGTAGCGGTGAAATGCGTAGATATCAGGAGGAAGGCCAGTGGTGAAGACGGCCCTCTGGGTAATGACTGACGCTGAGGCGCGA…
9b3b8c86589dea92781c4992a6fc62d7	D_0__Bacteria;D_1__Planctomycetes;D_2__Phycisphaerae;D_3__CCM11a;D_4__uncultured deep-sea bacterium;D_5__uncultured deep-sea bacterium;D_6__uncultured deep-sea bacterium	CAACGAATATTCCGCAATGGACGCAAGTCTGACGGAGCGACGCCGCGTGCAGGAAGAAGTCCCTCGGGATGTAAACTGCTGTCAGGGGTTAGGAACACCGACCAGCCCCAGAGGAAGCACTGGCTAACTCCGTGCCAGCAGCCGCGGTAATACGGAGAGTGCAAGCGTTGTTCGGAATTACTGGGCTTAAAGAGCATGTAGGCGGGACGTCAAGTGTCGGGTGAAAACCCCAGGCTCAACCTGGGAACTGCCCGGCAAACTGGCATTCTTGAGGCAGGTAGAGGTGACCGGAACAACTGGTGGAGCGGTGAAATGCGTAGATATCAGTTGGAACGCCGGCGGCGAAAGCGGGTCACTGGACCTGTCCTGACGCTGAGATGCGAAAGCGTGGGTAGCGAA…
d35b4e0a6724ae2f9608f8860b96bc18	D_0__Bacteria;D_1__Bacteroidetes;D_2__Rhodothermia;D_3__Rhodothermales;D_4__Rhodothermaceae;D_5__uncultured;D_6__uncultured Bacteroidales bacterium	TGAGGAATATTGGGCAATGGGCGAAAGCCTGACCCAGCCACGCCGCGTGCAGGATGACACCCCTATGGGGCGTAAACTGCTTTTATATGAGAAGAACAACCTGGATTCGTCCGGGTCTGACGGTATCATACGAATAAGGACCGGCTAACTCCGTGCCAGCAGCCGCGGTAATACGGAGGGTCCAAGCGTTGTCCGGATTTATTGGGTGTAAAGGGTGTGTAGGCGGGCTTGTCAGTCAGAGGTGAAATCCTACGGCTCAACCGTAGAACTGCCTTTGATACTGCAGGTCTTGAGTCCTGGAGAGGTTGTTTGAATTCGTGGTGTAGCGGTGAAATGCGTAGATATCACGAGGAATACCGGTTACGAAGGTTGACAACTGGACAGGTACTGACGCTGAGG…
ab8e9dbd8ff25bf72b187992835a8b69	D_0__Bacteria;D_1__Patescibacteria;D_2__Parcubacteria;D_3__Candidatus Jorgensenbacteria;D_4__Candidatus Adlerbacteria bacterium GW2011_GWC1_50_9;D_5__Candidatus Adlerbacteria bacterium GW2011_GWC1_50_9;D_6__Candidatus Adlerbacteria bacterium GW2011_GWC1_50_9	TCGAGAATATTCGACAATGGGCGAAAGCCTGATCGAGCGACACCGCGTGCAGGATGAAGGCCTTCGGGTTGTAAACTGCGGTAGTCTGTGAACAAACTTCGGTTGAGATTAGCAGATGGAAAGAGGTGGGTAACTACGTGCCAGCACCAGCGGTAATACGTAGACCTCAAGCGTTATCCGGAATTATTGGGCGTAAAGCGCATGTAGGAGGTTTGATGCGTCTTTGGTTAAAGCCCACTGCCCAACGGTGGAACTGCCAAAGATACGGTCAGACTAGAGGAAGTTAGAGGTGTGCGGAACTCACGGTGTAGGGGTGATATCCGTTGATATCGTGGGGAACACCAAAGGCGAAGGCAACACACTGGGACTTTCCTGACTCTGAGATGCGAAAGCGTGGGG…
09e6903f6c517f38d7d0b1d4902393ce	D_0__Bacteria;D_1__Proteobacteria;D_2__Alphaproteobacteria	TGGGGAATCTTGCACAATGGGCGAAAGCCTGATGCAGCCATGCCGCGTGAGTGAAGAAGGCCTTAGGGTTGTAAAGCTCTTTCACCAGGGAAGATAATGACGGTACCTGGAGAAGAAGCCCCGGCTAACTCCGTGCCAGCAGCCGCGGTAATACGGAGGGGGCTAGCGTTGTTCGGAATTACTGGGCGTAAAGCGCACGTAGGCGGATGATCAAGTTGGGGGTGAAAGCCCAGGGCTCAACCCTGGAACTGCCCTCAAAACTGGTCGTCTCGAGTACGGGAGAGGTGAGTGGAATTCCTAGTGTAGAGGTGAAATTCGTAGATATTAGGAAGAACACCAGTGGCGAAGGCGGCTCACTGGCCCGTTACTGACGCTAAGGTGCGAAAGCGTGGGGAGCAA…
5398c1be14e265076af0c743b982c27f	D_0__Bacteria;D_1__Proteobacteria;D_2__Deltaproteobacteria;D_3__SAR324 clade(Marine group B);D_4__uncultured bacterium;D_5__uncultured bacterium;D_6__uncultured bacterium	TTAGGAATTTTGCGCAATGGGGGAAACCCTGACGCAGCAACGCCGCGTGAGTGAGGAAGGCCTTCGGGTTGTAAAGCTCTTTTAGTGGGGAAGAAAAAAATGACGGTACCCACAGAAAAAGCACCGGCTAACTCCGTGCCAGCAGCCGCGGTAATACGGAGGGTGCAAGCGTTGCTCGGATTTACTGGGCGTAAAGAGCATGTAGGTGGTTTGGTAAGTCTGATGTGAAAGCCCACGACTCAATCGTGGAAGTGCATTGGATACTGCTAGACTTGAGTACAGGAGGGGTAAGCGGAATTCCAGGTGTAGAGGTGAAATTCGTAGATATCTGGAGGAACAACGGCGGCGAAGGCGGCTTACTGGACTGTTACTGACACTGAGATGCGAAAGTGTGGGGAG…
2647bc045c10c697321d98643e1a032c	D_0__Bacteria;D_1__Bacteroidetes;D_2__Bacteroidia;D_3__Bacteroidales	TGAGGAATATTGGGCAATGGACGCAAGTCTGACCCAGCCATGCCGCGTGCAGGATGACAGCCCTATGGGTTGTAAACTGCTTTTGTACAAGAAGAAACCTGCGATCGTGATCGTAGTTGACGGTACTGTACGAATAAGCATCGGCTAACTCCGTGCCAGCAGCCGCGGTAATACGGAGGATGCAAGCGTTATCCGGATTTATTGGGTTTAAAGGGTGTGTAGGCGGGACAATAAGTCAGCGGTGAAATCTCTCGGCTTAACCGGGAAACTGCCATTGATACTGTTGTCCTTGAGTACAGTTGAGGTGGGCGGAATGTGTAATGTAGCGGTGAAATGCTTAGATATTACACAGAACGCCAATTGCGAAGGCAGCTCACTAAACTGTTACTGACGCTGAGG…
e0405d1742fe1676e52bd015d8f175a9	D_0__Bacteria;D_1__Proteobacteria;D_2__Deltaproteobacteria;D_3__Myxococcales;D_4__Sandaracinaceae;D_5__uncultured;D_6__bacterium enrichment culture clone 33(2013)	TTGGGAATCTTGCGCAATGGCCGAAAGGCTGACGCAGCGACGCCGCGTGGGGGATGAAGGCCTTCGGGTCGTAAACCCCTGTTGGTGGGGAAGATGATGACGGTACCTCCTTAGCAAGCACCGGCTAACTCTGTGCCAGCAGCCGCGGTAATACAGAGGGTGCAAACGTTGCTCGGATTTACTGGGCGTAAAGCGCGTGTAGGCGGACTCGCAAGTCGGTTGTGAAATCCCTGGGCTCAACCTAGGAACTGCATCCGAAACTGCTTGTCTTGAGTAATGGAGAGGGTGGCGGAATTCCCGGTGTAGAGGTGAAATTCGTAGATATCGGGAGGAACATCAGTGGCGAAGGCGGCCACCTGGACATTTACTGACGCTGAGACGCGAAAGCGTGGGGAGCAA…
daaf2a64486dca29156226f0117edb7b	D_0__Bacteria;D_1__Proteobacteria;D_2__Alphaproteobacteria;D_3__Rhodospirillales;D_4__uncultured	TGGGGAATATTGGACAATGGAGGAAACTCTGATCCAGCCATGCCGCGTGAATGATGAAGGCCTTCGGGTTGTAAAATTCTTTTAGTAGGGAAGATGATGACTGTACCTACAGAATAAGCTCCGGCTAACTTCGTGCCAGCAGCCGCGGTAATACGAAGGGAGCTAGCGTTGTTCGGAATTACTGGGCGTAAAGGGTGCGTAGGCGGCCTAATTAGTCAGATGTGAAAGCCCCGGGCTCAACCTGGGAACTGCGTTTGATACTGTTAGGCTAGAATTCGGTAGAGGTGAGTGGAATTCCCAGTGTAGAGGTGAAATTCGTAGATATTGGGAAGAACACCAGTGGCGAAGGCGGCTCACTGGACCGACATTGACGCTGAGGCACGAAAGCGTGGGGAGCGA…
6662c9c1296b9cba3ee6722e9ff47937	D_0__Bacteria;D_1__Proteobacteria;D_2__Alphaproteobacteria;D_3__Thalassobaculales;D_4__uncultured	TGGGGAATATTGGACAATGGGCGCAAGCCTGATCCAGCCATGCCGCGTGAGTGAAGAAGGCCCTAGGGTTGTAAAGCTCTTTCACCCGCGAAGATAATGACGGTAGCGGGAGAAGAAGCCCCGGCTAACTCCGTGCCAGCAGCCGCGGTAATACGGAGGGGGCAAGCGTTGTTCGGAATTACTGGGCGTAAAGGGCGCGTAGGCGGTCTGTTGCGTCAGGTGTGAAAGCCCCGGGCTCAACCTGGGAGGTGCACTTGATACGGGCAGGCTAGAATCCGGGAGAGGATGGTGGAATTCCCAGTGTAGAGGTGAAATTCGTAGATATTGGGAAGAACACCGATGGCGAAGGCAGCCATCTGGACCGGTATTGACGCTGAGGCGCGAAAGCGTGGGGAGCAA…
61af9cb168ac3524c4297b41f21decbe	D_0__Bacteria;D_1__Bacteroidetes;D_2__Bacteroidia;D_3__Chitinophagales;D_4__Saprospiraceae;D_5__uncultured;D_6__uncultured bacterium	TAAGGAATATTGGACAATGGAGGAAACTCTGATCCAGCCATCCCGCGTGTAGGATGACTGCCCTATGGGTTGTAAACTACTTTTACCAGGGAAGAATAGCACTAACTTGTTAGTGTATGACGGTACCTGAGGAATAAGCACCGGCTAACTCCGTGCCAGCAGCCGCGGTAATACGGAGGGTGCAAGCGTTATCCGGAATCACTGGGTTTAAAGGGTGCGTAGGCGGCTATGTAAGTCAGAGGTGAAAGGCCACAGCTTAACTGTGGGACTGCCTTTGATACTGCGTAGCTTGAATTAGGTTGAGGTTGGCGGAATGTGACAAGTAGCGGTGAAATGCATAGATATGTCATAGAACACCAATTGCGAAGGCAGCTGACTAGACCTATATTGACGCTGAGG…
0893df88ce0dd0ab8dcd5a8a26c0b175	D_0__Bacteria;D_1__Cyanobacteria;D_2__Oxyphotobacteria;D_3__Chloroplast;D_4__Virgulinella fragilis;D_5__Virgulinella fragilis;D_6__Virgulinella fragilis	TGGGGAATTTTCCGCAATGGGCGAAAGCCTGACGGAGCAATACCGCGTGAGGGAAGACGGCCTATGGGTTGTAAACCTCTTTTTTCAGGGAGGAATCAATGACGTGTACCTGAAGAATAAGCATCGGCTAACTCCGTGCCAGCAGCCGCGGTAAGACGGAGGATGCAAATGTTATCCGGAATCACTGGGCGTAAAGCGTCGGTAGGTTGTTAAACAAGTCAACTGTTAAATCTTGAGGCTTAACTTCAAAATCGCAGTCGAAACTGTTTGACTAGAGTATAGTAGGGGTAAAGGGAATTTCCAGTGGAGCGGTGAAATGCGTAGATATTGGAAAGAACACCGATGGCGAAGGCACTTTACTGGGCTATTACTGACACTCAGAGACGAAAGCTAGGGTAG…
be1ef5a56b01c7f10f9ce062e76c7f3d	D_0__Bacteria;D_1__Planctomycetes;D_2__Planctomycetacia;D_3__Pirellulales;D_4__Pirellulaceae;D_5__uncultured;D_6__uncultured bacterium	TCGAGAATCTTCGGCAATGGGCGCAAGCCTGACCGAGCGACGCCGCGTGCGGGATGAAGGCCTTCGGGTTGTAAACCGCTGTCAGAGGGGAGGAAATGCATGAGGGTTCTCTCTCATGTTTGACCTATCCTCAGAGGAAGTACGGGCTAAGTTCGTGCCAGCAGCCGCGGTAATACGAACCGTACGAACGTTATTCGGAATCACTGGGCTTAAAGAGTGCGTAGGCGGCTTGGAAAGTTGGGTGTGAAAGCCCAGGGCTCAACCTTGGAACTGCATTCAATACTGTCAGGCTAGAGTACGGTAGAGGGAGGTAGAATTCCACGTGTAGCGGTGAAATGCGTAGAGATGTGGAGGAATACCAGTGGCGAAGGCGGCCTCCTGGATCGATACTGACGCTGA…
3a4fe9f9c519346bb50c7e5e1cbd3d43	D_0__Bacteria;D_1__Proteobacteria;D_2__Alphaproteobacteria;D_3__Rhizobiales;D_4__Methyloligellaceae;D_5__uncultured;D_6__uncultured bacterium	TGGGGAATATTGCACAATGGGCGCAAGCCTGATGCAGCCATGCCGCGTGAGTGAAGAAGGCCTTAGGGTTGTAAAACTCTTTCACCGGTGAAGATAATGACGGTAGCCGGAGAAGAAGCCCCGGCCAACTCCGTGCCAGCAGCCGCGGTAATACGGAGGGGGCTAGCGTTGTTCGGAATTACTGGGCGTAAAGCGCACGTAGGCGGACTGATAAGTTGGGGGTGAAATCCCAAGGCTCAACCTTGGAACTGCCCTCGAAACTGTCAGTCTTGAGTCCGGAAGAGGTGAGTGGAATTCCTAGTGTAGAGGTGAAATTCGTAGATATTAGGAAGAACACCAGTGGCGAAGGCGGCTCACTGGTCCGGTACTGACGCTGAGGTGCGAAAGCGTGGGGAGCAA…
8b135f947e50047cb6ac1dd0beaff5d3	D_0__Bacteria;D_1__Proteobacteria;D_2__Deltaproteobacteria;D_3__Sva0485	TGAGGAATATTGCGCAATGGGGAAACCCTGACGCAGCAACGCCGTGTGAGTGATGAAGGCCTTCGGGTCGTAAAGCTCTGTTAGGAGGGAAGAATAGTTCGTGACGAATAGTCACGATCTTTGACGGTACCTCCAGAGGAAGCACCGGCCAACTCCGTGCCAGCAGCCGCGGTAATACGGAGGGTGCAAGCGTTGTTCGGAATTACTGGGCGTAAAGAGCGTGTAGGCGGTTAGGAAAGTCAGATGTGAAAGCCCTGGGCTCAACCCAGGAAGTGCATTTGAAACTGTCTGACTTGAGTACGGGAGAGGAGAGGGGAATTCCCGGTGTAGAGGTGAAATTCGTAGATATCGGGAGGAATACCGGTGGCGAAGGCGCCTCTCTGGACCGATACTGACGCT…
d1c250bac14780fe6c45bb1e2e6c140f	D_0__Bacteria;D_1__Proteobacteria;D_2__Gammaproteobacteria;D_3__HOC36;D_4__uncultured sediment bacterium;D_5__uncultured sediment bacterium;D_6__uncultured sediment bacterium	TGGGGAATATTGGACAATGGGGGCAACCCTGATCCAGCAATGCCGCGTGTGTGAAGAAGGCCTGCGGGTTGTAAAGCACTTTCAGTGGGGAAGAGGGTGGATGAGTAACGATCGTTCATTGACGTTACCCACAGAAGAAGCACCGGCTAACTCCGTGCCAGCAGCCGCGGTAATACGGAGGGTGCAAGCGTTAATCGGAATTACTGGGCGTAAAGCGCGCGTAGGCGGCTGAGTAAGTCAGATGTGAAAGCCCTGGGCTCAACCTGGGAATGGCATTTGAGACTGCTCGACTAGAGTCTGTCAGAGGGTGGCGGAATTCCGGGTGTAGCGGTGAAATGCGTAGATATCCGGAGGAACACCGGTGGCGAAGGCGGCCACCTGGGACAAGACTGACGCTGA…
1ccbc6ce4b5a855bd7aa8b2c07de851f	D_0__Bacteria;D_1__Chloroflexi;D_2__Anaerolineae;D_3__SBR1031;D_4__metagenome;D_5__metagenome;D_6__metagenome	TGAGGAATCTTGCGCAATGGGGGAAACCCTGACGCAGCGACACCGCGTGCGGGAGGAAGGCCTTCGGGTTGTAAACCGCTTTTCTGGAGGACGAGGAAGGACGGTACTCCAGGAATAAGTCCCGGCTAACTACGTGCCAGCAGCCGCGGTAAAACGTAGGGGGCGAGCGTTATCCGGAATTACTGGGCGTAAAGGGCGTCTAGGCGGCAGCCTAAGTCCTATGTGAAAGCTCCCGGCTCAACTGGGAGAGGGCATGGGAAACTGGGTGGCTCGAGACTCGGAGGGGGGTGCGGAATTCCCGGTGGAGTGGTGAAATGCGTTGAGATCGGGAGGAACACCAGTAGCGAAGGCGGCACCCTGGCCGAGGTCTGACGCTGAAGCGCGACAGCGTGGGGAGCG…
ba0f9dd48942404bf992bc3b347ad119	D_0__Bacteria	CTAAGAATCTTCCGCAATGGGCGAAAGCCTGACGGAGCGACGCCGCGTGCATGATGAATGCCCTTCGGGTTGTAAAGTGCTTTTTCATGGGAGGATGGGTAGACTTTAGGTTTATCTGACGTTACCATGCGAATAAGCCCCGGCTAATTCCGTGCCAGCAGCCGCGGTAATACGGAAGGGGCGGGCGTTGTTCGGATTTATTGGGCGTAAAGGGAGCGCAGGCGGCTTTGTAAGTGGGACTTTTCAGCGTCGGGCTTAACCCGGCGATTGGTGCCAAACTGCAAAGCTCGAGTCCGCTAGAGGGTACTGGAATTCCCGGTGTAGGAGTGAAATCTATAGATATCGGGAGGAACACCAATTGCGAAGGCAGGTGCCTGGGGCTGGACTGACGCTGAGGCT…
6caae341d61b313080da2f828ed171e2	D_0__Bacteria;D_1__Proteobacteria;D_2__Gammaproteobacteria	TGGGGAATATTGGACAATGGGCGAAAGCCTGATCCAGCAATGCCGCGTGTGTGAAGAAGGCCTGCGGGTTGTAAAGCACTTTCAGATGGGAAGATAATGACGGTACCATCAGAAGAAGCACCGGCTAACTCTGTGCCAGCAGCCGCGGTAATACAGAGGGTGCAAGCGTTAATCGGAATTACTGGGCGTAAAGCGCGCGTAGGCGGTTTGTTAAGTCGGATGTGAAAGCCCTGGGCTCAACCTGGGAACTGCATTCGATACTGGCTAACTAGAGTGCGAGAGAGGGAGGTAGAATTCCATGTGTAGCGGTGAAATGCGTAGATATGTGGAGGAATACCGGTGGCGAAGGCGGCCTCCTGGCTCGACACTGACGCTGAGGTGCGAAAGCGTGGGGAGCAA…
8b25b47227f01f6cedb07e654c1672b8	D_0__Bacteria;D_1__Patescibacteria;D_2__Gracilibacteria;D_3__uncultured bacterium;D_4__uncultured bacterium;D_5__uncultured bacterium;D_6__uncultured bacterium	TGAGGAATATTGCGCAATGGGGGCAACCCTGACGCAGCGACGCCGCGTGGATGATGAAGGCCTTCGGGTTGTAAACACCTTTTCTGGGGGAAGAAAATCTGACGGTACCCCAGGAATAAGGACCGGCTAATTACGTGCCAGCAGCCGCGGTAATACGTAAGGTCCAAGCGTTATCCGGAATTATTGGGCGTAAAGCGTCCGCAGGTTGTTTGTTAAGTGGATTATGAAATACCGGAGCTCAACTTCGGTGCTGTACTCCAAACTGGCAAACTAGAGGTATGGAGAGGTGCGTGGAATTGTACAAGTAGGGGTAAAATCCGTAGATATGTACAGGAACACCAAAAGCGAAGGCAGCGCACTGGCCATTACCTGACACTCAGGGACGAAAGCGTGGGGAGC…
2ce51d37911ff27472e0970fcd09e45b	D_0__Bacteria;D_1__Planctomycetes;D_2__Phycisphaerae;D_3__Phycisphaerales;D_4__Phycisphaeraceae;D_5__Phycisphaera;D_6__uncultured bacterium	TAACGAATATTCCGCAATGCGCGAAAGCGTGACGGAGCAATGCCGCGTGTAGGATGAAGCATCTAGGTGTGTAAACTACTGTCAGGGACTAGGAATTTTGACCAATCCCAAAGGAAGAGCCGGCTAACTCTGTGCCAGCAGCCGCGGTAATACAGAGGGCTCAAGCGTTAATCGGAATCACTGGGCTTAAAGGGTCCGCAGGCGGACCGGTAAGTATTTTGTGAAAGACCATGGCTCAACCATGGCATTGCTTAATAAACTACCGGTCTTGAGCATATTAGAGGTCATCGGAACAGTAGGTGGAGCGGTGAAATGCGTAGATATCTACTGGAACGCCAACGGAGAAGTCAGATGACTGGGATATTGCTGACGCTCAGGGACGAAAGCGTGGGTAGCGAA…
65b309650bbcf5067651ff4199ea3e49	D_0__Bacteria;D_1__Planctomycetes;D_2__Planctomycetacia;D_3__Pirellulales;D_4__Pirellulaceae;D_5__Pir4 lineage;D_6__uncultured planctomycete	TCGAGAATCTTCCGCAATGGACGCAAGTCTGACGGAGCGACGCCGCGTGTGGGATGAAGGCCTTCGGGTTGTAAACCGCTGTCAGTTGGGAGGAAATCTATGGGGGTTATCCCCCATGGTTGACCTATCTTCAGAGGAAGGGCGGGCTAAGTTCGTGCCAGCAGCCGCGGTAAGACGAACCGCCCAAACGTTATTCGGAATCACTGGGCTTAAAGGGTGCGTAGGCGGCTTGGCAAGTTGGGTGTGAAATCCTGGAGCTCAACTCCAGAATTGCGCTCAAAACTGCCAGGCTTGAGGAAAGTAGGGGTGAGCGGAACTGATGGTGGAGCGGTGAAATGCGTTGATATCATCAGGAACACCTGTGGCGAAAGCGGCTCACTGGACTTTTTCTGACGCTGA…
c3840bb84524b6fc8606c1ef750bc1f0	D_0__Bacteria;D_1__Firmicutes;D_2__Clostridia;D_3__Clostridiales;D_4__Clostridiaceae 1;D_5__Clostridium sensu stricto 9;D_6__uncultured bacterium	TGGGGAATATTGCACAATGGGCGAAAGCCTGATGCAGCAACGCCGCGTGAGTGATGAAGGCCTTCGGGTTGTAAAGCTCTGTCTTTGGGGACGATAATGACGGTACCCAAGGAGGAAGCCACGGCTAACTACGTGCCAGCAGCCGCGGTAATACGTAGGTGGCAAGCGTTGTCCGGATTTACTGGGCGTAAAGGATGCGTAGGTGGATATGCAAGTCAGATGTGAAATACCCGGGCTCAACTCGGGTGCTGCATTTGAAACTATATATCTAGAGTGCAGGAGAGGTAAGTGGAATTCCTAGTGTAGCGGTGAAATGCGTAGAGATTAGGAAGAACACCAGTGGCGAAGGCGACTTACTGGACTGTAACTGACACTGAGGCATGAAAGCGTGGGGAGCAA…
7077a1263e1a604515a7d94ad9756704	D_0__Archaea;D_1__Euryarchaeota;D_2__Thermococci;D_3__Methanofastidiosales;D_4__uncultured;D_5__uncultured archaeon;D_6__uncultured archaeon	CAGCGAAACCTTTACAATGCACGAAAGTGTGATAAGGGAATTCCAAGTGTGCATATACCATATGCACTTTTCTTTAGTGTAAAGAGCTAGAGGAATAAGGGGTGGGTAAGACTAGTGCCAGCCGCCGCGGTAAAACTAGCATCCCAAGTGGCAGTCACCATTACTGGGCTTAAAGCGTCCGTAGCTTGTTTTGAAAGTCTCTGCTGAAATCCTGCGGCTTAACCGTAGGGCTTGGCGGAGAAACTCCAAGACTAGAGGACAGGAGAGGTCGGGGGTACTTCTGGGGTAGGGGTGAAATCCTATAATCCTAGAAGGACCAACAGTGGCGAAGGCGCCCGACATGAATGTGCCTGACAGTGAGGGACGAGAGCCAGGGTCGCGAAGC
82d17516a531b130bf5c71a9a014c5cd	D_0__Bacteria;D_1__Fibrobacteres;D_2__Chitinivibrionia;D_3__Chitinivibrionales;D_4__Chitinivibrionaceae;D_5__possible genus 03	TAGGGAATCTTGCGCAATGGACGAAAGTCTGACGCAGCAACTCCGCGTGGAGGATGACGGTTTTCGGATTGTAAACTCCTTTTATTTGGGAAGAACATACTTATGGTAACATAAGGATTGACGGTACCATTTGAATAAGCAACGGCTAAATACGTGCCAGCAGCCGCGGTAATACGTATGTTGCAAGCGTTATTCGGAATCACTGGGCGTAAAGAGTTCGTAGGCGGACTTTCAAGTCAGAGGTGAAATTTTGGGGCTTAACCCCGAAACTGCCTTTGAAACTGTTAGTCTTGAGTATGTGAGGGGATGATGGAATTCCAGGTGTAGCGGTGGAATGCGTAGATATCTGGAAGAACACCGGTGGCGAAGGCGGTCATCTGGCACAATACTGACGCTGAG…
59764b079e7db2886a34e92f2b9e2bf6	D_0__Bacteria;D_1__Proteobacteria;D_2__Alphaproteobacteria;D_3__Rickettsiales;D_4__Mitochondria;D_5__uncultured alpha proteobacterium;D_6__uncultured alpha proteobacterium	TGGGGAATATTGGACAATGGACGAAAGTCTGATCCAGCAATACCGCGTGGACGATGAAGGCCTTAGGGTTGTAAAGTCCTTTCAGTAGGGAAGATAACGACGGTACCTACAGAAGAAGCACCGGCTAACTCCGTGCCAGCAGCCGCGGTAATACGGAGGGTGCTAGCGTTGTTCGGAATTATTGGGCGTAAAGCGTACGTAGGCTGTTTTGTAAGTCAGTTGTGAAATCCCAAGGCTCAACCTTGGAACTGCAATTGAAACTGCATAACTAGAGTATTATTGGAGATGGCAGAATTCCTAGTGTGGGGGTGAAATCCGTAGATATTAGGAGGAATACCAGTGGTGAAGACGGCTATCTTGATAGTAACTGACGCTAAGGTACGAAGGTATGGGTAGCGA…
085586d7136978215aceb48b1ed95e3c	D_0__Bacteria;D_1__Lentisphaerae;D_2__Oligosphaeria;D_3__SS1-B-02-17	TCGAGAATCTTCCGCAATGCGCGAAAGCGTGACGGAGCAATGCCGCGTGCAGGATGAAGGCCCTCGGGTCGTAACTGCTGTCACTCGGGAAAAATTTGATGGTACCGAGAGAGGAAGCACCGGCTAACTACGTGCCAGCAGCCGCGGTAATACGTAGGGTGCGAGCGTTATTCGGATTTATTGGGCGTAAAGGGTTCGTAGGGGGTTGTGTAAGTCTGAAGTGAAATCCTGTGGCTCAACCACAGAACTGCTTTGGATACTGCACGACTAGAGTACTGGAGAGGCAAGCAGAATTCCTGGTGTAGCGGTGGAATGCGTAGATATCAGGAGGAATACCAATAGCGAAGGCAGCTCGCTGGACAGTTACTGACCCTGAGGAACGAAAGCTAGGGGAGCGAA…
30d4f9afb689824cfd085649d43a26fe	D_0__Bacteria;D_1__Proteobacteria;D_2__Deltaproteobacteria;D_3__Myxococcales;D_4__Sandaracinaceae;D_5__uncultured	TGGGGAATCTTGGACAATGGGCGCAAGCCTGATCCAGCCATGCCGCGTGTGTGATGAAGGCCCTAGGGTCGTAAAGCACTTTCGCTAGAGATGATAATGACAGTATCTAGTAAAGAAGTCCCGGCTAACTCCGTGCCAGCAGCCGCGGTAATACAGAGGGTGCAAACGTTGCTCGGATTTACTGGGCGTAAAGCGCGTGTAGGCGGACTCGCAAGTCGGTTGTGAAATCCCTGGGCTCAACCTAGGAACTGCATCCGAAACTGCTTGTCTTGAGTAATGGAGAGGGTGGCGGAATTCCCGGTGTAGAGGTGAAATTCGTAGATATCGGGAGGAACATCAGTGGCGAAGGCGGCCACCTGGACATTTACTGACGCTGAGACGCGAAAGCGTGGGGAGCAA…
bfedc71e26928650e0fcfd07e7231125	D_0__Bacteria;D_1__Proteobacteria;D_2__Gammaproteobacteria;D_3__Cellvibrionales;D_4__Halieaceae	TGGGGAATATTGCACAATGGAGGAAACTCTGATGCAGCAACGCCGCGTGGAGGATGACGCATTTCGGTGTGTAAACTCCTTTTATATGGGAAGATAATGACGGTACCATCAGAAGAAGCACCGGCTAACTCTGTGCCAGCAGCCGCGGTAATACAGAGGGTGCAAGCGTTAATCGGAATTACTGGGCGTAAAGCGCGCGTAGGCGGTTTGTTAAGTCGGATGTGAAAGCCCCGGGCTCAACCTGGGAACTGCATTCGATACTGGCAGACTTGAGTACGGGAGAGGGAGGTAGAATTCCACGTGTAGCGGTGAAATGCGTAGATATGTGGAGGAATACCGGTGGCGAAGGCGGCCTCCTGGCCTGATACTGACGCTGAGGTGCGAAAGCGTGGGGAGCAA…
0b70946a54e47628881766657a7162b6	D_0__Bacteria;D_1__Bacteroidetes;D_2__Bacteroidia;D_3__Bacteroidales;D_4__Prolixibacteraceae;D_5__Draconibacterium;D_6__uncultured bacterium	TGAGGAATATTGGTCAATGGGCGAGAGCCTGAACCAGCCATCCCGCGTGCAGGATGACGGCCCTACGGGTTGTAAACTGCTTTTCTATGCCAAGAAACCCACCTACGTGTAGGTGGTTGCCGGTAGCATAGGAATAAGCATCGGCTAACTCCGTGCCAGCAGCCGCGGTAATACGGAGGATGCAAGCGTTATCCGGATTCATTGGGTTTAAAGGGTGCGCAGGCGGGCTTGTAAGTCAGTGGTGAAATACTGCCGCTCAACGGTAGAACTGCCATTGATACTGCAAGTCTTGAATATGGTTGAGGTAGGCGGAATGTGTCGTGTAGCGGTGAAATGCATAGATATGACACAGAACGCCGATTGCGAAGGCAGCTTACTAAGCCATTATTGACGCTGAGG…
678d4bbc91b0ad2808e63f429e4f5d37	D_0__Archaea;D_1__Asgardaeota;D_2__Odinarchaeia;D_3__uncultured archaeon;D_4__uncultured archaeon;D_5__uncultured archaeon;D_6__uncultured archaeon	GCGCGAAACCTCCGCAATGCACGAAAGTGTGACGGGGCCATCCCAAGTGCCATCCGATAAGGGTGGCTTTTGCCCAGTGTAAATAGCTGGGAGAATGAGGGGAGGGCAAGGCTGGTGCCAGCCGCCGCGGTAAAACCAGCTCCTCGAGTAGTCGGGAGGATTACTGGGTCTAAAGCGTCCGTAGCCGGCCCTGTAAGTTCCTGGTAAAATCCAGCGGCTTAACCGTTGGTCTGCTGGGGATACTGCAGGGCTTGGGAATCAGAGAGGCCAAGGGTACTTATGGGGTAGGGGTGAAATCCTGTAATCCCATAGGGACCACCGGTGGCGAAGGCGCTTGGCTGGAAGATGTCCGACGGTGAGGGACGAAAGCCAGGGGAGCGAACC
d437b929c891a489c69bcf3d02aa319d	D_0__Bacteria;D_1__Bacteroidetes;D_2__Bacteroidia;D_3__Flavobacteriales;D_4__Flavobacteriaceae;D_5__Pseudofulvibacter;D_6__uncultured bacterium	TGAGGAATATTGGACAATGGAGGCAACTCTGATCCAGCCATGCCGCGTGAAGGATGACTGCCCTATGGGTTGTAAACTTCTTTTATATAGGAAGAAGCAGTTTCTCGTGGGAAACCTTGACGGTACTATATGAATAAGCACCGGCTAACTCCGTGCCAGCAGCCGCGGTAACACGGAGGGTGCAAGCGTTATCCGGAATCATTGGGTTTAAAGGGTCCGTAGGCGGATTAATAAGTCAGAGGTGAAATCCTGCAGCTCAACTGTAGAACTGCCTTTGATACTGTTAGTCTTGAGTTATTGTGAAGTGGTTAGAATATGTAGTGTAGCGGTGAAATGCATAGAGATTACATAGAATACCAATTGCGAAGGCAGATCACTAACAATATACTGACGCTGATG…
260fedf68c8c927943dce00d17dca01c	D_0__Bacteria;D_1__Planctomycetes;D_2__Planctomycetacia;D_3__Pirellulales;D_4__Pirellulaceae;D_5__Rhodopirellula	TCGAGAATCTTCCGCAATGGGCGAAAGCCTGACGGAGCAACGCCGCGTGCGGGATGAAGGCCTTCGGGTTGTAAACCGCTGTCAGTGGGGAGGAAATGCATAAGGGTTCTCTCTTATGTTTGACCGATCTTCAGAGGAAGTCCGGGCTAAGTTCGTGCCAGCAGCCGCGGTAAGACGAACCGGACGAACGTTATTCGGAATCACTGGGCTTAAAGAGTGCGTAGGCGGCTTTGTAGGTGAGGTGTGAAATCCCACGGCTCAACCGTGGAACTGCGCTTCAAACCACAAGGCTTGAGGGAGGCAGAGGTAAGCGGAACTGATGGTGGAGCGGTGAAATGCGTTGATATCATCAGGAACACCAGTGGCGAAGGCGGCTTACTGGGCCTCTACTGACGCTGA…
2c252126f3a0fd92ba18bfd8a129847b	D_0__Bacteria;D_1__Spirochaetes;D_2__Spirochaetia;D_3__Spirochaetales;D_4__Spirochaetaceae;D_5__uncultured;D_6__Ruditapes philippinarum	CTAAGAATATTCCGCAATGGACGAAAGTCTGACGGAGCAATCCCACGTGAAGGATGAAGGCCCTCGGGTTGTAAACTTCTTTCGGCAAGGGAGAATAAGCTATCAGGAAATGGATAGTGATGACGGTACTTGCAGAAGAAGCACCGACTAATTACGTGCCAGCAGTCGCGGTAATACGTAAGGTGCAAACGTTGTTCGGAATTACTGGGCGTAAAGGGTACGTAGGTGGTCATGTAAGTTAGTGGTGAAATCTCGGGGCTTAACCCCGAGTCTGCCATTAAAACTGCATGACTTGAGTTGTAATAGGGGTGGCAGGAATTCCTGGTGTAGGAGTGAAATCTGTAGATATCAGGAGGAACACCAATAGCGAAGGCAAGCCACTGGGCTACAACTGACACT…
866aab6020c9eb94db1b7090a88dc807	D_0__Bacteria;D_1__Actinobacteria;D_2__Acidimicrobiia;D_3__Microtrichales;D_4__Microtrichaceae;D_5__Sva0996 marine group;D_6__uncultured organism	TAGGGAATCTTGCACAATGGGCGAAAGCCTGATGCAGCGACGCCGCGTGGGGGATGAAGGCCTTCGGGTTGTAAACCCCTTTCAGTAGGGACGAAAATGACGGTACCTACAGAAGAAGCTCCGGCCAACTACGTGCCAGCAGCCGCGGTAACACGTAGGGAGCAAGCGTTGTCCGGATTTATTGGGCGTAAAGAGCTCGTAGGTGGTTCAGTAAGTCGGATGTGAAAACTCAAGGCTCAACCTAGAGACGCCATCCGATACTGCTGTGGCTTGAGTTCGGTAGAGGAGTGTGGAATTCCTGGTGTAGAGGTGAAATTCGTAGAGATCGGGAGGAACACCGGTGGCGAAGGCGACACTCTGGACGAATACTGACGCTGAGGCGCGAAAGCGTGGGGAGCA…
90904c250eee754ecf15f28bf24a2bce	D_0__Bacteria;D_1__Chloroflexi;D_2__Anaerolineae;D_3__ADurb.Bin180;D_4__uncultured bacterium;D_5__uncultured bacterium;D_6__uncultured bacterium	TGAGGAATATTGCGCAATGGGCGAAAGCCTGACGCAGCAACGCCGCGTGGGCGATGAAGGTCTTCGGATTGTAAAGCCCTTTTCTGGGGGAAGAGGAAGGACGGTACCTCAGGAATAAGCCTCGGCTAACTACGTGCCAGCAGCCGCGGTAAAACGTAGGAGGCAAGCGTTATCCGGATTTATTGGGCGTAAAGCGCCAGCAGGCGGTGTCTTAAGTTGGACGTGAAATCTTCTGGCTCAACTGGAAGGGGCCGTTCAATACTGAGACACTTGAGGGCAGGAGAGGGAAGTAGAATTCCCGGTGTAGTGGTGGAATGCGCAGATATCGGGAGGAATACTAGTGGCGAAGGCGGCTTCCTGGCCTGTTTCTGACGCTCAGTGGCGAAAGCTAGGGTAGCG…
f37ce30e46943baa7ea1392915022ae1	D_0__Bacteria;D_1__Planctomycetes;D_2__Planctomycetacia;D_3__Pirellulales;D_4__Pirellulaceae;D_5__uncultured;D_6__uncultured bacterium	TCGAGAATCTTCCGCAATGGGCGCAAGCCTGACGGAGCGACGCCGCGTGTGGGATGAAGGCCTTCGGGTTGTAAACCGCTGTCAGAGGGGAGTAAGTGAAGGGGGTCATCCCCTGGATCTGAACTATCCTCAGAGGAAGGACGGGCTAAGTTCGTGCCAGCAGCCGCGGTAAGACGAACCGTCCAAACGTTATTCGGAATCACTGGGCTTAAAGGGTGCGTAGGCGGCTCTGCAAGTTGGGTGTGAAAGCCCACGGCTCAACCGTGGAATTGCGCTCAAAACTGCAGGACTGGAGGGAGATAGAGGTGAGCGGAACTTATGGTGGAGCGGTGAAATGCGTTGATATCATAAGGAACACCGGTGGCGAAGGCGGCTCACTGGGTCTCTTCTGACGCTGAG…
6605f7e0688142919c21af3208cb7a05	D_0__Bacteria;D_1__Planctomycetes;D_2__Planctomycetacia;D_3__Pirellulales;D_4__Pirellulaceae;D_5__uncultured	TCGAGAATCTTCCGCAATGGGCGAAAGCCTGACGGAGCGACGCCGCGTGCGGGATGAAGGCCTTCGGGTTGTAAACCGCTGTCAGAGGGGAGTAAGTGAAGGGGGTTATCCCCTGGATCTGAACTATCCTCAGAGGAAGGACGGGCTAAGTTCGTGCCAGCAGCCGCGGTAAGACGAACCGTCCAAACGTTATTCGGAATCACTGGGCTTAAAGGGTGCGTAGGCGGCCCTGCAAGTTGGGTGTGAAAGCCCACGGCTCAACCGTGGAATTGCGCCCAAAACTGCAGGACTTGAGGGAGACAGAGGTGAGCGGAACTTATGGTGGAGCGGTGAAATGCGTTGATATCATAAGGAACACCGGTGGCGAAGGTGGCTCACTGGGTCTCTTCTGACGCTGAG…
c65b5c85d8bcc5f87611634a67e2d948	D_0__Bacteria;D_1__Bacteroidetes;D_2__Bacteroidia;D_3__Bacteroidales;D_4__Bacteroidetes BD2-2;D_5__uncultured bacterium;D_6__uncultured bacterium	TGAGGAATATTGGGCAATGGACGCAAGTCTGACCCAGCCATGCCGCGTGCAGGAATACGGCTCTAGTAGTTGTAAACTGCTTTTATACGGGAAGAATGCTCTACTTTAGTAGAGAGAGACCGTACCGTACGAATAAGGATCGGCTAACTCCGTGCCAGCAGCCGCGGTAATACGGAGGATCCAAGCGTTATCCGGATTTATTAGGTTTAAAGGGTACGTAGGCGGAACCTTAAGTCAGTGGTGAAATCTTGCAGCTTAACTGTAAAATAGCCATTGAAACTGAAGTTCTTGAGTATAGACGAAGTGGGCGGAATATAACATGTAGCGGTGAAATGCTTAGATATGTTATAGAACACCGATTGCGAAGGCAGCTCACTAGACTATTACTGACGCTGATGT…
555abdbba4c73592e886f45b86ac8a37	D_0__Bacteria;D_1__Proteobacteria;D_2__Alphaproteobacteria;D_3__Holosporales;D_4__Holosporaceae;D_5__uncultured;D_6__uncultured bacterium	TGGGGAATATTGGACAATGGGGGAAACCCTGATCCAGCAATGCCGCGTGAATGAAGAAGGCCTTAGGGTTGTAAAGTTCTTTCACCTGTGAAGATAATGACGGTAGCAGGAGAAGAAGCCCCGGCTAACTCCGTGCCAGCAGCCGCGGTAAGACGGAGGGGGCTAGCGTTGTTCGGAATGACTGGGCGTAAAGGGCGCGTAGGCGGTTTTTTAAGTGAGGCGTGAAAGCCCTGGGCTTAACCCAGGAGGTGCGTTTCATACTGGAAGACTAGAGTACGAGAGAGGAAAGTGGAATTCCTAGTGTAGAGGTGAAATTCGTAGATATTAGGAAGAACACCAGTGGCGAAGGCGACTTTCTGGCTCGTAACTGACGCTGAGGCGCGAAAGCGTGGGGAGCAA…
81371aa04daf860d5cdac3b93b8433f9	D_0__Bacteria;D_1__Nitrospinae;D_2__Nitrospinia;D_3__Nitrospinales;D_4__Nitrospinaceae;D_5__Nitrospina;D_6__uncultured bacterium	TGGGGAATATTGCGCAATGGGCGAAAGCCTGACGCAGCAACGCCGTGTGAGCGATGAAGGCCTTCGGGTCGTAAAGCTCTGTCAAATGGGAAGAACACTGACGGTACCATTAGAGGAAGCCCCGGCTAACTCCGTGCCAGCAGCCGCGGTAATACGGAGGGGGCAAGCGTTGTTCGGAATTATTGGGCGTAAAGCGTATGTAGGCGGCTGGATAAGTCAGACGTGTAAGCCCACGGCTCAACCGTGGAATTGCGTTTGAAACTATTTAGCTTGAGTATAGGAGAGGAAAGCGGAATTCCCAGTGTAGCGGTGAAATGCATTGATATTGGGAAGAACATCTGTGGCGAAGGCGGCTTTCTGGCCTGTTACTGACGCTGAGATACGAAAGCCAGGGGAGCG…
f56abddafe4596a3676f1a9e72bc4d32	D_0__Bacteria;D_1__Patescibacteria;D_2__Gracilibacteria;D_3__Candidatus Peregrinibacteria;D_4__uncultured organism;D_5__uncultured organism;D_6__uncultured organism	TAAGGAATCTTCCGCAATGGACGAAAGTCTGACGGAGCATCACCGCGTGGTTGATGACGCCTTTAGGGGTGTAAAGACCTTTCCTGAGTGAAGAACTTTGACGGTAACTTAGGAATAAGCACCGGCTAACTCCGTGCCAGCAGCCGCGGTAATACGGAGGGTGCAAGCGTTACCCGGAATCATTGGGCGTAAAGCGTCCGCAGGCGGTATGTTAAGTAAGATGTTAAATTTTGCAGCTCAACTGTAAATCTATGTCTTAAACTGGCAAACTAGAGTATTGGAGAGGTGCGTAGAATTCTGTGTGTAGGGGTAAAATCCGTAGATACACAGAGGAATACCAAAAGCGAAGGCAGCGCACTGGCCAATTACTGACGCTCAGGGACGAAAGCGTGGGTAGCG…
ca2651d0a1b28245700c2cfe932d4759	D_0__Bacteria;D_1__Proteobacteria;D_2__Gammaproteobacteria;D_3__Nitrosococcales;D_4__Nitrosococcaceae;D_5__SZB85;D_6__uncultured bacterium	TTAGGAATTTTGCGCAATGGGGGCAACCCTGACGCAGCAACGCCGCGTGAGTGATGAAGGCTTTCGGGTTGTAAAACTCTTTTCTCAGGGAAGAAAAAAATGACGGTACCTGAAGAAGAAGCACCGGCTAATTCCGTGCCAGCAGCCGCGGTAATACGGAAGGTGCGAGCGTTAATCGGAATTACTGGGCGTAAAGAGTACGTAGGCGGCTTGGTATGTCGGATGTAAAAGCCCCGGGCTCAACCTGGGAATGTCATTCGAAACTGCCAGACTAGAATTCAGTAGAGGAAAGCGGAATTCCCGGTGTAGCGGTGAAATGCGTAGATATCGGGAGGAACACCAGTGGCGAAGGCGGCTTTCTGGACTGAAATTGACGCTGAGGTACGAAAGCGTGGGGAG…
d147044baf2011eae36bb6a73cec95b3	D_0__Bacteria;D_1__Acidobacteria;D_2__Blastocatellia (Subgroup 4);D_3__Blastocatellales;D_4__Blastocatellaceae;D_5__Blastocatella;D_6__uncultured bacterium	TCGGGAATTTTGGGCAATGGGCGAAAGCCTGACCCAGCAACGCCGCGTGAAGGATGAAGTCTTTCGGGATGTAAACTTCGGAAATATAGGAAGAATAAATGACGGTACTATATCTAAGGTCCGGCTAACTACGTGCCAGCAGCCGCGGTAATACGTAGGGACCAAGCGTTGTTCGGATTTACTGGGCGTAAAGGGTGCGTAGGCGGCGTGATAAGTCAATTGTGAAATCTCCGAGCTTAACTCGGAACGGCCAATTGATACTATTGTGCTAGAGTGCAGAAAGGGCAACTGGAATTCTTGGTGTAGCGGTGAAATGCGTAGATATCAAGAGGAACACCTGAGGCGAAGGCGAGTTGCTAGGCTGACACTGACGCTGAAGTACGAAAGCTAGGGGAGCGA…
42fdf96449417f9c66af271f807036e9	D_0__Bacteria;D_1__Firmicutes;D_2__Clostridia;D_3__Clostridiales;D_4__Lachnospiraceae;D_5__uncultured;D_6__uncultured Firmicutes bacterium	TGGGGAATATTGCACAATGGGCGAAAGCCTGATGCAGCAACGCCGCGTGAAGGAAGAAGGTTTTCGGATCGTAAACTTCTATCAGCGAGGAAGATAATGACGGTACTTGACTAAGAAGCCCCGGCTAACTACGTGCCAGCAGCCGCGGTAATACGTAGGGGGCAAGCGTTATCCGGAATTACTGGGTGTAAAGGGTGCGTAGACGGTAACATAAGTCAGATGTGAAAGCCCGAGGCTCAACCTCGGGACTGCATTCGAAACTGTGTAACTAGAGTACAGGAGAGGAAAGTGGAATTCCTAGTGTAGCGGTGAAATGCGTAGATATTAGGAGGAACACCAGTGGCGAAGGCGACTTTCTGGACTGTAACTGACGTTGAGGCACGAAAGCGTGGGGAGCGA…
ca8c96023ca32a74b3a76339c1ddd267	D_0__Bacteria;D_1__Nitrospirae;D_2__Thermodesulfovibrionia;D_3__uncultured;D_4__uncultured bacterium;D_5__uncultured bacterium;D_6__uncultured bacterium	TGGGGAATTTTGCGCAATGGGCGAAAGCCTGACGCAGCGACGCCGCGTGGAGGACGAAGGCCTTTGGGTTGTAAACTCCTTTAGTAGGGGAAGAAGCCTTTCGGGGTGACGGTACCCTAAGAATAAGCCACGGCTAACTCCGTGCCAGCAGCCGCGGTAAGACGGAGGTGGCGAGCGTTGTTCGGATTTACTGGGCTTAAAGGGCGCGTAGGCGGTATGTTAAGTCGAAGGTGGAAGGCATGGGCTCAACCCATGGACAGCCTTCGAAACTGGCGTACTTGAGTCGTGCAGGGGATGGCGGAATTCCAGGTGTAGCGGTGAAATGCGTAGATATCTGGAGGAAGGCCGGTGGCGAAGGCGGCCATCTGGGCACGAACTGACGCTGAGGCGCGAAAGCGT…
b74263b3aeae393be2a17123eb27a35b	D_0__Bacteria;D_1__Planctomycetes;D_2__Phycisphaerae;D_3__CCM11a;D_4__uncultured bacterium;D_5__uncultured bacterium;D_6__uncultured bacterium	CAACGAATATTCCGCAATGGGCGCAAGCCTGACGGAGCGACGCCGCGTGCAGGATGAAGTCTTTCGGGATGTAAACTGCTGTCAGGGGTCAGAAAGAAAGTGATCAACCCCAAAGGAAGCATCGGCTAACTCCGTGCCAGCAGCCGCGGTAATACGGAGGATGCGAGCGTTGTTCGGAATCACTGGGCTTAAAGGGCGTGTAGGCGGGATGTAAGGTGTCTTGTGAAAGCCCCCGGCTCAACCGGGGAATTGCTTGGCAAACCGGCATTCTTGAGGCAGGTAGAGGCGACTGGAACCTTTGGTGGAGAGGTGAAATTCGTAGATATCAAAGGGAACGCCGGTGGCGAAAGCGGGTCGCTGGGCCTGTCCTGACGCTGAGACGCGAAAGCGTAGGGAGCG…
59cdb9d1bbc44b0ba8737e26ebd831fa	D_0__Bacteria;D_1__Chloroflexi;D_2__Anaerolineae;D_3__ADurb.Bin180;D_4__uncultured bacterium;D_5__uncultured bacterium;D_6__uncultured bacterium	TGAGGAATATTGCGCAATGGGCGAAAGCCAGACGCAGCAACGCCGCGTGGGCGATGAAGGTCTTCGGATCGTAAAGCCCTTTTCCAGGGGATGAGGAAGGACAGTACCCTGGGAATAAGTCTCGGCTAACTACGTGCCAGCAGCCGCGGTAAAACGTAGGAGGCTAGCGTTATCCGGATTCATTGGGCGTAAAGCGCGTGCAGGCGGTGTCCTAAGTTGGACGTAAAATCTCTCGGCCTAACTGAGAGGAGCCGTTCAATACTGGGGCACTTGAGGGCGGAAGAGGGAAGTGGAATTCCCGGTGTAGCGATGGAATGCGTAGATATCGGGAGGAACACCTGTGGCGAAAGCGGCTTCCTGGTCCGTTCCTGACGCTAAGACGCGAAAGCTAGGGTAGCA…
194294a4d1aefa63d80b4446e91639b1	D_0__Bacteria;D_1__Proteobacteria;D_2__Deltaproteobacteria;D_3__Myxococcales;D_4__bacteriap25;D_5__uncultured organism;D_6__uncultured organism	TGGGGAATATTGGACAATGGGCGCAAGCCTGATCCAGCAACGCCGCGTGAGTGATGAAGGCCTTCGGGTTGTAAAGCTCTGTCAGAGGGAACGAATAAGGGTGATCCAATACATCACCCGATGACGGTACCCTCAAAGGAAGCACCGGCTAACTCTGTGCCAGCAGCCGCGGTAAGACAGAGGGTGCAAGCGTTGTTCGGAATCACTGGGCGTAAAGGGCGTGTAGGCGGTGAAGTGTGTCTGATGTGAAAGCCCTCGGCTCAACCGGGGAATGGCATTGGAAACTACTTCACTCGAGTACGAGAGAGGGTGGCGGAATTCCTAGTGTAGAGGTGAAATTCGTTGATACTAGGAGGAACACCTGAGGCGAAGGCGGCCACCTGGCTCGTAACTGACGCT…
5a30ae4f1310ac1927683b0f52cfd253	D_0__Bacteria;D_1__Cyanobacteria;D_2__Oxyphotobacteria;D_3__Chloroplast;D_4__Minutocellus sp. CCMP1701;D_5__Minutocellus sp. CCMP1701;D_6__Minutocellus sp. CCMP1701	TGGGGAATTTTCCGCAATGGGCGAAAGCCTGACGGAGCAATACCGCGTGAGGGATGACTGCCTATGGGTTGTAAACCTCTTTTCTCAGGGAGGAAATCAATGACGTTACCTGAGGAATAAGCATCGGCTAACTCCGTGCCAGCAGCCGCGGTAAGACGGAGGATGCAAGTGTTATCCGGAATCACTGGGCGTAAAGCGTCTGTAGGTGGCTTAACAAGTCAACTGTTAAATCTTGAAGCTCAACTTCGAAATCGCAGTCGAAACTGTTAGGCTAGAGTATAGTAGGGGTAAAGGGAATTTCCAGTGGAGCGGTGAAATGCGTAGAGATTGGAAAGAACACCGATGGCGAAGGCACTTTACTGGGCTATTACTGACACTCAGAGACGAAAGCTAGGGTAG…
95923adf80352bf57af2c94c3be63e56	D_0__Bacteria;D_1__Spirochaetes;D_2__V2072-189E03;D_3__uncultured organism;D_4__uncultured organism;D_5__uncultured organism;D_6__uncultured organism	TTAAGAATCTTGGACAATGGACGAAAGTCTGATCCAGCGACGCCGCGTGAGTGATGAAGGCCTTCGGGTCGTAAAGCTCGTTAAGTAGGGAAGAATAAGCAGTAACTAATATTTGCTGTGATGACGGTACCTACTGAAAGCCTCGGCTAAATACGTGCCAGCAGCCGCGGTAATACGTATGAGGCAAGCGTTGTTCGGAATTATTGGGCATAAAGGGCATCTAGGCGGGATATTAAGTCGGGTGTGAAAGCCCAGGGCTCAACCCTGGAACTGCATTCGATACTGGTATTCTTGAGTTCGGAAGAGGAAGGCGGAATTCCTGGTGTAGCGGTGAAATGCGTAGATATCAGGAAGAACACCGGTGGCGAAGGCGGCCTTCTGGTCTAGAACTGACGCTGA…
f733af8a3c109add8e08e99e320746e1	D_0__Bacteria;D_1__Planctomycetes;D_2__Planctomycetacia;D_3__Pirellulales;D_4__Pirellulaceae;D_5__uncultured;D_6__uncultured organism	TCGAGAATCTTCGGCAATGGGCGCAAGCCTGACCGAGCGACGCCGCGTGCGGGATGAAGGCCCTCGGGTTGTAAACCGCTGTCAGAGGGGAGGAAATGCATAGGGGTTCTCTCCTATGTTTGACCTATCCTCAGAGGAAGTACGGGCTAAGTTCGTGCCAGCAGCCGCGGTAATACGAACCGTACGAACGTTATTCGGAATCACTGGGCTTAAAGAGTGCGTAGGCGGCCTGGCAAGTTGGGTGTGAAATCCCTCGGCTCAACCGAGGAACTGCGCTCAAAACTGCTAGGCTTGAGGGAGATAGAGGTGAGCGGAACTAATGGTGGAGCGGTGAAATGCGTTGATATCATTAGGAACACCTGAGGCGAAAGCAGCTCACTGGGTCTCTTCTGACGCTGA…
882d641cdc9c0df2714bcc6ae483ca80	D_0__Bacteria;D_1__Proteobacteria;D_2__Gammaproteobacteria	TGGGGAATATTGGACAATGGGGGCAACCCTGATCCAGCAATGCCGCGTGTGTGAAGAAGGCCTGCGGGTTGTAAAGCACTTTCAGTGGGGAAGAGGGTGGATGAGTAACGATCGTTCATTGACGTTACCCACAGAAGAAGCACCGGCTAACTCCGTGCCAGCAGCCGCGGTAATACGGAGGGTGCAAGCGTTAATCGGAATTACTGGGCGTAAAGCGCGCGTAGGCGGTTGGATTAGTCGGATGTGAAAGCCCAGGGCTTAACCTTGGAATTGCACTCGAAACTGTCCAGCTAGAGTATGGGAGAGGGAAGCGGAATTTCCGGTGTAGCGGTGAAATGCGTAGATATCGGAAGGAACACCAGTGGCGAAGGCGGCTTCCTGGACCAATACTGACGCTGA…
839464b66e72b13dd79aa46d63dbcec8	D_0__Bacteria;D_1__Cyanobacteria;D_2__Melainabacteria;D_3__Gastranaerophilales;D_4__uncultured organism;D_5__uncultured organism;D_6__uncultured organism	TAGGGAATTTTGCGCAATGGGCGAAAGCCTGACGCAGCAACACCGCGTGTGGGATGAAGCTTTTCGGAGTGTAAACCACTGTCAGTGGGGACGAATAATGACGGTACCCACAAAGGAAGCACCGGCTAACTACGTGCCAGCAGCCGCGGTAAGACGTAGGGTGCAAGCGTTGTCCGGAATTATTGGGCGTAAAGAGTTCGTAGGCGGCCTGACAAGTCTGATGTTAAAGCCCGGGGCTCAACCCCGGTTCAGCATTGGATACTGTCAAGCTAGAGTACAGGAGAGGCAAGGGGAATTCCTAGTGTAGCGGTGAAATGCGTAGATATTAGGAGGAACACCGGTGGCGAAAGCGCCTTGCTGGACTGTTACTGACGCTGAGGGACGAAAGCCAGGGGAGCA…
bec74f2bc02246ce44aa2fdecc30b878	D_0__Bacteria;D_1__Proteobacteria;D_2__Gammaproteobacteria;D_3__Gammaproteobacteria Incertae Sedis;D_4__Unknown Family;D_5__uncultured	TGGGGAATATTGCACAATGGGCGCAAGCCTGATGCAGCAATGCCGCGTGTGTGAAGAAGGCCTGCGGGTTGTAAAGCACTTTTATTAGGAAAGAAAAACCCGGAGCTAATACCTCCGGCATTGACGGTACCTAAAGAATAAGCACCGGCTAACTCAGTGCCAGCAGCCGCGGTAATACTGAGGGTGCAAGCGTTAATCGGAATTACTGGGCGTAAAGCGAGTGTAGGCGGCTTCGTAAGTCGGATGTGAAAGCCCTGGGCTTAACCTGGGAATGGCATTCGATACTGCGCGGCTAGAGTCTGATAGAGGGAAGTGGAATTCCAGGTGTAGCGGTGAAATGCGTAGAGATCTGGAGGAACACCAGTGGCGAAGGCGGCTTCCTGGATCAAGACTGACGCT…
118e3735b167448578bd1ef3c102788d	D_0__Bacteria;D_1__Planctomycetes;D_2__Planctomycetacia;D_3__Planctomycetales;D_4__Gimesiaceae;D_5__uncultured	TCGAGAATCTTCGGCAATGGACGCAAGTCTGACCGAGCGACGCCGCGTGCGGGATGAAGGCCCTTGGGTTGTAAACCGCTGTCAGAGGGGATGAAATGCATGAAGGCTATCCTTCATGTTTGACAAAGCCTCAGAGGAAGCACGGGCTAAGTACGTGCCAGCAGCCGCGGTAATACGTACTGTGCAAACGTTATTCGGAATCACTGGGCTTAAAGGGTGCGTAGGCGGCTGGTCAAGTCAGGTGTGAAAGTCCTCGGCTCAACCGAGGAATTGCGCTTGAAACTGGTCAGCTCGAGTGAGATAGGGGTGTGCGGAACTTCCGGTGGAGCGGTGAAATGCGTTGATATCGGAAGGAACACCGGTGGCGAAGGCGGCACACTGGGTCTCTACTGACGCTGA…
b9ac9b2f24d73747be5b89dab17e1dbb	D_0__Bacteria;D_1__Bacteroidetes;D_2__Bacteroidia;D_3__Cytophagales;D_4__Cyclobacteriaceae;D_5__uncultured	TGAGGAATATTGGTCAATGGGCGAGAGCCTGAACCAGCCATGCCGCGTGCAGGAAGACGGCCTTCTGGGTTGTAAACTGCTTTTATACGGGAGCAAAAGGACCCTGCGGGGTAAATTGAGAGTATCGTATGAATAAGCACCGGCTAACTCCGTGCCAGCAGCCGCGGTAATACGGAGGGTGCAAGCGTTGTCCGGATTTATTGGGTTTAAAGGGTGCGTAGGCGGCGTAATAAGTCAGTGGTGAAAGCCGGCAGCTCAACTGTCGAGGTGCCATTGAAACTGTTATGCTTGAGTACAGACGAGGTAGGCGGAATTTATGATGTAGCGGTGAAATGCATAGATATCATAAAGAACACCGATAGCGAAGGCAGCTTACTAGGCTGTAACTGACGCTGAGGC…
09271f02dd48205330cf8ad883d707ee	D_0__Bacteria;D_1__Planctomycetes;D_2__Planctomycetacia;D_3__Pirellulales;D_4__Pirellulaceae	TCGAGAATCTTCCGCAATGGGCGCAAGCCTGACGGAGCGACGCCGCGTGCGGGATGAAGGCCTTCGGGTTGTAAACCGCTGTCAGTGGGGAGGAAATGCATAGGGGTTCTCTCCTATGTTTGACCTATCTTCAGAGGAAGGACGGGCTAAGTTCGTGCCAGCAGCCGCGGTAAGACGAACCGTCCAAACGTTATTCGGAATTACTGGGCTTAAAGGGTGCGTAGGCGGCTTGGCAAGTTGGGTGTGAAATCCCTCGGCTCAACCGAGGAACTGCGCTCAAAACTGCCAGGCTAGAGGGAGATAGGGGTGAGCGGAACTAATGGTGGAGCGGTGAAATGCGTTGATATCATTAGGAACACCGGTGGCGGAGGCGGCTCACTGGATCTCTTCTGACGCTGA…
6ead19e4753a8b108c9a6bf69bb49437	D_0__Archaea;D_1__Crenarchaeota;D_2__Bathyarchaeia	TCGCGAAAACTCCGCAATGCACGAAAGTGTGACGGGGCTACCCCGAGTGCCATCCGCTGAGGGTGGCTTTTCTTTGGTATAATTAGCCATTGGAATAAGGAGAGGGCAAGACTGGTGTCAGCCGCCGCGGTAATACCAGCTCTCCGAGTGGTAGGGATGATTATTGGGCTTAAAGCGTCCGTAGCCGGCTTAGCAAGTCTCCTGTTAAATTCAGCGACCTAATCGTTGACCCGCGGGAGATACTACTAGGCTAGGAGGCGGGAGAGGTCGACGGTACTTCTGGGGTAGGGGTGAAATCCTATAATCCCGGGAGGACCACCAGTGGCGAAGGCTGTCGACTAGAACGCGCTCGACGGTGAGGGACGAAAGCTGGGGGAGCGAACC
2718829fd21e92808b4d49b46fa9cb1c	D_0__Bacteria;D_1__Patescibacteria;D_2__WS6 (Dojkabacteria);D_3__uncultured bacterium;D_4__uncultured bacterium;D_5__uncultured bacterium;D_6__uncultured bacterium	TTAGGAATCTTGCGCAATGGACGAAAGTCTGACGCAGCGACGCCGCGTGGAGGATGACGGCTTTCGGGTTGTAAACTCCTTTTATGAGGGAACAAGTTCTGAGTGTACCTCATGAATAAGCACCTTCCAACTACGTGCCAGAAGAATCGGTGATACGTAGGGTGCAAGCGTTATCCGGAATTACTGGGCGTAAAGAGAGCGTAGGCGACTTAGTAAGTCCACAGTTAAATCTTCCGGCTCAACCGGAAACTCGTTGTGGAAACTATTGAGATAGAGGTAGATAGAGGGAAGGGGAATTCCAGGTGGAGCGGTGAAATGCGTTGATATCTGGAGGAACACCAATGGCGAAGGCACCTTCCTGGGTCTTACCTGACGCTAAGGCTCGAGAGCGTGGGGAGC…
dfa6c043f01a4b98ab8622f8c3cd896d	D_0__Bacteria;D_1__Bacteroidetes;D_2__Bacteroidia;D_3__Bacteroidetes VC2.1 Bac22	TAAGGAATATTGGTCAATGGGCGCAAGCCTGAACCAGCCATGCCGCGTGCAGGAAGACGGCCTTATGGGTTGTAAACTGCTTTTATATAGGAATAAACTCCCGATCGTGATCGGGGCTGAAGGTACTATACGAATAAGGACCGGCTAACTCCGTGCCAGCAGCCGCGGTAATACGGAGGGTCCAAGCGTTATCCGGATTTATTGGGTTTAAAGGGTGCGCAGGCGGACCTGCCAGTCAGTGGTGAAATCCCGAGGCTCAACTTCGGAACTGCCATTGATACTACAGGTCTTGAATACGGTTGAGGTAGGCGGAATGTAGCATGTAGCGGTGAAATGCATAGATATGCTACAGAACACCGATCGCGAAGGCAGCTTACCAAACCGATATTGACGCTCAGG…
97e42889ad4aa287862f7a8917fd3d7a	D_0__Bacteria;D_1__Bacteroidetes;D_2__Bacteroidia;D_3__Bacteroidales;D_4__Prolixibacteraceae;D_5__Draconibacterium;D_6__uncultured bacterium	TGAGGAATATTGGGCAATGGAGGCAACTCTGACCCAGCCATCCCGCGTGCAGGATGACGGCCCTATGGGTTGTAAACTGCTTTTGTTTGCCAAGAATGGTTACTACGTGTAGTAATTTGACGGTAGCAAATGAATAAGGACCGGCTAACTCCGTGCCAGCAGCCGCGGTAATACGGAGGGTCCAAGCGTTATCCGGATTCATTGGGTTTAAAGGGTGCGCAGGCGGGCCTTTAAGTCAGTGGTGAAATCTTGCCGCTTAACGGTAAAATTGCCATTGAAACTGAAGGTCTTGAATATGGTTGAGGTAGGCGGAATGTGTTGTGTAGCGGTGAAATGCATAGATATGACACAGAACGCCGATTGCGAAGGCAGCTTACTAAGCCATAATTGACGCTGAGG…
1eb555961e76dd08c27f9d35ff41f324	D_0__Bacteria;D_1__Cyanobacteria;D_2__Oxyphotobacteria;D_3__Chloroplast	TGGGGAATTTTCCGCAATGGGCGAAAGCCTGACGGAGCAATACCGCGTGAGGGAAGACTGCCTATGGGTTGTAAACCTCTTTTTTCAGGGAGGAATAAAATGACGTGTACCTGAAGAATAAGCATCGGCTAACTCCGTGCCAGCAGCCGCGGTAAGACGGAGGATGCAAGTGTTATCCGGAATCACTGGGCGTAAAGCGTCTGTAGGTGGTTTGATAAGTCAACTGTTAAATCTTGAGGCTCAACTTCAAAATCGCAGTCGAAACTATTAGACTAGAGTATAGTAGAGGTAAAGGGAATTTCCAGTGGAGCGGTGAAATGCGTAGATATTGGAAAGAACACCGATGGCGAAAGCACTTTACTGGGCTATTACTAACACTCAGAGACGAAAGCTAGGGTA…
4250373da6c790c68ce2e47a70363118	D_0__Bacteria;D_1__Proteobacteria;D_2__Alphaproteobacteria;D_3__Rhodospirillales;D_4__Magnetospiraceae	TGAGGAATATTGGACAATGGGGGAAACCCTGATCCAGCAATGCCGCGTGAGTGAAGAAGGCTCTTGGGTTGTAAAACTCTTTCGCCGGTGAAGATTATGACGGTAACCGGTAAAGAAGCCCCGGCTAACTCCGTGCCAGCAGCCGCGGTAATACGGAGGGGGCTAGCGTTGTTCGGAATTACTGGGCGTAAAGCGCGCGTAGGTGGATAGGAAAGTTAGGGGTGAAAGACCTGGGCTCAACCCAGGAACTGCCTCTGATACTTCCTGTCTAGAGATCGGGAGAGGGCAATAGAATTTCCAGTGTGGAGGTGAAATTCGCAGATATTGGAAAGAATACCAGTGGCGAAGGCGGTTGCCTGGCCCGATACTGACACTAAAGTGCGAAAGCGTGTGGAGCGA…
41156ab684408266030512172bacfe1d	D_0__Bacteria;D_1__Bacteroidetes;D_2__Bacteroidia;D_3__Flavobacteriales;D_4__Crocinitomicaceae;D_5__Crocinitomix;D_6__uncultured bacterium	TGAGGAATATTGGGCAATGGAGGCAACTCTGACCCAGCCATGCCGCGTGCAGGAAGAATGCCTTATGGGTTGTAAACTGCTTTTATTTGGGAAGAAACCTTTCTACGTGTAGAGAGCTGACGGTACCAAACGAATAAGGACCGGCTAACTCCGTGCCAGCAGCCGCGGTAATACGGAGGGTCCAAGCGTTATCCGGAATCATTGGGTTTAAAGGGTCCGTAGGCGGGACGATAAGTCAGTGGTGAAATCCTACAGCTTAACTGTAGAACTGCCATTGATACTGTCGTTCTTGAATTTGGTCGAAGTGGGCGGAATAAGTAGTGTAGCGGTGAAATGCATAGATATTACTTAGAACACCGATAGTGAAGACAGCTCACTAGGCCTGAATTGACGCTGAGG…
7900ebf9896267b650c0f64bb87fcedc	D_0__Bacteria;D_1__Patescibacteria;D_2__Saccharimonadia;D_3__Saccharimonadales;D_4__uncultured bacterium;D_5__uncultured bacterium;D_6__uncultured bacterium	TAGGGAATCTTCCACAATGGACGAAAGTCTGATGGAGCAACGCCGCGTGCAGGACGACGGCCTTAGGGTTGTAAACTGCTTTTATAGACGAAGATTATGACGGTAATCTATGAATAAGGGTCGGCTAACTCCGTGCCAGCAGCCGCGGTCAGACGGAGGACCCAAGCGTTATTCGGAATGACTGGGCGTAAAGAGTTGCATAGGTGGTTTTGTAAGCAAAGCATGAAATCGTGAGGCTCAACCTCACCACTGTGCTTTGAACTGCAAGACTTGAGTATGGTAGAGGAAGCTGGAATTTCTAGTGTAGGAGTGAAATCCGTAGATATTAGAAGGAACACCAATGGCGTAGGCAGGCTTCTGGACCATTACTGACACTGAGGCACGAAAGCGTGGGGAGCG…
c282f6cdf04936c3668b2639a526ce6e	D_0__Bacteria;D_1__Epsilonbacteraeota;D_2__Campylobacteria;D_3__Campylobacterales;D_4__Sulfurovaceae;D_5__Sulfurovum	TGAGGAATATTGGTCAATGGATGAGAGTCTGAACCAGCCATGCCGCGTGAAGGATTAAGGCCCTATGGGTCGTAAACTTCTTTTTTACGGGAATAAAAGTCTTACGAGTAAAGATCTGCAGGTACCGTACGAATAAGCACCGGCTAACTCCGTGCCAGCAGCCGCGGTAATACGGAGGGTGCAAGCGTTACTCGGAATCACTGGGCGTAAAGCGCGCGCAGGCGGCCATTTAAGTTGGATGTGAAAGCCTACGGCTCAACCGTAGAACTGCATCCAAAACTATTTGGCTAGAGTGTGGGAGAGGAAGATGGAATTAGTTGTGTAGGGGTAAAATCCGTAGAGATAACTAGGAATACCAAAAGCGAAGGCAATCTTCTGGAACACTACTGACGCTGAGGC…
e66e926e3405fd626ec240019e02bb0a	D_0__Bacteria;D_1__Proteobacteria;D_2__Gammaproteobacteria;D_3__B2M28	TGGGGAATATTGCACAATGGGCGAAAGCCTGATGCAGCAATGCCGCGTGTGTGAAGAAGGCCTGCGGGTTGTAAAGCACTTTCAGTAGGGAGGATTATGACGTTACCTACAGAAGAAGCACCGGCTAACTCTGTGCCAGCAGCCGCGGTAATACAGAGGGTGCGAGCGTTAATCGGAATTACTGGGCGTAAAGCGCGCGTAGGCGGCTTGGTCAGTCGGATGTGAAAGCCCCGGGCTTAACCTGGGAATTGCATTCGATACTGTCAGGCTAGAATGTAGTAGAGGGAAGTGGAATTCCGGGTGTAGCGGTGAAATGCGTAGAGATCCGGAGGAACATCAGTGGCGAAGGCGACTTCCTGGACTAACATTGACGCTGAGGCGCGAAAGCGTGGGGAGCAA…
128c1654032c0a1383e4464637bba0d4	D_0__Bacteria;D_1__Bacteroidetes;D_2__Bacteroidia;D_3__Bacteroidales;D_4__Prolixibacteraceae;D_5__Prolixibacter;D_6__uncultured Bacteroidales bacterium	TGAGGAATATTGGTCAATGGGCGAGAGCCTGAACCAGCCATCCCGCGTGCAGGATGACGGCCCTACGGGTTGTAAACTGCTTTTATATACCAAGAAACCTATCTACGTGTAGATAGCTGACGGTAGTATATGAATAAGCATCGGCTAACTCCGTGCCAGCAGCCGCGGTAATACGGAGGATGCAAGCGTTATCCGGATTCACTGGGTTTAAAGGGTGCGTAGGCGGTCTTTTAAGTCAGTGGTGAAATCCTGCGGCTCAACCGTAGAACTGCCATTGAAACTGAAAGACTTGAGTACACTGGAGGTAAGCGGAATGTGTAGTGTAGCGGTGAAATGCTTAGATGTTACACGGAACACCGATTGCGAAGGCAGCTTACTATAGTGTCACTGACGCTGATG…
906ed7a9b675c18db1795a222e0478d9	D_0__Bacteria;D_1__Patescibacteria;D_2__Saccharimonadia;D_3__Saccharimonadales;D_4__uncultured organism;D_5__uncultured organism;D_6__uncultured organism	TAGGGAATTTTCCACAATGGACGAAAGTCTGATGGAGCAACGCCGCGTGCAGGATGACGGCCTTCGGGTTGTAAACTGCTTTTATGAGTGAAGATTTAGACGGTAACTCAAGAATAAGGATCGGCTAACTACGTGCCAGCAGCCGCGGTCATACGTAGGATCCAAGCGTTATCCGGAATTACTGGGCGTAAAGAGTTGCGTAGGTGGTTAATTAAGCAAGATATGAAATCGTACGGCTCAACCGTATACACGTATTTTGAACTGATTAACTAGAGGGCGAGAGAGGTTATTGGAATTTCTTGTGTAGGAGTGAAATCCGTAGATATAAGAAGGAACACCGATGGCGTAGGCAGATAACTGGCTCGCACCTGACACTGAGGCACGAAAGCGTGGGGAGCA…
007578424b9eee6b74a1e99b577c3b61	D_0__Bacteria;D_1__Planctomycetes;D_2__OM190;D_3__uncultured planctomycete;D_4__uncultured planctomycete;D_5__uncultured planctomycete;D_6__uncultured planctomycete	TCGAGAATCTTCCACAGTGGACGAAAGTCTGATGGAGCGACGCTGCGTGCAGGATGACGGCCTTAGGGTTGTAAACTGCTGTCACGCCTAAGGAACCCGTGTGTGTTAATAGCGCACGCGCTGACCTAAGCGAGAGGAAGTGCCGGCTAACTCCGTGCCAGCAGCCGCGGTAATACGGAGGGCGCAAGCGTTGTTCGGAATCACTGGGCATAAAGAGCACGTAGGCGGTCTGCTAAGTCGAATGTGAAAGCCCTCGGCTCAACCGGGGAACTGCATCCGATACTGGTAGACTGGAGGAAGGCAGGGGTGAGTGGAACTCCAGGTGGAACGGTGAAATGTGTAGATATCTGGAGGAACACCGGCGGCGAAGGCGGCTTTCTGGACAGTTACTGACACTGA…
5213813ae13f232ecf846aa0ccba4cf8	D_0__Bacteria;D_1__Planctomycetes;D_2__Planctomycetacia;D_3__Pirellulales;D_4__Pirellulaceae	TCGAGAATCTTCCGCAATGGGCGAAAGCCTGACGGAGCGACGCCGCGTGCGGGATGAAGGCCTTCGGGTTGTAAACCGCTGTCAGAGGGGAGCAAATCCAGTTTACTGGTTGAGCTATCCTCAGAGGAAGCGCAGGCTAAGTTCGTGCCAGCAGCCGCGGTAACACGAACTGCGCGAACGTTATTCGGAATCATTGGGCTTAAAGAGTTCGTAGGCGGCCTGATTAGTTGGGTGTGAAATCCCTCGGCTCAACCGAGGAACTGCGCCCAATACTGTCAGGCTTGAGGGAGACAGAGGTGAGTGGAACTGATGGTGGAGCGGTGAAATGCGTTGATATTATCAGGAACACCGGTGGCGAAAGCGGCTCACTGGGTCTCTTCTGACGCTGAGGAACGAAAG…
e162a02d72db98864472eb9ffbf68afe	D_0__Bacteria;D_1__Bacteroidetes;D_2__Bacteroidia;D_3__Sphingobacteriales;D_4__NS11-12 marine group;D_5__uncultured bacterium;D_6__uncultured bacterium	TAGGGAATATTGGGCAATGGAGGCAACTCTGACCCAGCCACGCCGCGTGAAGGAAGAAGGCCCTCTGGGTCGTAAACTTCTTTTATATACCAAGAAACCTTCTCACGTGTGGGAAGCTGACGGTAGTATAAGAATAAGCACCGGCTAACTCCGTGCCAGCAGCCGCGGTAATACGGAGGGTGCAAGCGTTGTCCGGATTTATTGGGTTTAAAGGGTACGTAGGCGGAATAATAAGTCGGTGGTGAAATCCCGTAGCTCAACTATGGAACTGCCATTGAAACTGTTATTCTTGAATTCGGTCGAGGTAATTGGAATGTAACATGTAGCGGTGAAATGCTTAGATATGTTACGGAACACCGATAGCGAAGGCAGATTACTAGACCGATATTGACGCTCAGG…
c9ccbb01bfe890d02db4b966f45db61b	D_0__Bacteria;D_1__Proteobacteria;D_2__Alphaproteobacteria;D_3__Rickettsiales;D_4__Rickettsiaceae;D_5__uncultured;D_6__uncultured bacterium	TGAGGAATATTGGACAATGGGCGCAAGCCTGATCCAGCAATGTCGCGTGAATGATGAAGGCCTTAGGGTTGTAAAGTTCTTTCGGTAGGGAAGAAAATGACGGTACCTACAGAAGAAGCTCCGGCTAACTCCGTGCCAGCAGCCGCGGTAATACGGGGGGAGCTAGCGTTTTTCGGATTTACTGGGCGTAAAGGGTGCGTAGGCGGTTAATAAAGTTGAAAGTGAAATCCCCGGGCTTAACCTGGGAACTGCTTTCAAAACTCATTAACTAGAGAACGATAGAGGATAGCAGAATTCCTAGTGTAGAGGTGAAATTCTTAGATATTAGGAGGAATACCGGTGGCGAAGGCGGCTATCTGGATCGTTACTGACGCTGAGGCACGAAAGCGTGGGGAGCAA…
24b2c87e513d04376916eb8a81319904	D_0__Bacteria;D_1__Lentisphaerae;D_2__Lentisphaeria;D_3__Victivallales;D_4__BD2-3;D_5__uncultured bacterium;D_6__uncultured bacterium	TCGAGAATCTTCCGCAATGGGCGAAAGCCTGACGGAGCGATGCCGCGTGCAGGATGAAGGCCCTTGGGTCGTAAACTGCTGTCACCAGGGAAGAACATAATGACGGTACCTGGAGAGGAAGCACCGGCTAACTACGTGCCAGCAGCCGCGGTAATACGTAGGGTGCAAGCGTTGTTCGGATTTATTGGGCGTAAAGGGTTCGCAGGGGGTCTCTTAAGTCTGATGTGAAATCTCACGGCTCAACCGTGAAACTGCATTGGAAACTGAGAGACTAGAGTACTGGAGAGGTAAGTGGAATTCCTAGTGGAGCGGTGGAATGCGTAGATATCAGGAGGAACACCAAGAGCGAAGGCAACTTACTGGACAGTTACTGACCCTCAGGAACGAAAGCATGGGTAG…
6b6e203efb4d316bd1d6fd30e4ba5c63	D_0__Bacteria;D_1__Proteobacteria;D_2__Gammaproteobacteria;D_3__Gammaproteobacteria Incertae Sedis;D_4__Unknown Family;D_5__uncultured;D_6__uncultured gamma proteobacterium Sva0318	TGGGGAATATTGCACAATGGGCGCAAGCCTGATGCAGCAATGCCGCGTGTGTGAAGAAGGCCTGCGGGTTGTAAAGCACTTTTATTAGGAAAGAAAAACCCGGAGCTAATACCTCCGGCATTGACGGTACCTAAAGAATAAGCACCGGCTAACTCAGTGCCAGCAGCCGCGGTAATACTGAGGGTGCAAGCGTTAATCGGAATTACTGGGCGTAAAGCGAGTGTAGGCGGTTTAGCAAGTCGGATGTGAAATCCCAGGGCCCAACCCTGGAACTGCATCCGATACTGTTAGGCTAGAGTCCCGGAGAGGATGGCGGAATTCCCGGTGTAGGGGTGAAATCCGTAGATATCGGGAGGAACACCAGTGGCGAAGGCGGCCATCTGGACGGTGACTGACGCT…
e1a69c610cc872f9ea600e338e804638	D_0__Bacteria;D_1__Gemmatimonadetes;D_2__Gemmatimonadetes;D_3__Gemmatimonadales;D_4__Gemmatimonadaceae;D_5__uncultured;D_6__uncultured bacterium	TGGGGAATATTGCGCAATGGCCGAAAGGCTGACGCAGCGACGCCGCGTGTGGGATGAAGGTCCTCGGATTGTAAACCACTGTCAGGAGGGACGAATGCCGGGCAACCGGTTTGACGGTACCTCCAGAGGAAGCACCGGCTAACTCCGTGCCAGCAGCCGCGGTAATACGGAGGGTGCGAGCGTTGTCCGGAATCACTGGGCGTAAAGGGCGCGTAGGCGGCTCGGTAAGTAGGGGGTGAAATCCCACGGCTCAACCGTGGGCCTGCCTCCTAAACTGTCGAGCTTGAGCACGGTAGAGGCAGATGGAATTCCCGGTGTAGCGGTGGAATGCGTAGATATCGGGAAGAACACCAGTGGCGAAGGCGGTCTGCTGGGCCGTTGCTGACGCTGAGGCGCGAT…
84d88e9f15471c17a9c9733f2d14baf1	D_0__Bacteria;D_1__Proteobacteria;D_2__Gammaproteobacteria;D_3__Gammaproteobacteria Incertae Sedis;D_4__Unknown Family;D_5__uncultured	TGGGGAATATTGCACAATGGGCGCAAGCCTGATGCAGCAATGCCGCGTGTGTGAAGAAGGCCTGCGGGTTGTAAAGCACTTTTATTAGGAAAGAAAAACCCGGAGTTAATACCTCCGGCATTGACGGTACCTAAAGAATAAGCACCGGCTAACTCAGTGCCAGCAGCCGCGGTAATACTGAGGGTGCAAGCGTTAATCGGAATTACTGGGCGTAAAGCGAGTGTAGGCGGCTTCGTAAGTCGGATGTGAAAGCCCTGGGCTTAACCTGGGAATTGCATTCGATACTGCGCGGCTAGAGTTTGATAGAGGGAAGTGGAATTCCAGGTGTAGCGGTGAAATGCGTAGATATCTGGAGGAACACCAGTGGCGAAGGCGGCTTCCTGGATCAAAACTGACGCT…
91f2ed69dc794bf2ca8c95d61ca5b99d	D_0__Bacteria;D_1__Spirochaetes;D_2__V2072-189E03;D_3__uncultured organism;D_4__uncultured organism;D_5__uncultured organism;D_6__uncultured organism	TTAAGAATCTTGGACAATGGACGAAAGTCTGATCCAGCGACGCCGCGTGAGCGATGAAGGCCTTCGGGTCGTAAAGCTCGTTAAGTAGGGAAGAATAAGCAGTGAGTAATATTTACTGTGATGACGGTACCTACTGAAAGCCTCGGCTAAATACGTGCCAGCAGCCGCGGTAATACGTATGAGGCAAGCGTTGTTCGGAATTATTGGGCATAAAGGGCATCTAGGCGGGATGTTAAGTCGGGTGTGAAAGGCCAGGGCTCAACCCTGGGACTGCATTCGATACTGGCATTCTTGAGTTCGGAAGAGGAAGGCGGAATTCCTGGTGTAGCGGTGAAATGCGTAGATATCAGGAAGAACACCGGTGGCGAAGGCGGCCTTCTGGTCTAGAACTGACGCTGA…
f966890884b4ffb8562f14f5acbcef6c	D_0__Bacteria;D_1__Planctomycetes;D_2__Planctomycetacia;D_3__Pirellulales;D_4__Pirellulaceae	TCGAGAATCTTCGGCAATGAGCGAAAGCTTGACCGAGCGACGCCGCGTGCGGGATGAAGGCCCTCGGGTTGTAAACCGCTGTCAGAGGGGATGAAATTCACGGAGTTCGACTTCGTGTTTGACAAAGCCTCAGAGGAAGGGCGGGCTAAGTTCGTGCCAGCAGCCGCGGTAAGACGAACCGCCCAAACGTTATTCGGAATCACTGGGCTTAAAGGGTGCGTAGGCGGCCCGGTAAGTTGGGTGTGAAATCCCTCGGCTCAACCGAGGAATGGCGCCCAATACTGCCGGGCTTGAGGGAGATAGGGGTGAGCGGAACTTAGGGTGGAGCGGTGAAATGCGTTGACATCCTAAGGAACACCGATGGCGAAGGCAGCTCACTGGATCTCTTCTGACGCTGAG…
f6d7d9e12df0f1d8fc0e392c65a6dbc2	D_0__Bacteria;D_1__Bacteroidetes;D_2__Bacteroidia;D_3__Flavobacteriales;D_4__Flavobacteriaceae	TGAGGAATATTGGACAATGGGCGCAAGCCTGATCCAGCCATGCCGCGTGCAGGAAGACTGCCCTATGGGTTGTAAACTGCTTTTATATAGGAAGAAACCTTTCCACGTGTGGAGAGCTGACGGTACTATAAGAATAAGGATCGGCTAACTCCGTGCCAGCAGCCGCGGTAATACGGAGGATCCAAGCGTTATCCGGAATCATTGGGTTTAAAGGGTCCGTAGGTGGATAAATAAGTCAGAGGTGAAATCCTGCAGCTCAACTGTAGAACTGCCTTTGAAACTGTTTATCTTGAGTCATTATGAAGTGGTTAGAATGTGTAGTGTAGCGGTGAAATGCGTAGATATCGGGAGGAACACCTGTGGCGAAGGCGGTCTCCTGGGCCGGTACTGACGCTGAGG…
dc078f62729cd8e021bece06febd1527	D_0__Bacteria;D_1__Planctomycetes;D_2__Planctomycetacia;D_3__Pirellulales;D_4__Pirellulaceae;D_5__Pir4 lineage	TCGAGAATCTTCGGCAATGGACGCAAGTCTGACCGAGCGATGCCGCGTGCGGGATGAAGGCCTTCGGGTTGTAAACCGCTGTCAGTGGGGATGAAATGCATAGGGGTTATCCCCTATGTTTGACAAATCTTCAGAGGAAGTACGGGCTAAGTTCGTGCCAGCAGCCGCGGTAAGACGAACCGTACAAACGTTATTCGGAATCACTGGGCTTAAAGGGTGCGTAGGCGGCCAGGTAAGTTGGGTGTGAAATCCCTCGGCTCAACCGAGGAACTGCGCCCAAAACTACTTGGCTTGAGGGAGATAGAGGTGAGCGGAACTTAGGGTGGAGCGGTGAAATGCGTTGATATCCTAAGGAACACCGGTGGCGAAAGCGGCTCACTGGATCTCTTCTGACGCTGA…
76fbd673c9fa1db6f0cc414de5d92cba	D_0__Bacteria;D_1__Proteobacteria;D_2__Deltaproteobacteria;D_3__Myxococcales;D_4__Nannocystaceae;D_5__uncultured;D_6__uncultured delta proteobacterium	TGGGGAATATTGCGCAATGGGCGAAAGCCTGACGCAGCCACGCCGCGTGTGCGATGAAGGCCTTCGGGTCGTAAAGCACTGTGGGGAGAGAAGAATAAAGCCTGTGAAGAGCAGGCCTTGACGGTATCTCCTTAGCAAGCACCGGCTAACTCCGTGCCAGCAGCCGCGGTAATACGGAGGGTGCAAACGTTGCTCGGAATCATTGGGCGTAAAGCGCGCGTAGGCGGTCTTGCAAGTTGGGTGTGAAAGCCCAGGGCTTAACCCTGGAAGTGCACCCAAAACTGCAAGACTTGAGTCTCGGAGGGGGCCAGAGAATTCCCGGTGTAGAGGTGAAATTCGTAGATATCGGGAGGAATACCAGTGGCGAAGGCGCTGGCCTGGACGATGACTGACGCTGAG…
a97c8bcc48f40155953e497f60146f84	D_0__Bacteria;D_1__Bacteroidetes;D_2__Bacteroidia;D_3__Flavobacteriales;D_4__Crocinitomicaceae;D_5__uncultured;D_6__uncultured sediment bacterium	TGAGGAATATTGGGCAATGGAGGCAACTCTGACCCAGCCATGCCGCGTGCAGGAAGACGGCCCTACGGGTTGTAAACTGCTTTTATTTGGGAAGAAACCCTATTACGTGTAATAGGCTGACGGTACCAAACGAATAAGCACCGGCTAACTCCGTGCCAGCAGCCGCGGTAATACGGAGGGTGCAAGCGTTATCCGGAATTATTGGGTTTAAAGGGTCCGTAGGCGGACCAATAAGTCAGTGGTGAAATCTTTCGGCTCAACCGGAAAACTGCCATTGATACTGTTGGTCTTGAATATGTTTGAAGTGGGCGGAATATGGCATGTAGCGGTGAAATGCATAGATATGCCATAGAGCACCGATAGCGAAGGCAGCTCACTAAGCCATCATTGACGCTAATG…
bc3f2ee12363a4da517ecc3705383690	D_0__Bacteria;D_1__Planctomycetes;D_2__Planctomycetacia;D_3__Planctomycetales;D_4__uncultured;D_5__uncultured bacterium;D_6__uncultured bacterium	TCGAGAATCTTCCACAATGGGCGAAAGCCTGATGGAGCGACGCCGCGTGCGGGATGAAGGCCCTTGGGTTGTAAACCGCTGTCAGAGGGGATGAAATCCTTGGGGGCTATCCCCCTTGGTTGACAGAGCCTCAGAGGAAGCACGGGCTAAGTTCGTGCCAGCAGCCGCGGTAATACGAACTGTGCAAACGTTATTCGGAATCACTGGGCTTAAAGGGTGCGCAGGCGGCCGATCAAGTCAGGTGTGAGATGCCCCGGCTCAACCGGGGCACTGCGCTTGAAACTGGTCGGCTTGAGTGAGATAGGGGTGTGCGGAACTGCCAGTGGAGCGGTGAAATGCGTTGATATTGGCAGGAACACCGGTGGCGAAAGCGGCACACTGGGTCTCAACTGACGCTCA…
eb55ddd1c7863c5e41a750cea36bb67b	D_0__Bacteria;D_1__Bacteroidetes;D_2__Bacteroidia;D_3__Cytophagales;D_4__Cyclobacteriaceae;D_5__uncultured;D_6__uncultured Bacteroidetes bacterium	CAGGGAATATTGGTCAATGGAGGCAACTCTGAACCAGCCATGCCGCGTGAAGGAAGAAGGCGTTCTGCGTCGTAAACTTCTTTTATACAGGAAGAAAAGACCTTGCGAGGTTCTATGACGGTACTGTAAGAATAAGGACCGGCTAACTCCGTGCCAGCAGCCGCGGTAATACGGAGGGTCCGAGCGTTGTCCGGAATTATTGGGTTTAAAGGGTGCGTAGGCTGTTAGATCAGTCAGAGGTGAAATCTCAAGGCTTAACCTTGAAACTGCCTTTGATACTGTCTGACTTGAATTTACTAGGGGTAAGCGGAATTTATGATGTAGCGGTGAAATGCATAGATATCATAAAGAACACCGATAGCGTAGGCAGCTTACTGGAGTATTATTGACGCTGAGGCA…
f56bb428a632aa05552c38acdb4f5540	D_0__Bacteria;D_1__Proteobacteria;D_2__Deltaproteobacteria;D_3__Myxococcales;D_4__Eel-36e1D6	TGGGGAATCTTGCGCAATGGGCGAAAGCCTGACGCAGCGACGCCGCGTGAGTGATGAAGGCCCTAGGGTTGTAAAGCTCTGTGGAGGGGGACGAATAAGCACGGGTTAACACCCCGGGTGATGACGGTACCCCTTTAGCAAGCACCGGCTAACTCTGTGCCAGCAGCCGCGGTAAGACAGAGGGTGCAAACGTTGTTCGGAATTACTGGGCGTAAAGCGCGTGTAGGCTGTTGCGCAAGTCGGGTGTGAAAGCCCTGGGCTCAACCCAGGAAGTGCACTCGAAACTGCGTGACTAGAGTCTCGGAGAGGGAGGCGGAATTCTCGGTGTAGAGGTGAAATTCGTAGATATCGAGAGGAACACCAGTGGCGAAGGCGGCCTCCTGGACGATGACTGACGCT…
1544017000413576436afd4b0301ad95	D_0__Bacteria;D_1__Planctomycetes;D_2__OM190	TCGAGAATCTTCCGCAATGGGCGAAAGCCTAACGGAGCGACACCGCGTGCAGGATGACGGCCCTCGGGTTGTAAACTGCTGTCACGCTATAGGAACTCCCTACTGTTAATAGCTTTAGGGCTGACCAAAGCGAAAGGAAGCACCGGCTAACTCCGTGCCAGCAGCCGCGGTAAGACGGAGGGTGCAAACGTTGCTCGGAATCACTGGGCATAAAGAGCACGTAGGCGGCTAAGTCAGTCTGGTGTGAAAGCCCCCGGCTCAACCGGGGAATTGCATCGGATACTGCTTGGCTTGAGGACGGTTGGGGTGAGTGGAACTCCTGGTGGAGCGGTGAAATGCGTAGATATCAGGAGGAACACCAGTGGCGAAAGCGACTCACTGGGCCGTCTCTGACGCTGA…
e50b9409281deae52b29f5f238830467	D_0__Bacteria;D_1__Bacteroidetes;D_2__Bacteroidia;D_3__Flavobacteriales;D_4__Cryomorphaceae;D_5__uncultured	TGAGGAATATTGCACAATGGACGGAAGTCTGATGCAGCCATGCCGCGTGCAGGATGAATGCCCTATGGGTTGTAAACTGCTTTTATATAGGAAGAAACTTTTCTACGAGTAGAGAACTGACGGTACTATAAGAATAAGGACCGGCTAACTCCGTGCCAGCAGCCGCGGTAATACGGAGGGTCCAAGCGTTATCCGGATTCATTGGGTTTAAAGGGTCCGTAGGCGGGAGAATAAGTCAGTGGTGAAAGCCTACAGCTTAACTGTAGAACTGCCATTGAAACTGTTTTTCTTGAATTTAGATGAAGTGGGCGGAATATATCATGTAGCGGTGAAATGCATAGATATGATATAGAACACCGATTGCGAAGGCAGCTCACTAAACTAATATTGACGCTGAGG…
76dc88ae961a7e0ebfa451955b0d8ea4	D_0__Bacteria	TGAGGAATAGTGGACAATGAGTGAAAACTTGATCCCACAATATTGCGTGAAAGATTTTTGAAGGTAATTATACTGTAAATTTCTTTTAAATAGTTCTATTATGAAGTTAATATTTGAATAAGTCCTGGCTAACCTCGTGCCAGCAGCCGCGGTAATACGGGGAGGGCAAGTGTTATTCGGCGTAACTGGGCTTAAAGGGCAAGTAGGTTGTTAGATATGTTTTAAATAAAATCTTATAGCTATACTGTAAAATGGTTTAAAAAACAATCTAACTAGAGTTTTTAAAGAAGTTAGCGGTACTTTTAAAGTAAAGGTAAAATTTTTTGATATTAGAAAGACCATCAAGGGTGAAAACAGCTTACTATTAATATAAACTGACACTGAATTGCAAAAGCGTGG…
5e6996f2be12c9be296b50988519757c	D_0__Bacteria;D_1__Bacteroidetes;D_2__Bacteroidia;D_3__Cytophagales;D_4__Cyclobacteriaceae;D_5__uncultured	TAGGGAATATTGGTCAATGGAGGCAACTCTGAACCAGCCATGCCGCGTGAAGGATGAAGGCGTTCTGCGTCGTAAACTTCTTTTATACAGGAAGAAAAGACCTTGCGAGGTTCTATGACGGTACTGTACGAATAAGCACCGGCTAACTCCGTGCCAGCAGCCGCGGTAATACGGAGGGTGCGAGCGTTGTCCGGAATTATTGGGTTTAAAGGGTGCGTAGGCGGTCTAATAAGTCAGAGCTGAAATCTCGGGGCTCAACCCCGAAACTGGCTTTGATACTGTTGGACTTGAATATACTAGAAGTAGGCGGAATTTATGATGTAGCGGTGAAATGCATAGATATCATAAAGAACACCGATAGCGAAGGCAGCTTACTGGAGTATTATTGACGCTGAGGCA…
c4e2aed4c2ca5a9268ecb41a4564e437	D_0__Bacteria;D_1__Patescibacteria;D_2__Gracilibacteria;D_3__Candidatus Peregrinibacteria;D_4__Candidatus Peregrinibacteria bacterium GW2011_GWF2_39_17;D_5__Candidatus Peregrinibacteria bacterium GW2011_GWF2_39_17;D_6__Candidatus Peregrinibacteria bacterium GW2011_GWF2_39_17	TAAAGAATCTTCCACAATGGGCGAAAGCCTGATGGAGCAACACCGCGTGATTGATGACGCCCTTCGGGGTGTAAAGATCTTTTCTGGGGGAAGAATTCTGACGGTACCCTAGGAATAAGCACCGGCTAAATTCGTGCCAGCAGCCGCGGTAATACGAATGGTGCAAGCGTTATCCGGAATTATTGGGCGTAAAGCGTCCGCAGGCGGCGCATTAAGTTGGGTGTTAAAGCCTCCAGCTCAACTGGAGTTTAGTGCCCAAAACTGATGTGCTAGAGACTTGGAGAGGTTAGTGGAATTCAGTGTGTAGGGGTAAAATCCGTAGATACACTGAGGAACACCAAAAGCGAAGGCAGCTAACTGGCCAAGTTCTGACGCTCAGGGACGAAAGCGTGGGGAGCG…
20c752579fc6c208d66b36013bac5c69	D_0__Bacteria;D_1__Chloroflexi;D_2__KD4-96;D_3__uncultured bacterium;D_4__uncultured bacterium;D_5__uncultured bacterium;D_6__uncultured bacterium	TCGGGAATTTTGCTCAATGGGGGAAACCCTGAAGCAGCAACGCCGCGTGAGGGATGACGGCCTTCGGGTTGTAAACCTCTTTTGCCGGGGACGATAATGACGGTACCCGGAGAATAAGCCACGGCTAACTACGTGCCAGCAGCCGCGGTAATACGTAGGTGGCAAGCGTTGTCCGGATTTACTGGGCGTAAAGAGCGCGCAGGCGGCCAGGTCAGTCGAATGTGAAAGCCCCCGGCTCAACTGGGGAGGGTCGTTCGATACTGCTTGGCTCGAAGATAGGAGAGGGAAGTGGAATTTCAGGTGTAGTGGTGAAATGCGTAGATATCTGAAGGAACACCAGTGGCGAAGGCGACTTTCTGGCCTATTCTTGACGCTGAGGCGCGAAAGCTAGGGGAGCGA…
1a6e16890e056184e77933e25152d2a6	D_0__Bacteria;D_1__Proteobacteria;D_2__Gammaproteobacteria	TGGGGAATATTGCACAATGGGGGAAACCCTGATGCAGCGATGCCGCGTGTGTGAAGAAGGCCTTCGGGTTGTAAAGCACTGTCGCAGGGGAAGAAACAAATGACGGTACCCTGTTAGAAAGCACCGGCTAACTCCGTGCCAGCAGCCGCGGTAATACGGAGGGTGCAAGCGTTAATCGGAATTACTGGGCGTAAAGCGCACGTAGGTGGTTATGTAAGTTAGATGTGAAAAACCCGGGCTTAACCTGGGCCTTGCATCTGATACTGCATGACTAGAGTATGGTAGAGGGAAGTGGAGTTTCAGGTGTAGCGGTGAAATGCGTAGAGATCTGAAGGAACACCAGTGGCGAAGGCGACTTCCTGGACCAATACTGACACTGAGGTGCGAAAGCGTGGGTAG…
fb36f009041f966fd12359a449ea2f07	D_0__Bacteria;D_1__Proteobacteria;D_2__Deltaproteobacteria;D_3__PB19;D_4__uncultured deep-sea bacterium;D_5__uncultured deep-sea bacterium;D_6__uncultured deep-sea bacterium	TGGGGAATTTTGCGCAATGGGCGAAAGCCTGACGCAGCAACGCCGCGTGTGTGATGAAGGCCTTCGGGTTGTAAAGCACTGTTCAGAAGGAAGAACGCTTGGGGGTAACGCCTCAAGGTGACGGTACTTCTGCAGAAAGCACTGGCTAACTCCGTGCCAGCAGCCGCGGTAATACGGAGAGTGCAAGCGTTGTTCGGAATTATTGGGCGTAAAGGGCGTCTAGGTGGCTTGCCAAGTCAGGTGTGAAATCCCTCGGCTCAACCGAGGAACTGCACTTGAAACTGGTGAGCTTGAGTGTCGGAGGGGGCAGCGGAATTCCCGGTGTAGAGGTGAAATTCGTAGATATCGGGAGGAACACCAGTGGCGAAGGCGGCTGTCTGGCCGAACACTGACACTGGA…
25b2b82e54090810e53e65162a6de689	D_0__Bacteria;D_1__Planctomycetes;D_2__OM190	TCGAGAATCTTCCGCAATGGGCGAGAGCCTGACGGAGCGACACCGCGTGCAGGATGACGGCCTTCGGGTTGTAAACTGCTGTCACGCCATAGGAATTCCCTGCTGTTAATAGCTTCAGGGTTGACCAAAGCGAAAGGAAGCACCGGCTAACTCCGTGCCAGCAGCCGCGGTAAGACGGAGGGTGCAAACGTTGTTCGGAATCACTGGGCATAAAGCGCACGTAGGCGGCTAAGTCAGTCTGGTGTGAAAGCCCCCGGCTCAACCGGGGAACTGCATCGGATACTGCTTGGCTCGAGGACGGTAGGGGTGAGTGGAACTCCTGGTGGAGCGGTGAAATGCGTAGATATCAGGAGGAACACAGTGGCGAAAGCGACTCACTGGGCCGTCTCTGACGCTGAG…
7997a7c60912ac1584e40b192587e759	D_0__Bacteria;D_1__Bacteroidetes;D_2__Bacteroidia;D_3__Flavobacteriales;D_4__Cryomorphaceae;D_5__uncultured;D_6__uncultured bacterium	TGAGGAATATTGGGCAATGGAGGCAACTCTGACCCAGCCATGCCGCGTGCAGGAAGACGGCCCTATGGGTTGTAAACTGCTTTTATATAGGAAGAAACCTACTTACGTGTAAGTAGCTGACGGTACTATATGAATAAGCACCGGCTAACTCCGTGCCAGCAGCCGCGGTAATACGGAGGGTGCAAGCGTTATCCGGAATCATTGGGTTTAAAGGGTCCGTAGGCGGATTAGTAAGTCAGTGGTGAAATCCTACAGCTTAACTGTAGAACTGCCATTGATACTGCTAGTCTTGAGTATAGTTGAAGTGGGCGGAATATGTCATGTAGCGGTGAAATGCATAGATATGACATAGAACACCGATCGCGAAGGCAGCTCACTAAACTAATACTGACGCTGAGG…
9a967ca4dbdae8eaad899cadcb7da8c2	D_0__Archaea;D_1__Euryarchaeota;D_2__Thermoplasmata;D_3__Marine Benthic Group D and DHVEG-1;D_4__uncultured archaeon;D_5__uncultured archaeon;D_6__uncultured archaeon	GCGCGAAAACTTCACACTGTGCGAAAGCACGATGAGGGGATCCCAAGTGCTTGCTCGTAAGAGTAAGCTGTTTCTTTGTTTAAAATGCATTGAGAGTAAGGGCTGGGTAAGACGGGTGCCAGCCGCCGCGGTAATACCTGCAGCTCAAGTGGTGACCGCTATTATTGGGCCTAAAACGTCCGTAGCCGGTTTAATAAATGCCTGGGTAAATCGTGTAGCTTAACTATACGAATTCCGGGTAGACTGTTAAGCTTGAGACCGGGAGAAGTTAGAGGTACTCCTGGGGTAGAGGTGAAATTCTGTAATCCTAGGGGGACCACCAGTGGCGAAGGCGTCTGACTAGAACGGGTCTGACGGTGAGGGACGAAGCCCTGGGGCGCAAACC
2a2adb218e61e28649f617466e967ac1	D_0__Bacteria;D_1__Lentisphaerae;D_2__Oligosphaeria;D_3__Oligosphaerales;D_4__Lenti-02	TCGAGAATCATCCGCAATGGGCGAAAGCCTGACGGTGCGATGCCGCGTGAGGGATGACGGCCTTCGGGTTGTAAACCTCTGTCAGAAGGGACGAAGAAGTGACGGTACCTTCAGAGGAAGCCACGGCTAACTACGTGCCAGCAGCCGCGGTAATACGTAGGTGGCGAGCGTTATTCGGATTTACTGGGCGTAAAGGGTCCGCAGGGGGTTTGCCAAGTCTGGTGTGAAATCTCACGGCTCAACTGTGAAACTGCACTGGATACTGGTGAACTGGAGTCTGCGAGGGGTGAGCGGAATTCCTGGTGTAGCGGTGGAATGCGTAGATATCAGGAAGAACACCGATGGCGAAGGCGACTCACTGGCGCAGTACTGACCCTCATGGACGAAAGCGTGGGGAGC…
aa258e8d4780824974d2bdbe4312e83d	D_0__Bacteria;D_1__Proteobacteria;D_2__Gammaproteobacteria;D_3__Tenderiales;D_4__Tenderiaceae;D_5__Candidatus Tenderia;D_6__Candidatus Tenderia electrophaga	TGGGGAATATTGGACAATGGGCGAAAGCCTGATCCAGCAATGCCGCGTGTGTGAAGAAGGCCTTCGGGTTGTAAAGCACTTTCAGCAGGGAGGATAATGACGTTACCTGCAGAAGAAGCACCGGCTAACTTCGTGCCAGCAGCCGCGGTAATACGAAGGGTGCAAGCGTTAATCGGAATTACTGGGCGTAAAGCGCGCGTAGGTGGTTTGGTAAGTCAGATGTGAAAGCCCTAGGCTCAACCTGGGAATTGCATTTGATACTGCTAGGCTAGAGTATGATAGAGGGAAGCGGAATTCCAGGTGTAGCGGTGAAATGCGTAGATATCCCGAGGAACATCAGTGGCGAAGGCGACTTGCTGGTCTAATACTGACGCTGAGGAGCGAAAGCGTGGGGAGCAA…
2c6f01ef4c06c806a20df7d5eb0d1e34	D_0__Bacteria;D_1__Planctomycetes	TCGAGAATCTTCCGCAATGGGCGAAAGCCTGACGGAGCGACGCCGCGTGGACGATGAAGGCCTTCGGGTTGTAAAGTCCTTTCGCGCAGGAGGAAAACCAGGGTGTTAATAGCGCCTTGTTTGACGTTACTGCGTAAAGAAGCTCCGGCTAACTTCGTGCCAGCTGCCGCGGTAAGACGAAGGGAGCGAGCGTTGTTCGGAATCACTGGGCATAAAGGGCACGCAGGCGGCCTGGTAAGTTGGATGTGAAATCCCCTGGCTCACCCAGGGAACTGCATTCAATACTGCCGGGCTTGAGGTCGGGAGGGGAGAGTGGAACTCCTAGTGTAGCGGTGAAATGCGTAGATATTAGGAGGAACGCCGGTGGCGAAAGCGACTCTCTGGCCCGATTCAGACGCT…
88dc53b2d894da957426ade4140c4065	D_0__Bacteria;D_1__Bacteroidetes;D_2__Bacteroidia;D_3__Bacteroidales	TGAGGAATATTGCACAATGGGGGAAACCCTGATGCAGCAACGCCGTGTGAGTGAAGAATCAGTTTATCTGTGTAAAGCTCTGTTGAGAGGGACGAAAAAGAAGCTTAGGAGGCTTCATTGACGGTACCTTTTAAGAAAGCTCCGGCTAACTCCGTGCCAGCAGCCGCGGTAATACGGAGGATGCAAGCGTTATCCGGATTTATTGGGTTTAAAGGGTGCGTAGGCGGAAAAATAAGTCAGTGGTGAAATCTTGCAGCTTAACTGTAAAACTGCCATTGATACTGTTTTTCTTGAGTATAGTTGAGGTAGGCGGAATGTGTAATGTAGCGGTGAAATGCTTAGATATTACACAGAACACCGATTGCGTAGGCAGCTTACTAAGCTATAACTGACGCTGAG…
7cee53f335f4c40d716a9c7039431957	D_0__Bacteria;D_1__Bacteroidetes;D_2__Bacteroidia;D_3__Chitinophagales;D_4__Saprospiraceae;D_5__uncultured	TAAGGAATATTGGACAATGGGCGCAAGCCTGATCCAGCCATCCCGCGTGCAGGAAGAATGCCCTATGGGTTGTAAACTGCTTTTATCAGGGAAGAAACTCTTGGATTTATCCGAGGCTGACGGTACCTGAAGAATAAGCACCGGCTAACTCCGTGCCAGCAGCCGCGGTAATACGGAGGGTGCAAGCGTTATCCGGATTTACTGGGTTTAAAGGGTGCGTAGGCGGCGGTTCAAGTCAGGAGTGAAAGTTTGCGGCATAACCGCAGAATTGCTTTTGATACTGGATTGCTTGAATTAGGTTGAGGTTAGCGGAATGTGGCATGTAGCGGTGAAATGCATAGATATGCCATAGAACACCGATTGCGAAGGCAGCTAACTGGACCTGGATTGACGCTGAGG…
73dbefa6487007734cae2ac96d62cc24	D_0__Bacteria;D_1__Proteobacteria;D_2__Gammaproteobacteria;D_3__Cellvibrionales;D_4__Halieaceae;D_5__Halioglobus;D_6__bacterium enrichment culture clone 71	TGGGGAATATTGCGCAATGGGGGCAACCCTGACGCAGCCATGCCGCGTGTGTGAAGAAGGCCCTAGGGTTGTAAAGCACTTTCAATTGGGAAGAAAAGTTAGTCGTTAATAACGGCTAGCCCTGACATTACCTTTAGAAGAAGCACCGGCTAACTCCGTGCCAGCAGCCGCGGTAATACGGAGGGTGCGAGCGTTAATCGGAATTACTGGGCGTAAAGCGCGCGTAGGCGGTTTGTTAAGTCAGCTGTGAAAGCCCTGGGCTCAACCTGGGAACTGCAGTTGATACTGCCGACTAGAACCAAGCTAAGGTAGGCGGAATGTGACATGTAGCGGTGAAATGCATAGATATGTCATAGAACACCAATTGCGAAGGCAGCTTACTAGACTTGTATTGACGCT…
85b59a1c659a240e4d4d8d9b85f42d5e	D_0__Bacteria;D_1__Bacteroidetes;D_2__Bacteroidia;D_3__Bacteroidales;D_4__SB-5	TGAGGAATATTGGGCAATGGGCGCAAGCCTGACCCAGCCATGCCGCGTGCAGGAAGACAGTCCTACGGGTTGTAAACTGCTTTTATACGGGAAGAATCCTATGCTCGTGAGCGTAGTTGACGGTACCGTAAGAATAAGCATCGGCTAACTCCGTGCCAGCAGCCGCGGTAATACGGAGGATGCAAGCGTTATCCGGATTCATTGGGTTTAAAGGGTGCGTAGGCGGAAGAATAAGTCAGTGGTGAAATCTTGCAGCTTAACTGTAAAACTGCCATTGATACTGTTTTTCTTGAGTATAGTTGAGGTAGGCGGAATGTGTAATGTAGCGGTGAAATGCTTAGATATTACACAGAACACCGATTGCGTAGGCAGCTTACTAAACTATAACTGACGCTGAGG…
f38063022b51867f68451341a2f6b396	D_0__Bacteria;D_1__Actinobacteria;D_2__Acidimicrobiia;D_3__Microtrichales;D_4__Microtrichaceae;D_5__uncultured;D_6__uncultured bacterium	TGGGGAATCTTGCACAATGGGCGAAAGCCTGATGCAGCGACGCCGCGTGGGGGATGAAGGCCCTAGGGTCGTAAACCCCTTTCAGGAGGGACGAAAATGACGGTACCTCCAGAAGAAGGTCCGGCCAACTACGTGCCAGCAGCCGCGGTAAGACGTAGGGACCAAGCGTTATCCGGATTTATTGGGCGTAAAGAGCTCGTAGGCGGTTGCGTAAGTCGGATGTGAAAACTCGAGGCTCAACCTCGAGACGCCATCCGATACTGCGCTGACTTGAATCCAGTAGGGGAGTGTGGAATTTGTTGTGTAGCGGTGAAATGCGCAGATATGACAAGGAACACCTATGGCGAAGGCAGCACTCTGGGCTGGTATTGACGCTGAGGAGCGAAAGCATGGGTAGCA…
5cb119d4c90a1ae938051f3db2a935db	D_0__Bacteria;D_1__Bacteroidetes;D_2__Bacteroidia;D_3__Bacteroidetes VC2.1 Bac22;D_4__uncultured organism;D_5__uncultured organism;D_6__uncultured organism	TGAGGAATATTGGTCAATGGACGCAAGTCTGAACCAGCCATGCCGCGTGCAGGATGACGGCCCTATGGGTTGTAAACTGCTTTTATTAAGGAATAAACCCTCCTACGTGTAGGAGGCTGAACGTACTTAAAGAATAAGCATCGGCTAACTCCGTGCCAGCAGCCGCGGTAATACGGAGGATGCAAGCGTTATCCGGATTCATTGGGTTTAAAGGGTTCGCAGGCGGCGTATTAAGTCAGTGGTGAAATCTCTCGGCTCAACCGAGAAACTGCCATTGATACTGGTATGCTAGAGTATAGTTGGCGTAGGCGGAATGTATCATGTAGCGGTGAAATGCTTAGATATGATACAGAACACCGATCGCGAAGGCAGCTTACGAAACTATAACTGACGCTCAGG…
fe93636043d9d5463a7b8c3794d80ab1	D_0__Bacteria;D_1__Proteobacteria;D_2__Deltaproteobacteria;D_3__Myxococcales;D_4__Nannocystaceae;D_5__uncultured;D_6__uncultured delta proteobacterium	TGGGGAATATTGCGCAATGGGCGAAAGCCTGACGCAGCCACGCCGCGTGTGCGATGAAGGCTTTCGGGTCGTAAAGCACTGTGGGGGGAGAAGAATCAAGCCGGTGAAGAGCCGGCCCTGACGGTATCCCTTTAGCAAGCACCGGCTAACTCCGTGCCAGCAGCCGCGGTAATACGGAGGGTGCAAACGTTGCTCGGAATCATTGTGCGTAAAGCGCACGTAGGCGGCTTGGCAAGTTGGATGTGAAAGCCCAGGGCTCAACCCTGGAAGTGCACCCAAAACTGCCAAGCTAGAGTTCCGGAGGGGTTCAGAGAATTCCTGGTGTAGAGGTGAAATTCGTAGATATCAGGAGGAATACCAGTGGCGAAGGCGCTGGACTGGACGGATACTGACGCTGAG…
1b26c9c43c3289a78ce683d8c089ab25	D_0__Bacteria;D_1__Planctomycetes;D_2__Phycisphaerae;D_3__Phycisphaerales;D_4__Phycisphaeraceae;D_5__uncultured;D_6__uncultured deep-sea bacterium	TAACGAATCTTCCGCAATGCGCGAAAGCGTGACGGAGCAATGCCGCGTGTAGGATGAAGCCTTTCGGGGTGTAAACTACTGTCAGGAACTAGGAAACAAATGACCAATTCCAAAGGAAGGGCCGGCTAACTTCGTGCCAGCAGCCGCGGTAATACGAAGGGCCCGAGCGTTGATCGGATTTACTGGGCTTAAAGAGTGCGTAGGCGGATGTGTAAGTGTCCTGTGAAATCCCACTGCTCAACGGTGGAACTGCGGGGCAAACTGCATATCTTGAGGTCGGTAGGGGCTGTCGGAACAATAGGTGTAGCGGTGAAATGCGTAGATATCTATTGGAACGCCAATGGCGAAGGCAGACAGCTGGGCCGATTCTGACGCTGAGGCACGAAAGCGTGGGGAGCA…
0361441813200ee95f977b8e74265e0f	D_0__Bacteria;D_1__Actinobacteria;D_2__Thermoleophilia;D_3__Gaiellales;D_4__uncultured;D_5__uncultured bacterium;D_6__uncultured bacterium	TGGGGAATCTTGCGCAATGGGCGAAAGCCTGACGCAGCAACGCCGCGTGCGGGAAGACGGCCTTAGGGTTGTAAACCGCTTTCAGGGGGGACGAAGCTTCCGAGGTTAATAGCCTACGGGGTGACGGTACCCCCAGAAGAAGCCCCGGCTAACTACGTGCCAGCAGCCGCGGTAATACGGAGGGTGCAAGCGTTGTTCGGAATTATTGGGCGTAAAGAGCGTGTAGGCGGCCAGGCAGGTCCGTTGTGAAAACTGAAGGCTCAACCTTCAGAGGTCGATGGAAACCGCTTGGCTAGAGTCCGGAAGAGGAGAGTGGAATTCCTGGTGTAGCGGTGAAATGCGCAGATATCAGGAAGAACACCCGTGGCGAAAGCGGCTCTCTGGGACGGTACTGACGCT…
6c443f5807ce8575115125e47f0814d2	D_0__Bacteria;D_1__Bacteroidetes;D_2__Bacteroidia;D_3__Flavobacteriales;D_4__Flavobacteriaceae;D_5__Lutibacter	TGAGGAATATTGGACAATGGAGGCAACTCTGATCCAGCCATGCCGCGTGCAGGAAGACGGCCCTATGGGTTGTAAACTGCTTTTATATGGGAAGAAACCCAGCTACGTGTAGCAGGCTGACGGTACCATAAGAATAAGCACCGGCTAACTCCGTGCCAGCAGCCGCGGTAATACGGAGGGTGCAAGCGTTATCCGGAATCATTGGGTTTAAAGGGTCCGTAGGCGGGCTAATAAGTCAGGGGTGAAATCCAACAGCTTAACTGTTGAACTGCCTTTGATACTGTTAGTCTTGAATTATATGGAAGTAGATAGAATGTGTAGTGTAGCGGTGAAATGCTTAGAGATTACACAGAATACCGATTGCGAAGGCAGTCTACTACGTATATATTGACGCTAATG…
93aeef37f737869a1d5f5016f3f93c25	D_0__Bacteria;D_1__Bacteroidetes;D_2__Bacteroidia;D_3__Flavobacteriales;D_4__Flavobacteriaceae;D_5__Eudoraea;D_6__uncultured bacterium	TGAGGAATATTGGACAATGGGCTCACGCCTGATCCAGCCATGCCGCGTGCAGGAAGACGGCCCTATGGGTTGTAAACTGCTTTTATACGGGAAGAATAAGGGACACGTGTGTCCTGGTGACGGTACCGTAAGAATAAGGACCGGCTAACTCCGTGCCAGCAGCCGCGGTAATACGGAGGGTCCGAGCGTTATCCGGAATTATTGGGTTTAAAGGGTCCGCAGGCGGGCAATTAAGTCAGGGGTGAAATGCTAGGGCTCAACCGTAGCACTGCCCTTGATACTGGTTGTCTTGAGTCATAGTGAAGTGGCCGGAATATGTAGTGTAGCGGTGAAATGCATAGATATTACATAGAACACCGATTGCGAAGGCAGGTCACTAACTATCGACTGACGCTGATG…
e8c2a52d5aa89d504fb5920975ee4751	D_0__Bacteria;D_1__Bacteroidetes;D_2__Bacteroidia;D_3__Sphingobacteriales;D_4__NS11-12 marine group;D_5__uncultured bacterium;D_6__uncultured bacterium	TAAGGAATATTGGACAATGGGCGCAAGCCTGATCCAGCCATGCCGCGTGCAGGATGACGGCCCTATGGGTTGTAAACTGCTTTTATATAGGAAGAAACCCCCCGACGTGTCGGGGGTTGACGGTACTATAAGAATAAGGGTCGGCTAACTCCGTGCCAGCAGCCGCGGTAATACGGAGGACCCAAGCGTTATCCGGATTTATTGGGTTTAAAGGGTGCGTAGGCGGATTAATAAGTCAGTGGTGAAAGCCTATAGCTTAACTATAGAATTGCCATTGAAACTGTTAATCTTGAGTTTGGTCGAGGTGGATGGAATGTATCATGTAGCGGTGAAATGCTTAGATATGATACAGAACACCGATTGCGAAGGCAGTCCACTAGGCCAATACTGACGCTGAGG…
31e6d63223bfa7528c20855d13d51b96	D_0__Bacteria;D_1__Proteobacteria;D_2__Gammaproteobacteria	TGGGGAATATTGGACAATGGGCGAAAGCCTGATCCAGCCATGCCGCGTGAGTGAATAAGGCCCTCGGGTCGTAAAGCTCTGTGGGGAGAGACGAAACCTTGTACGTTAATACCGTGCAAGCTGACGGTATCTCTTTAGCAAGCACCGGCTAACTCCGTGCCAGCAGCCGCGGTAATACGGAGGGTGCAAACGTTGCTCGGAATTATTGGGCGTAAAGCGCTCGTAGGCGGTTTGTTAAGTCGGATGTGAAAGCCCCGGGCTCAACCTGGGAACTGCATTCGATACTGGCAAACTAGAGTATAGAAGAGGCAAGTGGAATTCCGGGTGTAGCGGTGAAATGCGTAGATATCCGGAGGAACATCAGTGGCGAAGGCGACTTGCTGGTCTAATACTGACGCT…
5df0b962cbfbe47a605e358abfb9cf8b	D_0__Bacteria;D_1__Cyanobacteria;D_2__Oxyphotobacteria;D_3__Chloroplast	TGGGGAATTTTCCGCAATGGGCGAAAGCCTGACGGAGCAATACCGCGTGAGGGATGACGGCCTATGGGTTGTAAACCTCTTTTTTCAGGGAGGAATCAATGACGTTACCTGAAGAATAAGCATCGGCTAACTCCGTGCCAGCAGCCGCGGTAAGACGGAGGATGCAAGTGTTATCCGGAATCACTGGGCGTAAAGCGTCTGTAGGTGGTTTAATAAGTCAACTGTTAAATCTTGAGGCCCAACCTCAAAATCGCAGTCGAAACTATTAGACTAGAGTATAGTAGGGGTAAAGGGAATTTCCAGTGGAGCGGTGAAATGCGTAGATATCACGAGGAATACCCGTGGCGTAGGCAGGTAACTGGACGAGTACTGACGCTGAGGCACGAAAGCGTGGGGAGC…
757695cfa40a2469b9f30be79cf128a9	D_0__Bacteria;D_1__LCP-89;D_2__uncultured bacterium;D_3__uncultured bacterium;D_4__uncultured bacterium;D_5__uncultured bacterium;D_6__uncultured bacterium	TGAGGAATATTGCGCAATGGACGAAAGTCTGACGCAGCAACGCCGCGTGAGCGATGAAGCTATTCTTAGTGTAAAGCTCTGTTAGGAGGGAAGAACAATCCCGGCTTGTCGGGACTTGACGGTACCTCCAAAGAAAGCTCCGGCTAACTCCGTGCCAGCAGCCGCGGTAATACGGGGGGAGCAAGCGTTGTCCGGATTCATTGGGCGTAAAGGGCGTGTAGGTGGATTTGTAAGTGAGTGGTGAAATCCCGGGGCTTAACCCCGGAACTGCCATTCATACTGCAAGTCTTGAGTGCGGGAGAGGGAGATGGAATTCCTGGTGTAGCGGTGGAATGCGTAGATATCAGGAGGAACACCGGTGGCGAAGGCGGTCTCCTGGCCCGTAACTGACACTGAGGC…
94ab2cf2cc97d6f33bf3fd90b7099df0	D_0__Bacteria;D_1__Bacteroidetes;D_2__Bacteroidia;D_3__Cytophagales;D_4__Cyclobacteriaceae;D_5__uncultured;D_6__uncultured bacterium	TAGGGAATATTGGTCAATGGGGGCAACCCTGAACCAGCCATGCCGCGTGCAGGAAGACAGCCTTCTGGGTTGTAAACTGCTTTTATAGGGGAAGAACGTGTTCGATGCGTCGAATAATGACGGTACCCTAAGAATAAGCACCGGCTAACTCCGTGCCAGCAGCCGCGGTAATACGGAGGGTGCAAGCGTTGTCCGGATTTATTGGGTTTAAAGGGTGCGTAGGCGGGCCTATAAGTCAGTGGTGAAATACTTCAGCTCAACTGGAGAGGTGCCATAGATACTGTAGGCCTTGAGTGAAATTGAAGTAGGCGGAATTGATGGTGTAGCGGTGAAATGCATAGATATCATCAAGAACACCGATAGCGAAGGCAGCTTACTTAGTTTCAACTGACGCTGATG…
8aae9c1d8ba15b847d840d4330e77801	D_0__Bacteria;D_1__Proteobacteria;D_2__Deltaproteobacteria;D_3__Syntrophobacterales;D_4__Syntrophobacteraceae;D_5__uncultured;D_6__uncultured bacterium	TGGGGAATATTGCGCAATGGGCGAAAGCCTGACGCAGCAACGCCGCGTGAGGGATGAAGGCTTTAGAGTCGTAAACCTCTGTCGAATGGGAAGAAATCTTGACGGTACCATTAAAGGAAGCCCCGGCTAACTTCGTGCCAGCAGCCGCGGTAATACGAAGGGGGCAAGCGTTGTTCGGAATTATTGGGCGTAAAGAGCGTGTAGGCGGTCCGGTAAGTCAGATGTGAAAGCCCTGGGCTCAACCCAGGAAGTGCATTTGAAACTACCAGACTTGAGTACGGGAGAGGAGGGGGGAATTCCCGGTGTAGAGGTGAAATTCGTAGATATCGGGAGGAATACCAGTGGCGAAGGCGCCCCTCTGGACCGATACTGACGCTGAGACGCGAAAGCGTGGGGAGC…
03a746282763ab7039522836a59f1dc0	D_0__Bacteria;D_1__Chloroflexi;D_2__Dehalococcoidia	CAAGGAATATTGCGCAATGGGCGAAAGCCTGACGCAGCGACGTCGCGTGGGGGATGACGGTCTTCGGATTGTAAACCCCTTTTCTCAGGGAAGAATAATGACGGTACCTGAGGAATAAGTCTCGGCTAACTACGTGCCAGCAGCCGCGGTAATACGTAGGAGGCGAGCGTTATCCGGATTTACTGGGCGTAAAGAGGGCGTAGGCGGTCTTTCAAGTCGGATGTAAAATCTCCCGGCTCAACTGGGAGGGCGCATTCGATACTGTTAGACTTGAGGGCAGCAGAGGAAAGCGGAATTCCCAGTGTAGTGGTGAAATGCGTAGATATCGGGAGGAACACCAGTGGCGAAGGCGGCTTTCTGGGCTGCATCTGACGCTGAGGCCCGAAAGCGTGGGGAGCG…
f221b3e2a1c92862c769ac13a7ef60f1	D_0__Bacteria;D_1__Cyanobacteria;D_2__Oxyphotobacteria;D_3__Chloroplast;D_4__Vaucheria litorea;D_5__Vaucheria litorea;D_6__Vaucheria litorea	TGGGGAATTTTCCGCAATGGGCGCAAGCCTGACGGAGCAATACCGCGTGAGGGAGAAAGGCCTTCGGGTTGTAAACCTCTTTTATCAAGGAGGAAATTTTGACGTGTACTTGATGAATAAGCATCGGCTAACTCCGTGCCAGCAGCCGCGGTAAGACGGAGGATGCAAGTGTTATCCGGAATTATTGGGCGTAAAGCGTCTGTAGGTGGTTTAAAAAGTCGACGGTTAAATATTGAAGCTTAACTTCAAAACTGCCGTGGAAACTTTTAAACTAGAGTGTGATAGGGGTAGAGGGAATTTCCAGTGGAGTGGTGAAATGCGTAGATATTGGAAAGACCACCGATGGCGAAGGCACTCTACTGGGTCATTACTGACACTAAGAGACGAAAGCTAGGGGAG…
c3e5692c69664cd05e63f6d092c541c7	D_0__Bacteria;D_1__Bacteroidetes;D_2__Bacteroidia;D_3__Bacteroidales;D_4__Bacteroidetes BD2-2	TGAGGAATATTGGTCAATGGGCGAAAGCCTGAACCAGCCATGCCGCGTGCAGGATGAAGGCCCTATGGGTTGTAAACTGCTTTTATACGGGAAGAAACACCCCTACGTGTAGGGGCTTGACGGTACCGTAAGAATAAGCATCGGCTAACTCCGTGCCAGCAGCCGCGGTAATACGGAGGATGCAAGCGTTATCCGGATTTATTAGGTTTAAAGGGTGCGCAGGCGGAAATATAAGTCAGTGGTGAAATCCTACAGCTCAACTGTAGAACTGCCATTGATACTGTTTTTCTTGAGTGTAGTTGAGGTAGGCGGAATGTGTAGTGTAGCGGTGAAATGCATAGATATTACACAGAACACCGATTGCGAAGGCAGCTTACTAAGCTATGATCGACGCTGAGG…
04d6fd5ea0a1d4f51386adfd487da9c9	D_0__Bacteria;D_1__Fibrobacteres;D_2__Fibrobacteria;D_3__Fibrobacterales	TAGGGAATTTTGCGCAATGGGGGAAACCCTGACGCAGCAACGCCGCGTGGAGGATGACGTTTTTCGGAATGTAAACTCCTGTTGAGAGGGAAGAATGACTAATTGGTTGGTTCGACGGTACCTCTCGAGGAAGCCCCGGCTAACTTCGTGCCAGCAGCCGCGGTAATACGAAGGGGGCAAGTGTTGTTCGGATTTACTGGATGTAAAGGGGGTGCAGGCGGTTTAGTAAGTCAGAGGTGAAATACTCATGCTTAACGTGAGTACTGCCTTTGAAACTATTAATCTTGAGTGTTGGAGAGGGTAATGGAATTCCAGGTGTAGCGGTGGAATGCGTAGATATCTGGAAGAACACCAGTTGCGAAGGCGATTACCTGGCCAAACACTGACGCTGAGGCTCGA…
fba551af6b163c531ae4bec2c0d51e1e	D_0__Bacteria;D_1__Nitrospirae;D_2__Thermodesulfovibrionia;D_3__uncultured	TGAGGAATTTTGCGCAATGGGCGAAAGCCTGACGCAGCGACGCCGCGTGGAGGACGAAGGTCTTCGGATTGTAAACTCCTTTTGCAGGGGAAGATAATGACGGTACCCTGCGAATAAGCCACGGCTAACTCTGTGCCAGCAGCCGCGGTAAGACAGAGGTGGCAAGCGTTGTTCGGAATTACTGGGCTTAAAGGGCGCGTAGGCGGTGCAGCAAGTCCGGGGTGGAATCCTATGGCTCAACCTTAGAATTGCCTCGGAAACTGCTGTACTTGAGTCAGTGAGAGGAGGGCGGAATTCCTGGTGTAGCAGTGAAATGCGTAGATATCAGGAGGAAGGCCGGTGGCGAAGGCGGCCCTCTGGCGCTTGACTGACGCTGAGGCGCGAAAGCGTGGGTAGCAA…
50ce02e44983c9eb2345ca54f40fc22e	D_0__Bacteria;D_1__Fibrobacteres;D_2__Fibrobacteria;D_3__Fibrobacterales;D_4__Fibrobacteraceae;D_5__uncultured;D_6__uncultured bacterium	TGGGGAATTTTGCGCAATGGGGGAAACCCTGACGCAGCAACGCCACGTGTGGGATGACGCTTCTAGGAGTGTAAACCACTGTCGACAGGGAATAAACTAGGGTATTAATACTATCCTACTGAAGGTACCTGTAATAGGAAGCACCGGCTAACTTCGTGCCAGCAGCCGCGGTAATACGAGGGGTGCAAGCGTTGTTCGGAATCACTGGGCGTAAAGGGGGCGTAGGCGGAAAGCCAAGTCAGATGTTTAATTCCGGGGCCCAACCCCGGCTTTGCATTTGAAACTGGTTTTCTTGAATAAGTCAGAGGTAAACGGAATTCGTGGTGTAGCGGTGGAATGCGTAGATATCACGAAGAACACCTGTTGTGAAGACGGTTTACTGGGACTATATTGACGCTG…
dbbeb8023d4ba91bb16508587af053d8	D_0__Bacteria;D_1__Armatimonadetes;D_2__Fimbriimonadia;D_3__Fimbriimonadales;D_4__Fimbriimonadaceae;D_5__uncultured bacterium;D_6__uncultured bacterium	TTGGGAATCTTGCACAATGGGGGCAACCCTGATGCAGCGACGCCGCGTGGAGGATGACGGATTTAGGTCTGTAAACTCCTTTTATTGGGAAAGACTTAGGACGGTACCCAATGAATAAGCTCCGGCTAACTACGTGCCAGCAGCCGCGGTAATACGTAGGGAGCAAGCGTTGTCCGGATTTACTGGGCGTAAAGGGCGCGTAGGCGGCCTGTTAAGTATGAAGTGAAATCTCCAGGGCTCAACCCGGAAATTGCTTTGTAAACTGGCAGGCTAGAGGATGGTAGAGGTGAGTAGAATTCCAGGTGGACCGGTGGCATGGTTAGATATCTGGAGGAATACCAACGGCGAAGGCAGCTCACTGGACCATTCCTGACGCTGAGGCGCGAAAGCGTGGGTAGC…
a177d072aa06777a61ca83aaf354de7b	D_0__Bacteria;D_1__Bacteroidetes;D_2__Bacteroidia;D_3__Bacteroidales;D_4__Bacteroidetes BD2-2;D_5__uncultured gamma proteobacterium;D_6__uncultured gamma proteobacterium	TAGGGAATATTGCGCAATGGGCGAAAGCCTGACGCAGCGACGCCGCGTGGATGATGACGCCCTTCGGGGTGTAAAATCCTTTCAGTGGGGACGAACCGGTTCTTCGGAGCCCTGACGGTACCCACAGAAGAAGCACCGGCTAACTCCGTGCCAGCAGCCGCGGTAATACGGAGGATGCAAGCGTTATCCGGATTTATTGGGTTTAAAGGGTACGTAGGCGGAAAATTAAGTCAGTAGTGAAATCCTGCAGCTTAACTGTAGAACTGTTATTGATACTGGTTTTCTTGAATATAGTTGAGGTAGGCGGAATGTGTAATGTAGCGGTGAAATGCTTAGATATTACACAGAACACCGATTGCGAAGGCAGCTTACTAAGCTATGATTGACGCTGAGGTACGA…
50a379344b8294df68f6fb25535163cc	D_0__Bacteria;D_1__Bacteroidetes;D_2__Bacteroidia;D_3__Flavobacteriales;D_4__Flavobacteriaceae	TGAGGAATATTGGACAATGGAGGCAACTCTGATCCAGCCATGCCGCGTGCAGGAAGACTGCCCTATGGGTTGTAAACTGCTTTTATACAGGAAGAAACAGCTCTACGTGTAGAGCCTTGACGGTACTGTAAGAATAAGGATCGGCTAACTCCGTGCCAGCAGCCGCGGTAATACGGAGGATCCAAGCGTTATCCGGAATCATTGGGTTTAAAGGGTCCGTAGGTGGATAATTAAGTCAGAGGTGAAATCCTGCAGCTCAACTGTAGAATTGCCTTTGATACTGGTTATCTTGAGTTATTATGAAGTAGTTAGAATATGTAGTGTAGCGGTGAAATGCATAGATATTACATAGAATACCAATTGCGAAGGCAGATTACTAATAATATACTGACACTGATG…
11d26ab4b65cce77f53c8ee38dc8f8fa	D_0__Bacteria;D_1__Bacteroidetes;D_2__Bacteroidia;D_3__Flavobacteriales;D_4__Flavobacteriaceae	TGAGGAATATTGGTCAATGGGGGCAACCCTGAACCAGCCATGCCGCGTGCAGGATGACGGCCCTCTGGGTTGTAAACTGCTTTTGTGTAGGACTAATAAGGGGCTATACGCCCAGACGCATGTACTACAAGAATAAGGACCGGCTAACTCCGTGCCAGCAGCCGCGGTAATACGGAGGGTCCAAGCGTTATCCGGAATCATTGGGTTTAAAGGGTCCGTAGGCGGGCAATTAAGTCAGAGGTGAAATCCCACAGCTCAACTGTGGAACTGCCTTTGATACTGGTTGTCTTGAGTTACAGTGAAGTAGATAGAATATGTAGTGTAGCGGTGAAATGCATAGATATTACATAGAATACCGATTGCGAAGGCAGTCTACTAACTGTATACTGACGCTAATGG…
58bbb02725f4a8e5100ed6d05e214cbc	D_0__Bacteria;D_1__Bacteroidetes;D_2__Bacteroidia;D_3__Flavobacteriales;D_4__Flavobacteriaceae	TGAGGAATATTGGGCAATGGACGAGAGTCTGACCCAGCCATGCCGCGTGCAGGAAGACTGCCCTATGGGTTGTAAACTGCTTTTATATAGGAAGAAACCTATCCACGTGTGGATAGCTGACGGTACTATAAGAATAAGGATCGGCTAACTCCGTGCCAGCAGCCGCGGTAATACGGAGGATCCAAGCGTTATCCGGAATCATTGGGTTTAAAGGGTCCGTAGGTGGATAAATAAGTCAGAGGTGAAATCCTGCAGCTCAACTGTAGAACTGCCTTTGAAACTGTTTATCTTGAGTCATTATGAAGTGGTTAGAATGTGTAGTGTAGCGGTGAAATGCGTAGATATCGGGAGGAACACCTGTGGCGAAGGCGGTCTCCTGGGCCGGTACTGACGCTGAGG…
9dbf00c827d8e23b1ac0c0b665107f40	D_0__Bacteria;D_1__Bacteroidetes;D_2__Bacteroidia;D_3__Bacteroidales;D_4__Bacteroidetes BD2-2	TGAGGAATATTGGTCAATGGGCGCAAGCCTGAACCAGCCATGCCGCGTGAAGGATGACAGCGCTATGCGTTGTAAACTTCTTTTGTACAGGAAGAAACGCTTCTACGTGTAGAAGTCTGACGGTACTGTACGAATAAGCATCGGCTAACTCCGTGCCAGCAGCCGCGGTAATACGGAGGATGCAAGCGTTATCCGGATTTATTGGGTTTAAAGGGTACGTAGGCGGAAAATTAAGTCAGTAGTGAAATCCTGCAGCTTAACTGTAGAACTGTTATTGATACTGGTTTTCTTGAGTTCGGCAGAGGTAGGCGGAATGTGTAATGTAGCGGTGAAATGCTTAGATATTACACAGAACACCAATTGCGTAGGCAGCTACTATACCGACACTGACGCTGAGGC…
df5f3c7205badd99e89cc1554ec84931	D_0__Bacteria;D_1__Bacteroidetes;D_2__Bacteroidia;D_3__Bacteroidales;D_4__Bacteroidetes BD2-2;D_5__uncultured bacterium;D_6__uncultured bacterium	TGAGGAATATTGGGCAATGGACGCAAGTCTGACCCAGCCATGCCGCGTGAAGGAAGAAGGTGTTCTGCATCGTAAACTTCTTTTATATGGGAATAATGGTTTCTACGTGTAGAGATTTGAAGGTACCATATGAATAAGCATCGGCTAACTCCGTGCCAGCAGCCGCGGTAATACGGAGGATGCAGGCGTTATCCGGATTTATTAGGTTTAAAGGGTGCGTAGGTGGCCCGGTAAGTCAGTGGTGAAAGTTTGCAGCTTAACTGTAAAATTGCCATTGATACTGTCGGGCTTGAGTCTGGTGGAGGTAGGCGGAATGTGTAGTGTAGCGGTGAAATGCTTAGATATTACACAGAACACCGATTGCGAAGGCAGCTTACTATACCAGTACTGACACTGATG…
6eaa6bb11d8be6ed88f1c836a9a7b3cd	D_0__Bacteria;D_1__Spirochaetes;D_2__Leptospirae;D_3__Leptospirales;D_4__Leptospiraceae;D_5__RBG-16-49-21;D_6__uncultured bacterium	TTAAGAATCTTGCGCAATGGGCGAAAGCCTGACGCAGCGACGCCGCGTGGACGATGAAGGCCTTCGGGTTGTAAAGTCCAATAAGTAGGGAAGAATAAGCATAAGGTAATATTTTGTGTGATGACGGTACCTACCTAAAGCCCCGGCTAACTACGTGCCAGCAGCCGCGGTAATACGTATGGGGCAAGCGTTGTTCGGAATTATTGGGCGTAAAGGGCGTCTAGGCGGGAAATTAAGTTAGTTGTGAAATCCAAGGGCTTAACCCTTGAACTGCATCTAAAACTGATTTTCTTGAGTTCGGGAGAGGAGAGCGGAATTCCCGGTGTAGCGGTGAAATGCGTAGATATCGGGAAGAACACCAGTGGCGAAGGCGGCTCTCTGGCCTAGAACTGACGCTGA…
04b804bfb11396592ac89d7fa7d571e1	D_0__Bacteria;D_1__Proteobacteria;D_2__Alphaproteobacteria;D_3__Rhizobiales	TGGGGAATATTGGACAATGGGCGCAAGCCTGATCCAGCCATGCCGCGTGTGTGATGAAGGCCCTAGGGTTGTAAAGCACTTTCAGTCGTGAAGATAATGACATTAGCGACAGAAGAAGCCCCGGCTAACTTCGTGCCAGCAGCCGCGGTAATACGAAGGGGGCTAGCGTTGTTCGGAATCACTGGGCGTAAAGCGCACGTAGGCGGATACTTAAGTCAGGGGTGAAATCCCGGGGCTCAACCCCGGAACTGCCTTTGATACTGGGTATCTTGAGACCGAGAGAGGTGAGTGGAATTCCGAGTGTAGAGGTGAAATTCGTAGATATTCGGAGGAACACCAGTGGCGAAGGCGGCTCACTGGCTCGGTACTGACGCTGAGGTGCGAAAGCGTGGGGAGCAA…
ffb934e403fe4e2c512250cbfb8f5b08	D_0__Bacteria;D_1__Proteobacteria;D_2__Gammaproteobacteria;D_3__Ectothiorhodospirales;D_4__Ectothiorhodospiraceae;D_5__Thiogranum	TGGGGAATATTGGACAATGGGCGAAAGCCTGATCCAGCAATGCCGCGTGTGTGAAGAAGGCCTGCGGGTTGTAAAGCACTTTCAGATGGGAAGATAATGACGGTACCATCAGAAGAAGCACCGGCTAACTCTGTGCCAGCAGCCGCGGTAATACAGAGGGTGCAAGCGTTAATCGGAATTACTGGGCGTAAAGCGCGCGTAGGCGGTTTGTTAAGTCGGATGTGAAAGCCCTGGGCTCAACCTGGGAACTGCATTCGATACTGGCAAACTAGAGTATGAAAGAGGGAGGTAGAATTCCATGTGTAGCGGTGAAATGCGTAGATATGTGGAGGAATACCAGTGGCGAAGGCGGCCTCCTGGTTCAATACTGACGCTGAGGTGCGAAAGCGTGGGGAGCAA…
592d8ffc9b477b21c29fd55ead7744a8	D_0__Bacteria;D_1__Planctomycetes;D_2__OM190;D_3__uncultured bacterium;D_4__uncultured bacterium;D_5__uncultured bacterium;D_6__uncultured bacterium	TGAGGAATATTGGGCAATGGAGGCAACTCTGACCCAGCCATGCCGCGTGCAGGAAGACGGTCCTATGGATTGTAAACTGCTTTTATTTGTGAATAAACTCTCGGACGTGTCCGAGCCTGAATGTAGCAAATGAATAAGCACCGGCTAACTCTGTGCCAGCAGCCGCGGTAATACAGAGGGTGCAAACGTTGTTCGGAATTACTGGGCATAAAGCGCGCGTAGGCGGCCATGTAAGTGTGAAGTGAAAGCCCACGGCTCAACCGTGGAATTGCTTTGCATACTGCATGGCTCGAGGATGGTAGGGGAGAGCGGAACTCCTGGTGGAGCGGTGAAATGCGTAGATATCAGGAGGAACACCGGTGGCGAAGGCGGCTCTCTGGTCCATTTCTGACGCTGAGG…
bc28b91545b48a359f6b13b76dd51fb0	D_0__Bacteria;D_1__Actinobacteria;D_2__Coriobacteriia;D_3__CG2-30-50-142;D_4__Actinobacteria bacterium CG2_30_50_142;D_5__Actinobacteria bacterium CG2_30_50_142;D_6__Actinobacteria bacterium CG2_30_50_142	TGGGGAATATTGCGCAATGGGCGAAAGCCTGACGCAGCAACGCCGCGTGAGGGATGAAGGTTCTAGGATTGTAAACCTCTTTGATCAGGGAAGAAGCCGCAAGGTGACGGTACCTGAAGAACAAGCCCCGGCTAACTACGTGCCAGCAGCCGCGGTAATACGTAGGGGGCAAGCGTTGTCCGGAATCATTGGGCGTAAAGAGCGCGTAGGCGGTCTGTCAAGTTCGGTGTGAAATCTCGAGGCCTAACCTCGAGCGTGCATCGAAAACTGTCAGACTAGAGTTCGGCAGGGGAAACTGGAATTCCAAGTGTAGCGGTGAAATGCGCAGATATTTGGAAGAACACCGGTGGCGAAGGCGGGTTTCTGGACCGCAACTGACGCTGAGGCGCGAAAGCTAGG…
5a500a5308e8bbb4b92778276405f359	D_0__Bacteria;D_1__Planctomycetes;D_2__Planctomycetacia;D_3__Planctomycetales;D_4__uncultured;D_5__uncultured deep-sea bacterium;D_6__uncultured deep-sea bacterium	TCGAGAATCTTCCACAATGGGCGAAAGCCTGATGGAGCGACGCCGCGTGCGGGATGAAGGCCCTTGGGTTGTAAACCGCTGTCAGAGGGGATGAAATCCTTGGGGGCTATCCCCCTTGGTTGACAGAGCCTCAGAGGAAGCACGGGCTAAGTTCGTGCCAGCAGCCGCGGTAATACGAACTGTGCAAACGTTATTCGGAATCACTGGGCTTAAAGGGTGCGCAGGCGGCCCGATAAGTAGGATGTGAAATCTCCCGGCCCAACCGGGGAACTGCGTTCTAAACTGTCGGGCTTGAGTGAGATAGGGGTGTGCGGAACTTCTAGTGGAGCGGTGAAATGTGTTGATATTAGAAGGAACACCGGTAGCGAAAGCGGCACACTGGGTCTCAACTGACGCTCA…
d52fd04b006b4947028632089525d3bd	D_0__Bacteria;D_1__Planctomycetes;D_2__Pla3 lineage;D_3__uncultured planctomycete;D_4__uncultured planctomycete;D_5__uncultured planctomycete;D_6__uncultured planctomycete	TAAGGAATCTTGCACAATGGGCGAAAGCGTGACAGAGCGACGCCGCGTGCGGGATGAAGGCCTACGGGTTGTAAACCGCTGTCAGAGGCTATAAAATGTTGGGGTAACGATCCAACTTGATGTTAACCTCAGAGGAAGTCATGGCTAACTTCGTGCCAGCAGCCGCGGTAATACGAAGGTGGCAAGCGTTATTCGGAATCACTGGGCATAAAGGGCCTGTAGGCGGTCTATTAAGTTAATTGTGAAATCCCTCGGCTTAACCGAGGAATTGCTGTTAAAACTGGTAGACTAGAGTGTTGGAGGGGTAAGTGGAATTCTTGGTGGAGCGGTGGAATGCGTAGATATCAAGAGGAACGCCGGAGGCGAAAGCGACTTACTGGACAACTACTGACGCTGAGG…
ee247efd73d85d25edeaaa08160aa317	D_0__Bacteria;D_1__Bacteroidetes;D_2__Bacteroidia;D_3__Bacteroidales;D_4__Bacteroidetes BD2-2	TGAGGAATATTGGTCAATGGACGCAAGTCTGAACCAGCCATGCCGCGTGCAGGATGACAGCCCTATGGGTCGTAAACTGCTTTTATACAGGAAGAAAATATCCCACGTGTGGGAAACTGACGGTACTGTATGAATAAGCATCGGCTAACTCCGTGCCAGCAGCCGCGGTAATACGGAGGATGCAAGCGTTATCCGGATTTATTAGGTTTAAAGGGTGCGTAGGCGGAATTGTAAGTCAGTGGTGAAATCCTGCAGCTCAACTGTAGAACTGCCATTGATACTGCTATTCTTGAGTATAGTTGAGGTGGGCGGAATGTGTCATGTAGCGGTGAAATGCTTAGATATGACACAGAACACCAATTGCGTAGGCAGCTCACTAAACTATCACTGACGCTGAGG…
a08e69339d0bbd7bf125e3649b0e82b8	D_0__Archaea;D_1__Nanoarchaeaeota;D_2__Woesearchaeia;D_3__archaeon GW2011_AR13;D_4__archaeon GW2011_AR13;D_5__archaeon GW2011_AR13;D_6__archaeon GW2011_AR13	TTAGGAATATTTTGCAATGCGCGCAAGCGTGACAAATTGAGCCAGAGTGTTTTCCTTTTTGGAAAGCTTTTATGCACTGTAAAAAGGTGCAGGAATAAGGACTGGGTAAGACTAGTGCCAGCCGCCGCGGTAATACTAGCGGTCCAAGTCGCAGCCATTTTTATTGGGTCTAAAACATCCGTAGCTTGCTTGATAAGTTTCTCGTGAAATTTTGTATCTTAAATACGAAGCGTGCAAGGAGTACTGTCAAGCTAGAGACTGGGAGACGTAGGAAGTACATTCGGAGTAGCGGTTAAATGTTTTGATCCCGAATGGACTAACAATTAGCGAAGGCATCCTACGAGAACAGTTCTGACAGTCAGGGATGAAGGCTAGGGTCGCAAATG
55d8184738930943663d241c81130f04	D_0__Bacteria;D_1__Bacteroidetes;D_2__Bacteroidia;D_3__Chitinophagales;D_4__Saprospiraceae;D_5__Portibacter;D_6__uncultured bacterium	TAAGGAATATTGGACAATGGGCGAAAGCCTGATCCAGCCATCCCGCGTGTAGGATGACTGCCCTATGGGTTGTAAACTACTTTTGTTAGGGAAGAAACCCCTCGATTTATTGGGGGCTGACGGTACCTAAAGAATAAGCACCGGCTAACTCCGTGCCAGCAGCCGCGGTAATACGGAGGGTGCAAGCGTTATCCGGAATCACTGGGTTTAAAGGGTGCGTAGGCGGCATTATAAGTCAGAGGTGAAAGGCCACCGCTTAACGGTGGGACTGCCTTTGATACTGTAGAGCTTGAATAAGGTTGAGGTTAGCGGAATGAGTCATGTAGCGGTGAAATGCATAGATATGACTTAGAACACCAATTGCGAAGGCAGCTGGCTAGACCTTTATTGACGCTGAGG…
bd9281f40f8e62565f52dce838237f7f	D_0__Bacteria;D_1__Proteobacteria;D_2__Deltaproteobacteria;D_3__Myxococcales	TGGGGAATATTGCGCAATGGGCGAAAGCCTGACGCAGCAACGCCGCGTGAGTGACGAAGGCTTTCGGGTCGTAAAGCTCTGTCGCCTGGGACGAACAAGTCGCTTAACAAACGACTCTGACGGTACCAGGAAAGGAAGCACCGGCTAACTCTGTGCCAGCAGCCGCGGTAATACAGAGGGTGCAAACGTTGTTCGGAATTATTGGGCGTAAAGGGCGCGTAGGCGGTACTACAAGTCAGGTGTGAAATCCCATCTCTCAAGGATGGAACTGCGCTTGAAACTGTAGCACTAGAGTATCGGAGGGGGTGGCGGAATTCCCGGTGTAGAGGTGAAATTCGTAGATATCGGGAGGAACACCCGTGGCGAAGGCGGCCACCTGGACGAATACTGACGCTGAGG…
b79280e8666113d97b3c771a8aa54846	D_0__Bacteria;D_1__Fusobacteria;D_2__Fusobacteriia;D_3__Fusobacteriales;D_4__Leptotrichiaceae;D_5__Hypnocyclicus;D_6__Hypnocyclicus thermotrophus	TGGGGAATATTGGACAATGGACCACAAGTCTGATCCAGCAATTCTGTGTGCACGATGAAGGCTTTCGGGTTGTAAAGTGCTTTCAGCAGGGAAGAAGTAAGTGACGGTACCTGCAGAAGAAGCGACGGCTAAATACGTGCCAGCAGCCGCGGTAATACGTATGTCGCAAGCGTTATCCGGAATCACTGGGTATAAAGGGCGTCTAGGTGGATTATTAAGTCAGAGTTGAAAGGTAGCGGCTCAACCGTTAGACTGGCTTTGAAACTGGTAATCTAGAGTATGGAAGAGGAGGGCGGAACTACAAGTGTAGAGGTGAAATTCGTAGATATTTGTAGGAATGCCGATGACGAAGGTAGCTCTCTGGTCCAAAACTGACACTGAAGCGCGAAAGCTAGGGGA…
3a5cef838d1d5d8816615afac11d92cf	D_0__Bacteria;D_1__Bacteroidetes;D_2__Ignavibacteria;D_3__Ignavibacteriales;D_4__Melioribacteraceae;D_5__IheB3-7;D_6__uncultured Chlorobi bacterium	TGGGGAATATTGCGCAATGGGCGAAAGCCTGACGCAGCGACGCCGCGTGAGCGAAGAAGCTCTACGGAGTGTAAAGCTCTTTTGCACGGGAAGAAAACGGTTACAGACCAATTGACGGTACCGTGCGAATAAGCCCCGGCTAACTACGTGCCAGCAGCCGCGGTAATACGTAGGGGGCAAGCGTTGTCCGGATTTACTGGGTGTAAAGGGCGCGCAGGCGGACTTGTCAGTCAGGGGTGAAATCCTACAGCTCAACTGTAGAACTGCCTTTGATACTGCAAGTCTTGAGTTCGGAAGAGAGAGGCGGAATTCCAGGTGTAGTGGTGAAATACGTAGATATCTGGAAGAACACCAGAGGCGAAGGCGGTCTCTTGGTCCGATACTGACGCTGAGGCGCGA…
09424568ac036e9c7bef6109505263a4	D_0__Bacteria;D_1__Bacteroidetes;D_2__Bacteroidia;D_3__Flavobacteriales;D_4__Crocinitomicaceae;D_5__Crocinitomix;D_6__uncultured bacterium	TGAGGAATATTGGGCAATGGAGGCAACTCTGACCCAGCCATGCCGCGTGAAGGAAGAATGCCCTATGGGTTGTAAACTTCTTTTATTTGGGAAGAAACTTCTCTACGAGTAGAGAACTGACGGTACCAAACGAATAAGGACCGGCTAACTCCGTGCCAGCAGCCGCGGTAATACGGAGGGTCCAAGCGTTATCCGGAATCATTGGGTTTAAAGGGTTCGCAGGCGGCCTATTAAGTCAGTGGTGAAATCCCGTAGCTCAACTACGGAACTGCCATTGATACTGATGGGCTTGAATTAAGTTGGAGTAGGCGGAATGTGTAGTGTAGCGGTGAAATGCTTAGATATTACACAGAACACCGATAGCGAAGGCAGCTTACTGAACTTTTATTGACGCTCATG…
55d6da2afd89865697a4eabb790b5542	D_0__Bacteria;D_1__Proteobacteria;D_2__Deltaproteobacteria;D_3__NB1-j;D_4__uncultured bacterium;D_5__uncultured bacterium;D_6__uncultured bacterium	TGGGGAATATTGGACAACGGGCGAAAGCCTGATCCAGCCATCCCGCGTGAGTGATGAAGGCCCTCGGGTCGTAAAGCTCTGTGGAGAGGGACGAAAGAACATACGTTAATAGCGTGTGGAGTGACGGTACCTCCAAAGGAAGCACCGGCTAACTCCGTGCCAGCAGCCGCGGTAATACGGAGGGTGCAAGCGTTGTTCGGAATCATTGGGCGTAAAGCGGGTGTAGGCGGCTTGACAAGTCGGGTGTGAAATCCCTGGGCCCAACCCAGGAACTGCACTCGAAACTGTCTTGCTAGAGTCCCGGAGAGGGTGGCGGAATTCCCGGTGTAGAGGTGAAATTCGTAGATATCGGGAGGAACACCAGTGGCGAAGGCGGCCACCTGGACGGTGACTGACGCT…
6eed0a30590892e4bf7874fd32f4fc49	D_0__Bacteria;D_1__Planctomycetes;D_2__OM190	TCGAGAATCTTCCACAATGGGCGAAAGCCTGATGGAGCGACGCTGCGTGCAGGATGAAGGCCTTAGGGTTGTAAACTGCTGTCACGCTATAGGAAACTACAGGGGTTAATAGTCTCTGTACTGACCACAGCGAGAGGAAGTGCCGGCTAACTCCGTGCCAGCAGCCGCGGTAAGACGGAGGGCGCAAGCGTTGTTCGGAATCACTGGGCATAAAGAGCACGTAGGCGGCTCGCTCAGTCGGGTGTGAAAGCCCACGGCCCAACCGTGGAACTGCATCCGATACTGGCGAGCTTGAGGACGGAAGGGGTGAGTGGAACTCCAGGTGGAACGGTGAAATGTATAGATATCTGGAGGAACACCGGTGGCGAAAGCGGCTCACTGGTCCGTCTCTGACGCTGA…
c41c50fde7565cffb51f3d27c215e2cc	D_0__Bacteria;D_1__Bacteroidetes;D_2__Bacteroidia;D_3__Chitinophagales;D_4__Saprospiraceae;D_5__uncultured;D_6__uncultured Bacteroidetes bacterium	TAAGGAATATTGGACAATGGGCGCAAGCCTGATCCAGCCATCCCGCGTGCAGGAAGACGGTTCTATGAATTGTAAACTGCTTTTGTTAGGGAAGAACTCCCCGGACTTGTCCGGGGCTGACGGTACCTAAAGAATAAGCACCGGCTAACTCCGTGCCAGCAGCCGCGGTAATACGGAGGGTGCAAGCGTTATCCGGAATTACTGGGTTTAAAGGGTGCGTAGGCGGCGACGTAAGTCAGAAGTGAAAGTTGGCAGCTTAACTGCAAAATTGCTTTTGAAACTACGTTGCTTGAATCACGTTGAGGCTGGCGGAATGTGGCATGTAGCGGTGAAATGCTTAGATATGCCATAGAACACCAATTGCGAAGGCAGCTGGCTAGACGTGTATTGACGCTGAGG…
3032902da4ba012cbaa6d8048b0b7d70	D_0__Bacteria;D_1__Planctomycetes;D_2__Planctomycetacia;D_3__Planctomycetales;D_4__uncultured;D_5__uncultured bacterium;D_6__uncultured bacterium	TCGAGAATCTTCCGCAATGGGCGAAAGCCTGACGGAGCGACGCCGCGTGCGGGATGAAGGCCCTTGGGTTGTAAACCGCTGTCAGAGGGGATGAAATCACGGTTGGCTATCCTTCCGTGTTGACAGAGCCTCAAAGGAAGCACGGGCTAAGTACGTGCCAGCAGCCGCGGTAACACGTACTGTGCGAACGTTATTCGGAATCACTGGGCTTAAAGGGTGCGTAGGCGGCTAAGCAAGTCGGGTGTGAAATGCCTGGGCTCAACCGAGGCACTGCGCTCGAAACTGTTTAGCTTGAGTGAGATAGGGGTGTGTGGAACTGCTAGTGGAGCGGTGAAATGTGTTGATATTAGCAGGAACGCCGGTGGCGAAAGCGACACACTGGGTCTTAACTGACGCTGA…
d5b10b590e3b5cf0810734d7f1091bd0	D_0__Bacteria;D_1__Bacteroidetes;D_2__Ignavibacteria;D_3__Ignavibacteriales;D_4__PHOS-HE36;D_5__uncultured Chlorobi bacterium;D_6__uncultured Chlorobi bacterium	TGAGGAATATTGGGCAATGGGCGAAAGCCTGACCCAGCAACGCCGCGTGGAGGATGAATGTCGTAAGATTGTAAACTCCTGTTAGAGGGGAAGAATAATTCCGATCGAATCGGAACTTGACTGTACCCTCAGAGAAAGCTCCGGCTAACTACGTGCCAGCAGCCGCGGTAATACGTAGGGAGCAAGCGTTGTCCGGATTTACTGGGTGTAAAGGGCGCGCAGGCGGGTTGGTAAGTCAGAAGTGAAATCCTACAGCTTAACTGTAGAACTGCCTTTGATACTGCCAATCTTGAGTATGGAAGAGAGAGACGGAATTCCAGGTGTAGTGGTGAAATACGTAGATATCTGGAAGAACACCAGTTGCGAAGGCGGTCTCTTGGTCCAATACTGACGCTGAGG…
1978cace36600313128dda9e196f7a9b	D_0__Bacteria;D_1__Patescibacteria;D_2__ABY1;D_3__Candidatus Falkowbacteria	TCACGAATCTTCCACAATGGCCGAAGGGCTGATGGAGCAATGCCGCGTGTATGAAGACGCCCTTCGGGGTGTAAAATACTTTTATCTGGGACGAATCAATGACGGTACCAGATGAATAAGGGGCTGCTAACCTCGTGCCAGCAGCAGCGGTAATACGAGGGCCCCGAGCGTTGTCCGGATTTATTGGGCGTAAAGCGTCCGCAGGCTGTTTAGAACATCTCCTGTTAAATCCTGAGGCCTAACCTCAGGACCGCGAGAGATATGGCTAAACTAGAGGCCGGAAGAGGTAAGCGGAATTGTTGGTGTAGGGGTTAAATCCGTTAATATCAACAGGAACACCAAATGCGAAGGCAGCTTACTAGTACGAGCCTGACGCTCATGGACGAAAGCGTGGGTAGC…
669ac00b6bb6e6d870c0a9a46a7d6cd2	D_0__Bacteria;D_1__Proteobacteria;D_2__Alphaproteobacteria	TGGGGAATATTGCACAATGGAGGAAACTCTGATGCAGCCATGCCGCGTGAGTGAAGAAGGCCTTAGGGTTGTAAAACTCTTTCACCAGGGAAGATGATGACGGTACCTGGAGAAGAAGCACCGGCTAACTCCGTGCCAGCAGCCGCGGTAATACGGAGGGTGCTAGCGTTGTTCGGAATTACTGGGCGTAAAGGGCTCGCAGGCGGTAATGACAGTCAGAAGTGAAAGCCCCGGGCTCAACCTGGGAATTGCTTTTGAAACTTCATTACTTGAGTTCGAGAGAGGGTGGTGGAATTCCAAGTGTAGAGGTGAAATTCGTAGATATTTGGAAGAACACCAGTGGCGAAGGCGGCCACCTGGCTCGATACTGACGCTGAGGAGCGAAAGCGTGGGGAGCAA…
14f933320e4232400335eef6b08a8465	D_0__Bacteria;D_1__Chloroflexi;D_2__Anaerolineae;D_3__Anaerolineales;D_4__Anaerolineaceae;D_5__uncultured;D_6__uncultured Chloroflexi bacterium	TAGGGAATATTGCACAATGGGCGAAAGCCTGATGCAGCAACGTCGCGTGCGCGATGAAGGCCTTCGGGTTGTAAAGCGCTTTTCGGGGAGAAGAGGAAGGACGGTATCCCCGGAATAAGGTTCGGCTAACTACGTGCCAGCAGCCGCGGTAAAACGTAGGAACCGAGCGTTATCCGAATTTACTGGGCGTAAAGCGCGTGTAGGCGGTTCGGTAAGTTGGATGTGAAAGCTCCCGGCTCAACTGGGAGAGGACGTTCAATACTGTCGGACTAGAGGGCGGCAGAGGGAGGTGGAATTCCCGGTGTAGTGGTGAAATGCGTAGATATCGGGAGGAACACCAGAGGCGAAGGCGGCCTCCTGGGCCGCACCTGACGCTCAGACGCGAAAGCTAGGGGAGCG…
cd451c706409c840c0bb9a619da7fba7	D_0__Bacteria;D_1__Acidobacteria;D_2__Aminicenantia;D_3__Aminicenantales;D_4__uncultured bacterium;D_5__uncultured bacterium;D_6__uncultured bacterium	TGGGGAATTTTGCGCAATGGGCGAAAGCCTGACGCAGCGACGCCGCGTGGAGGATGAAGGCTTTCGAGTTGTAAACTCCTGTTAGAGGAGAAGAAAACCCGATTTATCGGGCTTGACGGTATCCTCAGAGAAAGCCCCGGCTAACTACGTGCCAGCAGCCGCGGTAATACGTAGGGGGCAAGCGTTGCTCGGAATTACTGGGCGTAAAGGGTGTGTAGGTGGCTGAGCAAGTCTTAGATGAAATCCCGAGGCCTACCCTCGGAACTGTCTTCGATACTGCTCAGCTTGAGGATGGTTGAGGAGAACGGAATTCCCGGTGGAGCGGTGAAATGCGTAGATATCGGGAGGAACACCAGAGGCGAAGGCGGTTCTCTGGGCCATTCCTGACACTGAGACACG…
f434a7c2d3e0cf0818d28ec154d5ebd1	D_0__Bacteria;D_1__Bacteroidetes;D_2__Ignavibacteria;D_3__Kryptoniales;D_4__BSV26;D_5__uncultured bacterium;D_6__uncultured bacterium	TGAGGAATATTGCGCAATGGCCGAAAGGCTGACGCAGCGACGCCGCGTGAGGGATGAAGTCCGTTAGGATGTAAACCTCTTTTGCAGGGGATGAACACGACGCTATATGCGTTGGATGACCGTACCCTGCGAATAAGGATCGGCTAACTACGTGCCAGCAGCCGCGGTAATACGTAGGATCCGAGCGTTGTCCGGATTTACTGGGTGTAAAGGGCGTGTAGGTGGGCCTTTAAGTCGGTGGTGAAATCTCACAGCTCAACTGTGAAACTGCCGTCGATACTGGAGGTCTTGAGTGCGGAGGAGGGAAGTGGAATTCATGGTGTAGCGGTGAAATGTGTAGATATCATGAAGAACACCGGTAGCGAAGGCGGCTTCCTGGTCCGCAACTGACACTGAGGC…
115c5cac6261e280d94dcbae7bb7c31b	D_0__Bacteria;D_1__Nitrospirae;D_2__Thermodesulfovibrionia;D_3__Thermodesulfovibrionales;D_4__Thermodesulfovibrionaceae;D_5__Thermodesulfovibrio;D_6__uncultured bacterium	TGGGGAATTTTGCGCAATGGGGGAAACCCTGACGCAGCGACGCCGCGTGGAGGAAGAAGGCCTTCGGGTTGTAAACTTCTTTTGTAGGGGACAAGAGAGGATGGTACCCTACGAATAAGCCACGGCTAACTCTGTGCCAGCAGCCGCGGTAAGACAGAGGTGGCAAGCGTTGTTCGGAATTACTGGGCTTAAAGGGCGCGTAGGCGGTTAGGCAAGTCTGTTGTGGAATCTCGGGGCTCAACCCCGGGGCTGCGGCGGAAACTGTATAACTTGAGTGAGCGAGGGGAGGGCGGAATTCCCGGTGTAGCGGTGAAATGCGTAGATATCGGGAGGAAGGCCGGTGGCGAAGGCGGCCCTCTGGCGCTCAACTGACGCTGAGGCGCGAAAGCGTGGGGAGCA…
c730740128e21db68c7582ba6f401f90	D_0__Bacteria;D_1__Planctomycetes;D_2__Phycisphaerae;D_3__C86;D_4__uncultured planctomycete;D_5__uncultured planctomycete;D_6__uncultured planctomycete	CAACGAATATTCCGCAATGGGCGAAAGCCTGACGGAGCGACGCCGCGTGCAGGACGAAGCACCTCGGTGTGTAAACTGCTGTCAGGGATTAGGAAGCAAGTGACCAATCCCAAAGGAAGCCTCGGCTAACTCCGTGCCAGCAGCCGCGGTAATACGGAGGAGGCAAGCGTTGTTCGGAATTACTGGGCTTAAAGCGTGTGTAGGCGGGATGGAAGGTATTGCGTGAAAGCCCCCGGCTCAACCGGGGAATTGCGTGGTAAACCGTCATTCTTGAGGCCAGCAGGGGTACCTGGAACTTTGGGTGGAGCGGTGAAATGCGTAGATATCCAAGGGAACGCCGGTGGCGAAAGCGGGGTACTGGGCTGGTTCTGACGCTGAGACACGAAAGCGTGGGGAGCA…
95736cc1e0b4d721a23ce3e49825e5af	D_0__Bacteria;D_1__Bacteroidetes;D_2__Bacteroidia;D_3__Flavobacteriales;D_4__Cryomorphaceae;D_5__Owenweeksia;D_6__uncultured organism	TGAGGAATATTGGACAATGGGCGAAAGCCTGATCCAGCCATGCCGCGTGCAGGATGACAGCCCTACGGGTTGTAAACTGCTTTTATACAGGAATAAACCCCCGGACGTGTCCGGGGCTGAATGTACTGTAAGAATAAGGATCGGCTAACTCCGTGCCAGCAGCCGCGGTAATACGGAGGATCCAAGCGTTATCCGGATTCATTGGGTTTAAAGGGTCCGCAGGCGGATTATTAAGTCAGTGGTGAAATGCTGTCGCTTAACGATAGCACTGCCATTGATACTGGTAATCTTGAGTATAGTTGAGGTGGGCGGAATAAGTCATGTAGCGGTGAAATGCATAGATATGACTTAGAACACCGATTGCGAAGGCAGCTCACTAAACTATTACTGACGCTCAGG…
2facbe1f5ced5d39fce85580b4597568	D_0__Bacteria;D_1__Chlamydiae;D_2__Chlamydiae;D_3__Chlamydiales;D_4__Chlamydiaceae;D_5__uncultured;D_6__uncultured organism	TCGAGAATCATTCGCAATGGGGGAAACCCTGACGATGCGACGCCGTGTAAATGAAGAAGGCCTTCGGGTTGTAAAGTTTTTTCGCCTAAGAGCAAGGGATATACTGAGAAGGTATAGACTTGAGAGTACTAGGTAAAGAAGCACCGGCTAACTCCGTGCCAGCAGCTGCGGTAATACGGAGGGTGCAAGCATTAATCGGAATTATTGGGCGTAAAGAGCGCGTAGGCGGGAAGGTAAGTCAGATGTGAAATCCCGAAGCTCAACTTCGGAACGGCATCCGAAACTGCTTTTCTTGAGGATAGGCGGAGAAAGCGGAATTCCACGTGTAGCGGTGAAATGCGTAGATACGTGGAAGAACACCAGTGGCGAAGGCGGCTTTCTAGCTTATTCCTGACGCTA…
570450a4ef9cc314efc988c04245f8e8	D_0__Archaea;D_1__Nanoarchaeaeota;D_2__Woesearchaeia;D_3__uncultured euryarchaeote;D_4__uncultured euryarchaeote;D_5__uncultured euryarchaeote;D_6__uncultured euryarchaeote	GCGCGAAACCTTTACAATGCACGAAAGTGTGATAAGGGAACCCTGAGTGCTATAGTTATGCTATGGCTTTTGTTGAAAGTAAATATTTCGGCGAATAAGCGGTGGGTAAGACTGGTGCCAGCCGCCGCGGTAACACCAGCGCCGCAAGTAGTGACCACGTTTATTGGGCCTAAAGCGTTCGTAGCCGGTTTGGTAAATCTTTTGTGAAATCGTAGGGCTTAACTCTACGGCATGCAGAAGACACTACTAAACTAGAGACCGGGAGGAGTCGGAGGTATTCTGGGGGGAGCGGTAAAATGCGATAATCCCTAGAGGACCACCTGTGGCGAAGGCGTCCGACCAGAACGGTTCTGACGGTGAGGAACGAAAGCTAGGGGAGCGATTC
ec588caf7536ecac53e1de22f654b9ae	D_0__Bacteria;D_1__Bacteroidetes;D_2__Bacteroidia;D_3__Cytophagales;D_4__Cyclobacteriaceae;D_5__uncultured;D_6__uncultured sediment bacterium	TAGGGAATATTGGGCAATGGAGGCAACTCTGACCCAGCCATGCCGCGTGCAGGAAGACAGCTTTCTGAGTTGTAAACTGCTTTTATATAGGAACAAAGAGGCCATGCGTGGCAAGTTGCGTGTACTATATGAATAAGCACCGGCTAACTCCGTGCCAGCAGCCGCGGTAATACGGAGGGTGCAAGCGTTGTCCGGATTTATTGGGTTTAAAGGGTGCGTAGGTGGTTTTTTAAGTCAGTGGTGAAAGCCTACAGCTTAACTGTAGAGGTGCCATTGATACTGGAGAACTTGAGTATGGACGAGGTAGGCGGAATTTGTGGTGTAGCGGTGAAATGCATAGATACCACAAAGAACACCGATAGCGAAGGCAGCTTACTGGACCATAACTGACACTGAGGC…
668cddf4c428517bc4b730104b34b429	D_0__Bacteria;D_1__Planctomycetes;D_2__Planctomycetacia;D_3__Planctomycetales;D_4__uncultured	TCGAGAATCTTCCGCAATGGGCGAAAGCCTGACGGAGCGACGCCGCGTGGTGGATGAAGGCCCTTGGGTTGTAAACACCTGTCAGAGGGGATGAAGTCGTTGAAGGCTATCCTTCTTCGTTGACAAAGCCTCAGAGGAAGCCCGGGCTAAGTACGTGCCAGCAGCCGCGGTAACACGTACTGGGCGAGCGTTATTCGGAATCACTGGGCTTAAAGGGTCCGTAGGCGGCCTGCCAGGTCAGGTGTGAAATCTCCCGGCTCAACCGGGAAACAGCGCTTGAAACCGGCAGGCTTGAGTATTTCAGGGGTGAGTGGAACTTCTGGTGGAGCGGTGAAATGTGTTGAGATCAGAAGGAACGCCGGTGGCGAAAGCGACTCACTGGGGAATTACTGACGCTGA…
c8de95fffdad0c28d69c43fe8f2e5788	D_0__Bacteria;D_1__Bacteroidetes;D_2__Bacteroidia;D_3__Flavobacteriales;D_4__Flavobacteriaceae	TGAGGAATATTGGGCAATGGAGGCAACTCTGACCCAGCCATGCCGCGTGCAGGAAGACTGCCCTATGGGTTGTAAACTGCTTTTATACAGGAAGAAACTTATCCACGTGTGGATAACTGACGGTACTGTAAGAATAAGCACCGGCTAACTCCGTGCCAGCAGCCGCGGTAATACGGAGGGTGCAAGCGTTATCCGGAATCATTGGGTTTAAAGGGTCCGTAGGCGGGCGATTAAGTCAGAGGTGAAATCCCACAGCTTAACTGTGGAACTGCCTTTGATACTGGTCGTCTTGAGTTACAGTGAAGTAGATAGAATATGTAGTGTAGCGGTGAAATGCATAGATATTACATAGAATACCGATTGCGAAGGCAGTCTACTAACTGTATACTGACGCTAATG…
b02206dde181ac9c5a30f6642fbacc04	D_0__Bacteria;D_1__Patescibacteria;D_2__ABY1;D_3__Candidatus Kerfeldbacteria;D_4__uncultured bacterium;D_5__uncultured bacterium;D_6__uncultured bacterium	TCAAGAATCTTCCCCAATGGACGAAAGTCTGAGGGAGCGACGCCGCGTGATTGAAGAAGCTCTTCGGAGTGTAAAAATCTTTTCTAAGGGATGAACAAATGACAGTACCTTAGGAATAAGGGGCTGCTAACCTCGTGCCAGCAGCAGCGGTAATACGAGGGCCCCAAGCGTTATCCGGAATTATTGGGCGTAAAGCGTCTGTAGGCGGATTTTCAAGTTAAACGTTAAATCTTAGGGCTTAACCCTGAAACTGCGTTTAATACTGGAAGTCTAGAGGATGGGAGAGGCAAGTGGAATTGCCGGTGTAGTAGTATAATGCGTTAATATCGGCAGGAACACCAAATGCGAAGGCATCTTGCTAGAACATTCCTGACGCTGAGAGACGAAAGCGTGGGTAGC…
24ac93e7304fd9c1b48f4dd501ec8452	D_0__Bacteria;D_1__Proteobacteria;D_2__Gammaproteobacteria;D_3__Thiotrichales;D_4__Thiotrichaceae;D_5__Cocleimonas;D_6__uncultured gamma proteobacterium	TGGGGAATATTGCACAATGGCGAAAGCCTGATGCAGCCATGCCGCGTGTGTGAAGAAGGCTCTAGGGTTGTAAAGCACTTTCAATGAGGAGGAACGATTAGTAGTTAATACCTGCTAGTTTTGACGTTACTCATAGAAGAAGCACCGGCTAACTCCGTGCCAGCAGCCGCGGTAATACGGAGGGTGCAAGCGTTAATCGGAATTACTGGGCGTAAAGCGCGCGTAGGCGGTTAGATAAGTCAGATGTGAAAGCCCCGGGCTCAACCTGGGAACTGCATCTGATACTGTTTGACTAGAGTTTAGGAGAGGGAAGTAGAATTTCAGGTGTAGCGGTGAAATGCATAGAGATCTGAAGGAATACCAGTGGCGAAGACGACTTCCTGGCCTAGAACTGACGCT…
e10e2cb1d7488a8811773240e316aa9a	D_0__Bacteria;D_1__Bacteroidetes;D_2__Bacteroidia;D_3__Bacteroidales;D_4__Bacteroidetes BD2-2	TGAGGAATATTGGTCAATGGGCGAGAGCCTGAACCAGCCAAGTCGCGTGAAGGAAGACAGTTCTATGGATTGTAAACTTCTTTTTTAAGGGAATAAAACACACTACGTGTAGTGTCTTGTATGTACCTTACGAATAAGGATCGGCTAACTCCGTGCCAGCAGCCGCGGTAATACGGAGGATCCAAGCGTTATCCGGATTTATTGGGTTTAAAGGGTACGTAGGCGGAAAATTAAGTCAGTAGTGAAATCCTGCAGCTTAACTGTAGAACTGTTATTGATACTGGTTTTCTTGAATATAGTTGAGGTAGGCGGAATGTGTAATGTAGCGGTGAAATGCTTAGATATTACACAGAACACCGATTGCGAAGGCAGCTTACTAAGCTATGATTGACGCTGAGG…
afeab9f618670bb3e08fab227f972117	D_0__Bacteria;D_1__Planctomycetes;D_2__Planctomycetacia;D_3__Pirellulales;D_4__Pirellulaceae;D_5__Blastopirellula;D_6__uncultured bacterium	TCGAGAATCTTCCGCAATGGACGCAAGTCTGACGGAGCGACGCCGCGTGCGGGATGAAGGCCTTCGGGTTGTAAACCGCTGTCAGTGGGGTGGAAATCTCATGAAGCAATCTTCATGAGTTGACCTAACCGCAGAGGAAGTCCGGGCTAAGTACGTGCCAGCAGCCGCGGTAATACGTACCGGACGAACGTTATTCGGAATCACTGGGCTTAAAGAGTGCGTAGGCGGTCTAACAGGTGGGGTGTGAAATCCCGCGGCTCAACCGCGGAACTGCGCTCCAAACCGTTAGGCTTGAGGGAGACAGGGGTGAGCGGAACTGATGGTGGAGCGGTGAAATGCGTTGATATCATCAGGAACACCGGTGGCGAAGGCGGCTCACTGGGTCTCTTCTGACGCTGA…
c2955210b3f8c6549843f5dd7414306c	D_0__Bacteria;D_1__Bacteroidetes;D_2__Bacteroidia;D_3__Bacteroidales;D_4__Bacteroidetes BD2-2	TGAGGAATATTGGTCAATGGGGGCAACCCTGAACCAGCCATGCCGCGTGGAGGAAGACGGCCCTACGGGTTGTAAACTCCTTTTTTACGGGAGTAATGGTTTCTACGTGTAGAGATTTGAAGGTACCGTACGAATAAGCATCGGCTAACTCCGTGCCAGCAGCCGCGGTAATACGGAGGATGCAGGCGTTATCCGGATTTATTAGGTTTAAAGGGTGCGCAGGCGGTTCTTTAAGTCAGTGGTGAAAGTTTGCAGCTCAACTGTAAAATTGCCATTGATACTGGAGAACTTGAATTTGGTAGAGGTAGGCGGAATGTGTAGTGTAGCGGTGAAATGCTTAGATATTACACAGAACACCGATTGCGAAGGCAGCTTACTATGCCGATATTGACGCTGAGG…
994db7ff13a63b493d10edf2a50774b5	D_0__Bacteria;D_1__Proteobacteria;D_2__Deltaproteobacteria;D_3__NB1-j;D_4__uncultured bacterium;D_5__uncultured bacterium;D_6__uncultured bacterium	TGAGGAATATTGCGCAATGGGCGAAAGCCTGACGCAGCCACGCCGCGTGGAGGAAGACACCCCTACGGGGCGTAAACTCCTTTTGTGCGAGAAGAAGGCCTCGGTCGCCGAGGTTAGACGGTATCGCACGAATAAGCACCGGCTAACTCCGTGCCAGCAGCCGCGGTAATACGGAGGGAGCAAGCGTTGTTCGGAATTACTGGGCGTAAAGCGCGTGTAGGCGGCTTGGCAAGTCGAGTGTGAAATCCCGGGGCTCAACCCCGGAACTGCACCCGAAACTGCCAGGCTAGAGTCCCGGAGGGGGTGGCGGAATTTCCGGTGTAGAGGTGAAATTCGTAGATATCGGAAGGAACACCAGTGGCGAAGGCGGCCACCTGGACGGTGACTGACGCTGAGACG…
7f11e59d86e4870ca4658889257df128	D_0__Bacteria;D_1__Patescibacteria;D_2__Saccharimonadia;D_3__Saccharimonadales;D_4__uncultured bacterium;D_5__uncultured bacterium;D_6__uncultured bacterium	TAGGGAATCTTCCACAATGGGCGAAAGCCTGATGGAGCAACGCCGCGTGCAGGATGAATGCCTTCGGGTTGTAAACTGCTTTTATGGGTGAAGATTGTGACGGTAACCCATGAATAAGGATCGGCTAATTCCGTGCCAGCAGCCGCGGTCATACGGAAGATCCGAGCGTTATCCGGAATTACTGGGCGTAAAGAGATGCGTAGGTGGTATGTTAAGCGAATAGTGAAATTATCCGGCTCAACCGGGTAACTGTTATTCGAACTGATATTACTAGAGTACGAGAGAGGAAGTTGGAATTCCTAGTGTAGGAGTGAAATCCGTAGATATTAGGAGGAACACCAATGGCGAAGGCAGACTTCTGGCTCGTTACTGACACTGAGGCTCGAAAGCGTGGGGAGC…
24a9c64b0ea511aa4384a9c4b9a0ab9c	D_0__Bacteria;D_1__Proteobacteria;D_2__Alphaproteobacteria;D_3__Rhizobiales;D_4__Rhizobiaceae;D_5__Pseudahrensia;D_6__uncultured bacterium	TGGGGAATATTGGACAATGGGCGCAAGCCTGATCCAGCCATGCCGCGTGAGTGATGAAGGCCCTAGGGTTGTAAAGCTCTTTCAACGGTGAAGATAATGACGGTAACCGTAGAAGAAGCCCCGGCTAACTTCGTGCCAGCAGCCGCGGTAATACGAAGGGGGCTAGCGTTGTTCGGAATAACTGGGCGTAAAGCGCACGTAGGCGGATTGGAAAGTTAGAGGTGAAATCCCAGGGCTCAACCCTGGAACTGCCTTTAAAACTATCAGTCTAGAGGTCGAGAGAGGTGAGTGGAATTCCGAGTGTAGAGGTGAAATTCGTAGATATTCGGAGGAACACCAGTGGCGAAGGCGGCTCACTGGCTCGATACTGACGCTGAGGTGCGAAAGTGTGGGGAGCAA…
cdc9c10abde05e8d696dc347ed0261de	D_0__Bacteria;D_1__Bacteroidetes;D_2__Bacteroidia;D_3__Flavobacteriales;D_4__Cryomorphaceae;D_5__uncultured;D_6__uncultured deep-sea bacterium	TGAGGAATATTGGTCAATGGACGAAAGTCTGAACCAGCCATGCCGCGTGCAGGAAGAATGCCCTATGGGTTGTAAACTGCTTTTATATGGGAAGAATCCTTCCGACGTGTCGGAAGTTGACGGTACCATATGAATAAGCACCGGCTAACTCCGTGCCAGCAGCCGCGGTAATACGGAGGGTGCAAGCGTTATCCGGATTTATTGGGTTTAAAGGGTCCGTAGGCGGAATTGTAAGTCAGTGGTGAAAGCCCACAGCTCAACTGTGGAACTGCCATTGATACTGCTTTTCTTGAATATAGTTGAAGTGAACGGAATGTAACATGTAGCGGTGAAATGCATAGAGATGTTACAGAACACCAATTGCGAAGGCAGTTCACTAAGCTATTATTGACGCTAAGG…
a37cf1e42b7c147289553241e46849bc	D_0__Bacteria;D_1__Proteobacteria;D_2__Alphaproteobacteria;D_3__uncultured	TGGGGAATATTGGACAATGGGGGCAACCCTGATCCAGCCATGCCGCGTGAATGAAGAAGGCCTTAGGGTTGTAAAGTTCTTTCACCGGGGAAGATGATGACGGTACCCGGAGAAGAAGCCCCGGCTAACTCCGTGCCAGCAGCCGCGGTAAGACGGAGGGGGCTAGCGTTGTTCGGAATTACTGGGCGTAAAGGGCACGTAGGCGGCCTGTCTAGTCAGGCGTGAAAGCCCCGGGCTTAACCCGGGAATTGCGCTTGATACCGGCAGGCTCGAGTCCGGGAGAGGATAGTGGAATTCCCAGTGTAGAGGTGAAATTCGTAGATATTGGGAAGAACACCAGTGGCGAAGGCGGCTATCTGGACCGGTACTGACGCTGAGGTGCGAAAGCGTGGGGAGCAA…
d29c60499083ff07723a26091f1bceb3	D_0__Bacteria;D_1__Planctomycetes;D_2__Planctomycetacia;D_3__Pirellulales;D_4__Pirellulaceae	TCGAGAATCTTCGGCAATGGGCGCAAGCCTGACCGAGCGACGCCGCGTGCGGGATGAAGGCCTTCGGGTTGTAAACCGCTGTCAGAGGGGATGAAATGCTAGAGGGTACTCTCTCTAGTTTGACATAGCCTCAGAGGAAGGGCGGGCTAAGTTCGTGCCAGCAGCCGCGGTAAGACGAACCGCCCAAACGTTATTCGGAATCACTGGGCTTAAAGGGTGCGTAGGCGGCGCGACAAGTTGGGTGTGAAATCCCTCGGCTCAACCGAGGAACTGCGCCCAAAACTGTCGTGCTCGAGGGAGATAGAGGTAAGCGGAACTGATGGTGGAGCGGTGAAATGCGTTGATATTATCAGGAACACCGGTGGCGAAAGCGGCTTACTGGATCTCTTCTGACGCTGA…
e7c419597cdc4554f96f8fd7d3b87d43	D_0__Bacteria;D_1__Proteobacteria;D_2__Alphaproteobacteria;D_3__Rhizobiales;D_4__Methyloligellaceae;D_5__Methyloceanibacter;D_6__uncultured bacterium	TGGGGAATATTGGACAATGGGCGAAAGCCTGATCCAGCCATGCCGCGTGGGTGAAGAAGGCCCTAGGGTTGTAAACCCCTTTCAGCGGGGAAGATAATGACGGTACCCGCAGAAGAAGCCCCGGCTAACTCCGTGCCAGCAGCCGCGGTAATACGGAGGGGGCTAGCGTTGTTCGGAATTACTGGGCGTAAAGCGCGCGTAGGCGGACTTTCAAGTCAGGGGTGAAATCCCGAGGCTCAACCTCGGAACTGCCTTTGATACTGATCGTCTTGAGTCCGAGAGAGGTGAGTGGAATTCCTAGTGTAGAGGTGAAATTCGTAGATATTAGGAAGAACACCAGTGGCGAAGGCGGCTCACTGGCTCGGTACTGACGCTGAGGCGCGAAAGCGTGGGGAGCAA…
53a905770c8fff91c57af8d7ae5fbd5c	D_0__Bacteria;D_1__Bacteroidetes;D_2__Bacteroidia;D_3__Flavobacteriales;D_4__Cryomorphaceae;D_5__uncultured;D_6__uncultured bacterium	TGAGGAATATTGCGCAATGGAGGAAACTCTGACGCAGCCATGCCGCGTGAAGGAATGAATGCCCTATGGGTTGTAAACTTCTTTTATGTAGGAAGAAATACAGATACGTGTATCTGTTTGACGGTACTACACGAATAAGGACCGGCTAACTCCGTGCCAGCAGCCGCGGTAATACGGAGGGTCCAAGCGTTATCCGGATTCATTGGGTTTAAAGGGTTCGTAGGTGGATCAATAAGTCAGTGGTGAAAGCCCGAAGCTCAACTTCGGAACTGCCATTGATACTGTTGATCTTGAATTTGGTTGAAGTGGGCGGAATATGACATGTAGCGGTGAAATGCATAGATATGTCATGGAACACCAATAGTGAAGACAGCTCACTAAGCCAATATTGACACTGAT…
ba3460e7c3439cd974a5a55cf4c3a810	D_0__Bacteria;D_1__Proteobacteria;D_2__Gammaproteobacteria	TGGGGAATATTGGACAATGGGGGCAACCCTGATCCAGCCACGCCGCGTGAGTGATGAAGGCCCTCGGGTCGTAAAGCTCTGTGGAGAAGGAAGAATCCCCGCCGGCTAATACCCGGCGGGTTGACGGTACTTCTTTAGCAAGCACCGGCTAACTCCGTGCCAGCAGCCGCGGTAATACGGAGGGTGCGAGCGTTAATCGGAATTACTGGGCGTAAAGCGCGCGTAGGCGGCTTGGTCAGTCGGATGTGAAAGCCCCGGGCTCAACCTGGGAATTGCATTCGATACTGCCGAACTAGAGTATGGGAGAGGGAAGTGGAATTTCCGGTGTAGCGGTGAAATGCGTAGATATCGGAAGGAACACCAGTGGCGAAGGCGACTTCCTGGCCCAATACTGACGCT…
2b3c9566237df5bafea082283b2f1a88	D_0__Bacteria;D_1__Actinobacteria;D_2__Thermoleophilia;D_3__Gaiellales;D_4__uncultured	TGGGGAATCTTGCGCAATGGGCGAAAGCCTGACGCAGCAACGCCGCGTGCGGGAAGACGGCCTTAGGGTTGTAAACCGCTTTCAGGGGGGACGAAGCTTCCGAGGTTAATAGCCTACGGGGTGACGGTACCCCCAGAAGAAGCCCCGGCTAACTACGTGCCAGCAGCCGCGGTAATACGTAGGGGGCGAGCGTTGTCCGGAATCATTGGGCGTAAAGCGCGTGTAGGCGGCTTGGCAAGTCTGGTGTGAAATCTTGGGGCTCAACCCCAAGCGTGCACTGGAAACTGCCTCGCTAGAGTCCGGGAGAGGAGAGCGGAACTCCGAGTGTAGCGGTGAAATGCGCAGATATTCGGAAGAACACCAATGGCGAAGGCAGCTCTCTGGAACGGTACTGACGCT…
1e32b630edd422da41f325e5ed5d7f37	D_0__Bacteria	CTAAGAATCGTTCGCAATGGGGGAAACCCTGACGACGCAACACCGCGTGTGGGATGACGGCCTTCGGGTTGTAAACCACTGTGGAGAGGGAGGAAGTCCCGTTTATACGGGATTGACAGTACCTCTCTAGAAAGTCGCTGCTAACTACGTGCCAGAAGCCTCGGTAATACGTAGGCGGCAAGCGTTATCCGGAGTTACTGGGCGTAAAGGGACGCGTAGGCGGCATTGTCAGTTTAGTCTTAAAGACTGCGGCTCAACCGTAGATATGGACTGAATACTGCAGTGCTTGAGGAAGGTAGGGGAAGTCGGAACTCCCGGTGTAGCAGTGAAATGCGTTGATATCGGGAGGAACACCAAAGGCGAAGGCAGACTTCTGGGCCATTCCTGACGCTGAGGCTC…
0e36d2eda415ca879836b62e4790943c	D_0__Bacteria;D_1__Bacteroidetes;D_2__Bacteroidia;D_3__Sphingobacteriales;D_4__Lentimicrobiaceae	TGAGGAATATTGGTCAATGGGCGCAAGCCTGAACCAGCCATGCCGCGTGCAGGATGACGGCCTTATGGGTTGTAAACTGCTTTTATATAGGAAGAAACCCTTCTATTTTTAGGAGGCTGACGGTACTATAGGAATAAGGATCGGCTAACTCCGTGCCAGCAGCCGCGGTAATACGGAGGATCCAAGCGTTATCCGGATTTATTGGGTTTAAAGGGTGCGTAGGTGGACTAATAAGTCAGAGGTGAAATCCCACAGCTCAACTGTGGAACTGCCTTTGAAACTGTTAGTCTTGAGTATATTTGGAGTGGGCGGAATGTGTTATGTAGCGGTGAAATGCATAGATATAACACAGAACACCGATCGCGAAGGCAGCTCACTAAACTATTACTGACACTGATG…
acd0cd8aa76a12c03bb442b0be14f9e5	D_0__Bacteria;D_1__Planctomycetes;D_2__Planctomycetacia;D_3__Planctomycetales;D_4__Gimesiaceae;D_5__uncultured;D_6__uncultured bacterium	TCGAGAATCTTCGGCAATGGACGAAAGTCTGACCGAGCGACGCCGCGTGCGGGATGAAGGCCCTTGGGTTGTAAACCGCTGTCAGAGGGGATGAAATTCTAGAAGGCAATCCTTCTAGATTGACAGAGCCTCAGAGGAAGCACGGGCTAAGTACGTGCCAGCAGCCGCGGTAATACGTACTGTGCGAACGTTATTCGGAATCACTGGGCTTAAAGGGTGCGTAGGCGGCCAGATAAGTAGGGTGTGAAATCCCTCGGCTCAACCGAGGAATTGCGCTCTAAACTGTTTGGCTTGAGTAAGATAGGGGTGTGCGGAACTTCCAGTGGAGCGGTGAAATGTGTTGATATTGGAAGGAACTCCGGTGGCGAAGGCGGCACACTGGGTCTTAACTGACGCTGA…
02acb8817addcb905248024df6e48778	D_0__Bacteria;D_1__Epsilonbacteraeota;D_2__Campylobacteria;D_3__Campylobacterales;D_4__Sulfurovaceae;D_5__Sulfurovum	TGAGGAATTATTCGCAATGGGGGAAACCCTGACGATGCAACACCGCGTGGGGGATGACGGTCTTTTGATTGTAAACTCCTTTTTTGAGGGAATAAATATGAAGGTACCTCAAGAATAAGCACCGGCTAACTCCGTGCCAGCAGCCGCGGTAATACGGAGGGTGCAAGCGCTACTCGGAATCACTGGGCGTAAAGCGCGCGCAGGCGGCCTTTTAAGTTGGATGTGAAAGCCTATGGCTCAACCATAGAACTGCATCCAAAACTATCAGGCTAGAGTGTGGGAGAGGAAGATGGAATTAGTTGTGTAGGGGTAAAATCCGTAGAGATAACTAGGAATACCAAAAGCGAAGGCAATCTTCTGGAACATTACTGACGCTGAGGCGCGAAAGCGTGGGGAGCA…
72c6053e914ebfab6fdab4680ae273ce	D_0__Bacteria;D_1__Acidobacteria;D_2__Subgroup 21;D_3__uncultured Acidobacterium sp.;D_4__uncultured Acidobacterium sp.;D_5__uncultured Acidobacterium sp.;D_6__uncultured Acidobacterium sp.	TGGGGAATTTTGCGCAATGGGGGAAACCCTGACGCAGCAACGCCGCGTGAAGGAAGAAGGCTTTCGAGTTGTAAACTTCTGTTTCGGGGGACGAAGAAGTGACGGTACCCCGGCAGCAAGCCCCGGCTAACTCCGTGCCAGCAGCCGCGGTAATACGGGGGGGGCGAGCGTTGTTCGGAATTACTGGGCGTAAAGGGCGCGTAGGCGGTACGAGAAGTTTCGGGTGAAAGCCCCGGGCTCAACCCGGGAAGGTCCCGGAAAACCATCGTACTGGAGTGCTGGAGGGGCAAGCGGAATTTCTGGTGTAGCGGTGAAATGCGTAGATATCAGAAGGAACATCAGAGGCGAAGGCGGCTTGCTGGACAGCAACTGACGCTGAGGCGCGAAAGCCAGGGGAGC…
75b896bb9e6e42a15545bcf45b25507b	D_0__Bacteria;D_1__Spirochaetes;D_2__Leptospirae;D_3__Leptospirales;D_4__Leptospiraceae;D_5__RBG-16-49-21	TTAAGAATCTTGCGCAATGAGCGAAAGCTTGACGCAGCGACGCCGCGTGGACGATGAAGGCCTTCGGGTTGTAAAGTCCGATAAGTAGGGAAGAATAAGACTCGGATAATACCCGAGTTGATGACGGTACCTACCTAAAGCCCCGGCTAACTACGTGCCAGCAGCCGCGGTAATACGTATGGGGCGAGCGTTGTTCGGAATTATTGGGCGTAAAGGGCGTCTAGGCGGGGAATTAAGTTATGTGTGAAATCCAAGGGCTCAACCCTTGAACTGCACCTAAAACTGATTCTCTTGAGTTCGGGAGAGGAGTGCGGAATTCCCAGTGTAGCGGTGAAATGCGTAGATATTGGGAAGAACACCAGTGGCGAAGGCGGCACTCTGGCCTAGAACTGACGCTGA…
9c128867e40e81fb71f4472db6b2b367	D_0__Bacteria;D_1__BRC1	TCTAGAGGCTTCTGCAATGGACGAAAGTCTGACAGAGCGACGCCGCGTGCGGGATCGAAGGCCGTGAGGTTGTAAACCGCTGTCAGCAGGGAAGAATGCCCGCGTTTACCACGCGGGAGAGACGGTACCTGCAGAGGAAGCCCCGGCTAACTCCGTGCCAGCAGCCGCGGTAATACGGAGGGGGCAAACGTTGTTCGGAATCACTGGGCGTAAAGAGTGCGTAGGCGGCTTGGCAAGTCTGGCGTTAAATCTCCCCGCTTAACGGGGAAGCAGCGTTGGAAACTGCCAGGATCGAGGATGGGAGAGGCAGGTGGAATTCCTGGTGTAGCGGTGAAATGTGTAGATATCAGGAAGAACACTCGTGGCGAAGGCGGCCTGCTGGCCCACTCCTGACGCTGA…
5974ee8ee1b3609e814fc781a1ac949a	D_0__Bacteria;D_1__Bacteroidetes;D_2__Bacteroidia;D_3__Flavobacteriales;D_4__Flavobacteriaceae;D_5__Aquibacter;D_6__uncultured bacterium	TGAGGAATATTGGGCAATGGAGGCAACTCTGACCCAGCCATGCCGCGTGCAGGAAGACTGCCCTATGGGTTGTAAACTGCTTTTATACAGGAAGAAACAGCTCTACGTGTAGAGCCTTGACGGTACTGTAAGAATAAGGATCGGCTAACTCCGTGCCAGCAGCCGCGGTAATACGGAGGATCCAAGCGTTATCCGGAATCATTGGGTTTAAAGGGTCCGTAGGTGGATAATTAAGTCAGAGGTGAAATCCTGCAGCTCAACTGTAGAATTGCCTTTGAAACTGGTTATCTTGAGTCATTATGAAGTGGTTAGAATGTGTAGTGTAGCGGTGAAATGCATAGATATTACACAGAATACCGATTGCGAAGGCAGATCACTAATAATGTACTGACACTGATG…
c858d76d058bb7402dcbd3daac8b4c00	D_0__Bacteria;D_1__Proteobacteria;D_2__Gammaproteobacteria;D_3__Gammaproteobacteria Incertae Sedis;D_4__Unknown Family;D_5__uncultured	TGGGGAATATTGCACAATGGGCGCAAGCCTGATGCAGCAATGCCGCGTGTGTGAAGAAGGCCTGCGGGTTGTAAAGCACTTTTATTAGGAAAGAAAAACGCGAAGTTAATACCTTCGAACTTGACGGTACCTAAAGAATAAGCACCGGCTAACTCAGTGCCAGCAGCCGCGGTAATACTGAGGGTGCAAGCGTTAATCGGAATTACTGGGCGTAAAGCGAGTGTAGGCGGCTTCGTAAGTCGGATGTGAAAGCCCTGGGCTTAACCTGGGAATGCCATTCGAAACTGCGCGGCTAGAGTCTGATAGAGGGAAGTGGAATTCCAGGTGTAGCGGTGAAATGCGTAGAGATCTGGAGGAACACCAGTGGCGAAGGCGGCTTCCTGGATCAAGACTGACGCT…
0bfe2cbbdc3a7dd70c5b2f8fd835701f	D_0__Bacteria;D_1__Proteobacteria;D_2__Alphaproteobacteria;D_3__Rhodobacterales;D_4__Rhodobacteraceae;D_5__uncultured	TGGGGAATCTTAGACAATGGGGGCAACCCTGATCTAGCGATGCCGCGTGAGTGATGAAGGCCCTAGGGTCGTAAAGCTCTTTCGCCAAGGATGATAATGACAGTACTTGGTAAAGAAACCCCGGCTAACTCCGTGCCAGCAGCCGCGGTAATACGGAGGGGGTTAGCGTTGTTCGGAATTACTGGGCGTAAAGCGCACGTAGGCGGACTGGAAAGTTGGGGGTGAAATCCCGGGGCTCAACCCCGGAACTGCCTCCAAAACTTCCAATCTAGAGATCGAGAGAGGTGAGTGGAATTCCAAGTGTAGAGGTGAAATTCGTAGATATTTGGAGGAACACCAGTGGCGAAGGCGGCTCACTGGCTCGATACTGACGCTGAGGTGCGAAAGCGTGGGGAGCAA…
5ff1161a09162443f97b9153cc68d3b8	D_0__Bacteria;D_1__Bacteroidetes;D_2__Bacteroidia;D_3__Bacteroidales;D_4__Marinifilaceae;D_5__Marinifilum;D_6__uncultured Bacteroidetes bacterium	TGAGGAATATTGGTCAATGGACGCAAGCCTGAACCAGCCATGTCGCGTGCAGGATGACGGCCCTATGGGTTGTAAACTGCTTTTTTACAGGAATAATTGTCGCTACGTGTAGTGATTTGAATGTACTGTATGAATAAGGATCGGCTAACTCCGTGCCAGCAGCCGCGGTAATACGGAGGATTCGAGCGTTATCCGGATTTATTGGGTTTAAAGGGTCCGTAGGCGGTCTTTTAAGTCAGTGGTGAAATCCCAGAGCTCAACTCTGGAACTGCCATTGAAACTGAAAGACTTGAATATGGTTGAGGTAGGCGGAATACGTTATGTAGCGGTGAAATGCATAGATATAACGTAGAACACCAATTGCGAAGGCAGCTTACTAAGCCATTATTGACGCTGATG…
88a73dbe5ce538196e4462c3b4897987	D_0__Bacteria;D_1__Bacteroidetes;D_2__Bacteroidia;D_3__Cytophagales;D_4__Amoebophilaceae;D_5__uncultured	TAGGGAATATTGGACAATGGGCGCAAGCCTGATCCAGCCATGCCGCGTGCAGGATGAAGGTCCTATGGATTGTAAACTGCTTTTATACAGGAAAAATAAGCCCTTGCGAGGGCTGATGATGGTACTGTAAGAATAAGCACCGGCTAACTCCGTGCCAGCAGCCGCGGTAAGACGGAGGGTGCAAGCGTTATCCGGATTCACTGGGTTTAAAGGGTACGTAGGCGGTCTTGTAAGTCGATGGTGAAATCTAGCAGCTCAACTGCTAACGTGCCATCGATACTGCTTGACTTGAGTATAGTCGAGGTGGGCGGAATTCTACATGTAGCGGTGAAATGCATAGATATGTAGAGGAATACCAGTGGCGAAGGCGGCTCCCTGGACCGGTACTGACGCTGAGGT…
73561f6cc333edf2b9937e2bd7f713ae	D_0__Bacteria;D_1__Bacteroidetes;D_2__Bacteroidia;D_3__Flavobacteriales;D_4__Cryomorphaceae;D_5__uncultured	TGAGGAATATTGGTCAATGGGCGCAAGCCTGAACCAGCCATGCCGCGTGCAGGAAGAATGCCCTATGGGTTGTAAACTGCTTTTATATAGGAAGAAACCCCTGAACGTGTTCGGGGCTGACGGTACTATATGAATAAGGACCGGCTAACTCCGTGCCAGCAGCCGCGGTAATACGGAGGGTCCAAGCGTTATCCGGATTTATTGGGTTTAAAGGGTGCGCAGGCGGAATATTAAGTCAGTGGTGAAAGCCCACAGCTCAACTGTGGAACTGCCATTGATACTGGTATTCTTGAATTTAGTTGAAGTTAGCGGAATGTAACATGTAGCGGTGAAATGCATAGATATGTTACAGAACACCAATTGCGAAGGCAGCTAACTAAGCTAATATTGACGCTCAGG…
b863dd70bb90a9fdf70f0940fc2d29a8	D_0__Bacteria;D_1__Proteobacteria;D_2__Deltaproteobacteria	TGGGGAATTTTGCGCAATGGGCGAAAGCCTGACGCAGCAACGCCGCGTGTGTGATGAAGGCCTTCGGGTTGTAAAGCACTGTCCAGAGGGAAGAACAAGCGGGGGTAACGCCCCGCCCTGACGGTACCTCTGAAGAAAGCACTGGCTAACTCCGTGCCAGCAGCCGCGGTAATACGGAGAGTGCGAGCGTTGTTCGGAATCATTGGGCGTAAAGGGCGTGTAGGCGGTTAGGCAAGTCAGGTGTGAAATCCCTTGGCTCAACCAAGGAAGTGCGCTTGAAACTGCTTAACTAGAGTACAGGAGGGGAAAGTGGAATTCCCAGTGTAGAGGTGAAATTCATAGATATTGGGAGGAACACCGGTAGCGAAGGCGGCTTTCTGGCCTGATACTGACGCTGAG…
796ca0c057982484f6f4e70c28d6315a	D_0__Bacteria;D_1__Bacteroidetes;D_2__Bacteroidia;D_3__Chitinophagales;D_4__Saprospiraceae;D_5__Portibacter;D_6__uncultured Bacteroidetes bacterium	TAAGGAATATTGGACAATGGGCGAAAGCCTGATCCAGCCATCCCGCGTGCAGGATGACGGCCCTACGGGTTGTAAACTGCTTTTTCAAGGGAAGAAACCCTCGAATTTACTTCGGGGCTGACGGTACCTTGCGAATAAGCACCGGCTAACTCCGTGCCAGCAGCCGCGGTAATACGGAGGGTGCAAGCGTTATCCGGAATCACTGGGTTTAAAGGGTGCGTAGGCGGCGTTATAAGTCAGAGGTGAAAGCCCACCGCTTAACGGTGGAACTGCCTTTGATACTGTAATGCTTGAATCAGGCTGAGGTCAGCGGAATGTGTCATGTAGCGGTGAAATGCATAGATATGACATAGAACACCAATTGCGAAGGCAGCTGACTAGACCTGTATTGACGCTGAG…
aeed2f4baf68f874279fc2e3149d6853	D_0__Bacteria;D_1__Firmicutes;D_2__Clostridia;D_3__Clostridiales;D_4__Ruminococcaceae;D_5__uncultured	TGGGGAATATTGGGCAATGGGCGAAAGCCTGACCCAGCAACGCCGCGTGAAGGAAGAAGGCTTTCGGGTTGTAAACTTCTTTGATCAGGGACGAAAAAAATGACGGTACCTGAAGAACAAGCCACGGCTAACTACGTGCCAGCAGCCGCGGTAATACGTAGGTGGCAAGCGTTATCCGGATTTACTGGGTGTAAAGGGCGTGTAGGCGGTCTGGCAAGTCGGATGTTTAATCCCCGGGCTTAACCCGGGGCTGTCATCCGAAACTGCTGGACTTGAGTACTGGAGAGGATAGTGGAATTCCTAGTGTAGCGGTAAAATGCGTAGATACTGGGAGGAACACCGGTGGCGAAGGCGGCTCCCTGGACCGGTACTGACACTGAGGTGCGAAAGCGTGGGTAG…
744d5178d095d470e49cc183c7a707e0	D_0__Bacteria;D_1__Actinobacteria;D_2__Acidimicrobiia;D_3__Microtrichales;D_4__Microtrichaceae;D_5__uncultured;D_6__uncultured Acidimicrobiales bacterium	TGGGGAATCTTGCACAATGGGCGAAAGCCTGATGCAGCGACGCCGCGTGGGGGGTGAAGGCCTTAGGGTCGTAAACCCCTTTCAGTAGGGAAGAAAATGACGGTACCTACAGAAGAAGCTCCGGCCAACTACGTGCCAGCAGCCGCGGTAAGACGTAGGGGGCGAGCGTTGTCCGGATTTATTGGGCGTAAAGGGCTCGTAGGCGGTTACGTAAGTCGGATGTGAAAACTCGAGGCTCAACTTCGAGACGCCATCCGATACTGCGTTGACTTGAGTCCGGTAGAGGAGTGTGGAATTCTTAGTGTAGCGGTGAAATGCGCAGATATTAGGAGGAACACCTATTGCGAAGGCAGCACTCTGGGCCGGTACTGACGCTGAGGAGCGAAAGCATGGGTAGCA…
5001d28b156d4564fc558e6ecd2f1462	D_0__Bacteria;D_1__Bacteroidetes;D_2__Bacteroidia;D_3__Chitinophagales;D_4__Saprospiraceae;D_5__uncultured;D_6__metagenome	TAAGGAATATTGGACAATGGGCGCAAGCCTGATCCAGCCATGCCGCGTGAAGGATGAAGGCGCTCAGCGTTGTAAACTTCTTTCGGACGGGAACAATACCTCTGACTTGTCAGAGCTTGAGGGTACCGTCAGGATAAGCACCGGCTAACTCCGTGCCAGCAGCCGCGGTAATACGGAGGGTGCAAGCGTTATCCGGAATCACTGGGTTTAAAGGGTGCGTAGGCGGTCTTGTTAGTCAGTCGTGAAATCGCTGGGCTCAACCCATGCAATTGCGATTGATACTGCAGGACTTGAATTAGGTTAAGGCAGGCGGAATGTGACATGTAGCGGTGAAATGCATAGATATGTCATAGAACACCGATTGCGAAGGCAGCCTGCTGGGCCTTTATTGACGCTGAG…
6d2036a2a5f8b478c8813cbd26ac1f28	D_0__Bacteria;D_1__Bacteroidetes;D_2__Bacteroidia;D_3__Bacteroidales;D_4__Marinilabiliaceae;D_5__Carboxylicivirga;D_6__uncultured bacterium	TGAGGAATATTGGTCAATGGACGCAAGTCTGAACCAGCCATGTCGCGTGTAGGAAGACTGCCCTACGGGTTGTAAACTACTTTTATATGGGAAGAAAATGATCTACGTGTAGATAACTGCCGGTACCATATGAATAAGCATCGGCTAACTCCGTGCCAGCAGCCGCGGTAATACGGAGGATGCGAGCGTTATCCGGATTCATTGGGTTTAAAGGGTGCGTAGGCGGAATAATCAGTCAGGGGTGAAAGTTTGTGGCTCAACCATAAAATTGCCTTTGATACTGTTATTCTTGAGTATATTTGAGGTAGGCGGAATGTGATGTGTAGCGGTGAAATGCATAGATATATCACAGAACACCGATTGCGAAGGCAGCTTACTAAACTATAACTGACGCTGATG…
24f9bd0a2f5cf32961213abf27825931	D_0__Bacteria;D_1__Planctomycetes;D_2__Phycisphaerae;D_3__Phycisphaerales;D_4__Phycisphaeraceae;D_5__SM1A02;D_6__uncultured bacterium	CGACGAATATTCCGCAATGCGCGAAAGCGTGACGGAGCAATGCCGCGTGCAGGATGAAGCGGCTTCGCCGTGTAAACTGCTGTCAGGGTTTAGGAAGAAAGTGACCAGACCCAAAGGAAGGGCCGGCTAACTTCGTGCCAGCAGCCGCGGTAAGACGGAGGGCCCGAGCATTAATCAGAGTTACTGGGCTTAAAGGGTGCGTAGGCGGGCCTGTAAGTGTTTTGTGAAATCCCACGACTCAATCGTGGAACTGCTGAGCATACTGCAGGTCTTGAGATTGGTAGGGGCTGTCGGAACGATAGGTGGAGCGGTGAAATGCGTAGATATCTATCGGAACGCCAAAAGTGAAGACAGGCAGCTGGGCCAATTCTGACGCTGAGGCACGAAAGCGTGGGGAGC…
7452252b6489335a726f433703f859e6	D_0__Bacteria;D_1__Acidobacteria;D_2__Acidobacteriia;D_3__Solibacterales;D_4__Solibacteraceae (Subgroup 3);D_5__PAUC26f;D_6__uncultured Acidobacteria bacterium	TGAGGAATCTTGCACAATGGGGGAAACCCTGATGCAGCGACGCCGCGTGAGTGATGACGCCCTTCGGGGTGTAAAGCTCTTTCAGTGGGAACGATAATGACGGTACCCACAGAAGAAGGTGCGGCTAACTACGTGCCAGCAGCCGCGGTAATACGTAGGCACCGAGCGTTGTTCGGAGTTACTGGGCGTAAAGAGTGCGTAGGCGGTTCCGTAAGTTCGGTGTGAAATCTCCCGGCTCAACAGGGAGGCTGCATCGAATACTGCAGAGCTTGAGCATGGGAGAGGAAAGCGGAATTCCTGGTGTAGCGGTGAAATGCGTAGATATCAGGAGGAACACCGGCGGTGTAGACGGCTTTCTGGACCATTGCTGACGCTGAGGCACGAAAGCGTGGGGAGCAA…
1220adc1f81a5d8130d58e111785919b	D_0__Bacteria;D_1__Firmicutes;D_2__Clostridia;D_3__Clostridiales;D_4__Family XIII;D_5__Family XIII AD3011 group;D_6__uncultured rumen bacterium	TGGAGAATCTTGCACAATGGGCGAAAGCCTGATGCAGCAACGCCGCGTGAAGGATGAAGGCCCTTGGGTCGTAAACTTCTGTTCTAAGGGAAGATAGTGACGGTACCTTAGGAGCAAGTCCCGGCTAACTACGTGCCAGCAGCCGCGGTAATACGTAGGGGGCGAGCGTTATCCGGAATTATTGGGCGTAAAGAGTACGTAGGTGGTTTCCTAAGCGAGGGGTTTAAGGCAATGGCTTAACCATTGTTCGCCCCCCGAACTGGGTTACTTGAGTGCTGGAGGGGAAAGCGGAATTCCTAGTGTAGCGGTGAAATGCGTAGATATTAGGAGGAACACCAGTGGCGAAGGCGGCTTTCTGGACAGTAACTGACACTGAGGTACGAAAGTGTGGGGAGCAAA…
ec4b8e4967a7c2ebe5049651d551fbd0	D_0__Bacteria;D_1__Proteobacteria;D_2__Deltaproteobacteria;D_3__Desulfobacterales;D_4__Desulfobulbaceae;D_5__uncultured	TGAGGAATATTGGACAATGGGCGAGAGCCTGATCCAGCCATGCCGCGTGCAGGAAGACTGCCCTATGGGTTGTAAACTGCTTTTATACAGGAAGAAACACTCCCTCGTGAGGGAGCTTGACGGTACCATCAAAGGAAGCACCGGCTAACTCCGTGCCAGCAGCCGCGGTAATATGGAGGGTGCAAGCGTTGTTCGGAATTACTGGGCGTAAAGCGCGCGTAGGCGGCTATGTAAGTCAGATGTGAAAGCCCGCGGCTCAACCGTGGAAGTGCATTTGAAACTGTATAGCTTGAGTACTGGAGGGGGTAGTGGAATTCCCGGTGTAGAGGTGAAATTCGTAGATATCGGGAGGAATACCGGTGGCGAAGGCGACTACCTGGCCAGATACTGACGCTGAGG…
e623a0b5a7dc2a0aabdd43ef00901809	D_0__Bacteria;D_1__Chloroflexi;D_2__Anaerolineae;D_3__Ardenticatenales;D_4__uncultured;D_5__uncultured organism;D_6__uncultured organism	TGAGGAATATTGCACAATGGGGGCAACCCTGATGCAGCAACGCCGCGTGAACGATGAAGGCTTTCGGGTTGTAAAGTTCTTTTCTGAAGGAAGATAGTGACGGTACTTCAGGAATAAGTCCCGGCTAACTACGTGCCAGCAGCCGCGGTAAAACGTAGGGGGCTAGCGTTATCCGGATTTATTGGGCGTAAAGCGCACGTAGGCGGCGCTGTAAGTTGGGCGTGAAAGCTCTTGGCTTAACTGAGAGAGGTCGTTCAAAACTGCAGCGCTTGAGGTTGGAAGAGGAGAGTGGGATTCCCGGTGTAGTGGTGGAATGCGTAGATATCGGGAGGAACACCAGTGGCGAAAGCGGCTCTCTGGTCCATACCTGACGCTGAGGTGCGAAAGCGTGGGGAGCGA…
63a2fb1927eb89f9851f7f34c22b4cb4	D_0__Bacteria;D_1__Spirochaetes;D_2__Leptospirae;D_3__Leptospirales;D_4__Leptospiraceae;D_5__RBG-16-49-21;D_6__uncultured bacterium	TTAAGAATCTTGCGCAATGGGCGAAAGCCTGACGCAGCGACGCCGCGTGGATGATGAAGGCCTTCGGGTTGTAAAGTCCGGTAAGCAGGGAAGAATAAGTAAGAGGTAATATTTCTTACGATGACGGTACCTGCCTAAAGCCCCGGCTAACTACGTGCCAGCAGCCGCGGTAATACGTATGGGGCAAGCGTTGTTCGGAATTATTGGGCGTAAAGGGCATCTAGGCGGGGAATTAAGTTAGGTGTGAAATCCATGGGCTCAACCCGTGAATTGCATCTAAAACTGGTTCTCTTGAGTTAGGGAGAGGAAAGCAGAATTCCTGGTGTAGCGGTGAAATGCGTAGATATCAGGAGGAATACCAGTGGCGAAGGCGGCTTTCTGGCCTATAACTGACGCTGA…
a5f428f62d9a6b284e0f810616d526cd	D_0__Bacteria;D_1__Bacteroidetes;D_2__Bacteroidia;D_3__Sphingobacteriales;D_4__Lentimicrobiaceae;D_5__uncultured Bacteroidetes bacterium;D_6__uncultured Bacteroidetes bacterium	TAAGGAATATTGGGCAATGGACGAAAGTCTGACCCAGCCATGCCGCGTGCAGGATGACAGCCCTACGGGTTGTAAACTGCTTTTTTGTGAGAAGAACTCCCCGGACGTGTCCGGGGCTGACGGTACCGCAAGAATAAGCATCGGCTAACTCCGTGCCAGCAGCCGCGGTAATACGGAGGATGCAAGCGTTATCCGGATTTATTGGGTTTAAAGGGTGCGTAGGCGGAATGATAAGTCAGTGGTGAAATCCCCCGGCTCAACCGGGGAACTGCCATTGATACTGCCATTCTTGAGTACAGATGAAGTGGGCGGAATGAGTCATGTAGCGGTGAAATGCATAGATATGACTCAGAACACCGATAGCGAAGGCAGCTCACTAAACTGTAACTGACGCTCAGG…
c3230137db6c400074e277d9914ce339	D_0__Bacteria;D_1__Proteobacteria;D_2__Gammaproteobacteria;D_3__KI89A clade	TGAGGAATATTGGACAATGGAGGGGACTCTGATCCAGCCATGCCGCGTGCAGGAAGACGGCCCTATGGGTTGTAAACTGCTTTTATACGGGAAGAAAAAAGGGCACGTGTGCCCTACTGACGGTACCGTAAGGATAAGGACCGGCTAACTCCGTGCCAGCAGCCGCGGTAATACGGAGGGTCCGAGCGTTAATCGGAATTACTGGGCGTAAAGCGAGCGTAGGCGGTTCGTTAAGTGGGATGTGAAAGCCCCGGGCTCAACCTGGGAACTGCATTCCAAACTGACGAACTAGAGTATGGTAGAGGGAGGTAGAATTTCCTGTGTAGCGGTGAAATGCGTAGATATAGGAAGGAATACCGGTGGCGAAGGCGGCCTCCTGGACCAATACTGACGCTGAGG…
a93dbca9544210e5cdbc1684660fb7d4	D_0__Bacteria;D_1__Proteobacteria;D_2__Deltaproteobacteria;D_3__Myxococcales;D_4__Sandaracinaceae;D_5__uncultured;D_6__uncultured Sorangiineae bacterium	TAGGGAATATTGCGCAATGGGCGAAAGCCTGACGCAGCGACGCCGCGTGGATGATGACGCCCTTCGGGGTGTAAAATCCTTTCAGTGGGGACGAACCGGTTCTTCGGAGCCCTGACGGTACCCACAGAAGAAGCACCGGCTAACTCCGTGCCAGCAGCCGCGGTAATACGGAGGGTGCGAGCGTTGTTCGGATTTACTGGGCGTAAAGCGCGTGTAGGCGGACTCGCAAGTCGGTTGTGAAATCCCTGGGCTTAACCTAGGAACTGCATCCGAAACTGCTTGTCTTGAGTAATGGAGAGGGTGGCGGAATTCCCGGTGTAGAGGTGAAATTCGTAGATATCGGGAGGAACATCAGTGGCGAAGGCGGCCACCTGGACATTTACTGACGCTGAGACGCGA…
7db9da43f4aec718b22b69c5ff2a0083	D_0__Bacteria;D_1__Proteobacteria;D_2__Alphaproteobacteria;D_3__Rhodobacterales;D_4__Rhodobacteraceae;D_5__uncultured	TGGGGAATCTTAGACAATGGGCGCAAGCCTGATCTAGCCATACCGCGTGAGTGATGAAGGCCTTAGGGTCGTAAAGCTCTTTCGCCAGGGAAGATAATGACTGTACCTGGTAAAGAAGTCCCGGCTAACTCCGTGCCAGCAGCCGCGGTAATACGGAGGGGACTAGCGTTGTTCGGAATTACTGGGCGTAAAGCGCACGTAGGCGGACCAGAAAGTATGGGGTGAAATCCCGGGGCTCAACCCCGGAACTGCCTCATAAACTCCTGGTCTAGAGTTCGAGAGAGGTGAGTGGAATTCCGAGTGTAGAGGTGAAATTCGTAGATATTCGGAGGAACACCAGTGGCGAAGGCGGCTCACTGGCTCGATACTGACGCTGAGGTGCGAAAGCGTGGGGAGCAA…
cc2aaa53c9811b05c00aad34011a1c3d	D_0__Bacteria;D_1__Bacteroidetes;D_2__Bacteroidia;D_3__Bacteroidetes VC2.1 Bac22;D_4__uncultured Bacteroidetes bacterium;D_5__uncultured Bacteroidetes bacterium;D_6__uncultured Bacteroidetes bacterium	TAAGGAATATTGGTCAATGGACGCAAGTCTGAACCAGCCATGCCGCGTGCAGGAAGACGGCCTTATGGGTTGTAAACTGCTTTTATACAGGAATAATAGTGAGTACGTGTACTGACTTGAAGGTACTGTAAGAATAAGCACCGGCTAACTCCGTGCCAGCAGCCGCGGTAATACGGAGGGTGCAAGCGTTATCCGGATTTATTGGGTTTAAAGGGTGCGCAGGCGGATATGTCAGTCAGTGGTGAAATCCCGAGGCTCAACTTCGGAACTGCCATTGATACTGCATATCTTGAATACGGTTGAAGTAGGCGGAATGTAGCATGTAGCGGTGAAATGCATAGATATGCTACAGAACACCGATCGCGAAGGCAGCTTACTAAGCCGATATTGACGCTCAGG…
57390be49ef41d4766a8fc13c7e91582	D_0__Bacteria;D_1__Planctomycetes;D_2__Planctomycetacia;D_3__Pirellulales;D_4__Pirellulaceae	TCGAGAATCTTCCGCAATGGGCGCAAGCCTGACGGAGCGACGCCGCGTGCGGGATGAAGGCCTTCGGGTTGTAAACCGCTGTCAGTTGGGAGGAAATGCATAGGGGTTCTCTCCTGTGTTTGACCGATCTTCAGAGGAAGGACGGGCTAAGTTCGTGCCAGCAGCCGCGGTAACACGAACCGTCCAAACGTTATTCGGAATAACTGGGCTTAAAGGGTTCGTAGGCGGCTATGAAGGTGGGGTGTGAAATCCCTCGGCTCAACCGAGGAACTGCGCTCCAAACCACATAGCTTGAGGGAGACAGAGGTAAGCGGAACTGATGGTGGAGCGGTGAAATGCGTTGATATCATCAGGAACACCAGTGGCGAAGGCGGCTTACTGGGTCTCTTCTGACGCTGA…
1ea3cc9fcef1722f2763deeafc080e4c	D_0__Bacteria;D_1__Patescibacteria;D_2__Parcubacteria;D_3__Candidatus Kaiserbacteria;D_4__bacterium SH4-10;D_5__bacterium SH4-10;D_6__bacterium SH4-10	TCGAGAATCTTCCGCAATGGACGAAAGTCTGACGGAGCGACGCCGCGTGGTGGATGAAGCCCTTAGGGGCGTAAACACCTTTTATGAGTGAAGAAGTTTATTGACATTAACTCATGAATAAGGGGCTCCCAATTCTGTGCCAGCAGGAGCGGTAATACAGAAGCCTCAAGCGTTACCCGGATTTACTGGGCGTAAAGGATGCGTAGGCGGTTATATTAGTCGGATGTTAAATCCTGGGGCTCAACCTCAGGCTCGCATTCGAAACGGTATAACTAGAAGGTGTGAGAGGTAAGTAGAACTCTTGGTGTAGGGGTGGAATCCGTTGATATCAAGGGGAATACCAAATGCGAAGGCAACTTACTGGCACATTCTTGACGCTGAGGCATGAAAGCGTGAGTA…
e36ec1b05d074d76cbe6eb92e0b7e8c5	D_0__Bacteria;D_1__Proteobacteria;D_2__Deltaproteobacteria;D_3__Bdellovibrionales;D_4__Bdellovibrionaceae;D_5__OM27 clade;D_6__uncultured bacterium	TGGGGAATATTGCGCAATGGGCGAGAGCCTGACGCAGCCACGCCGCGTGAGTGATGAAGGCCTTCGGGTTGTAAAGCTCTGTCGGGGGGGAAGAAGATCTGACGGTACCCCCCAAGAAAGCACCGGCTAACTCCGTGCCAGCAGCCGCGGTAATACGGAGGGTGCAAGCGTTGCTCGGAATCACTGGGCGTAAAGCGGACGCAGGCGGCTCGGAAAGTCGGATGTGAAAGCCCAGGGCTCAACCCTGGAGCTGCATTCGAAACTGTCGACCTTGAATACGGGAGAGGGAAGCGGAATTCCTGGTGTAGAGGTGAAATTCGTAGAAATCAGGAGGAACACCGGTGGCGAAAGCGGCTTCCTGGCCCGATATTGACGCTCATGTCCGAAAGCGTGGGTAGC…
05b3493a7dfe1af87495f659b2471962	D_0__Bacteria;D_1__Proteobacteria;D_2__Alphaproteobacteria;D_3__uncultured	TGGGGAATATTGGACAATGGGCGAAAGCCTGATCCAGCAATGCCGCGTGAGTGAAGAAGGCCTTAGGGTTGTAAAGCTCTTTCACCGGGGAAGATAATGACGGTACCCGGAAAAGAAGCCCCGGCTAACTCCGTGCCAGCAGCCGCGGTAAGACGGAGGGGGCTAGCGTTGTTCGGAATTACTGGGCGTAAAGGGCGCGTAGGCGGCATGCCAAGTTGGAGGTGAAAGCCCGGGGCTCAACCCCGGAACTGCCTTCAAAACTGGCAAGCTAGAGTTCGGAAGAGGAGAGTGGAATTCCCAGTGTAGAGGTGAAATTCGTAGATATTGGGAGGAACACCAGTTGCGAAGGCGGCTCTCTGGTCCGATACTGACGCTGAGGCGCGAAAGCGTGGGGAGCAA…
9d4d4f07d14da53938fe117870552fc0	D_0__Bacteria;D_1__Proteobacteria;D_2__Alphaproteobacteria;D_3__Rhodobacterales;D_4__Rhodobacteraceae;D_5__uncultured	TGGGGAATCTTGGACAATGGGGGCAACCCTGATCCAGCCATGCCGCGTGAGTGAAGAAGGCCCTAGGGTCGTAAAGCTCTTTCGCCAGGGAAGATAATGACGGTACCTGGTAAAGAAACCCCGGCTAACTCCGTGCCAGCAGCCGCGGTAATACGGAGGGGGTTAGCGTTGTTCGGAATTACTGGGCGTAAAGCGCACGTAGGCGGATTAGTCAGTTAGAGGTGAAATCCCAGGGCTCAACCCTGGAACTGCCTTTAATACTGCTAGTCTTGAGTTCGAGAGAGGTGAGTGGAATTCCGAGTGTAGAGGTGAAATTCGTAGATATTCGGAGGAACACCAGTGGCGAAGGCGGCTCACTGGCTCGATACTGACGCTGAGGTGCGAAAGCGTGGGGAGCAA…
a88d23b24a8f98d2045e1af60b613f3f	D_0__Bacteria;D_1__Proteobacteria;D_2__Deltaproteobacteria;D_3__Myxococcales;D_4__bacteriap25;D_5__uncultured organism;D_6__uncultured organism	TGGGGAATATTGGACAATGGGCGAAAGCCTGATCCAGCGACGCCGCGTGGGTGATGAAGGCCCTCGGGTTGTAAAGCCCTGTCGGCGGGAATGAATAAGGATAGCCTAATACGTTATCTGATGACGGTACCCGCAAAGGAAGCACCGGCTAACTCTGTGCCAGCAGCCGCGGTAAGACAGAGGGTGCAAGCGTTGTTCGGAATCACTGGGCGTAAAGGGCGTGTAGGCGGTGAAGTGTGTCTGATGTGAAAGCCCTCGGCTCAACCGGGGAATGGCATTGGAAACTACTTCACTCGAGTACGAGAGAGGGTGGCGGAATTCCTAGTGTAGAGGTGAAATTCGTTGATACTAGGAGGAACACCTGAGGCGAAGGCGGCCACCTGGCTCGTAACTGACGCT…
43343c7c0d665acd66682e28689eced4	D_0__Bacteria;D_1__Planctomycetes;D_2__OM190;D_3__uncultured bacterium;D_4__uncultured bacterium;D_5__uncultured bacterium;D_6__uncultured bacterium	TCGAGAATCTTCCGCAATGGGCGAAAGCCTGACGGAGCGACGCCGCGTGGACGATGAAGGCCTTCGGGTTGTAAAGTCCTTTCGCGCAATAGGAAACCCGTAGTGTTAATAGCACTGCGATTGACGTTATTGTGTAAAGAAGCTCCGGCTAACTTCGTGCCAGCAGCCGCGGTAATACGAAGGGAGCGAGCGTTGTTCGGAATCACTGGGCATAAAGGGCACGTAGGCGGCTTGGTAAGTTGGATGTGAAAGCCCCTGGCTCAACCAGGGAACTGCATTCAAAACTGCCGAGCTTGAGACCGGTAGGGGAGTGTGGAACTTCTAGTGTAGCGGTGAAATGCGTAGATATTAGAAGGAACGCCGGTGGCGAAAGCGACACTCTGGACCGGTTCTGACGCT…
718ac69e7e4c5667d6bf5879feab5f91	D_0__Bacteria;D_1__Chloroflexi;D_2__Anaerolineae;D_3__RBG-13-54-9;D_4__uncultured bacterium;D_5__uncultured bacterium;D_6__uncultured bacterium	TAAGGAATATTGCACAATGGGGGAAACCCTGATGCAGCAACGCCGCGTGAGCGATGAAGGCCTTCGGGTTGTAAAGCTCTTTTCTAAGGGAAGAGGAAGGACGGTACCTTAGGAACAAGTCTCGGCTAACTACGTGCCAGCAGCCGCGGTAAAACGTAGGAGGCAAGCGTTATCCGGATTCATTGGGCGTGAAGGGCAAGTAGGCGGTCGTCAAAGTTGGGCATGACATCTCTCGGCTTAACTGGGAGAATGTGCACAAAACTAGGCGACTAGAGGACAGGAGAGGGAAGCGGAATTCCTGGTGTAGCGGTGGAATGCTCAGATACTAGGAGGAACACCAGTGGCGAAGGCGGCTTCCTGGCCTGCACCTGACGCTGAGAGGCGAAAGCTAGGGGAGCG…
284ba5245a31c145b02d7342fbca097d	D_0__Bacteria;D_1__Chloroflexi;D_2__Anaerolineae;D_3__SBR1031;D_4__anaerobic digester metagenome;D_5__anaerobic digester metagenome;D_6__anaerobic digester metagenome	TAAGGAATATTGCACAATGGGCGCAAGCCTGATGCGGCAACGCCGCGTGCCCGATGAAGGCCTTCGGGTTGTAAAGGGCTTTTCTGGCTGAAGAGGAAGGACAGTAGGCCAGGAATAAGCGTCGGCTAACTACGTGCCAGCAGCCGCGGTAAAACGTAGGACGCGAGCGTTATCCGGATTTACTGGGCGTAAAGCGCGGGCAGGCGGCTGTCAAAGTCGGACGTGAAAGCTCCCGGCTCAACTGGGAGAGGTCGTTCGAGACTAGGCAGCTAGAGGGCAGCAGAGGTGTGCGGAATTCCGGGTGGAGTGGTGAAATGCGTAGAGATCCGGAGGAACACCAGAGGCGAAGGCGGCACACTGGGCTGCGCCTGACGCTGAGCCGCGAAAGCGTGGGTAGCG…
a3ecb4fa158a9be724debf4d68309962	D_0__Bacteria;D_1__Bacteroidetes;D_2__Bacteroidia;D_3__Chitinophagales;D_4__uncultured;D_5__uncultured Bacteroidetes bacterium;D_6__uncultured Bacteroidetes bacterium	TAGGGAATATTGGTCAATGGGGGCAACCCTGAACCAGCCATGCCGCGTGGGGGAAGAAGGTCCTCTGGATTGTAAACCTCTTTTATCAGGGAATAAACTTTTGCTATACGCAGAACTGAAGGTACCTGAAGAATAAGCACCGGCTAACTCCGTGCCAGCAGCCGCGGTAATACGGAGGGTGCAAGCGTTGTCCGGATTTATTGGGTTTAAAGGGTACGTAGGCGGATGTATAAGTCAGTGGTGAAATCTTGCGGCTCAACCGTAAAATTGCCATTGAAACTGTATATCTTGAGTACAACTGAGGTGGTTGGAATGCGTAGTGTAGCGGTGAAATGCATAGAGATTACGCAGAACACCAATTGCGAAGGCAGATCACTAAGTTGTAACTGACGCTGATGT…
ea0c3ac66a44cee0731ea02cd455b15a	D_0__Bacteria;D_1__Planctomycetes;D_2__SGST604;D_3__uncultured organism;D_4__uncultured organism;D_5__uncultured organism;D_6__uncultured organism	TGGGGAATTTTAGGCAATGAGCGAAAGCTTGACCTAGCGACGCCGCGTGTACGAAGAAGGCCTTCGGGTTGTAAAGTACTGTTGCAGACGTTGGAATCCTGACCTGTCTGTGAGGAAGCTCTGGCTAAACACGTGCCAGCAGCCGCGGTAATACGTGTAGAGCTAGCGTTGCTCGGTATCACTGGGCTTAAAGGGTGTGTAGGCGGCCAAGTAAGTAATGTGTGAAATCCTACGGCTTACCCGTAGAACTGCGCATTATACTGCTTGGCTAGAGTATCGAAGAGGATAGCGGAATTCTGGGTGTAGCGGTGAAATGCATAGATATCCAGGAGAACGTCGGTGGCGAAGGCGGCTATCTGGTCGAAAACTGACGCTGAGACACGAAAGCCAGGGGAGCGA…
e28b208f9074f33cf6b83eba45206069	D_0__Bacteria;D_1__Chloroflexi;D_2__Anaerolineae;D_3__SBR1031;D_4__A4b;D_5__uncultured organism;D_6__uncultured organism	TGAGGAATATTGCACAATGGGCGCAAGCCTGATGCAGCGACGCCGCGTGGGTGATGAAGGTTTTCGGATCGTAAAGCCCTTTTCTTGGTGACGAGAGAGGACGGTAGCCAAGGAAAAAGTGTCGGCTAACTACGTGCCAGCAGCCGCGGTAAAACGTAGGACGCAAGCGTTATCCGGAATTACTGGGCGTAAAGCGCGCGCAGGCGGGTTGGCAAGTCATGCGTGAAAGCTCCCGGCTAAACTGGGAGAGGTCGGATGAGACTGCCGGTCTGGAGTAGGTCAGAGGCGTGTGGAATTCCACGTGTAGTGGTGAAATGCGTAGAGATGTGGAGGAACACCAGTGGCGAAGGCGGCACGCTGGGGCCTGACTGACGCTGAGGCGCGAAAGCATGGGTAGCG…
7a11111b4e1295118107c6eafeec36d0	D_0__Bacteria;D_1__Chloroflexi;D_2__KD4-96	TCGGGAATTTTGCTCAATGGGGGAAACCCTGAAGCAGCAACGCCGCGTGAGGGATGACGGCCTTCGGGTTGTAAACCTCTTTTGCCGGGGACGATAATGACGGTACCCGGAGAATAAGCCACGGCTAACTACGTGCCAGCAGCCGCGGTAATACGTAGGTGGCAAGCGTTGTCCGGATTTACTGGGCGTAAAGAGCGCGCAGGCGGCCAGGTCAGTCGAATGTGAAAGCCCCCGGCTCAACTGGGGAAGGTCGTTCGATACTGCTTGGCTCGAAGATAGGAGAGGGAAGTGGAATTTCAGGTGTAGTGGTGAAGTTCGTTGATATTGGGAGGAACACCGGTGGCGAAAGCGGCTCTCTGGCCCAGTACTGACGCTCAGACACGAAAGCGTGGGGAGCAA…
f732dab6010f9f45ef930b0dab508402	D_0__Bacteria;D_1__Planctomycetes;D_2__Planctomycetacia;D_3__Planctomycetales;D_4__Gimesiaceae;D_5__uncultured;D_6__uncultured bacterium	TCGAGAATCTTCGGCAATGGACGCAAGTCTGACCGAGCGACGTCGCGTGCGGGATGAAGGCCTTCGGGTTGTAAACCGCTGTCAGAGGGGAGGAAATCATGGTTGGCTATCCTTCCATGTTGACCGAGCCTCAGAGGAAGCACGGGCTAAGTTCGTGCCAGCAGCCGCGGTAATACGAACTGTGCGAACGTTATTCGGAATCACTGGGCTTAAAGGGTGCGTAGGCGGCCAGACAAGTAGGATGTGAAATCTTCCGGCTTAACCGGAAAACTGCGTTCTAAACTGTTTGGCTTGAGTAAGATAGGGGTGTGCGGAACTTCCGGTGGAGCGGTGAAATGTGTTGAGATCGGAAGGAACGCCGGTGGCGAAAGCGGCACACTGGGTCTTTACTGACGCTGA…
ab0bac6fb9908fe919e4b564225ce9cd	D_0__Bacteria;D_1__Bacteroidetes;D_2__Bacteroidia;D_3__Bacteroidales	TGAGGAATATTGCGCAATGGACGAAAGTCTGACGCAGCCATGCCGCGTGCAGGATGACGGCCCTATGGGTTGTAAACTGCTTTTATACAGGAAGAAGCTCGTCTACGTGTAGACGATTGACTGTACTGTAAGAATAAGCATCGGCTAACTCCGTGCCAGCAGCCGCGGTAATACGGAGGATGCAAGCGTTATCCGGATTTATTGGGTTTAAAGGGTGCGCAGGCGGGAAAATAAGTCAGTGGTGAAATCCTGCAGCTTAACTGTAGAACTGCCATTGATACTGTTTTTCTTGAGTTTGGTTGAGGTAGGCGGAATGTGTAATGTAGCGGTGAAATGCTTAGATATTACACAGAACACCGATTGCGTAGGCAGCTTACTAAGCCATAACTGACGCTCATG…
1b4c0da7baeb0c8389953e69e18fca27	D_0__Bacteria;D_1__Proteobacteria;D_2__Gammaproteobacteria;D_3__OM182 clade;D_4__uncultured bacterium;D_5__uncultured bacterium;D_6__uncultured bacterium	TAGGGAATATTGTGCAATGGGGGAAACCCTGACACAGCCATGCCGCGTGTGTGAAGAAGGCCTTAGGGTTGTAAAGCACTTTCAGCAAGGAGGAAAAAGCCGGATTAATACTCCGGTCTTATGACGTTACTTGCAGGAGGAGATCCGGCTAACTCCGTGCCAGCAGCCGCGGTAATACGGAGGGATCGAACGTTAATCGGAATTACTGGGCGTAAAGCGCACGCAGGTGGTTTGTTAAGTGGGATGTGAAAGCCCCGGGCTTAACCTGGGAACTGCATTCCAAACTGATGAACTAGAGTACGATAGAGGGGGGTAGAATTCAGAGTGTAGCGGTGAAATGCGTAGATATTCTGAGGAATACCGGTGGCGAAGGCGGCCCCCTGGATTGATACTGACACT…
617ae4201ac8790f8e2f287ed86fc892	D_0__Bacteria;D_1__Epsilonbacteraeota;D_2__Campylobacteria;D_3__Campylobacterales;D_4__Sulfurovaceae;D_5__Sulfurovum	TGGGGAATATTGCACAATGGAGGAAACTCTGATGCAGCAACGCCGCGTGGAGGATGACGCATTTCGGTGTGTAAACTCCTTTTATATGGGAAGATAATGACGGTACCATATGAATAAGCACCGGCTAACTCCGTGCCAGCAGCCGCGGTAATACGGAGGGTGCAAGCGTTACTCGGAATCACTGGGCGTAAAGCGCGCGCAGGCGGCTATTTAAGTTGGATGTGAAAGCCTACGGCTCAACCGTAGAACTGCATCCAAAACTATTTAGCTAGAGTGTGGGAGAGGAAGATGGAATTAGTTGTGTAGGGGTAAAATCCGTAGAGATAACTAGGAATACCAAAAGCGAAGGCAATCTTCTGGAACACTACTGACGCTGAGGCGCGAAAGCGTGGGGAGCAA…
0de41a16b81ced182196fa98b1ccc966	D_0__Bacteria;D_1__Bacteroidetes;D_2__Bacteroidia;D_3__Bacteroidales;D_4__Bacteroidetes BD2-2	TGAGGAATATTGGTCAATGGGCGCAAGCCTGAACCAGCCATGCCGCGTGAAGGATGACAGCGCTATGCGTTGTAAACTTCTTTTGTACAGGAAGAAACCCTGCTACGTGTAGCAGTTTGACGGTACTGTACGAATAAGCATCGGCTAACTCCGTGCCAGCAGCCGCGGTAATACGGAGGATGCAAGCGTTATCCGGATTTATTGGGTTTAAAGGGTACGTAGGCGGAAAATTAAGTCAGTAGTGAAATCCTGCAGCTTAACTGTAGAACTGTTATTGATACTGGTTTTCTTGAATATAGTTGAGGTAGGCGGAATGTGTAATGTAGCGGTGAAATGCTTAGATATTACACAGAACACCGATTGCGAAGGCAGCTTACTAAGCTATGATTGACGCTGAGG…
bb1cf7c858d26f92898444283e3407e1	D_0__Bacteria;D_1__Bacteroidetes;D_2__Bacteroidia;D_3__Bacteroidales;D_4__Marinilabiliaceae;D_5__uncultured;D_6__uncultured Bacteroidetes bacterium	TGAGGAATATTGGTCAATGGACGGAAGTCTGAACCAGCCATCCCGCGTGCAGGACGACGGCCCTATGGGTTGTAAACTGCTTTTCTGAAGGAAGAATAATAGCGATGTATCGTTAGACGACGGTACTTCAGGAATAAGCATCGGCTAACTCCGTGCCAGCAGCCGCGGTAATACGGAGGATGCAAGCGTTATCCGGATTTATTGGGTTTAAAGGGTGCGTAGGCGGAGTAATAAGTCAGTGGTGAAATCTTTCGGCTCAACCGAGAAACTGCCATTGAAACTGTTATTCTTGAGTTCGGCAGAGGTAGGCGGAATGTGTAATGTAGCGGTGAAATGCTTAGATATTACACAGAACACCAATTGCGTAGGCAGCTTACTATACCGACACTGACGCTGAGG…
e4e2c989a0c09f013b3f2d5c0f6768a6	D_0__Bacteria;D_1__Proteobacteria;D_2__Gammaproteobacteria;D_3__Gammaproteobacteria Incertae Sedis;D_4__Unknown Family;D_5__uncultured;D_6__uncultured sediment bacterium	TGGGGAATATTGCACAATGGGCGCAAGCCTGATGCAGCAATGCCGCGTGTGTGAAGAAGGCCTGCGGGTTGTAAAGCACTTTTATTAGGAAAGAAAAACCCGGAGATAATACCTCCGGCATTGACGGTACCTAAAGAATAAGCACCGGCTAACTCAGTGCCAGCAGCCGCGGTAATACTGAGGGTGCAAGCGTTAATCGGAATTACTGGGCGTAAAGCGAGTGTAGGCGGCTATATAAGTCGGATGTGAAAGCCCTGGGCTTAACCTGGGAATTGCATTCGAAACTGTATGGCTAGAGTTTGATAGAGGTAAGTGGAATTCCGGGTGTAGCGGTGAAATGCGTAGATATCCGGAGGAACATCAGTGGCGAAGGCGGCTTACTGGATCAAAACTGACGCT…
400fe7e31a60f0845c84409f01b81378	D_0__Bacteria;D_1__Patescibacteria;D_2__ABY1;D_3__Candidatus Uhrbacteria	TCGGGAATCTTCCGCAATGCACGAAAGTGTGACGGAGCGACACCGCGTGTCGGATGAAGGCCTTCGGGTTGTAAACGACTGTTCTGAGGGACGAAACAATGACGGTACCTCAGCAGAAAGGGGTTGCTAACTCTGTGCCAGCAGCAGCGGTAATACAGAGACCCCGAGCGTTGACCGGATTTATTGGGCGTAAAGAGTGCGTAGGTGGTTTTGTAAGTCATCTGTTAAATCTTCAGGCTTAACCTGGAGGCTGCAGGTGATACTGTAAGACTAGAGTATGGGAAGGGTAGATGGAATGCCAGGTGTAGGGGTCAAATCCGTTAATATCAGGTGGAACACCAAAAGCGAAAGCAATCTACTAGAACATTACTGACACTGTTGCACGAAAGCGTGGGTAGC…
b2f97789970a58bdc76aa0c1f90ce743	D_0__Bacteria;D_1__Proteobacteria;D_2__Alphaproteobacteria;D_3__Tistrellales;D_4__Geminicoccaceae;D_5__Candidatus Alysiosphaera	TGGGGAATCTTGGACAATGGGGGCAACCCTGATCCAGCGACGCCGCGTGGGTGATGAAGGCCTTCGGGTTGTAAATCCCTTTTATCCGGGAAGATGATGACGGTACCGGGTGAATAAGCACCGGCTAACTCCGTGCCAGCAGCCGCGGTAAGACGGAGGGTGCTAGCGTTGTTCGGATTTACTGGGCGTAAAGGGCGCGTAGGCGGCCGTTCAAGTCGGGTGTGAAAGCCCGGGGCTCAACCCCGGAACTGCATTCGAAACTGAATGGCTCGAGGACGAGAGAGGAAAGTGGAATACCCAGTGTAGAGGTGAAATTCGTAGATATTGGGTGGAACACCGGTGGCGAAAGCGGCTTTCTGGCTCGTTTCTGACGCTGAGGCGCGAAAGCGTGGGGAGCAA…
b1dbf14bd7cb9918ea2e6ceaf0568fd6	D_0__Bacteria;D_1__Planctomycetes;D_2__Planctomycetacia;D_3__uncultured;D_4__uncultured planctomycete;D_5__uncultured planctomycete;D_6__uncultured planctomycete	TCGAGAATCTTCGGCAATGGGCGAAAGCCTGACCGAGCGACGCCGCGTGGTGGAAGAAGGCCTTCGGGTTGTAAACACCTGTTGGGGGGAAACAATAATGAGTGAACCCCTGAGGAAGCACGGGCTAAGTTCGTGCCAGCAGCCGCGGTAAGGCGAACCGTGCGAACGTTATTCGGAATCACTGGGCTTAAAGAGCGCGTAGGCGGCATTGTAAGTTAGAGGTGAAATCCCATCGGCTCAACCGTGGAACTGCCCCTAATACTGCAATGCTTGAGGGAGATAGGGGTATGTGGAACTTCCGGTGGAGCGGTGAAATGTGTTGATATCGGAAGGAACGCCGGTGGCGAAAGCGACATACTGGATCTCTTCTGACGCTGAGGCGCGAAAGCTAGGGTAGCG…
39c760137616dee00cee93fe5f611513	D_0__Bacteria;D_1__Planctomycetes;D_2__Planctomycetacia;D_3__Pirellulales;D_4__Pirellulaceae;D_5__Blastopirellula;D_6__uncultured deep-sea bacterium	TCGAGAATCTTCCGCAATGGACGAAAGTCTGACGGAGCGACGCCGCGTGCGGGATGAAGGCCTTCGGGTTGTAAACCGCTGTCAGAGGGGAGCAAATTTTGAGCGATCCTCAGAGGAAGCACAGGCTAAGTTCGTGCCAGCAGCCGCGGTAATACGAACTGTGCGAACGTTATTCGGAATCACTGGGCTTAAAGGGTGCGTAGGCGGCGATATAGGTCAGGTGTGAAATCCCACGGCTCAACCGTGGAACTGCGCTTGAAACCATATTGCTTGAGGAAGTCAGAGGTAAGCGGAACTGATGGTGGAGCGGTGAAATGCGTTGATATCATCAGGAACACCGGTGGCGAAAGCGGCTTACTGGGACTTTTCTGACGCTGAGGCACGAAAGCTAGGGGAGCG…
b16ae8894e16ed665372ebd5321d488b	D_0__Bacteria;D_1__Planctomycetes;D_2__Planctomycetacia;D_3__Pirellulales;D_4__Pirellulaceae;D_5__Rubripirellula;D_6__uncultured bacterium	TCGAGAATCTTCGGCAATGGACGAAAGTCTGACCGAGCGACGCCGCGTGCGGGATGAAGGCCCTCGGGTTGTAAACCGCTGTCAGTTAGGAGGAAATGCATGAGGGTTCTCTCTCATGCTTGACCGATTTTCAGAGGAAGGACGGGCTAAGTTCGTGCCAGCAGCCGCGGTAAGACGAACCGTCCAAACGTTATTCGGTATCACTGGGCTTAAAGCGTGCGTAGGCGGCTTGGTAGGTGAGATGTGAAAGCCCACGGCTCAACCGTGGAATTGCGTTTCAAACCCCCAAGCTCGAGGAAGATAGGGGTGATGGGAACTTATGGTGGAGCGGTGAAATGCGTTGATATCATAGGGAACACCGGTGGCGAAAGCGCATCACTGGATCTTTTCTGACGCTGA…
fe52028ea16f29cccdc616fc2d01ce98	D_0__Bacteria;D_1__Bacteroidetes;D_2__Bacteroidia;D_3__Chitinophagales;D_4__Saprospiraceae;D_5__uncultured;D_6__uncultured bacterium	TAAGGAATATTGGACAATGGGCGAAAGCCTGATCCAGCCATCCCGCGTGCAGGATGACGGCCCTACGGGTTGTAAACTGCTTTTTCAAGGGAAGAAACCCTCGAATTTACTTCGGGGCTGACGGTACCTTGCGAATAAGCACCGGCTAACTCCGTGCCAGCAGCCGCGGTAATACGGAGGGTGCAAGCGTTATCCGGAATCACTGGGTTTAAAGGGTGCGTAGGCGGCTATATAAGTCAGGAGTGAAATGTTCCCGCTTAACGGGAGAGCTGCTTTTGATACTGTATAGCTTGAATTAGGTTGAGGTTAGCGGAATGTGGCATGTAGCGGTGAAATGCATAGATATGCCATAGAACACCGATTGCGAAGGCAGCTAGCTGGACCTTAATTGACGCTGAG…
82718a874a1f91d1979c17962daf0aa5	D_0__Bacteria;D_1__Patescibacteria;D_2__Saccharimonadia;D_3__Saccharimonadales;D_4__uncultured bacterium;D_5__uncultured bacterium;D_6__uncultured bacterium	TAGGGAATTTTCCACAATGGTCGAAAGTCTGATGGAGCAACGCCGCGTGCAGGATGAAGGCCTTCGGGTCGTAAACTGCTTTTATGAGTGAAGATTTAAGACGGTAACTCAAGAATAAGGGACGGCTAACTACGTGCCAGCAGCCGCGGTCATACGTAGGTCCCAAGCGTTATCCGGAATTACTGGGCGTAAAGAGTTGTGTAGGCGGCCATTCAAGCAAGATGTGAAATCGTACGGCTCAACCGTATATACATGTTTTGAACTGTTTGGCTAGAGGGCGAGAGAGGTTATTGGAATTTCTTGTGTAGGAGTGAAATCCGTAGATATAAGAAGGAACACCGATGGCGTAGGCAGATAACTGGCTCGCTCCTGACGCTCAGACACGAAAGCGTGGGTAGC…
9fbfef0cb0bd6b0bae3cf483b5834e89	D_0__Bacteria;D_1__Chloroflexi;D_2__Anaerolineae;D_3__Anaerolineales;D_4__Anaerolineaceae;D_5__uncultured;D_6__uncultured hydrocarbon seep bacterium BPC110	TAGGGAATATTGCACAATGGGCGAAAGCCTGATGCAGCAACGCCGCGTGCGCGAAGAAGGCCTTCGGGTTGTAAAGCGCTTTTCTGGAGGAAGAGGAAGGACGGTACTCCAGGAATAAGGATCGGCTAACTACGTGCCAGCAGCCGCGGTAACACGTAGGATCCGAGCGTTATCCGAATTTACTGGGCGTAAAGCGCGTGTAGGCGGCCAAGTAAGTTGGACGTGAAAGCTCCTGGCTCAACTAGGAGAGGTCGTTCAAAACTGCCTGGCTAGAGGGCGACAGAGGGAGGTGGAATTCCCGGTGTAGTGGTGAAATGCGTAGATATCGGGAGGAACACCAGTGGCGAAGGCGGCCTCCTGGGTCGCCCCTGACGCTCAGACGCGAAAGCTAGGGGAGCA…
40d4f73bdd72d2432a3d38046e326dc6	D_0__Bacteria;D_1__Hydrogenedentes;D_2__Hydrogenedentia;D_3__Hydrogenedentiales;D_4__Hydrogenedensaceae;D_5__uncultured bacterium;D_6__uncultured bacterium	TAAGGAATATTGGTCAATGGACGCAAGTCTGAACCAGCCATGCCGCGTGCAGGAAGACAGCCTTATGGGTTGCAAACTGCTTTTATACAGGAATAAACCCCCTTTCGTGAAAGGGGCTGAAGGTACTGTACGAATAAGGACCGGCTAACTCCGTGCCAGCAGCCGCGGTAATACGGAGGTTCCTAGCGTTGTTCGGAATTACTGGGCGTAAAGGGAGCGCAGGCGGATCGGTCAGTGGAAAGTGGAATCCCAGGGCTCAACCTTGGAAGTGCTTTCCATACTGCCGGTCTTGAGTACGTGAGAGGAAGGCGGAATTCAGGGTGTAGCGGTGAAATGCTTAGATATCCTGAGGAACACCAGTGGCGAAAGCGGCCTTCTGGCACTGTACTGACGCTGAGG…
64075744d8b715ceff0ca44169c81dbb	D_0__Bacteria;D_1__Proteobacteria;D_2__Gammaproteobacteria;D_3__Gammaproteobacteria Incertae Sedis;D_4__Unknown Family;D_5__uncultured;D_6__uncultured hydrocarbon seep bacterium BPC022	TGAGGAATATTGGACAATGGAGGCAACTCTGATCCAGCCATGCCGCGTGCAGGAAGACGGCCCTATGGGTTGTAAACTGCTTTTATATAGGAAGAAACCTTTTCACGTGTGAGAAGTTGACGGTACTATAAGAATAAGGACCGGCTAACTCAGTGCCAGCAGCCGCGGTAATACTGAGGGTGCAAGCGTTAATCGGAATTACTGGGCGTAAAGCGAGTGTAGGCGGCTGCATAAGTCGGATGTGAAAGCCCTGGGCTTAACCTGGGAATTGCATTCGATACTGTGCAGCTAGAGTTTGGTAGAGGGAAGTGGAATTCCAGGTGTAGCGGTGAAATGCGTAGAGATCTGGAGGAACATCAGTGGCGAAGGCGGCTTCCTGGATCAAAACTGACGCTGAGG…
633e27a24bc249253cfa08afe995f17a	D_0__Bacteria;D_1__Epsilonbacteraeota;D_2__Campylobacteria;D_3__Campylobacterales;D_4__Thiovulaceae;D_5__Sulfurimonas;D_6__uncultured marine bacterium	TGAGGAATATTGGGCAATGGAGGCAACTCTGACCCAGCCATGCCGCGTGTAGGAAGACGGTCCTATGGATTGTAAACTACTTTTATATGGGAAGCATCGCCGGAACGTGTTCTGGTTTGACTGTACCATATGAATAAGCACCGGCTAACTCCGTGCCAGCAGCCGCGGTAATACGGAGGGTGCAAGCGTTATTCGGAATCACTGGGCGTAAAGGACGCGTAGGCGGGATGCCAAGTCTGATGTGAAATCCTATGGCTTAACCATAGAACTGCATTGGAAACTGGTAACCTAGAGTATGGGAGGGGGAGATGGAATTAGTGGTGTAGGGGTAAAATCCGTAGATATCACTAGGAATACCGAAAGCGAAGGCGATCTCCTGGAACAATACTGACGCTAAGG…
1ae2b2f3b34801fd7d4186a21ae81438	D_0__Bacteria	TCGAGAATCTTCGGCAATGGGCGCAAGCCTGACCGAGCGACGCCGCGTGCGGGATGAAGGCCTTCGGGTTGTAAACCGCTGTCAGAGGGGAGGAAATGTTTGAGGGTACTCTCTCATACTTGACCGATCCTCAGAGGAAGTACGGGCTAAATACGTGCCAGCAGCCGCGGTAATACGTATGGGGCAAGCGCTACTCGGATTTATTGGGCGTAAAGCGAATGTAGGCTGTTTACTCAGTCAGTGGTGAAATCCCTCGGCTCAACCGAGGAATAGCCTTTGATACTGGTAAACTAGAGGACAGGAGAGGAAAGTGGAATTTCCGGTGTAGCGGTGGAATGCGTAGATATCGGAAGGAACACCAGAGGCGAAGGCGGCTTTCTGGACTGTACCTGACGCTGA…
7ae4f95d393ad9922c4349bee3f3d6ce	D_0__Bacteria;D_1__Bacteroidetes;D_2__Bacteroidia;D_3__Sphingobacteriales;D_4__Lentimicrobiaceae;D_5__uncultured bacterium;D_6__uncultured bacterium	TAGGGAATATTGGGCAATGGACGCAAGTCTGACCCAGCCATGCCGCGTGAAGGATGACGGCCCTATGGGTTGTAAACTTCTTTTATACGGGAAGAAACTTCCGGACTTGTCCGGAACTGACGGTACCGTACGAATAAGCATCGGCTAACTCCGTGCCAGCAGCCGCGGTAATACGGAGGATGCGAGCGTTATCCGGATTTATTGGGTTTAAAGGGTGCGCAGGCGGAACAATAAGTCAGTGGTGAAATCCTACGGCTCAACCGTAGAACTGCCATTGATACTGTTGTTCTTGAGTATAGTTGAAGTAGGCGGAATGTGTTGTGTAGCGGTGAAATGCATAGATATGACACAGAACTCCGATCGCGAAGGCAGCTTACTAAACTATAACTGACACTCATG…
e488a62830a465c8f9b6bcec9bbd60fa	D_0__Bacteria;D_1__Planctomycetes;D_2__Planctomycetacia;D_3__Planctomycetales;D_4__Gimesiaceae;D_5__uncultured;D_6__uncultured bacterium	TCGAGAATCTTCGGCAATGGACGCAAGTCTGACCGAGCGACGCCGCGTGCGGGATGAAGGCCCTTGGGTTGTAAACCGCTGTCAGAGGGGATGAAATTCCAGAGGGCTATCCCTTTGGATTGACAGAGCCTCAGAGGAAGCACGGGCTAAGTACGTGCCAGCAGCCGCGGTAACACGTACTGTGCGAACGTTATTCGGAATCACTGGGCTTAAAGGGTGCGTAGGCGGCCAGGCAAGTAGGATGTGAAATCTTCCGGCTCAACCGGAAAACTGCGTTCTAAACTGCCTGGCTTGAGTGAGATAGGGGTGTGCGGAACTTCCAGTGGAGCGGTGAAATGTGTTGATATTGGAAGGAACGCCGTTAGCGAAAGCGGCACACTGGGTCTCAACTGACGCTGA…
b35ead0ac224b150c747d328731ca708	D_0__Archaea;D_1__Euryarchaeota;D_2__Thermoplasmata;D_3__Marine Group II;D_4__uncultured marine group II euryarchaeote HF10_15G04;D_5__uncultured marine group II euryarchaeote HF10_15G04;D_6__uncultured marine group II euryarchaeote HF10_15G04	GCGCGAAAACTTCACACTGCAGGAAACTGTGATGAGGGAACTCCAAGTGCGCGCACTTAGTGTGTGCTTTTTTCAACTATTAATCGGTTGAAGAATAAGGGCTGGGAAAGACCGGTGCCAGCCGCCGCGGTAATACCGGCAGCTCAAGTGGTCGTCGCTTTTATTGGGCCTAAAACGTCCGTAGCCTGTTCGGTAAATCTGTGGGTAAATCGACCGGCTTAACTGGTTGAATTCTGCAGAGACTGCCAGACTAGGGACCGGGAGAGGTGTGGGGTACTCTAGGGGTAGGGGTAAAATCCTGTCATCCTTAGAGGACCACCAGTTGCGAAGGCGCCACACTGGAACGGATCCGACGGTCAGGGACGAAGCCTAGGGGCACGAACC
63ca3b2fca2fb12f98aec2c4a266c916	D_0__Bacteria;D_1__Acidobacteria;D_2__Subgroup 21;D_3__uncultured bacterium;D_4__uncultured bacterium;D_5__uncultured bacterium;D_6__uncultured bacterium	TGGGGAATTTTGGGCAATGGGGGAAACCCTGACCCAGCAACGCCGCGTGGAGGAAGAAGGTTTTCGGATCGTAAACTCCTGTCCGGAGGGACGAAGAAAGTGACGGTACCTCTGGAGGAAGCCCCGGCTAACTCCGTGCCAGCAGCCGCGGTAATACGGGGGGGGCAAGCGTTGTTCGGAATTACTGGGCGTAAAGGGCGCGCAGGCGGTTTCGTCAGTCATGGGTGAAAGCCCCGGGCTCAACCCGGGAATGGCCTGTGAAACCACGGAACTGGAGTGCTGGAGAGGGAAGCGGAATTCCCAGTGTAGCGGTGAAATGCGTAGATATTGGGAGGAACATCTGTGGCGAAGGCGGCTTCCTGGACAGACACTGACGCTGAGGCGCGAAAGCCAGGGGAG…
d6859a6afd08acc56a47af3d15bbdc00	D_0__Bacteria;D_1__Bacteroidetes;D_2__Bacteroidia;D_3__Flavobacteriales;D_4__Flavobacteriaceae;D_5__Aquibacter	TGAGGAATATTGGGCAATGGAGGCAACTCTGACCCAGCCATGCCGCGTGCAGGAAGACTGCCCTATGGGTTGTAAACTGCTTTTATACAGGAAGAAACATCTCTACGTGTAGAGACTTGACGGTACTGTAAGAATAAGGATCGGCTAACTCCGTGCCAGCAGCCGCGGTAATACGGAGGATCCAAGCGTTATCCGGAATCATTGGGTTTAAAGGGTCCGTAGGTGGATAATTAAGTCAGAGGTGAAATCCTGCAGCTCAACTGTAGAATTGCCTTTGAAACTGGTTATCTTGAGTTATTATGAAGTAGTTAGAATATGTAGTGTAGCGGTGAAATGCATAGATATTACATAGAATACCAATTGCGAAGGCAGATTACTAATAATATACTGACACTGATG…
4317d1e1b3ff097b37b9ed8dd1c3d305	D_0__Bacteria;D_1__Bacteroidetes;D_2__Bacteroidia;D_3__Bacteroidales;D_4__Bacteroidaceae;D_5__Bacteroides	TGAGGAATATTGGTCAATGGGCGCGAGCCTGAACCAGCCAAGTAGCGTGAAGGATGACTGCCCTATGGGTTGTAAACTTCTTTTAATGGGGAATAAAGTGAGACACGTGTTGTCTTTTTGCATGTACCCATCGAATAAGGACCGGCTAACTCCGTGCCAGCAGCCGCGGTAATACGGAGGGTCCGAGCGTTATCCGGATTTATTGGGTTTAAAGGGTGCGTAGGCGGGATACTAAGTCAGCTGTGAAAGTTTAATGCTCAACATTGAAATTGCAGTTGAAACTGGTATTCTTGAGTGTAGTGGAAGTAGGTGGAATTCGTGGTGTAGCGGTGAAATGCTTAGATATCACGAAGAACTCCGATTGCGAAGGCAGCTTACTATCCTACAACTGACGCTGAG…
73fef49b8d697f016050df37a62bb51f	D_0__Bacteria;D_1__Actinobacteria;D_2__Acidimicrobiia;D_3__Microtrichales;D_4__Ilumatobacteraceae;D_5__Ilumatobacter;D_6__uncultured bacterium	TGGGGAATCTTGCACAATGGGCGAAAGCCTGATGCAGCAACGCCGCGTGCGGGAAGACGGCCTTAGGGTTGTAAACCGCTTTCAGCAGGGAAGAAAATGACGGTACCTGCAGAAGAAGATGCGGCCAACTACGTGCCAGCAGCCGCGGTGACACGTAGGCATCGAGCGTTATCCGGATTTATTGGGCGTAAAGAGCTCGTAGGCGGTTCGGTAAGTCGGGTGTGAAAACTCTGGGCTCAACCCAGAGAGGCCACTCGATACTGCTGTGACTAGAGTGCGGTAGGGGAGCGGGGAATTCCTGGTGTAGCGGTGAAATGCGCAGATATCAGGAGGAACACCAGTGGCGAAGGCGCCGCTCTGGGCCGTAACTGACGCTGAGGAGCGAAAGCATGGGTAGCA…
b7ae8a1363e7a9d7c5fde7eb0c9c0297	D_0__Bacteria;D_1__Bacteroidetes;D_2__Ignavibacteria;D_3__Ignavibacteriales;D_4__Ignavibacteriaceae;D_5__Ignavibacterium;D_6__uncultured bacterium	TGAGGAATATTGGGCAATGGGCGAAAGCCTGACCCAGCAACGCCGCGTGGAGGATGAATGTCGTAAGATTGTAAACTCCTGTTAGAGGGGAAGAATAATTCCGATCGAATCGGAACTTGACTGTACCCTCAGAGAAAGCTCCGGCTAACTACGTGCCAGCAGCCGCGGTAATACGTAGGGAGCAAGCGTTGTCCGGATTTACTGGGTGTAAAGGGCGCGCAGGCGGGTTGACAAGTCAGAGGTGAAATCCTACAGCTTAACTGTAGAACTGCCTTTGAGACTGTCAATCTTGAGTACGGAAGAGAGAGATGGAATTCCAGGTGTAGTGGTGAAATACGTAGATATCTGGAAGAACACCAGTGGCGAAGGCGGTCTCTTGGTCCATTACTGACGCTGAGG…
d59661d744561d8f371009bae1f6140a	D_0__Bacteria;D_1__Actinobacteria;D_2__Actinobacteria;D_3__Propionibacteriales;D_4__Propionibacteriaceae;D_5__uncultured;D_6__Gram-positive bacterium SOGA22	TGGGGAATATTGCGCAATGGGCGAAAGCCTGACGCAGCAACACCGCGTGAGGGACGACGGCCTTCGGGTTGTAAACCTCTTTCAGCTCCGACGAAGCGAAAGTGACGGTAGGAGCAGAAGAAGCACCGGCTAACTACGTGCCAGCAGCCGCGGTAATACGTAGGGTGCAAGCGTTGTCCGGAATTATTGGGCGTAAAGAGCTCGTAGGCGGTCCGTTGCGTCTGCCGTGAAAACCCGGGGCTCAACCCCGGGCCTGCGGTGGATACGGGCGGACTAGAGTCCGGTAGGGGAGACTGGAATTCCTGGTGTAGCGGTGGAATGCGCAGATATCAGGAGGAACACCGGTGGCGAAGGCGGGTCTCTGGGCCGGTACTGACGCTGAGGAGCGAAAGCGTGGGG…
b83a244c39a087c11f9eb1d0e045c108	D_0__Bacteria;D_1__Bacteroidetes;D_2__Bacteroidia;D_3__Flavobacteriales;D_4__Flavobacteriaceae;D_5__Aurantivirga;D_6__uncultured Flavobacteriaceae bacterium	TGAGGAATATTGGGCAATGGAGGCAACTCTGACCCAGCCATGCCGCGTGCAGGAAGACTGCCCTATGGGTTGTAAACTGCTTTTATACAGGAAGAAACACACCTACGTGTAGGTGCTTGACGGTACTGTAAGAATAAGCACCGGCTAACTCCGTGCCAGCAGCCGCGGTAATACGGAGGGTGCAAGCGTTATCCGGAATCATTGGGTTTAAAGGGTCCGCAGGCGGTCAATTAAGTCAGAGGTGAAATCCCATAGCTCAACTATGGAACTGCCTTTGATACTGGTTGACTTGAGTTATACGGAAGTAGATAGAATAAGTAGTGTAGCGGTGAAATGCATAGATATTACTTAGAATACCGATTGCGAAGGCAGTCTACTACGTATATACTGACGCTCATG…
de9b7101715bd5c1a700b797faa5a8dc	D_0__Bacteria;D_1__Verrucomicrobia;D_2__Verrucomicrobiae;D_3__Opitutales;D_4__Puniceicoccaceae;D_5__Pelagicoccus;D_6__uncultured marine bacterium	TTTCGAATCTTTCACAATGGGCGAAAGCCTGATGGAGCAACGCCGCGTGGGGGATGAAGGTCTTCGGATTGTAAACCCCTGTCACCAAGGATAAACCGTAGTCGGTTAACACCCGGCTGCCTGATGTAACTTGGAGAGGAAGAGGTGGCTAACTCTGTGCCAGCAGCCGCGGTAATACAGAGACCTCAAGCGTTATTCGGATTTACTGGGCGTAAAGGGTGCGCAGGCGGCCAAGTGTGTCGGAGGTGAAATCTTGCAGCTTAACTGTAAAATTGCCTACGAAACTACTTGGCTAGAGTATCGGAGAGGATAGCGGAATTCCAGGTGTAGCAGTGAAATGCGTAGATATCTGGAGGAACACCAATGGCGAAGGCAGCTATCTGGACGATTACTGACGCT…
9d71d0b36460c2be1e250f7e9eeab763	D_0__Bacteria;D_1__Bacteroidetes;D_2__Bacteroidia;D_3__Sphingobacteriales;D_4__Lentimicrobiaceae;D_5__uncultured organism;D_6__uncultured organism	TAAGGAATATTGGTCAATGGACGCAAGTCTGAACCAGCCATGCCGCGTGCAGGATGACTGCCCTACGGGTTGTAAACTGCTTTTATATGGGAAGAACTCCCCCGACGTGTCGGGGGCTGACGGTACCATGTGAATAAGCATCGGCTAACTCCGTGCCAGCAGCCGCGGTAATACGGAGGATGCAAGCGTTATCCGGATTTATTGGGTTTAAAGGGTGCGTAGGCGGAATGATAAGTCAGTGGTGAAATCCCCCGGCTCAACCGGGGAACTGCCATTGATACTGCCATTCTTGAGTACAGTTGAGGTGGGTGGAATGTATCATGTAGCGGTGAAATGCATAGATATGATACAGAACACCGATAGCGAAGGCAACTCACCAAACTGTAACTGACGCTGAGG…
d481c01a50ffe86aef468eba0fe9360b	D_0__Bacteria;D_1__Cyanobacteria;D_2__Oxyphotobacteria;D_3__Chloroplast;D_4__Virgulinella fragilis;D_5__Virgulinella fragilis;D_6__Virgulinella fragilis	TGGGGAATTTTCCGCAATGGGCGAAAGCCTGACGGAGCAATACCGCGTGAGGGAAGACGGCCTATGGGTTGTAAACCTCTTTTTTCAGGGAGGAATTCAATGACGTGTACCTGAAGAATAAGCATCGGCTAACTCCGTGCCAGCAGCCGCGGTAAGACGGAGGATGCAAGTGTTATCCGGAATCACTGGGCGTAAAGCGTCTGTAGGTGGTTAAACAAGTCAACTGTTAAATCTTGAAGCTCAACTTCGAAATCGCAGTCGAAACTGTTTGACTAGAGTATAGTAGGGGTAAAGGGAATTTCCAGTGGAGCGGTGAAATGCGTAGATATTGGAAAGAACACCGATGGCGAAGGCACTTTACTGGGCTATTACTGACACTCAGAGACGAAAGCTAGGGTA…
734dcd7dc2b50c7900d35e732e87f255	D_0__Bacteria;D_1__Bacteroidetes;D_2__Bacteroidia;D_3__Chitinophagales;D_4__Saprospiraceae;D_5__Portibacter;D_6__uncultured Bacteroidetes bacterium	TAAGGAATATTGGACAATGGAGGCAACTCTGATCCAGCCATCCCGCGTGCAGGATGACAGCCCTCTGGGTTGTAAACTGCTTTTGGAAGGGAAGAACTCCCTGGTTTTAACTAGGGCTGACGGTACCTTCAGAATAAGCACCGGCTAACTCCGTGCCAGCAGCCGCGGTAATACGGAGGGTGCAAGCGTTATCCGGAATCACTGGGTTTAAAGGGTGCGTAGGCGGCGCTATAAGTCAGATGTGAAAGCCCACCGCTCAACGGTGGAACTGCATTTGATACTGTAGTGCTTGAATCAGGCTGAGGTCAGCGGAATGTGTCATGTAGCGGTGAAATGCATAGATATGACATAGAACACCAATTGCGAAGGCAGCTGGCTAGACCTGAATTGACGCTGAGG…
13a584e5b2b9096607f52e6ebf6d9c47	D_0__Bacteria;D_1__Bacteroidetes;D_2__Bacteroidia;D_3__Chitinophagales;D_4__Saprospiraceae;D_5__Portibacter;D_6__uncultured deep-sea bacterium	TAAGGAATATTGGACAATGGAGGAAACTCTGATCCAGCTATCCCGCGTGCAGGATGACGGCCCTACGGGTTGTAAACTGCTTTTAGTAGGGACGAAACCCCTCGATTTATCGAGGGCTGACGGTACCTACAGAATAAGCACCGGCTAACTCCGTGCCAGCAGCCGCGGTAATACGGAGGGTGCAAGCGTTATCCGGAATCACTGGGTTTAAAGGGTGCGTAGGTGGTTTGATAAGTCAGAGGTGAAAGCCCACCGCTTAACGGTGGAACTGCCTTTGATACTGTCAGACTTGAATAAGGTTGAGGTCGGCGGAATGTGTCATGTAGCGGTGAAATGCATAGATATGACATAGAACACCAATTGCGAAGGCAGCTGGCTAGACCTTTATTGACACTGAGG…
694384c1d62d93f74b289d899be907b0	D_0__Bacteria;D_1__Proteobacteria;D_2__Deltaproteobacteria;D_3__Desulfobacterales;D_4__Desulfobacteraceae;D_5__Sva0081 sediment group	TCGAGAATCTTCCGCAATGGACGAAAGTCTGACGGAGCGACGCCGCGTGGACGATGAAGGCCTTAGGGTTGTAAAGTCCTTTCGCTAGGGAAGATAATGACGGTACCACTGAAGGAAGCACCGGCTAACTCCGTGCCAGCAGCCGCGGTAATACGGGGGGTGCAAGCGTTATTCGGAATTACTGGGCGTAAAGAGCGCGTAGGCGGTCTCTTAAGTCGGATGTGAAAGCCCGGGGCTTAACCCCGGAAGTGCATTCGAAACTAAGGGACTTGAGTATGGGAGAGGGAAGTGGAATTCCTGGTGTAGCGGTGAAATGCGTAGATATCAGGAGGAACACCGGTGGCGAAGGCGACTTCCTGGACCAATACTGACGCTGAGGCGCGAAGGCGTGGGGAGCAA…
8c277c00ebcee93af5e12234ae09bf1a	D_0__Bacteria;D_1__Verrucomicrobia;D_2__Verrucomicrobiae;D_3__Pedosphaerales;D_4__Pedosphaeraceae	TCGAGAATCTTTCACAATGGGCGAAAGCCTGATGGAGCGACGCCGCGTGGGGGATGAAGGCCTTCGGGTCGTAAACCCCTGTCATCTGGGAGCAAATCTGTTCGGTTAATACCTGAGCAGTTGATAGTACCAGAAGAGGAAGGGACGGCTAACTCTGTGCCAGCAGCCGCGGTAATACAGAGGTCCCAAGCGTTGTTCGGATTCACTGGGCGTAAAGGGTGCGTAGGCGGTATGGTAAGTCAGATGTGAAATCCCAGGGCTCAACCCTGGAACTGCATCCGATACTGCCGTACTTGAGGACCGGAGAGGAGACTGGAATTCTCGGTGTAGCAGTGAAATGCGTAGATATCGAGAGGAACACTCGTGGCGAAAGCGAGTCTCTGGACGGATCCTGACGCT…
31f2c2734d55046bec116aa6f3884828	D_0__Bacteria;D_1__Proteobacteria;D_2__Deltaproteobacteria;D_3__Myxococcales	TGGGGAATTTTGCGCAATGGGCGAAAGCCTGACGCAGCGACGCCGCGTGAGTGATGAAGGCCCTCGGGTTGTAAAGCTCTGTGGGGAGGGAAGAATAAGGCATGGCCAATACCCATGTCGATGACGGTACCTCCTTAGCAAGCACCGGCTAACTCTGTGCCAGCAGCCGCGGTAAGACAGAGGGTGCGAACGTTGTTCGGAATTACTGGGCGTAAAGCGCGTGTAGGCGGACCGATAAGTCAGATGTGAAATCCCTGGGCTCAACCCAGGAACTGCATTTGAAACTGTCGGTCTTGAGTAATGGAGAGGAAAGCGGAATTCCCGGTGTAGAGGTGAAATTCGTAGATATCGGGAGGAACACCAGTGGCGAAGGCGGCTTTCTGGACATTTACTGACGCT…
b225efaf594814757ff4a1cc20ca7c31	D_0__Bacteria;D_1__Bacteroidetes;D_2__Bacteroidia;D_3__Bacteroidales;D_4__Prolixibacteraceae;D_5__Draconibacterium;D_6__uncultured bacterium	TGAGGAATATTGGGCAATGGAGGCAACTCTGACCCAGCCATCCCGCGTGCAGGATGACGGCCCTATGGGTTGTAAACTGCTTTTGTTTGCCAAGAATGGTTACTACGTGTAGTAATTTGACGGTAGCAAATGAATAAGGACCGGCTAACTCCGTGCCAGCAGCCGCGGTAATACGGAGGGTCCAAGCGTTATCCGGATTCATTGGGTTTAAAGGGTGCGCAGGCGGGCCTTTAAGTCAGTGGTGAAATCTTGCCGCTTAACGGTAAAATTGCCATTGATACTGAAGGTCTTGAATATGGTTGAGGTAGGCGGAATGTGTTGTGTAGCGGTGAAATGCATAGATATGACACAGAACGCCGATTGCGAAGGCAGCTTACTAAGCCATTATTGACGCTGAGG…
4515fcc1f19f6a10d7f03f6ce170d424	D_0__Bacteria;D_1__Chlamydiae;D_2__Chlamydiae;D_3__Chlamydiales;D_4__Simkaniaceae;D_5__uncultured;D_6__Chlamydiae bacterium SM23_39	TCGAGAATCATTCGCAATGGGGGAAACCCTGACGATGCGACGCCGTGTGAACGAAGAAGGCCCTCGGGTTGTAAAGTTCTTTCGCTTGTGAGCAAGAAAGTGAGAGTAGCAGGTAAAGAAGCACCGGCTAACTCCGTGCCAGCAGCTGCGGTAATACGGAGGGTGCAAGCATTAATCGGAATTATTGGGCGTAAAGAGCGCGTAGGCTACTTATCAAGTCTTTGATGAAATACTAATGCTTAACATTAGTGCTGTCGAAGATACTGATAGGTTAGAGGATGGACGGAGAAAATGGAATTTCACGTGTAGCGGTGAAATGTGTAGATATGTGAAAGAACACCGGTGGCGAAAGCGGTTTTCTAGTTTAGACCTGACGCTGAGGCGCGAGAGCTAGGGGAG…
0bca265f3b4f2e9e0789ab1f1b4428ab	D_0__Bacteria;D_1__Bacteroidetes;D_2__Bacteroidia;D_3__Chitinophagales;D_4__Saprospiraceae;D_5__Phaeodactylibacter;D_6__uncultured bacterium	TAAGGAATATTGGACAATGGGCGAAAGCCTGATCCAGCCATCCCGCGTGCAGGATGACGGCCCTATGGGTTGTAAACTGCTTTTGTCAGGGAAGAACTCCCAGATCTTGCATCTGGGCTGACGGTACCTGAAGAATAAGCACCGGCTAACTCCGTGCCAGCAGCCGCGGTAATACGGAGGGTGCAAGCGTTATCCGGAATCACTGGGTTTAAAGGGTGCGTAGGCGGCTTGGTAAGTCAGAAGTGAAAGCTCACCGCTTAACGGTGGAACTGCTTTTGATACTGCCAGGCTTGGATCGGCACGAGGCAGGCGGAATGTGGCATGTAGCGGTGAAATGCTTAGATATGCCATAGAACACCGATTGCGTAGGCAGCTTGCCAGAGCCGTATCGACGCTGAG…
3eeb84b62c807e3a401e86012ad387b2	D_0__Bacteria;D_1__Proteobacteria;D_2__Gammaproteobacteria;D_3__Gammaproteobacteria Incertae Sedis;D_4__Unknown Family;D_5__uncultured	TAGGGAATATTGCACAATGGGCGAAAGCCTGATGCAGCAATGCCGCGTGTGTGAAGAAGGCCTGCGGGTTGTAAAGCACTTTTATCGGGAAAGAAAAAACCGGGGCTAATATCCCTGGTCTTGACGGTACCCGAAGAATAAGCACCGGCTAACTCCGTGCCAGCAGCCGCGGTAATACGGAGGGTGCAAGCGTTAATCGGAATTACTGGGCGTAAAGCGAGTGTAGGCGGCAACGTAAGTCGGATGTGAAAGCCCTGGGCTTAACCTGGGAATTGCATTCGAAACTGCGTAGCTAGAGTTTGACAGAGGGATGTGGAATTCCGGGTGTAGCGGTGAAATGCGTAGATATCCGGAGGAACACCAGTGGCGAAGGCGGCATCCTGGGTCAAAACTGACGCT…
69d3e81ccad94b5a4cc52ead39d45ba6	D_0__Bacteria;D_1__Proteobacteria;D_2__Alphaproteobacteria;D_3__Micavibrionales;D_4__Micavibrionaceae;D_5__uncultured;D_6__uncultured bacterium	TGAGGAATATTGGACAATGGAGGAAACTCTGATCCAGCCATGCCGCGTGTATGAAGAAGGCCTTAGGGTTGTAAAGTACTTTCAGTAGTGAAGATAATGACGGTAACTACAGAAGAAGCTCCGGCTAAATTCGTGCCAGCAGCCGCGGTAATACGAATGGAGCAAGCGTTGTTCAGAATCACTGGGCTTAAAGCGTGCGCAGGCAGACTTGGAAGTCAGAAGTGAAATCCCAGAGCTCAACTCTGGAACTGCTTTTGAAACTCCAAGTCTAGAATTCGATAGAGGTAAGGGGAATTCCTAGTGTAGAGGTGAAATTCGCAGATATTAGGAGGAACACCAGTGGCGTAGGTGCCTTACTGGGTCGATATTGACGCTCATGTACGAAAGCGTGGGGAGCAA…
7e6764f01fa36cc25c6ea719065998cb	D_0__Bacteria;D_1__Nitrospirae;D_2__Thermodesulfovibrionia;D_3__uncultured;D_4__uncultured bacterium;D_5__uncultured bacterium;D_6__uncultured bacterium	TGGGGAATTTTGCGCAATGGGCGAAAGCCTGACGCAGCGACGCCGCGTGGAGGACGAAGGCCTTTGGGTTGTAAACTCCTTTAGTACGGGAAGAAGCCTTCGGGTGACGGTACCGTAAGAATAAGCCACGGCTAACTCCGTGCCAGCAGCCGCGGTAAGACGGAGGTGGCGAGCGTTGTTCGGAATTACTGGGCTTAAAGGGCGCGTAGGCGGTATGTTAAGTCGAAGGTGGAAGGCATGGGCTCAACCCATGGACAGCCTTCGAAACTGGCGTACTTGAGTCGTGCAGGGGATGGCGGAATTCCAGGTGTAGCGGTGAAATGCGTAGATATCGGGAGGAACATCAGTGGCGAAGGCGGCCACCTGGACATTTACTGACGCTGAGACGCGAAAGCGTGG…
e8837616c24e6c1823563d9709191d17	D_0__Bacteria;D_1__Planctomycetes;D_2__Planctomycetacia;D_3__Pirellulales;D_4__Pirellulaceae;D_5__Pir4 lineage	TCGAGAATCTTCGGCAATGGACGCAAGTCTGACCGAGCGACGCCGCGTGCGGGATGAAGGCTTTCGGGTTGTAAACCGCTGTCAGAGGGGAGGAAATCTCCAGGGGCTATCCCCTGGAGTTGACCTATCCTCAGAGGAAGGACGGGCTAAGTTCGTGCCAGCAGCCGCGGTAACACGAACCGTCCGAACGTTATTCGGAATCACTGGGCTTAAAGGGTGCGTAGGCGGTGCGGCAAGTCGGATGTGAAATCCCTCGGCTCAACCGAGGAATTGCGTCCGAAACTGCCGTGCTAGAGGGAGATAGGGGTGAGCGGAACTCACGGTGGAGCGGTGAAATGCGTTGATATCGTGAGGAACACCGGTGGCGAAGGCGGCTCACTGGATCTCTTCTGACGCTGA…
17ccb05bc1134ceccbcbfc33b067718e	D_0__Bacteria;D_1__Fibrobacteres;D_2__Fibrobacteria;D_3__Fibrobacterales;D_4__Fibrobacteraceae;D_5__uncultured;D_6__uncultured Fibrobacteres bacterium	CCGCGGTAATACGAGGGGTGCAAGCGTTGTTCGGAATCACTGGGCGTAAAGGGTCCGTAGGCGGATACACAAGTCAGATGTTTAATTTCGAGGCCTAACTTCGAGCTTGCATTTGAAACTGTGTATCTTGAATAGATCAGAGGTTGATGGAATACTTGGTGTAGCGGTGGAATGCGTAGATATCAAGTAGAACACCAATGGCGAAGGCAGTCAACTGGGATCATATTGACGCTGAGGGACGAAAGCGTGGGTAGCAAACA
9f6876c7b2332eb83dcc41a1c4b69459	D_0__Bacteria;D_1__Bacteroidetes;D_2__Bacteroidia;D_3__Chitinophagales;D_4__Saprospiraceae;D_5__uncultured;D_6__uncultured Bacteroidetes bacterium	TAAGGAATATTGGTCAATGGACGCAAGTCTGAACCAGCCATGCCGCGTGCAGGATGACAGCCCTATGGGTTGTAAACTGCTTTTGTAAGAGAAGAAACCTTCTCATTTATGAGAAGCTGACGGTATCTTAAGAATAAGCACCGGCTAACTCCGTGCCAGCAGCCGCGGTAATACGGAGGGTGCAAGCGTTATCCGGAATCACTGGGTTTAAAGGGTGCGTAGGTGGCTCAATCAGTCAGAGGTGAAATCTTGCGGCTTAACCGTAAAATTGCCTTTGATACTGTTGGGCTTGAATTAGGTTGAGGTTGGCGGAATGTGGCATGTAGCGGTGAAATGCATAGATATGCCATAGAACACCAATTGCGAAGGCAGCTGACTAGACCTTAATTGACACTGAGG…
eb08dc5b71a65fad4d77c71d6ee0b18e	D_0__Bacteria;D_1__Chloroflexi;D_2__Anaerolineae;D_3__ADurb.Bin180;D_4__uncultured bacterium;D_5__uncultured bacterium;D_6__uncultured bacterium	TTAGGAATCTTGCGCAATGGGCGAAAGCCAGACGCAGCAACGCCGCGTGGGCGACGAAGGTCTTCGGATCGTAAAGCCCTTTTCCAGAGGAAGAGGAAGGACAGTACTCTGGGAATAAGTCTCGGCTAACTACGTGCCAGCAGCCGCGGTAAAACGTAGGAGGCGAGCGTTATCCGGATCTATTGGGCGTAAAGCGCGTGCAGGCGGTGCTTTAAGTTGGACGTAAAATCTCCCGGCCCAACTGGGAGGGGCCGTTCAATACTGGGGCACTTGAGGTCAGAAGAGGGAAGTGGAATTCCCGGTGTAGCGGTGGAATGCGTAGATATCGGGAGGAACATCAGTGGCGAAGGCGGCCACCTGGACATTTACTGACGCTGAGACGCGAAAGCGTGGGGAGCA…
7ebb9fbe69f7aabc56b283c0fe409232	D_0__Bacteria;D_1__Verrucomicrobia;D_2__Verrucomicrobiae;D_3__Opitutales;D_4__Puniceicoccaceae;D_5__Verruc-01;D_6__uncultured Verrucomicrobiae bacterium	TTTCGAATCATTCACAATGAGGGAAACCTTGATGGTGCAACGCCGCGTGGGGGATGACGGCCTTCGGGTTGTAAACCCCTGTCACCAGGGACTAACCGCACGGTTTATACCCGTGCCTGAATTAACCTGGAGAGGAAGCAGTGGCTAACTCCGTGCCAGCAGCCGCGATAATACGGAGACTGCAAGCGTTACTCGGATTTACTGGGCGTAAAGGGTCCGTAGGCGGCCACGTGTGTCGGGTGTGAAATACTGCAGCTCAACTGCAGAACTGCGCTCGAAACTACATGGCTAGAGTATCGGAGAGGTGAGCGGAATTCCAGGTGTAGCGGTGAAATGCGTAGATATCTGGAGGAACACCAACGGCGAAGGCAGCTCACTGGACGATTACTGACGCTGAGG…
7f90988eabbd702c6b885fe6c4461ffe	D_0__Bacteria;D_1__Planctomycetes;D_2__Phycisphaerae;D_3__S-70;D_4__uncultured bacterium;D_5__uncultured bacterium;D_6__uncultured bacterium	TAACGAATATTCCGCAATGGGCGAAAGCCTGACGGAGCGACGCCTCGTGGAGGACGAATTCCCTCGGGATGTAAACTCCTTTTAGGGTTAGGCAAGCAAGGGTGGCTAATATCCACCGGCGTTGAGCCATCCCAGAAAAAGCATCGGCTAACTCCGTGCCAGCAGCCGCGGTAATACGGAGGATGCAAGCGTTGTTCGGAATCACTGGGCTTAAAGCGCATGTAGGCGGTCTGGTAAGTATCTTGTGAAAGCCCCGGGCTCAACCTGGGAACTGCTGGGTATACTGCCAGACTTGAGGCGAACAGGGGTGCTTGGAACTCTAGGTGGAGCGGTGAAATGCGTAGATATCTAGGGGAACGCCAGAGGCGAAAGCGGAGCACTGGGTTCGTCCTGACGCTG…
65400e1143b65f7a7cc5b95f89f2e18f	D_0__Bacteria;D_1__Proteobacteria;D_2__Gammaproteobacteria;D_3__Gammaproteobacteria Incertae Sedis;D_4__Unknown Family;D_5__uncultured	TGGGGAATATTGCACAATGGGCGCAAGCCTGATGCAGCAATGCCGCGTGTGTGAAGAAGGCCTGCGGGTTGTAAAGCACTTTTATTAGGAAAGAAAAACCCGGAATTAATACTTCCGGCATTGACGGTACCTAAAGAATAAGCACCGGCTAACTAAGTGCCAGCAGCCGCGGTAATACTTAGGGTGCGAGCGTTAATCGGAATTACTGGGCGTAAAGCGAGTGTAGGCGGCCATTTAAGTCGGATGTGAAATCCCCGGGCTCAACCTGGGAATTGCATTCGAAACTGGATGGCTAGAGTTTGGTAGAGGTAAGTGGAATTCCGGGTGTAGCGGTGAAATGCGTAGATATCCGGAGGAACATCAGTGGCGAAGGCGGCTTACTGGACCAAAACTGACGCT…
eaad8c631f208a99105620dd3576ea70	D_0__Bacteria;D_1__Bacteroidetes;D_2__Bacteroidia;D_3__Bacteroidales;D_4__Marinilabiliaceae;D_5__Carboxylicivirga	TAAGGAATATTGGGCAATGGACGAAAGTCTGACCCAGCCATGCCGCGTGCAGGATGACAGCCCTACGGGTTGTAAACTGCTTTTATACGGGAAAAAATCTCCGATGTATCGGAGGCTGATGGTACCGTATGAATAAGCATCGGCTAACTCCGTGCCAGCAGCCGCGGTAATACGGAGGATGCAAGCGTTATCCGGATTCATTGGGTTTAAAGGGTGCGTAGGCGGAATAATCAGTCAGGGGTGAGAGTTTGTGGCTCAACCATAAAATTGCCTTTGATACTGTTATTCTTGAGTATATTTGAGGTAGGCGGAATGTGATGTGTAGCGGTGAAATGCATAGATATATCACAGAACACCGATTGCGAAGGCAGCTTACTAAACTATAACTGACGCTGATGC…
0f2a7ba4c7b5145f82c6fbadc951aa8c	D_0__Bacteria;D_1__Bacteroidetes;D_2__Bacteroidia;D_3__Chitinophagales;D_4__Saprospiraceae;D_5__uncultured	TAAGGAATATTGGACAATGGGCGCAAGCCTGATCCAGCCATCCCGCGTGCAGGATGAATGCCCTATGGGTTGTAAACTGCTTTTGTTAGGGAAGAACTCCTCGCATTCATGCGAGGCTGACGGTACCTAAAGAATAAGCACCGGCTAACTCCGTGCCAGCAGCCGCGGTAATACGGAGGGTGCAAGCGTTATCCGGAATCACTGGGTTTAAAGGGTGCGTAGGCGGCGTCGTTAGTCAGAAGTGAAAGCTCACAGCTTAACTGTGAAATTGCTTTTGATACTGCGGCACTTGAATTAGGTTGAGGTTAGCGGAATGTGACATGTGGCGGTGAAATGCATAGATATGTCATAGAACACCAATTGCGAAGGCAGCTGGCTAGGCCTATATTGACGCTGAGG…
6eb2603b1adf94534c228144273b2a17	D_0__Bacteria;D_1__Verrucomicrobia;D_2__Verrucomicrobiae;D_3__Opitutales;D_4__Puniceicoccaceae;D_5__Cerasicoccus;D_6__uncultured organism	TTTCGAATCATTCACAATGGGCGAAAGCCTGATGGTGCAATGCCGCGTGGGGGATGAAGGCCTTCGGGTCGTAAACCCCTGTCACCAAGGAACAAAAAACTGTGATGAGCAGTCTTGAGCTAACTTGGAGAGGAAGAGGTGGCTAACTCCGTGCCAGCAGCCGCGGTAATACGGAGACCTCGAGCGTTACTCGGATTCACTGGGCGTAAAGGGAGCGAAGGCTGACAGGTATGTCAGGTGTGAAATCTAGGGGCTTAACTCCGAAACTGCGCCTGAAACTACTTGTCTAGAGACTCGGAGAGGTAAGCGGAATTCCAGGTGTAGCGGTGAAATGCGTAGATATCTGGAGGAACACCAAAGGCGAAGGCAGCTTACTGGACGAGATCTGACGCTAAAGTT…
240c4e7efa4ddb89d34c0eec077fa119	D_0__Bacteria;D_1__Epsilonbacteraeota;D_2__Campylobacteria;D_3__Campylobacterales;D_4__Sulfurovaceae;D_5__Sulfurovum	TGAGGAATATTGCACAATGGGGGAAACCCTGATGCAGCAACGCCGCGTGGAGGATGACGCATTTCGGTGTGTAAACTCCTTTTATGAGTCAAGAAAATGACGGTAGCTCATGAATAAGCACCGGCTAACTCCGTGCCAGCAGCCGCGGTAATACGGAGGGTGCAAGCGTTACTCGGAATCACTGGGCGTAAAGCGCGCGCAGGCGGCCTTTTAAGTTGGATGTGAAAGCCTATGGCTCAACCATAGAACTGCATCCAAAACTATCAGGCTAGAGTGTGGGAGAGGAAGATGGAATTAGTTGTGTAGGGGTAAAATCCGTAGAGATAACTAGGAATACCAAAAGCGAAGGCAATCTTCTGGAACATTACTGACGCTGAGGCGCGAAAGCGTGGGGAGCAA…
aa097559493dab13ff811cfc9bbe3bae	D_0__Bacteria;D_1__Proteobacteria;D_2__Deltaproteobacteria;D_3__Bradymonadales;D_4__uncultured bacterium;D_5__uncultured bacterium;D_6__uncultured bacterium	TGGGGAATCTTGCGCAATGGGCGAAAGCCTGACGCAGCAACGCCGCGTGTGTGATGAAGGCCCTTGGGTCGTAAAGCACTGTCAGGAGGGAAGAATTTTGACGGTACCTCCAAAGGAAGCACCGGCTAACTCCGTGCCAGCAGCCGCGGTAATACGGAGGGTGCAAGCGTTGTTCGGAATCATTGGGCGTAAAGCGCGCGCAGGTGGTTTGCTAAGTCTGGTGTGAAAGCCCAGGGCTCAACCCTGGAACTGCATTGGAAACTAGTAGACTTGAGTCCGAGAGGGGTCTGTAGAATTCCTGGTGTAGGGGTGAAATCCGTAGAGATCAGGAGGAATACCGGTGGCGAAGGCGACAGACTGGACCGGAACTGACACTGAGGCGCGAAAGTGTGGGGAGCA…
b221cf23e423974036921237c9ad1b24	D_0__Bacteria;D_1__Bacteroidetes;D_2__Bacteroidia;D_3__Flavobacteriales;D_4__Flavobacteriaceae;D_5__NS5 marine group	TAAGGAATATTGGACAATGGAGGCAACTCTGATCCAGCCATGCCGCGTGAAGGAAGAAGGCCCTATGGGTCGTAAACTTCTTTTATACAGGAAGAAATCTTTCCACGTGTGGAAAGTTGACGGTACTGTAAGAATAAGGATCGGCTAACTCCGTGCCAGCAGCCGCGGTAATACGGAGGATCCAAGCGTTATCCGGAATTATTGGGTTTAAAGGGTCCGCAGGCTGTTTGTTAAGTTAGAGGTGAAATCCTACCGCTCAACGGTAGAACTGCCTTTAAAACTGGCAAACTTGAGTTATTGTGAAGTAATTAGAATGTGTAGTGTAGCGGTGAAATGCATAGATATTACACAGAATACCGATTGCGAAAGCAGATTACTAACAATTAACTGACGCTGAGG…
910c5c2fabd4f6790beb99a022c82e78	D_0__Archaea;D_1__Nanoarchaeaeota;D_2__Woesearchaeia	GCGCGAAACCTTTACAATGCACGCAAGTGTGATAAGGGGATCCCCAGTGCTCATGCATTGCATGGGCTTTTGTTAAGTGTAAATAACTTGGCGAATAAGTGGTGGGTAAGACTGGTGCCAGCCGCCGCGGTAACACCAGCGCCACGAGTGGCAACCGCGTTTATTGGGCCTAAAGCGTCCGTAGCCGGTTTAGTAAATCTTTTGTGAAATTGTTCAGCCTAACTGAACAGCGTGCAAGGGACACTGCTAAACTCGAGACCGGGAGGAGTCAGAAGTATTCCAAGGGGAGCGGTAAAATGTGATAATCCTTGGAGGACTACCTGTGGCGAAGGCGTCTGACCAGAACGGATCTGACGGTGAGGGACGAAAGCCAGGGGAGCAAACC
28d37cf4ca3acc19f13f63950f2f79a1	D_0__Bacteria;D_1__Bacteroidetes;D_2__Rhodothermia;D_3__Rhodothermales;D_4__Rhodothermaceae	TGAGGAATATTGCGCAATGGACGAAAGTCTGACGCAGCCACGCCGCGTGCAGGAAGACACCCCTCTGGGGCGTAAACTGCTTTTATATGGGAAGAACACCCTACTCGGTAGGGTCTGACGGTACCATACGAATAAGGACCGGCTAACTCCGTGCCAGCAGCCGCGGTAATACGGAGGGTCCAAGCGTTGTCCGGAATCACTGGGTGTAAAGGGTGCGCAGGCGGGCTTGTAAGTCAGAGGTGAAATCCCACGGCCTAACCGTGGAACTGCCTTTGATACTGCAAGTCTTGAGTCCTGGAGGGGCTATCGGAATTCGTGGTGTAGCGGTGAAATGCGTAGATATCACGAGGAACACCGGAGGTGTAGACGGATAGCTGGACAGGTACTGACGCTGAGGCA…
c72ea85ea301f3355791eb1f3b1ef981	D_0__Bacteria;D_1__Planctomycetes;D_2__Planctomycetacia;D_3__Pirellulales;D_4__Pirellulaceae;D_5__Blastopirellula;D_6__uncultured bacterium	TCGAGAATCTTCCGCAATGGACGCAAGTCTGACGGAGCGACGCCGCGTGCGGGATGAAGGCCTTCGGGTTGTAAACCGCTGTCAGTGGGGTGGAAATGCATGAGGGTTATCTCTCATGTTTGACCTAACCGCAGAGGAAGTCCGGGCTAAGTACGTGCCAGCAGCCGCGGTAATACGTACCGGACGAACGTTATTCGGAATCACTGGGCTTAAAGAGTGCGTAGGCGGTCTAACAGGTGGGGTGTGAAATCCCGCGGCTCAACCGCGGAACTGCGCTCCAAACCGTTAGGCTTGAGGGAGACAGGGGTGAGCGGAACTGATGGTGGAGCGGTGAAATGCGTTGATATCATCAGGAACACCGGTGGCGAAGGCGGCTCACTGGGTCTCTTCTGACGCTGA…
dc4601143baeb3d0590e4921281d0bbc	D_0__Bacteria;D_1__Bacteroidetes;D_2__Bacteroidia;D_3__Flavobacteriales;D_4__Flavobacteriaceae	TGAGGAATATTGGGCAATGGACGAGAGTCTGACCCAGCCATGCCGCGTGCAGGAAGACGGCCCTATGGGTTGTAAACTGCTTTTATACAGGAAGAAACCCGTCTACGTGTAGACGGCTGACGGTACTGTACGAATAAGCACCGGCTAACTCCGTGCCAGCAGCCGCGGTAATACGGAGGGTGCAAGCGTTATCCGGAATCATTGGGTTTAAAGGGTCCGTAGGCGGGCGATTAAGTCAGAGGTGAAATCCCACAGCTTAACTGTGGAACTGCCTTTGATACTGGTCGTCTTGAGTTACAGTGAAGTAGATAGAATATGTAGTGTAGCGGTGAAATGCATAGATATTACATAGAATACCGATTGCGAAGGCAGTCTACTAACTGTATACTGACGCTAATG…
21f7ff5eddd2438064ea436bffe818e8	D_0__Archaea;D_1__Nanoarchaeaeota;D_2__Woesearchaeia;D_3__archaeon GW2011_AR13;D_4__archaeon GW2011_AR13;D_5__archaeon GW2011_AR13;D_6__archaeon GW2011_AR13	TTAGGAATATTTTGCAATGCGCGCAAGCGTGACAAATTGAGCCAGAGTGTTTTCCTTTTTGGAAAGCTTTTATGCACTGTAAAAAGGTGCAGGAATAAGGACTGGGTAAGACTAGTGCCAGCCGCCGCGGTAATACTAGCGGTCCAAGTCGCAGCCATTTTTATTGGGTCTAAAACATCCGTGGCTTGCTTGATAAGTTTCTCGTGAAATTTTGTATCTTAAATACGATGCGTGCAAGAAGTACTGTCAAGCTAGAGACTGGGAGACGTAGGAAGTACATTTGGAGTAGCGGTTAAATGTTTTGATCCCGAATGGATTAACAATTAGCGAAGGCATCCTACGAGAACAGTTCTGACAGTCAGGGATGAAGGCTAGGGTCGCAAATG
1c807305298363d08987416dc713ec66	D_0__Bacteria;D_1__Synergistetes;D_2__Synergistia;D_3__Synergistales;D_4__Synergistaceae;D_5__Aminobacterium	TGGGGAATATTGGGCAATGGGCGAAAGCCTGACCCAGCGACGCCGCGTGAGGGATGACGGCCTTAGGGTTGTAAACCTCTGTTGTATGGGAAGAAGGAAGTGACGGTACCATACGAGGAAGCTCCGGCTAACTACGTGCCAGCAGCCGCGGTAATACGTAGGGAGCGAGCGTTGTCCGGAATTACTGGGCGTAAAGGGCACGCAGGCGGTCATAAAAGTCAGCTGTTAAATGTATGGGCTTAACCGATGCATGCGGTTGAAACCGTAAGACTGGAGTACTGGAGAGGTAAGCGGAATTCCCGGTGTAGCGGTGAAATTCGTAGATATCGGGAGGAACACCAGTGGCGAAGGCGGCCACCTGGACGGTGACTGACGCTCAGACCCGAAAGCGTGGGGAGC…
002debf9610bf01ae0639f4838f5b6c8	D_0__Bacteria;D_1__Proteobacteria;D_2__Alphaproteobacteria;D_3__Rhodobacterales;D_4__Rhodobacteraceae	TGGGGAATCTTAGACAATGGGCGCAAGCCTGATCTAGCGATGCCGCGTGAGTGATGAAGGCCTTAGGGTCGTAAAGCTCTTTCGCCAGAGATGATAATGACAGTATCTGGTAAAGAAACCCCGGCTAACTCCGTGCCAGCAGCCGCGGTAATACGGAGGGGGTTAGCGTTGTTCGGAATTACTGGGCGTAAAGCGTACGTAGGCGGATCAGAAAGTTAGGGGTGAAATCCCGGGGCTCAACCTCGGAACTGCCTCTAAAACTCCTGGTCTTGAGTTCGAGAGAGGTGAGTGGAATTCCAAGTGTAGAGGTGAAATTCGTAGATATTTGGAGGAACACCAGTGGCGAAGGCGGCTCACTGGCTCGATACTGACGCTGAGGTACGAAAGTGTGGGGAGCAA…
5a8c6f837c46a0e59cd2865d0a0e5c35	D_0__Bacteria;D_1__Firmicutes;D_2__Clostridia;D_3__Clostridiales;D_4__Clostridiales vadinBB60 group;D_5__uncultured bacterium;D_6__uncultured bacterium	CAAGGAATATTGTACAATGGGGGAAACCCTGATACAGCAACACCGCGTGTAGGAAGAAGGCCTTCGGGTTGTAAACTACTGTTTTAGAGGAAGAAACAAATGACGGTACTCTAAGAGGAAGCCCCGGCAAACTACGTGCCAGCAGCCGCGGTAATACGTAGGGGGCAAGCGTTGTCCGGAATCACTGGGCGTAAAGGGCGCGTAGGCGGTTTATTAAGTTGCATGTGAAATCCCAGGGCTTAACTCTGGACCTGCATGCAAAACTGGTAGACTTGAGTGTGGTAGAGGTAAGTGGAATTCCTAGTGTAGCGGTGGAATGCGTAGATATTAGGAGGAACACCAGTGGCGAAGGCGACTTACTGGGCCATAACTGACGCTGAGGCGCGAAAGCGTGGGGAG…
dc580f1bfb6be4c2063d6c1edfaa24ce	D_0__Bacteria;D_1__Proteobacteria;D_2__Deltaproteobacteria;D_3__Desulfobacterales;D_4__Desulfobulbaceae;D_5__uncultured	TGAGGAATATTGCACAATGGAGGCAACTCTGATGCAGCAACGCCGCGTGTACGATGAATCAGTTTATCTGTGTAAAGTACTGTTAACCGGGACGAAGAGGCATATAGGCTATGCCGATGACGGTACCGGTTGAGGAAGCACCGGCTAACTCCGTGCCAGCAGCCGCGGTAATACGGAGGGCGCAAGCGTTGTTCGGAATTACTGGGCGTAAAGGGCGCGTAGGCGGCCTGATAAGTCAGATGTGAAAGTCCACGGCTCAACCGTGGAAGTGCATTTGAAACTGTCAGGCTTGAGTATCGGAGGGGAGTGTGGAATTCCCGGTGTAGAGGTGAAATTCGTAGAGATCGGGAGGAACACCGGTGGCGAAGGCGACACTCTGGACGAATACTGACGCTGAGG…
69b10f787bbc9de9465b9a6e08bc3287	D_0__Bacteria;D_1__Proteobacteria;D_2__Alphaproteobacteria;D_3__Rhizobiales;D_4__Methyloligellaceae;D_5__uncultured;D_6__uncultured bacterium	TGGGGAATCTTGCACAATGGGCGAAAGCCTGATGCAGCCATGCCGCGTGAGTGAAGAAGGCCTTAGGGTTGTAAAACTCTTTCAGCGGGGAAGATAATGACGGTACCCGCAGAAGAAGCCCCGGCTAACTCCGTGCCAGCAGCCGCGGTAATACGGAGGGGGCTAGCGTTGTTCGGATTTACTGGGCGTAAAGCGCACGTAGGCGGATTGTTAAGTCGGGGGTGAAAGCCCGAGGCTCAACCTCGGAACTGCCCTCGATACTGGCAATCTTGAGTCCGGGAGAGGTGAGTGGAATTCCTAGTGTAGAGGTGAAATTCGTAGATATTAGGAAGAACACCAGTGGCGAAGGCGGCTCACTGGCCCGGTACTGACGCTGAGGAGCGAAAGCGTGGGGAGCAA…
d09f11aa94b68a9fe72c5ccaf2820625	D_0__Bacteria;D_1__Planctomycetes;D_2__Planctomycetacia;D_3__Pirellulales;D_4__Pirellulaceae;D_5__Pir4 lineage;D_6__uncultured organism	TCGAGAATCTTCGGCAATGGACGCAAGTCCGACCGAGCGACGCCGCGTGCGGGATGAAGGCCTTCGGGTTGTAAACCGCTGTCAGTTGGGAGGAAATCCTAGGGGGTTATCCCTTTAGGTTGACCTATCTTCAGAGGAAGTGCGGGCTAAGTTCGTGCCAGCAGCCGCGGTAATACGAACCGCACGAACGTTATTCGGAATCACTGGGCTTAAAGGGTGCGTAGGCGGCTATGCAAGTTGGGTGTGAAATCCCTCGGCTCAACCGAGGAATTGCGCTCAAAACTGCATGGCTTGAGGGAGATAGAGGTGAGCGGAACTTGCGGTGGAGCGGTGAAATGCGTTGATATCGCAAGGAACACCAGTTGCGAAAGCGGCTCACTGGGTCTCTTCTGACGCTGA…
ccf5b3027db749ea9df88a3628c1b742	D_0__Archaea;D_1__Nanoarchaeaeota;D_2__Woesearchaeia	GCGCGAAACCTTTACAATGCACGCAAGTGTGATAAGGGAACCCAAAGTGCTTAGTTTTACTAGGCTTTTGCTAAATGTAAATAATTTAGAGAATAAGCGGTGGGAAAGACTGGTGCCAGCCGCCGCGGTAACACCAGCGCCGCAAGTGGCGATCCTTTTTATTTGGCCTAAAGCGTCCGTAGCTGGTTAAGTAAATCTTTTGTGAAATTGTTTGGCTCAACTAAACAACGTGCAGGAGAGACTGCTTAACTAGGGACCGGGAGGAGTTAGAGGTATGCTGGGGGGAGCGGTAAAATGCTATAATCCCCGGTAGATCACCTGTGGCGAAGGCGTCTAACTAGAACGGGTCCGGCAGTGAGGGACGAAAGCCAGGGGAGCAAACC
eccbea9982215634d616aa5ccf1e5816	D_0__Bacteria;D_1__Proteobacteria;D_2__Gammaproteobacteria	TGGGGAATATTGGACAATGGGGGCAACCCTGATCCAGCAATGCCGCGTGTGTGAAGAAGGCCTGCGGGTTGTAAAGCACTTTCAGTGGGGAAGATGGTGTGTGTGTAATGAGCGCACATTGACGTTACCCATAGAAGAAGCACCGGCTAACTCCGTGCCAGCAGCCGCGGTAATACGGAGGGTGCGAGCGTTAATCGGAATTACTGGGCGTAAAGCGCGCGTAGGCGGCTTGGTCAGTCGGATGTGAAAGCCCCGGGCTCAACCTGGGAATTGCATTCGATACTGCCGAACTAGAGTATGGGAGAGGGAAGTGGAATTTCCGGTGTAGCGGTGAAATGCGTAGATATCGGAAGGAACACCAGTGGCGAAGGCGACTTCCTGGCCCAATACTGACGCTGA…
6b91387d28da423f621ab3b820e51f88	D_0__Bacteria	TAAGGAATAATAGGCAATGAGTATTTAGCTTGACCATTCGACACCTAGTGAGTGAATGACTGTTTATGGGCTGTAAAGCTATTTCGGCATTGAAATTAATGATATACAATGAAGTAAGAAGTCCTGACTAATTCTGTGCCAGCAGTCGCGGTAACACAGGGGGGGCTAGCGTTATTCTGCGTTACTTGGCGTAAAGGATATGTAGGTGCTTTCATAGAATTAAATGAGGAAAGGTTGGATCAAATAAATTTAGAATTCCTTTTAATAATCGAAAGTTGAGTTAAAAACAAGGTTTTTAGAATTTTTAGTGTAGATGTAAAATGCTGTAATACTAAAAAGAATGTTTGTGATGAAGATGTTTTTCTAGTTTTTAACTGACGCTGTGGTATGAAGGTGCAG…
6dd99d0ea9c11d5595fc681e47e85407	D_0__Bacteria;D_1__Bacteroidetes;D_2__Bacteroidia;D_3__Sphingobacteriales;D_4__Lentimicrobiaceae;D_5__uncultured sediment bacterium;D_6__uncultured sediment bacterium	TAAGGAATATTGGGCAATGGACGCAAGTCTGACCCAGCCATGCCGCGTGCAGGATGACGGCCCTATGGGTTGTAAACTGCTTTTATATGGGAAGAAACTTCCGGACGTGTCCGGAACTGACGGTACCATACGAATAAGCACCGGCTAACTCCGTGCCAGCAGCCGCGGTAATACGGAGGGTGCAAGCGTTATCCGGATTTATTGGGTTTAAAGGGTGCGCAGGCGGAATGATTAGTCAGTGGTGAAATCCTACAGCTCAACTGTAGACCTGCCATTGATACTGTCATTCTTGAGTACAGCGGAAGTGGGCGGAATGTATCATGTAGCGGTGAAATGCATAGATATGATACAGAACTCCGATAGCGTAAGCAGCTCACTATACTGTAACTGACGCTCAGG…
092acfdebe100067062c3fd9f91b1ea8	D_0__Bacteria;D_1__Planctomycetes;D_2__Planctomycetacia;D_3__Pirellulales;D_4__Pirellulaceae;D_5__Blastopirellula;D_6__uncultured bacterium	TCGAGAATCTTCCGCAATGGACGAAAGTCTGACGGAGCGACGCCGCGTGCGGGATGAAGGCCTTCGGGTTGTAAACCGCTGTCAGTGGGGTGGAAATCTTTGGGGGTCATCCCCCTTAGTTGACCTAACCGCAGAGGAAGTCCGGGCTAAGTACGTGCCAGCAGCCGCGGTAATACGTACCGGACAAACGTTATTCGGATTTACTGGGCTTAAAGAGTGCGTAGGCGGCTTTGTAGGTGGGGTGTGAAATCCCTCGGCTCAACCGAGGAATAGCGCTCCAAACCACTTGGCTTGAGGGAGATAGGGGTGAGCGGAACTGATGGTGGAGCGGTGAAATGCATTGATATCATCAGGAACGCCGGTGGCGAAGGCGGCTCACTGGATCTCTTCTGACGCTGA…
2c41eb923a913f58320368bf791e18ff	D_0__Bacteria;D_1__Bacteroidetes;D_2__Bacteroidia;D_3__Chitinophagales;D_4__Saprospiraceae;D_5__uncultured;D_6__uncultured Bacteroidetes bacterium	TAAGGAATATTGGACAATGGGCGCAAGCCTGATCCAGCCATCCCGCGCGCAGGAAGACGGTTCTATGAATTGTAAACTGCTTTTGTTAGGGAAGAACTCCCCGGACTTGTCCGGGGCTGACGGTACCTAAAGAATAAGCACCAGCTAACTCCGTGCCAGCAGCCGCGGTAATACGGAGGGTGCAAGCGTTATCCGGAATTACTGGGTTTAAAGGGTGCGTAGGCGGCGGCATAAGTCAGAAGTGAAAGTTGGCAGCTTAACTGCAAAATTGCTTTTGATACTGTGTTGCTTGAATCACGTTGAGGCTGGCGGGATGTGGCATGTAGCGGTGAAATGCTTAGATATGCCATAGAACACCAATTGCGAAGGCAGCTGGCTAGACGTGTATTGACGCTGAGG…
1ffcd14d0e872dd7d22876d3ea379fd8	D_0__Bacteria;D_1__Proteobacteria;D_2__Deltaproteobacteria;D_3__Myxococcales	TGGGGAATCTTGCGCAATGGGCGAAAGCCTGACGCAGCGACGCCGCGTGAGTGATGAAGGCCTTAGGGTTGTAAAGCTCTGTGGAGAGGGACGAATAAGGTACGGTTAATACCCGTATTGATGACGGTACCTCCTTAGCAAGCACCGGCTAACTCTGTGCCAGCAGCCGCGGTAAGACAGAGGGTGCAAACGTTGTTCGGAATTACTGGGCGTAAAGCGCGTGTAGGCGGCTAGGCAAGTCGAGTGTGAAATCCCAGGGCTCAACCCTGGAACTGCACCCGAAACTGCTTAGCTAGAGTCCCGGAGAGGGTGGCGGAATTTCCGGTGTAGAGGTGAAATTCGTAGATATCGGAAGGAACACCAGTGGCGAAGGCGGCCACCTGGACGGTGACTGACGCT…
44fc8fe0cc43fd4467302afe52869045	D_0__Bacteria;D_1__Bacteroidetes;D_2__Bacteroidia;D_3__Chitinophagales;D_4__Saprospiraceae;D_5__Lewinella;D_6__uncultured Bacteroidetes bacterium	TAAGGAATATTGGACAATGGGCGGAAGCCTGATCCAGCCATCCCGCGTGCAGGATGACAGCGCTCTGCGTTGTAAACTGCTTTTATATACCAAGAAACGCCTTTACGTGTAAGGGTTTGACGGTAGTATATGAATAAGCACCGGCTAACTCCGTGCCAGCAGCCGCGGTAATACGGAGGGTGCAAGCGTTATCCGGAATTACTGGGTTTAAAGGGTGCGTAGGCGGTTTAATAAGTCAGTGGTGAAAAGTCTGGGCTCAACCGAGGCCTTGCCATTGAAACTGTTAGACTTGAAATAAGTTAAGGTAGGCGGAATGTGACATGTAGCGGTGAAATGCATAGATATGTCATAGAACACCAATTGCGAAGGCAGCTTACTGGACTTTATTTGACGCTGAGG…
b9635c06fb0f7be87d5ce2728ef1275d	D_0__Bacteria;D_1__Proteobacteria;D_2__Deltaproteobacteria;D_3__SAR324 clade(Marine group B)	TGGGGAATATTGCGCAATGGGCGAAAGCCTGACGCAGCAATGCCGCGTGAGTGAAGAAGGATTTCGGTTCGTAAAGCTCTTTATCTCTGTGAAGATAATGACGGTAGCAGAGGAATAAGCACCGGCTAACTACGTGCCAGCAGCCGCGGTAATACGTAGGGTGCGAGCGTTGTTCGGAATTACTGGGCGTAAAGGGTGTGTAGGCGGAATGGTCAGCTAGAGGTGAAAGCCCGGGGCTCAACCCCGGAACTGCTTTTAGAACTGCCAATCTAGAGAGGGTCAGAGGTCAGCGGAATTCCTAGTGTAGAGGTGAAATTCGTAGATATTAGGAGGAACACCGGCGGCGAAAGCGGCTGGCTGGGGCCACTCTGACGCTGAGGCACGAAAGCGTGGGGAGCA…
c7844ade8729f5ec3195651dca3f4ca2	D_0__Bacteria;D_1__Chloroflexi;D_2__KD4-96;D_3__uncultured bacterium;D_4__uncultured bacterium;D_5__uncultured bacterium;D_6__uncultured bacterium	TCGGGAATTTTGCTCAATGGGGGAAACCCTGAAGCAGCAACGCCGCGTGAGGGATGACGGCCTTCGGGTTGTAAACCTCTTTTGTCAGGGACGATAATGACGGTACCTGAAGAATAAGCCACGGCTAACTACGTGCCAGCAGCCGCGGTAATACGTAGGTGGCAAGCGTTGTCCGGATTTACTGGGCGTAAAGAGCGCGCAGGCGGCCAGGTCAGTCGAATGTGAAAGCCCCCGGCTCAACTGGGGAAGGTCGTTCGATACTGCTTGGCTCGAAGATAGGAGAGGGAAGTGGAATTTCAGGTGTAGTGGTGAAATGCGTAGATATCTGAAGGAACACCAGTGGCGAAGGCGACTTTCTGGCCTATTCTTGACGCTGAGGCGCGAAAGCTAGGGGAGCGA…
3ea1b85dd7fd4763d4e7a78ebbff4d4a	D_0__Bacteria;D_1__Bacteroidetes;D_2__Bacteroidia;D_3__Cytophagales;D_4__Cyclobacteriaceae;D_5__uncultured	TGGGGAATATTGGACAATGGGGGAAACCCTGATCCAGCAATGCCGCGTGTGTGAAGAAGGCCTTAGGGTTGTAAAGCACTTTAGGCTAGGAAGAAGGTGTTTAGTTTAAGAGATGAAACACTTGACGGTACTAGCAGAATAAGCACCGGCTAACTCCGTGCCAGCAGCCGCGGTGATACGGAGGGTGCAGCGTTGTCCGGATTTATTGGGTTTAAAGGGTGCGTAGGCGGTCCGTTAAGTCAGTGGTGAAATCCAGCAGCTCAACTGCTGAACTGCCATTGATACTGGCGGACTTGAGTACGGACGAGGTAGGCGGAATTTATGGTGTAGCGGTGAAATGCATAGATACCATAAAGAACACCGATAGCGAAGGCAGCTTACTAGACCGTAACTGACGCT…
d21fdd7ad98999a6b429a4c0ced67954	D_0__Bacteria;D_1__Bacteroidetes;D_2__Bacteroidia;D_3__Flavobacteriales;D_4__Flavobacteriaceae	TGAGGAATATTGGACAATGGAGGCAACTCTGATCCAGCCATGCCGCGTGCAGGAAGACTGCCCTATGGGTTGTAAACTGCTTTTATACGGGAAGAAACACTGCTACGTGTAGCAGCTTGACGGTACCGTAAGAATAAGGATCGGCTAACTCCGTGCCAGCAGCCGCGGTAATACGGAGGATCCAAGCGTTATCCGGAATCATTGGGTTTAAAGGGTCCGTAGGTGGATAATTAAGTCAGAGGTGAAAGTTTGCAGCTCAACTGTAAAATTGCCTTTGATACTGGTTATCTTGAATCATTATGAAGCAGTTAGAATATGTAGTGTAGCGGTGAAATGCATAGATATTACATAGAGTACCAATTGCGAAGGCAGATTACTAATAATCGATTGACACTGATG…
57e6073b1459b6e9b64d09c4b4885ff5	D_0__Bacteria;D_1__Bacteroidetes;D_2__Bacteroidia;D_3__Bacteroidales;D_4__Marinifilaceae;D_5__Marinifilum	TGAGGAATATTGGTCAATGGGCGAAAGCCTGAACCAGCCATGTCGCGTGCAGGATGACGGCCCTATGGGTTGTAAACTGCTTTTTTACAGGAATAATTGTCGCTACGTGTAGTGATTTGAATGTACTGTATGAATAAGGATCGGCTAACTCCGTGCCAGCAGCCGCGGTAATACGGAGGATTCGAGCGTTATCCGGATTTATTGGGTTTAAAGGGTCCGTAGGCGGTTCTTTAAGTCAGTGGTGAAATCCCAGAGCTCAACTCTGGAACTGCCATTGAAACTGAAGAACTTGAATATGGTTGAGGTAGGCGGAATACGTTATGTAGCGGTGAAATGCATAGATATAACGTAGAACACCAATTGCGAAGGCAGCTTACTAAACCATTATTGACGCTGATG…
e41a24ef541e24f48349551d4a7a24ef	D_0__Bacteria;D_1__Proteobacteria;D_2__Deltaproteobacteria;D_3__Desulfobacterales;D_4__Desulfobulbaceae;D_5__uncultured	TGGGGAATATTGGACAATGGGCGAAAGCCTGATCCAGCCACGCCGCGTGAAGGATGAAGGATTTCGGTTCGTAAACTTCTGTTGGGAGAGACGAAAGGGCGTTGAAGAGGCGCAGATGACGGTATCTCCTTAGCAAGCACCGGCTAACTCCGTGCCAGCAGCCGCGGTAATACGGAGGGTGCAAGCGTTGTTCGGAATTACTGGGCGTAAAGCGCGCGTAGGCGGTCTGTTATGTCAGGTGTGAAAGTCCATGGCTCAACCATGGAAGTGCATTTGAAACTGATAGACTTGAGTACTGGAGGGGGTAGTGGAATTCCCGGTGTAGAGGTGAAATTCGTAGATATCGGGAGGAATACCGGTGGCGAAGGCGACTACCTGGCCAGATACTGACGCTGAGGT…
2e761ac5509860d16e279fbddf8578a6	D_0__Bacteria;D_1__Proteobacteria;D_2__Gammaproteobacteria;D_3__Gammaproteobacteria Incertae Sedis;D_4__Unknown Family;D_5__uncultured	TGGGGAATATTGCACAATGGGCGCAAGCCTGATGCAGCAATGCCGCGTGTGTGAAGAAGGCCTGCGGGTTGTAAAGCACTTTTATTAGGAAAGAAAAACACGGAGTTAATAACTCCGTACTTGACGGTACCTAAAGAATAAGCACCGGCTAACTCAGTGCCAGCAGCCGCGGTAATACTGAGGGTGCAAGCGTTAATCGGAATTACTGGGCGTAAAGCGAGTGTAGGCGGTTACTTAAGTCGGATGTGAAATCCCCGGGCTCAACCTGGGAATTGCATTCGATACTGGGTAGCTAGAGTTTGGTAGAGGTAAGTGGAATTCCGGGTGTAGCGGTGAAATGCGTAGATATCCGGAGGAACATCAGTGGCGAAGGCGGCTTACTGGACCAAAACTGACGCT…
1f527b7864296d54a16791bcdfabe53c	D_0__Bacteria;D_1__Bacteroidetes;D_2__Bacteroidia;D_3__Bacteroidales;D_4__Salinivirgaceae	TGAGGAATATTGGTCAATGGACGCAAGTCTGAACCAGCCAAGCCGCGTGAAGGAAGACTGCCCTATGGGTTGTAAACTTCTTTTCTAGAGGAATAATAGCAATAACGTGTTATTGTATGCATGTACTTTAGGAATAAGCATCGGCTAACTCCGTGCCAGCAGCCGCGGTAATACGGAGGATGCAGGCGTTATCCGGATTTATTAGGTTTAAAGGGTGTTTAGGTTGTCCGATAAGTCAGTGGCGAAAGTCAATTGCTCAACAATTGAATTGCCTTTGATACTGTCAGACTTGAGTTTGGTTGAGGTAGGCGGAATGTGTAGTGTAGCGGTGAAATGCATAGATATTACACAGAACTCCGATTGCGAAGGCAGCTTACTAAGCCATTACTGACGCTGAAG…
3b68b81f41d0ee19b6c36b0fb835cbfb	D_0__Bacteria;D_1__Bacteroidetes;D_2__Bacteroidia;D_3__Flavobacteriales;D_4__Flavobacteriaceae;D_5__Eudoraea	TGAGGAATATTGGACAATGGGCGTAAGCCTGATCCAGCCATGCCGCGTGCAGGAAGACGGCCCTATGGGTTGTAAACTGCTTTTATACGGGAAGAATAAGGGACACGTGTGTCCTGGTGACGGTACCGTAAGAATAAGGACCGGCTAACTCCGTGCCAGCAGCCGCGGTAATACGGAGGGTCCGAGCGTTATCCGGAATTATTGGGTTTAAAGGGTCCGCAGGCGGGCAATTAAGTCAGGGGTGAAATGGTACGGCTCAACCGTAGCACTGCCCTTGATACTGGTTGTCTTGAGTCATAGTGAAGTGGCCGGAATATGTCGTGTAGCGGTGAAATGCGTAGATATCGGAAGGAACACCAGTGGCGAAGGCGACTTCCTGGGCCAATACTGACGCTGAGG…
23a2eea8b8a02a066cfdb5640d3de979	D_0__Bacteria;D_1__Bacteroidetes;D_2__Bacteroidia;D_3__Chitinophagales;D_4__Saprospiraceae;D_5__uncultured	TAAGGAATATTGGACAATGGGGGCAACCCTGATCCAGCCATCCCGCGTGCAGGAAGACGGCCCTATGGGTTGTAAACTGCTTTTATTAGGGAAGAAAATGTCGCATTTATGTGACACTGACGGTACCTAAAGAATAAGCACCGGCTAACTCCGTGCCAGCAGCCGCGGTAATACGGAGGGTGCAAGCGTTATCCGGAATTACTGGGTTTAAAGGGTGCGTAGGCGGAATTATAAGTCAGAGGTGAAAGCTCGCAGCTCAACTGCGGAATTGCCTTTGATACTGTAAATCTTGAATTAGGTTGAGGTTAGCGGAATGTGACATGTAGCGGTGAAATGCATAGATATGTCATAGAACACCAATTGCGAAGGCAGCTAGCTAGGCCTACATTGACGCTGAGG…
a3e6ae6e4dfbc2d19bd52e2ca2c78620	D_0__Bacteria;D_1__Bacteroidetes;D_2__Bacteroidia;D_3__Flavobacteriales;D_4__Cryomorphaceae;D_5__uncultured;D_6__uncultured Cryomorphaceae bacterium	TGAGGAATATTGGTCAATGGACGAAAGTCTGAACCAGCCATGCCGCGTGCAGGAAGACGGCCCTACGGGTTGTAAACTGCTTTTGTATAGGAATAAACCCCGGAACGTGTTCTGGGCTGAAGGTACTATACGAATAAGCACCGGCTAACTCCGTGCCAGCAGCCGCGGTAATACGGAGGGTGCAAGCGTTATCCGGATTTATTGGGTTTAAAGGGTGCGTAGGCGGGACGTTAAGTCAGTGGTGAAATCTCTCAGCTCAACTGAGAAACTGCCATTGAAACTGACGTTCTTGAATTTAGTTGAAGTTGGCGGAATGAGGCATGTAGCGGTGAAATGCATAGATATGCCTCAGAACACCGATCGCGAAGGCAGCTAACTAAACTAATATTGACGCTGAGG…
bbd7e35b912052c09209e15e274d65db	D_0__Bacteria;D_1__Proteobacteria;D_2__Gammaproteobacteria;D_3__Alteromonadales;D_4__Psychromonadaceae;D_5__Psychromonas	TGGGGAATATTGCGCAATGGACGAAAGTCTGACGCAGCAACGCCGCGTGAGGGAACGAAGGCCTTTGGGTTGTAAACCTCTTTCAGCAGGGACGAAGCGAAAGTGACGGTACCTGCAGAAGAAGCACCGGCTAACTACGTGCCAGCAGCCGCGGTAATACGTAGGGTGCAAGCGTTAATCGGAATTACTGGGCGTAAAGCGCGCGTAGGTGGTTAATTAAGTCAGATGTGAAAGCCCAGGGCTCAACCTTGGAACTGCATTTGAAACTGGTTGACTAGAGTTTTGTAGAGGGTGGTAGAATTTCAGGTGTAGCGGTGAAATGCGTAGAGATCTGAAGGAATACCAGTGGCGAAGGCGGCCACCTGGACAAAGACTGACACTGAGGCGCGAAGGCGTGGG…
a600b0eb71be9d5670d07e3589ac3058	D_0__Bacteria;D_1__Patescibacteria;D_2__Gracilibacteria;D_3__Absconditabacteriales (SR1);D_4__uncultured bacterium;D_5__uncultured bacterium;D_6__uncultured bacterium	TGGGGAATATTGCACAATGGACGAAAGTCTGATGCAGCCACCCCGCGTGGAGGATGAAGCATTACGGTGCGTAAACTCCTTTTCTGGAGGAAGACGACTGACGGTACTCCAGGAATAAGCGACGGCTAACTACGTGCCAGCAGCCGCGGTAATACGTAGGTCGCAAGCGTTATCCGGATTCACTGGGCGTAAAGCGTCCGCAGCCGGTTTGGTAAGTCTGATTTTAAATATCGCAGCTCAACTGCGAAAAGGGATCAGATACTGCTTAACTAGAGAAAGATAGAGGTTAGTAGAATTTCCAGTGGAGGAGTGAAATCCGTTGATATTGGAAGGAATACCGAAAGCGAAGGCAGCTAACTATATCTTTTCTGACGGTCAGGGACGAAAGTCTGGGTAGCA…
6710ba671988b619374839bed126b6bc	D_0__Bacteria;D_1__Proteobacteria;D_2__Deltaproteobacteria;D_3__Desulfobacterales;D_4__Desulfobulbaceae	TGGGGAATATTGCACAATGGAGGAAACTCTGATGCAGCAACGCCGCGTGGAGGATGACGCATTTCGGTGTGTAAACTCCTTTTATATGGGAAGATAATGACGGTACCATATGAATAAGCACCGGCTAACTCCGTGCCAGCAGCCGCGGTAATACGGAGGGTGCAAGCGTTGTTCGGAATTACTGGGCGTAAAGCGCGCGTAGGCGGCTATTTAAGTCAGATGTGAAAGCCCATGGCTCAACCATGGACGTGCATTTGATACTGGATAGCTTGAGTACTGGAGGGGATGGTGGAATTCCCGGTGTAGAGGTGAAATTCGTAGATATCGGGAGGAATACCGGTGGCGAAGGCGACCATCTGGCCAGATACTGACGCTGAGGTGCGAAAGCGTGGGGAGCAA…
29b9d4f332b4266e5a23f42de40bf30e	D_0__Bacteria;D_1__Proteobacteria;D_2__Deltaproteobacteria;D_3__Myxococcales;D_4__bacteriap25	TGGGGAATACTGGACAATGGGCGAAAGCCTGATCCAGCAACGCCGCGTGAGTGATGAAGGCCCTCGGGTTGTAAAGCTCTGTCAGAGGGAACGAATAAGGGTGACCTAATACGTCATCTGGTGACGGTACCCACAAAGGAAGCACCGGCTAACTCTGTGCCAGCAGCCGCGGTAAGACAGAGGGTGCAAGCGTTGTTCGGAATTACTGGGCGTAAAGGGCGTGTAGGCGGCTTGGTAAGTCTGAAGTGAAATCCGTCGGCTCAACCGACGAACTGCTTCAGATACTGCCTCGCTTGAGTACGGGAGAGGAAAGCGGAATTCCCAGTGTAGAGGTGAAATTCGTAGATATTGGGAAGAACACCGGTGGCGAAGGCGGCTTTCTGGACCGATACTGACGCT…
a63f8d7c6f265aeed51ab369ffcb3bd0	D_0__Bacteria;D_1__Planctomycetes;D_2__Planctomycetacia;D_3__Planctomycetales;D_4__Rubinisphaeraceae;D_5__uncultured;D_6__uncultured Planctomycetaceae bacterium	TCGAGAATCTTCCGCAATGGGCGAAAGCCTGACGGAGCGACGCCGCGTGCGGGATGAAGGCCCTTGGGTTGTAAACCGCTGTCAGAGGGGATGAAATCACGGTTGGCTATCCTTCCGTGTTGACAGAGCCTCAAAGGAAGCACGGGCTAAGTACGTGCCAGCAGCCGCGGTAACACGTACTGTGCGAACGTTATTCGGAATCACTGGGCTTAAAGGGTGCGTAGGCGGTTTATCAAGTCAGATGTGAAATGCCTGAGCTCAACTGAGGCACTGCGTTTGAAACTGATAGACTTGAGTATTCCAGGGGTATGCGGAACTGCCAGTGGAGCGGTGAAATGCGTTGATATTGGCAGGAACACCAGTGGCGAAGGCGGCATACTGGGGGATTACTGACGCTGA…
61dbe05dd79ff05d75df2099eb054d2f	D_0__Bacteria;D_1__Bacteroidetes;D_2__Bacteroidia;D_3__Chitinophagales;D_4__Saprospiraceae;D_5__uncultured;D_6__uncultured Flavobacterium sp.	TAAGGAATATTGGACAATGGGGGCAACCCTGATCCAGCCATCCCGCGTGTAGGAAGACTGCCCTATGGGTTGTAAACTACTTTTATCAGGGAAGAACAGTTGGCATTTATGCTGACATGACGGTACCTGAAGAATAAGCACCGGCTAACTCCGTGCCAGCAGCCGCGGTAATACGGAGGGTGCAAGCGTTATCCGGAATTACTGGGTTTAAAGGGTGCGTAGGCGGAATTATAAGTCAGAGGTGAAAGCTCGCAGCTCAACTGCGGAATTGCCTTTGATACTGTAAATCTTGAATTAGGTTGAGGTTAGCGGAATGTGACATGTAGCGGTGAAATGCATAGATATGTCATAGAACACCAATTGCGAAGGCAGCTAGCTAGGCCTACATTGACGCTGAGG…
b48b36fd238c500f44d98ee55ea404f2	D_0__Bacteria;D_1__Proteobacteria;D_2__Gammaproteobacteria;D_3__Steroidobacterales;D_4__Woeseiaceae;D_5__Woeseia	TGGGGAATATTGGACAATGGGCGAAAGCCTGATCCAGCCACGCCGCGTGAGTGATGAAGGCCTTCGGGTCGTAAAGCTCTGTGGGGAGGGACGGAACTATGATGGTTAATACCCATTGTATTGACGGTACCTCCTTAGCAAGCACCGGCTAACTCCGTGCCAGCAGCCGCGGTAATACGGAGGGTGCAAGCGTTAATCGGAATTACTGGGCGTAAAGCGCGCGTAGGCGGTTTTGTAAGTCGGATGTGAAAGCCCAGGGCTTAACCTTGGAATTGCATTCGATACTGCTTGACTAGAGTATGGTAGAGGGAAGTGGAATTTCCGGTGTAGCGGTGAAATGCGTAGATATCGGAAGGAACACCAGTGGCGAAGGCGACTTCCTGGGCCAATACTGACGCT…
e30e42b98fdcd99a4af03b4796a1ec11	D_0__Bacteria;D_1__Bacteroidetes;D_2__Bacteroidia;D_3__Flavobacteriales;D_4__Flavobacteriaceae;D_5__Ulvibacter	TGAGGAATATTGGACAATGGGCGAGAGCCTGATCCAGCCATGCCGCGTGCAGGAAGACGGCCCTATGGGTTGTAAACTGCTTTTATACAGGAAGAAACACTCCCTCGTGAGGGAATTTGACGGTACTGTAAGAATAAGGACCGGCTAACTCCGTGCCAGCAGCCGCGGTAATACGGAGGGTCCGAGCGTTATCCGGAATCATTGGGTTTAAAGGGTCCGTAGGCGGGCAGCTAAGTCAGTGGTGAAAGTCTGCAGCTCAACTGTAGAATTGCCATTGATACTGGTTGTCTTGAATTATTATGAAGTGGTTAGAATATGTAGTGTAGCGGTGAAATGCATAGATATTACATAGAATACCAATTGCGAAGGCAGATCACTAATAATATATTGACGCTGATG…
e022a9eba57a5842fcb428bcb150f975	D_0__Bacteria;D_1__Bacteroidetes;D_2__Bacteroidia;D_3__Bacteroidetes VC2.1 Bac22;D_4__uncultured Bacteroidetes bacterium;D_5__uncultured Bacteroidetes bacterium;D_6__uncultured Bacteroidetes bacterium	TAAGGAATATTGGTCAATGGAGGAAACTCTGAACCAGCCATGCCGCGTGCAGGAAGACGGCCCTATGGGTTGTAAACTGCTTTTATATAGGAATAAACCCTTTCTCGTGAGAAAGGCTGAAGGTACTATACGAATAAGGACCGGCTAACTCCGTGCCAGCAGCCGCGGTAATACGGAGGGTCCAAGCGTTATCCGGATTTATTGGGTTTAAAGGGTGCGCAGGCGGACCTATCAGTCAGTGGTGAAATCCCGGGGCTCAACTCCGGAACTGCCATTGATACTGTAGGTCTTGAGTTTGGTTGAAGTGGGCGGAATGTAGCATGTAGCGGTGAAATGCATAGATATGTCATAGAACACCGATTGCGAAGGCAGCTCACTAAAGTAGTATTGACGCTCAGG…
7ce7246d53c13bb87e28b00a525f2965	D_0__Bacteria;D_1__Bacteroidetes;D_2__Bacteroidia;D_3__Bacteroidales;D_4__SB-5	TGAGGAATATTGCGCAATGGACGAAAGTCTGACGCAGCCATGCCGCGTGCAGGATGACGGCCCTACGGGTTGTAAACTGCTTTTATACAGGAAGAAAACTATGCTCGTGAGCGTGGTTGACGGTACTGTAAGAATAAGCATCGGCTAACTCCGTGCCAGCAGCCGCGGTAATACGGAGGATGCAAGCGTTATCCGGATTTATTGGGTTTAAAGGGTGCGTAGGCGGAATAATAAGTCAGTGGTGAAATCCTGCAGCTTAACTGTAGAACTGCCATTGATACTGTTATTCTTGAATATAGTTGAGGTAGGCGGAATGTGTAATGTAGCGGTGAAATGCATAGATATTACACAGAACACCGATTGCGTAGGCAGCTTACTAAGCTATTATTGACGCTCAGG…
e9dfce01ae0e43a56ff9f8adb1747375	D_0__Bacteria;D_1__Bacteroidetes;D_2__Bacteroidia;D_3__Bacteroidales	TGGGGAATATTGCACAATGGGCGCAAGCCTGATGCAGCAATGCCGCGTGTGTGAAGAAGGCCTGCGGGTTGTAAAGCACTTTTATTAGGAAAGAAAAACCCGGAGCTAATACCTCCGGCATTGACGGTACCTAAAGAATAAGCATCGGCTAACTCCGTGCCAGCAGCCGCGGTAATTCGGAGGATGCAAGCGTTATCCGGATTTATTGGGTTTAAAGGGTGCGTAGGCGGAAATTTAAGTCAGTGGTGAAATCCTACAGCTCAACTGTAGAACTGCCATTGATACTAATTTTCTTGAGTATAGTTGAGGTGGGCGGAATGTGTAATGTAGCGGTGAAATGCTTAGAGATTACACAGAACACCGATTGCGTAGGCAGCTCACTAAACTATTACTGACGCT…
18e14e11862b2a7fdc8714f6bbc76811	D_0__Bacteria;D_1__Planctomycetes;D_2__Planctomycetacia;D_3__Planctomycetales;D_4__Gimesiaceae;D_5__uncultured;D_6__uncultured planctomycete	TCGAGAATCTTCGGCAATGGACGCAAGTCTGACCGAGCGACGTCGCGTGCGGGATGAAGGCCTTCGGGTTGTAAACCGCTGTCAGAGGGGAGGAAATGGTTGGGGGCTATCCCCCTTCCTTGACTGAGCCTCAGAGGAAGCACGGGCTAAGTACGTGCCAGCAGCCGCGGTAATACGTACTGTGCGAACGTTATTCGGAATCACTGGGCTTAAAGGGTGCGTAGGCGGTTATTTAAGTAGGATGTGAAATCTCCCGGCTCAACCGGGGAACTGCGTTCTAAACTGGATAACTTGAGTAAGATAGAGGTGTGCGGAACTTCCGGTGGAGCGGTGAAATGTGTTGATATCGGAGGGAACACCGTTGGCGAAAGCGGCACACTGGGTCTTAACTGACGCTGA…
4d9f59ee5c7771b3f0661fee1912b1e6	D_0__Bacteria;D_1__Planctomycetes;D_2__Planctomycetacia;D_3__Pirellulales;D_4__Pirellulaceae;D_5__Rubripirellula	TCGAGAATCTTCGGCAATGGACGAAAGTCTGACCGAGCGACGCCGCGTGCGGGATGAAGGCCCTCGGGTTGTAAACCGCTGTCAGTAGTTAGGAAGTCCATGAGGGTTATCCCTCATGGTTGACCGATCTTCAGAGGAAGGACGGGCTAAGTTCGTGCCAGCAGCCGCGGTAAGACGAACCGTCCAAACGTTATTCGGTATCACTGGGCTTAAAGCGTGCGTAGGCGGCTTGGTAGGTGAGATGTGAAAGCCCACGGCTCAACCGTGGAATTGCGTTTCAAACCCCCAAGCTCGAGGAAGATAGGGGTGATGGGAACTTATGGTGGAGCGGTGAAATGCGTTGATATCATAGGGAACACCGGTGGCGAAAGCGCATCACTGGATCTTTTCTGACGCTGA…
43ffcf8beb878eae98307b12c460a5cf	D_0__Bacteria;D_1__Chloroflexi;D_2__Dehalococcoidia;D_3__S085;D_4__uncultured bacterium;D_5__uncultured bacterium;D_6__uncultured bacterium	CGAGGAATCTTGCGCAATGGGCGAAAGCCTGACGCAGCAACGCCGCGTGGGGGAAGAAGGCTTTCGAGTCGTAAACCCCTTTTGCAGGGGAAGAAGATCTGACGGTACCCTGCGAATAAGCCACGGCTAACTACGTGCCAGCAGCCGCGGTAATACGTAGGTGGCAAGCGTTGTCCGGATTTATTGGGCGTAAAGGGCGCGTAGGCGGTCCATTAAGTTCGGGGTGAAATCTCCCGGCTTAACTGGGAGCGGTCCCCGGATACTGATGGACTAGAGGGGGGTAGAGGAAGGCGGAATTCCCGGAGTAGCGGTGAAATGCGTAGATACCGGGAGGAACACCGGTGGCGAAGGCGGCCTTCTGGGCCTACCCTGACGCTGAGGCGCGAAAGCGTGGGGAGC…
9da580a5b177657802dd500e4c1b26a1	D_0__Bacteria;D_1__Proteobacteria;D_2__Deltaproteobacteria;D_3__Myxococcales;D_4__bacteriap25;D_5__uncultured organism;D_6__uncultured organism	TGGGGAATACTGGACAATGGGCGAAAGCCTGATCCAGCAACGCCGCGTGAGTGATGAAGGCCCTCGGGTTGTAAAGCTCTGTCAGAGGGAACGAATAAGGGTGACCTAATACGTCATCTGGTGACGGTACCCACAAAGGAAGCACCGGCTAACTCTGTGCCAGCAGCCGCGGTAAGACAGAGGGTGCAAGCGTTGTTCGGAATTACTGGGCGTAAAGGGCGTGTAGGCGGTGAAGTGTGTCTGATGTGAAAGCCCTCGGCTCAACCGGGGAATGGCATTGGAAACTACTTCACTCGAGTACGAGAGAGGGTGGCGGAATTCCTAGTGTAGAGGTGAAATTCGTTGATACTAGGAGGAACACCTGAGGCGAAGGCGGCCACCTGGCTCGTAACTGACGCT…
[truncated: 25,023 more rows]
