# Supplementary material for: Comparing sediment DNA extraction methods for assessing organic enrichment associated with marine aquaculture
Source: PeerJ. 2020 Oct 27;8:e10231. doi: 10.7717/peerj.10231 (PMC7597629; doi:10.7717/peerj.10231)
Supplement: Supplemental Information 4 [file peerj-08-10231-s004.xlsx]

## Sheet: TableS3
		# Reads 16S	# Reads 18S	16S rarefied richness	18S rarefied richness
Q.PS.150	SIL-TRIAL01	4723	98270	335	356
Q.PS.150	SIL-TRIAL02	4787	43402	342	259
Q.PS.150	SIL-TRIAL03	12672	103719	539	321
Q.PS.50	SIL-TRIAL04	20202	47115	599	324
Q.PS.50	SIL-TRIAL05	10911	92441	436	358
Q.PS.50	SIL-TRIAL06	16931	67368	539	359
Q.PS.Pen	SIL-TRIAL07	46793	70635	525	188
Q.PS.Pen	SIL-TRIAL08	10125	31511	345	256
Q.PS.Pen	SIL-TRIAL09	19063	133804	470	443
Q.PS.CTL	SIL-TRIAL10	22576	104800	780	767
Q.PS.CTL	SIL-TRIAL11	29128	66637	811	590
Q.PS.CTL	SIL-TRIAL12	23775	74916	791	662
Q.PS.Pro.150	SIL-TRIAL13	16186	66998	525	413
Q.PS.Pro.150	SIL-TRIAL14	6531	101098	306	348
Q.PS.Pro.150	SIL-TRIAL15	26304	169097	577	422
Q.PS.Pro.50	SIL-TRIAL16	10887	70013	405	402
Q.PS.Pro.50	SIL-TRIAL17	13828	70417	473	344
Q.PS.Pro.50	SIL-TRIAL18	17845	111484	504	361
Q.PS.Pro.Pen	SIL-TRIAL19	27041	98955	393	379
Q.PS.Pro.Pen	SIL-TRIAL20	12906	52190	287	280
Q.PS.Pro.Pen	SIL-TRIAL21	23227	115294	415	448
Q.PS.Pro.CTL	SIL-TRIAL22	33273	111336	1109	505
Q.PS.Pro.CTL	SIL-TRIAL23	42893	49900	923	190
Q.PS.Pro.CTL	SIL-TRIAL24	34516	120667	1089	361
FAV2.150	SIL-TRIAL25	1803	110488	NA	244
FAV2.150	SIL-TRIAL26	1141	36246	NA	200
FAV2.150	SIL-TRIAL27	1924	43384	NA	107
FAV2.50	SIL-TRIAL28	819	16469	NA	200
FAV2.50	SIL-TRIAL29	3266	40316	NA	258
FAV2.50	SIL-TRIAL30	4756	81555	178	287
FAV2.Pen	SIL-TRIAL31	7919	44195	113	130
FAV2.Pen	SIL-TRIAL32	6794	50127	135	140
FAV2.Pen	SIL-TRIAL33	1803	59166	NA	164
FAV2.CTL	SIL-TRIAL34	35398	81806	737	207
FAV2.CTL	SIL-TRIAL35	28757	37138	590	123
FAV2.CTL	SIL-TRIAL36	5250	90837	242	283
FAV5.150	SIL-TRIAL37	7550	104104	339	371
FAV5.150	SIL-TRIAL38	1388	39667	NA	279
FAV5.150	SIL-TRIAL39	1872	114768	NA	232
FAV5.50	SIL-TRIAL40	1510	46852	NA	395
FAV5.50	SIL-TRIAL41	3644	77967	NA	349
FAV5.50	SIL-TRIAL42	23242	99130	536	388
FAV5.Pen	SIL-TRIAL43	14633	2106	130	NA
FAV5.Pen	SIL-TRIAL44	4419	17455	114	104
FAV5.Pen	SIL-TRIAL45	7311	40586	125	130
FAV5.CTL	SIL-TRIAL46	27543	57990	621	393
FAV5.CTL	SIL-TRIAL47	17861	46869	466	268
FAV5.CTL	SIL-TRIAL48	15495	106603	467	564
QIA2.150	SIL-TRIAL49	5482	97878	302	378
QIA2.150	SIL-TRIAL50	2063	23341	NA	230
QIA2.150	SIL-TRIAL51	10932	103247	372	370
QIA2.50	SIL-TRIAL52	552	1677	NA	NA
QIA2.50	SIL-TRIAL53	11963	10248	323	159
QIA2.50	SIL-TRIAL54	21350	100558	458	418
QIA2.Pen	SIL-TRIAL55	19245	86141	185	190
QIA2.Pen	SIL-TRIAL56	9160	43626	158	219
QIA2.Pen	SIL-TRIAL57	21875	51374	239	171
QIA2.CTL	SIL-TRIAL58	21664	165130	490	587
QIA2.CTL	SIL-TRIAL59	8600	94159	258	516
QIA2.CTL	SIL-TRIAL60	35697	79466	496	252
