# Supplementary material for: Comparing sediment DNA extraction methods for assessing organic enrichment associated with marine aquaculture
Source: PeerJ. 2020 Oct 27;8:e10231. doi: 10.7717/peerj.10231 (PMC7597629; doi:10.7717/peerj.10231)
Supplement: Supplemental Information 6 [file peerj-08-10231-s006.xlsx]

## Sheet: TableS5
FAV2	FAV5	Q.PS	Q.PS.Pro	QIA2	Phylum	Class
86	129	88	148	154	Apicomplexa	Conoidasida
39	46	34	21	39	Holozoa	Scolecida
41	55	56	61	56	Apicomplexa	Novel Apicomplexa Class 1
60	134	361	247	175	Holozoa	Chromadorea
55	45	83	57	53	Holozoa	Copepoda
11	8	22	26	12	Dinophyceae	Gonyaulacales
6	6	1	4	10	Chlorophyta	Trebouxiophyceae
10	26	25	37	18	Holozoa	Podocopa
33	29	16	8	37	Holozoa	Ascidiacea
20	20	27	24	19	Holozoa	Palpata
17	25	67	41	26	Holozoa	Enoplea
18	30	26	39	27	Apicomplexa	Novel Apicomplexa Class 2
338	551	608	492	365	Rhizaria	Cercozoa
75	84	50	45	121	Protalveolata	Syndiniales
4	5	10	3	8	Ciliophora	Spirotrichea
7	8	7	22	13	Dinophyceae	Suessiaceae
15	13	9	10	12	Holozoa	Pteriomorphia
1	2	3	2	3	Holozoa	Eumalacostraca
5	4	8	10	5	Holozoa	Seriata
20	15	26	23	18	Holozoa	Gastrotricha
26	28	60	67	34	Incertae Sedis	Breviatea
28	34	38	29	42	Ciliophora	Hypotrichia
4	6	5	1	2	Holozoa	Scyphozoa
14	14	16	25	55	Dinophyceae	Gymnodinium clade
5	8	10	11	4	Holozoa	Enopla
18	15	19	18	20	Holozoa	Rhabditophora
37	49	119	67	47	Holozoa	Metazoa (Animalia)
31	47	59	50	37	Ciliophora	Prostomatea
18	21	46	32	11	Holozoa	Rhabdocoela
1	5	13	13	3	Holozoa	Kinorhyncha
9	8	5	3	2	Holozoa	Echinodermata
5	6	3	5	4	Holozoa	Copelata
22	21	36	28	32	Dinophyceae	Peridiniales
4	7	7	1	2	Holozoa	Demospongiae
3	6	9	7	7	Apicomplexa	uncultured eukaryote
11	15	20	12	12	Holozoa	Heteroconchia
45	73	79	63	69	Nucletmycea	Fungi
1	1	2	4	2	Dinophyceae	Kareniaceae
8	12	15	9	12	Ciliophora	Euplotia
14	18	37	23	14	Ciliophora	Scuticociliatia
7	21	25	13	21	Protalveolata	Perkinsidae
6	6	18	9	6	Excavata	Metamonada
6	3	1	1	2	Charophyta	Poales
7	17	25	13	38	Ciliophora	Choreotrichia
23	26	28	15	26	Holozoa	Hydroidolina
11	14	16	22	19	Holozoa	Ichthyosporea
18	31	43	27	21	Ciliophora	Suctoria
1	6	2	2	6	Protalveolata	Ellobiopsidae
2	2	2	2	1	Ciliophora	Armophorida
2	5	3	1	5	Dinophyceae	Noctilucales
4	5	2	2	8	Holozoa	Anopla
2	1	1	1	0	Holozoa	Protobranchia
6	12	8	7	20	Rhizaria	Retaria
2	7	8	10	6	Ciliophora	Conthreep
2	6	4	3	3	Holozoa	Gastropoda
1	0	3	2	1	Ciliophora	Intramacronucleata
7	8	0	0	1	Holozoa	Thaliacea
1	2	1	1	0	Charophyta	Myrtales
5	4	0	1	0	Holozoa	Tetrapoda
0	7	8	8	7	Dinophyceae	Thoracosphaeraceae
4	2	1	1	1	Charophyta	Spermatophyta
9	24	22	12	17	Rhodophyceae	Florideophycidae
3	3	1	0	8	Holozoa	Polyplacophora
10	8	4	6	10	Haptophyta	Prymnesiophyceae
2	1	5	6	1	Dinophyceae	Peridiniphycidae
1	2	2	2	1	Holozoa	Oligochaeta
0	1	2	2	1	Holozoa	Chaetonotida
1	2	8	4	2	Protalveolata	Colpodellida
0	1	0	0	2	Charophyta	Zingiberales
1	5	4	8	3	Dinophyceae	Dinophysiales
5	4	16	5	3	Protalveolata	Chromerida
1	1	16	8	2	Ciliophora	Plagiopylida
1	1	3	5	3	Holozoa	Arachnida
0	0	2	2	2	Ciliophora	Plagiopylea
3	3	4	3	5	Chlorophyta	Ulvophyceae
3	17	14	9	6	Amoebozoa	Discosea
4	2	4	2	1	Incertae Sedis	Telonema
1	2	5	6	2	uncultured	uncultured eukaryote
2	3	4	0	2	Dinophyceae	Dinophyceae
5	3	2	1	7	Holozoa	Hexacorallia
2	3	5	3	2	Ciliophora	Apostomatia
1	2	5	8	2	Haptophyta	uncultured eukaryote
4	5	11	19	18	Ciliophora	Oligotrichia
18	27	38	23	32	Incertae Sedis	Apusomonadidae
0	0	2	1	0	Holozoa	Dorylaimia
0	0	1	1	1	Holozoa	Trachylinae
4	8	6	3	1	Ciliophora	Nassophorea
3	10	12	10	5	Ciliophora	Karyorelictea
0	0	0	1	0	Holozoa	Myodocopa
6	4	13	9	4	Ciliophora	Armophorea
16	21	23	24	24	Ciliophora	Haptoria
4	1	1	1	2	Charophyta	Fabales
1	1	0	1	1	Holozoa	Brachiopoda
1	1	5	2	0	Holozoa	Stenolaemata
0	1	4	5	0	Amoebozoa	Archamoebae
9	6	3	1	8	Holozoa	Neopterygii
1	2	2	4	0	NAMAKO-1	uncultured eukaryote
1	3	1	2	1	Ciliophora	Heterotrichea
17	19	21	13	15	Nucletmycea	Nucleariidae and Fonticula group
2	2	11	8	1	Ciliophora	Odontostomatida
0	0	0	0	3	Charophyta	Brassicales
3	4	9	18	6	Chlorophyta	Chlorophyceae
2	1	2	0	0	Ciliophora	Phyllopharyngea
0	0	0	5	2	Apicomplexa	Cryptosporida
1	1	1	2	0	Centrohelida	H15-6
0	3	6	7	11	Apicomplexa	Piroplasmorida
0	2	5	1	0	Holozoa	Nematoda
5	9	6	2	9	Holozoa	Choanoflagellida
0	1	0	0	0	Holozoa	Eutardigrada
0	2	1	1	2	Cryptophyceae	Cryptomonadales
0	0	1	0	1	Holozoa	Cyclorhagida
0	1	0	0	0	Holozoa	Coloniales
5	8	17	9	3	Ciliophora	Oligohymenophorea
0	1	0	0	3	Picozoa	Picomonadida
3	2	2	4	2	Ciliophora	Litostomatea
1	2	1	1	1	Ciliophora	Peniculia
1	2	5	3	2	Ciliophora	Cyrtophoria
0	5	1	0	2	Amoebozoa	Incertae Sedis
0	5	2	2	3	Dinophyceae	Gymnodiniphycidae
0	0	0	1	4	Haptophyta	Pavlovophyceae
1	2	1	0	5	Dinophyceae	Incertae Sedis
0	1	0	0	1	Stramenopiles	uncultured
1	5	3	0	2	Centrohelida	Acanthocystidae
1	3	5	2	2	Ciliophora	Postciliodesmatophora
0	0	0	0	1	Protalveolata	Incertae Sedis
3	4	9	2	6	Amoebozoa	Protosporangiida
1	4	1	1	1	Cryptophyceae	Goniomonas
0	1	0	0	1	Holozoa	Echiura
0	0	0	1	1	Charophyta	Asterales
9	3	8	1	3	Amoebozoa	Tubulinea
0	1	1	0	4	Centrohelida	H26-1
0	1	1	0	1	Holozoa	Anomalodesmata
0	0	0	0	1	Excavata	Discoba
2	0	2	1	2	Ciliophora	Mesodiniidae
0	1	3	0	1	Holozoa	Enteropneusta
0	0	0	0	1	Holozoa	Tentaculata
0	0	0	1	1	Holozoa	Rhynchonellata
0	0	1	0	2	Charophyta	Polypodiales
2	3	7	3	4	Ciliophora	Peritrichia
2	1	0	0	2	Stramenopiles	Ochrophyta
1	4	3	0	1	Cryptophyceae	Kathablepharidae
0	1	1	0	0	Incertae Sedis	Palpitomonas
0	0	2	1	0	Charophyta	Araucariales
0	0	0	0	1	Holozoa	Gnathostomulida
0	1	0	1	0	Amoebozoa	Schizoplasmodiida
0	0	1	0	0	Holozoa	Solitaria
0	2	1	1	0	Holozoa	Acoelomorpha
1	2	10	4	0	Holozoa	Monogononta
0	1	1	0	0	Holozoa	Sipuncula
0	0	0	1	0	Charophyta	Fagales
0	0	0	1	0	Incertae Sedis	Rigifilida
0	1	0	0	0	Incertae Sedis	Ancyromonadida
0	0	1	0	0	Holozoa	Nemertodermatida
0	0	1	0	0	Holozoa	Priapulida
0	1	0	0	0	Dinophyceae	Podolampadaceae
1	0	1	0	0	Holozoa	Filasterea
0	1	0	0	0	Haptophyta	metagenome
0	0	1	0	0	Holozoa	Gymnolaemata
0	0	0	1	0	Ciliophora	Colpodida
0	0	0	0	1	Ciliophora	Cyrtolophosidida
1	0	0	0	0	Holozoa	Elasmobranchii
0	0	0	0	1	Incertae Sedis	Mantamonas
0	0	1	0	0	Ciliophora	Astomatia
0	0	0	1	0	Stramenopiles	MAST-1
